# Supplementary material
Source: Royal Society of Chemistry journal article supplement (doi:10.1039/d6qo00448b)
Supplement: d6qo00448b1.pdf [file d6qo00448b1.pdf]

## SUPPORTING INFORMATION

---

# Chemo-Orthogonal Biaryl Formation via Pd/Cu-Catalyzed Decarboxylative Coupling of Arylthianthrenium Salts

Duo Zhang,<sup>†a</sup> Xiaowen Teng,<sup>†b</sup> Shixin Zhuang,<sup>b</sup> Lukas J. Goossen<sup>\*c</sup> and Guodong Zhang<sup>\*b</sup>

<sup>a</sup> Medicine Center, Guangxi University of Science and Technology, Liushi Road 257, 545006, Liuzhou, Guangxi (China).

<sup>b</sup> School of Chemistry and Chemical Engineering, Yangzhou University, Siwangting Road 180, 225002, Yangzhou (China). E-mail: guodong.zhang@yzu.edu.cn

<sup>c</sup> Fakultät für Chemie und Biochemie, Ruhr-Universität Bochum, Universitätsstr. 150, 44801 Bochum (Germany). E-mail: lukas.goossen@rub.de

## Table of Contents

|                                                                                |     |
|--------------------------------------------------------------------------------|-----|
| Table of Contents .....                                                        | 1   |
| General Methods .....                                                          | 2   |
| Preparation of the Starting Materials .....                                    | 2   |
| Optimization of the Reaction Conditions .....                                  | 2   |
| Selectivity on Arylthianthrenium Salts vs Arylhalides and Aryl triflates ..... | 4   |
| Mechanistic Studies.....                                                       | 5   |
| Synthesis and Characterization of the Corresponding Products .....             | 5   |
| One-pot Subsequent Decarboxylative Arylation.....                              | 28  |
| NO <sub>2</sub> as a Leaving Group in Suzuki-Miyaura Coupling.....             | 29  |
| Gram-scale diazonium salt synthesis .....                                      | 30  |
| Further Derivatization from Diazonium Salts .....                              | 31  |
| Synthesis of Fungicides.....                                                   | 34  |
| Copies of <sup>1</sup> H and <sup>13</sup> C NMR Spectra.....                  | 38  |
| References .....                                                               | 134 |

## General Methods

All reagents were purchased from commercial suppliers without further purification, and solvents were degassed with argon prior to use. Reactions were performed in oven-dried glassware under an argon atmosphere containing a Teflon-coated stirring bar and dry septum. All reactions were monitored by GC using tetradecane as an internal standard. Analytical TLC was performed with silica gel GF254 plates, and the products were visualized by UV detection. Flash column chromatography was performed over silica gel (200-300 mesh). NMR spectra were recorded on an Agilent DD2 400 MHz spectrometers using  $\text{CDCl}_3$  or  $\text{DMSO}-d_6$  as solvent with proton (400) and carbon (101) resonances. Chemical shifts ( $\delta$  values) were reported in ppm relative to internal TMS ( $^1\text{H}$  NMR) or  $\text{CDCl}_3$  ( $^{13}\text{C}$  NMR), respectively, and spin-spin coupling constants ( $J$ ) were given in Hz. Melting points were measured on a Yanaco Micro Melting Point Apparatus. The High-resolution mass spectral (HRMS) data were obtained on Bruker Daltonics maXis Q-TOF (APCI and ESI).

## Preparation of the Starting Materials

All the potassium carboxylates were prepared according to known literatures from carboxylic acids with potassium *t*-butoxide in EtOH.<sup>1</sup>

All the arylthianthrenium salts were prepared according to known literatures from arenes or arylboronic acids with thianthrene S-oxide in DCM or MeCN.<sup>2</sup> The arylthianthrenium salts were precipitated and washed with diethyl ether without further purification for the direct use.”

## Optimization of the Reaction Conditions

**Table S1:** Optimization of the reaction conditions using potassium 2-nitrobenzoate (**1**) and *p*-methoxyphenylthianthrenium salt (**2**).<sup>a</sup>

| entry | Pd                        | L1             | Cu                    | L2    | Solvent          | T   | yield (%) |           |
|-------|---------------------------|----------------|-----------------------|-------|------------------|-----|-----------|-----------|
|       |                           |                |                       |       |                  |     | <b>3</b>  | <b>3'</b> |
| 1     | $\text{Pd}(\text{OAc})_2$ | $\text{PPh}_3$ | CuI                   | Phen  | NMP/pyridine     | 110 | 30        | 15        |
| 2     | "                         | "              | "                     | "     | DMSO             | 110 | 43        | 10        |
| 3     | "                         | "              | "                     | "     | DMAc             | "   | 35        | 11        |
| 4     | "                         | "              | "                     | "     | NMP              | "   | 36        | 8         |
| 5     | "                         | "              | "                     | "     | DMF              | "   | 30        | 6         |
| 6     | "                         | "              | "                     | "     | Anisole          | "   | 0         | <1        |
| 7     | "                         | "              | "                     | "     | <i>p</i> -xylene | "   | 2         | <1        |
| 8     | $\text{Pd}(\text{OAc})_2$ | $\text{PPh}_3$ | "                     | Phen  | DMSO             | 120 | 79        | <1        |
| 9     | "                         | "              | CuCl                  | "     | "                | "   | 77        | <1        |
| 10    | "                         | "              | CuBr                  | "     | "                | "   | 75        | <1        |
| 11    | "                         | "              | $\text{Cu}_2\text{O}$ | "     | "                | "   | 72        | <1        |
| 12    | "                         | "              | $\text{CuCl}_2$       | "     | "                | "   | 15        | <1        |
| 13    | "                         | "              | -                     | "     | "                | "   | 0         | 8         |
| 14    | $\text{Pd}(\text{OAc})_2$ | $\text{PPh}_3$ | CuI                   | dtbpy | DMSO             | 120 | 87        | <1        |

## SUPPORTING INFORMATION

|                 |                       |                         |     |       |      |     |    |    |
|-----------------|-----------------------|-------------------------|-----|-------|------|-----|----|----|
| 15              | "                     | "                       | "   | bpy   | "    | "   | 89 | <1 |
| 16              | "                     | "                       | "   | TEMED | "    | "   | 88 | <1 |
| 17              | "                     | "                       | "   | None  | "    | "   | 40 | 13 |
| 18              | PdCl <sub>2</sub>     | PPh <sub>3</sub>        | CuI | bpy   | DMSO | 120 | 85 | <1 |
| 19              | Pd(acac) <sub>2</sub> | "                       | "   | "     | "    | "   | 88 | <1 |
| 20              | Pd(TFA) <sub>2</sub>  | "                       | "   | "     | "    | "   | 89 | <1 |
| 21 <sup>b</sup> | Pd(OAc) <sub>2</sub>  | PPh <sub>3</sub>        | CuI | bpy   | DMSO | 120 | 78 | <1 |
| 22              | Pd(OAc) <sub>2</sub>  | P(Cy) <sub>3</sub>      | CuI | bpy   | DMSO | 120 | 81 | <1 |
| 23              | "                     | P(5F-Ph) <sub>3</sub>   | "   | "     | "    | "   | 76 | <1 |
| 24              | "                     | P(2-Furyl) <sub>3</sub> | "   | "     | "    | "   | 81 | <1 |
| 25              | Pd(OAc) <sub>2</sub>  | None                    | CuI | bpy   | DMSO | 120 | 99 | <1 |
| 26              | None                  | P(Cy) <sub>3</sub>      | "   | "     | "    | "   | 0  | <1 |
| 27 <sup>c</sup> | Pd(OAc) <sub>2</sub>  | None                    | "   | "     | "    | "   | 18 | 6  |
| 28 <sup>d</sup> | "                     | "                       | "   | "     | "    | "   | 0  | <1 |
| 29 <sup>e</sup> | "                     | "                       | "   | "     | "    | "   | 0  | 12 |
| 30 <sup>f</sup> | "                     | "                       | "   | "     | "    | "   | 99 | <1 |
| 31 <sup>g</sup> | "                     | "                       | "   | "     | "    | "   | 5  | 8  |

<sup>a</sup> Conditions: 0.2 mmol of **1**, 0.24 mmol of **2**, 2.5 mol% of [Pd] catalyst, 5 mol% of L1, 5 mol% of [Cu] catalyst, 5 mol% of L2, in 1 mL of solvent, under an argon atmosphere for 16 h; Yields determined by GC using *n*-tetradecane as the internal standard. <sup>b</sup> with 2 mol% of Pd(OAc)<sub>2</sub>. <sup>c</sup> with 2.5 mol% of CuI and 2.5 mol% of bpy. <sup>d</sup> under air. <sup>e</sup> with 0.2 mmol of H<sub>2</sub>O. <sup>f</sup> with 0.1 mmol of thianthrene. <sup>g</sup> 0.24 mmol of 2-nitrobenzoic acid and 0.36 mol of K<sub>2</sub>CO<sub>3</sub> instead of **2**.

## Selectivity on Arylthianthrenium Salts vs Arylhalides and Aryl triflates

### Control Experiment with Arylhalides and Aryl triflates

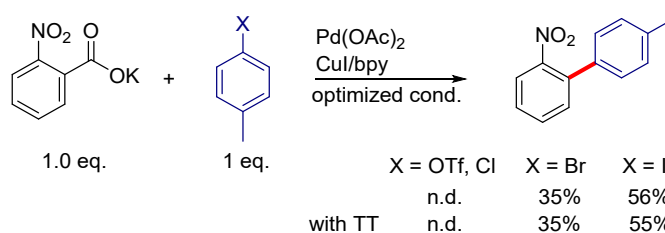

Reaction Conditions: 0.2 mmol aryl halides or aryl triflates, 0.2 mmol 2-nitrobenzoate, with or without 0.1 mol thianthrene, 2.5 mol% Pd(OAc)<sub>2</sub>, 5 mol% CuI, 5 mol% bpy, in 1 mL DMSO, at 120 °C, under an argon atmosphere for 16 h.

**Procedure:** An oven-dried vessel was charged with arylhalides or aryl triflates (0.20 mmol, 1 equiv.), and 2-nitrobenzoate (0.20 mmol, 1.2 equiv.), Pd(OAc)<sub>2</sub> (1.2 mg, 5.00 μmol, 0.025 equiv.), CuI (1.9 mg, 0.01 mmol, 0.05 equiv.), bpy (1.6 mg, 0.01 mmol, 0.05 equiv.), with or without thianthrene (21.6 mg, 0.1 mmol, 0.5 equiv.). Under argon atmosphere conditions, DMSO (1 mL) was added via syringe. The resulting reaction mixture was stirred at 120 °C for 16 h. Brine (10 mL) was added and the resulting mixture was extracted with ethyl acetate (3×20 mL). The combined organic layers were dried over MgSO<sub>4</sub>, filtered, and the volatiles were removed under reduced pressure. The residue was purified by column chromatography (SiO<sub>2</sub>, ethyl acetate/cyclohexane gradient), affording the corresponding products.

### Competing Experiment using Arylthianthrenium Salts with Arylhalides or Aryl triflates

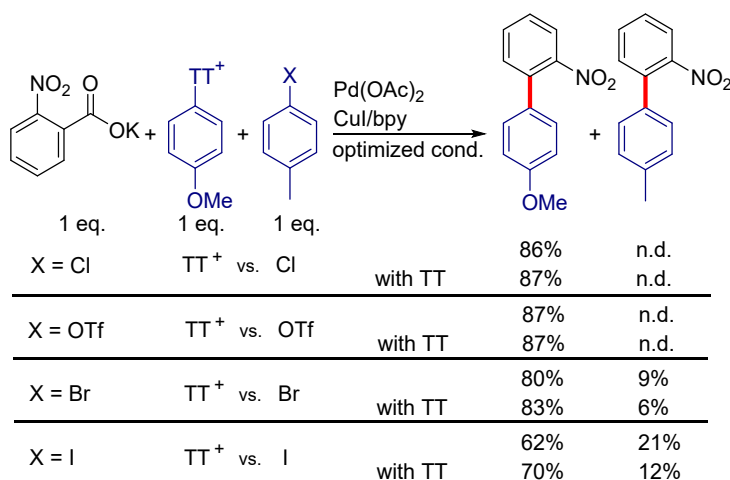

Reaction Conditions: 0.2 mmol 2-nitrobenzoate, 0.2 mmol aryl halides, 0.2 mmol arylthianthrenium salt, with or without 0.1 mol thianthrene, 2.5 mol% Pd(OAc)<sub>2</sub>, 5 mol% CuI, 5 mol% bpy, in 1 mL DMSO, at 120 °C, under an argon atmosphere for 16 h.

**Procedure:** An oven-dried vessel was charged with arylhalides or aryl triflates (0.20 mmol, 1 equiv.), arylthianthrenium salt (0.20 mmol, 1 equiv.), and 2-nitrobenzoate (0.20 mmol, 1.2 equiv.), Pd(OAc)<sub>2</sub> (1.2 mg, 5.00 μmol, 0.025 equiv.), CuI (1.9 mg, 0.01 mmol, 0.05 equiv.), bpy (1.6 mg, 0.01 mmol, 0.05 equiv.), with or without thianthrene (21.6 mg, 0.1 mmol, 0.5 equiv.). Under argon atmosphere conditions, DMSO (1 mL) was added via syringe. The resulting reaction mixture was stirred at 120 °C for 16 h. Brine (10 mL) was added and the resulting mixture was extracted with ethyl acetate (3×20 mL). The combined organic layers were dried over MgSO<sub>4</sub>, filtered, and the volatiles were removed under reduced pressure. The residue was purified by column chromatography (SiO<sub>2</sub>, ethyl acetate/cyclohexane gradient), affording the corresponding products.

## Mechanistic Studies

### Effect of thianthrene addition on the transformation

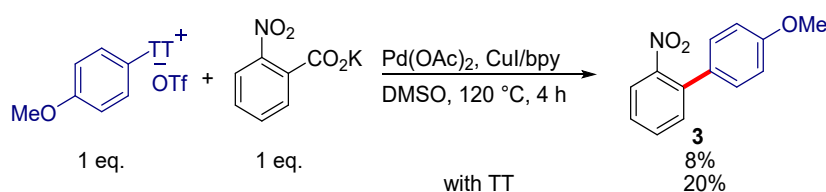

Reaction Conditions: 0.2 mmol 2-nitrobenzoate, 0.2 mmol 5-(4-methoxyphenyl)-5H-thianthren-5-ium trifluoromethanesulfonate, with or without 0.1 mol thianthrene, 2.5 mol% Pd(OAc)<sub>2</sub>, 5 mol% Cul, 5 mol% bpy, in 1 mL DMSO, at 120 °C, under an argon atmosphere for 4 h; isolated yields.

### Effect of thianthrene addition on the decarboxylation

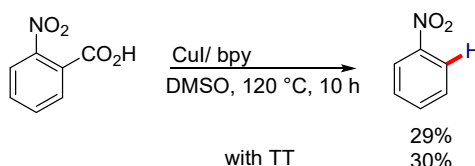

Reaction Conditions: 0.2 mmol 2-nitro benzoic acid, with or without 0.1 mol thianthrene, 5 mol% Cul, 5 mol% bpy, in 1 mL DMSO, at 120 °C, under an argon atmosphere for 10 h; the yields were determined by GC.

### Competing experiments with electronically different arylthianthrenium salts

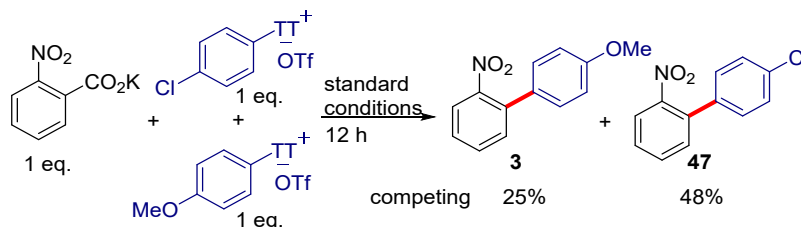

Reaction Conditions: 0.2 mmol 2-nitrobenzoate, 0.2 mmol 5-(4-methoxyphenyl)-5H-thianthren-5-ium trifluoromethanesulfonate, 0.2 mmol 5-(4-chlorophenyl)-5H-thianthren-5-ium trifluoromethanesulfonate, 2.5 mol% Pd(OAc)<sub>2</sub>, 5 mol% Cul, 5 mol% bpy, in 1 mL DMSO, at 120 °C, under an argon atmosphere for 12 h; isolated yields.

## Synthesis and Characterization of the Corresponding Products

**General Procedure A:** An oven-dried vessel was charged with arylthianthrenium salts (0.20 mmol, 1 equiv.), and potassium carboxylate (0.24 mmol, 1.2 equiv.), Pd(OAc)<sub>2</sub> (1.2 mg, 5.00 μmol, 0.025 equiv.), Cul (1.9 mg, 0.01 mmol, 0.05 equiv.), bpy (1.6 mg, 0.01 mmol, 0.05 equiv.). Under argon atmosphere conditions, DMSO (1 mL) was added via syringe. The resulting reaction mixture was stirred at 120 °C for 16 h. Brine (10 mL) was added and the resulting mixture was extracted with ethyl acetate (3×20 mL). The combined organic layers were dried over MgSO<sub>4</sub>, filtered, and the volatiles were removed under reduced pressure. The residue was purified by column chromatography (SiO<sub>2</sub>, ethyl acetate/cyclohexane gradient), affording the corresponding products.

**4'-methoxy-2-nitro-1,1'-biphenyl (3)**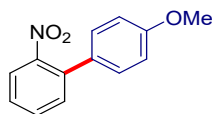

Compound **3** was prepared following the procedure **A**, starting from 5-(4-methoxyphenyl)-5*H*-thianthren-5-ium trifluoromethanesulfonate (94.5 mg, 0.2 mmol) and potassium 2-nitrobenzoate (49.2 mg, 0.24 mmol). After column chromatography on silica (Petroleum Ether: EtOAc = 15:1), **3** was afforded as yellowish-green oil liquid (44.0 mg, 96%).

**<sup>1</sup>H NMR** (400 MHz, CDCl<sub>3</sub>): δ 7.85 – 7.77 (m, 1H), 7.63 – 7.54 (m, 1H), 7.49 – 7.39 (m, 2H), 7.28 – 7.24 (m, 2H), 7.01 – 6.92 (m, 2H), 3.85 (s, 3H) ppm.

**<sup>13</sup>C NMR** (101 MHz, CDCl<sub>3</sub>): δ 159.7, 149.4, 135.8, 132.1, 131.9, 129.5, 129.1, 127.7, 124.0, 114.2, 55.3 ppm.

**HRMS** (ESI-TOF) *m/z*: [M+Na]<sup>+</sup> Calcd for C<sub>13</sub>H<sub>11</sub>NO<sub>3</sub>Na<sup>+</sup> 252.0631; found 252.0626.

**4'-methoxy-5-methyl-2-nitro-1,1'-biphenyl (4)**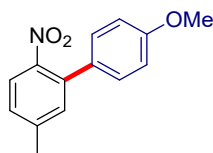

Compound **4** was prepared following the procedure **A**, starting from 5-(4-methoxyphenyl)-5*H*-thianthren-5-ium trifluoromethanesulfonate (94.5 mg, 0.2 mmol) and potassium 5-methyl-2-nitrobenzoate (52.6 mg, 0.24 mmol). After column chromatography on silica (Petroleum Ether: EtOAc = 15:1), **4** was afforded as yellowish-green oil liquid (44.8 mg, 92%).

**<sup>1</sup>H NMR** (400 MHz, CDCl<sub>3</sub>): δ 7.81 – 7.69 (m, 1H), 7.28 – 7.17 (m, 4H), 6.99 – 6.91 (m, 2H), 3.83 (s, 3H), 2.44 (s, 3H) ppm.

**<sup>13</sup>C NMR** (101 MHz, CDCl<sub>3</sub>): δ 159.5, 147.0, 143.1, 136.0, 132.5, 129.9, 129.1, 128.2, 124.3, 114.1, 55.3, 21.3 ppm.

**HRMS** (ESI-TOF) *m/z*: [M+H]<sup>+</sup> Calcd for C<sub>14</sub>H<sub>14</sub>NO<sub>3</sub><sup>+</sup> 244.0968; found 244.0966.

**5-fluoro-4'-methoxy-2-nitro-1,1'-biphenyl (5)**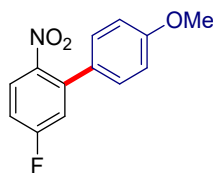

Compound **5** was prepared following the procedure **A**, starting from 5-(4-methoxyphenyl)-5*H*-thianthren-5-ium trifluoromethanesulfonate (94.5 mg, 0.2 mmol) and potassium 5-fluoro-2-nitrobenzoate (53.4 mg, 0.24 mmol). After column chromatography on silica (Petroleum Ether: EtOAc = 15:1), **5** was afforded as yellow solid (44.5 mg, 90%).

**M.P.:** 94 – 95 °C.

**<sup>1</sup>H NMR** (400 MHz, CDCl<sub>3</sub>): δ 7.91 – 7.84 (m, 1H), 7.27 – 7.21 (m, 2H), 7.15 – 7.07 (m, 2H), 6.99 – 6.93 (m, 2H), 3.85 (s, 3H) ppm.

**<sup>13</sup>C NMR** (101 MHz, CDCl<sub>3</sub>): δ 163.8 (d, *J* = 256.9 Hz), 160.0, 139.1 (d, *J* = 9.3 Hz), 129.0, 128.5 (d, *J* = 1.9 Hz), 126.8 (d, *J* = 10.0 Hz), 118.7 (d, *J* = 23.4 Hz), 114.6 (d, *J* = 23.5 Hz), 114.3, 55.3 ppm.

**<sup>19</sup>F NMR** (377 MHz, CDCl<sub>3</sub>): δ – 105.2 ppm.

## SUPPORTING INFORMATION

**HRMS** (ESI-TOF) *m/z*: [M+H]<sup>+</sup> Calcd for C<sub>13</sub>H<sub>11</sub>FNO<sub>3</sub><sup>+</sup> 248.0717; found 248.0711.

### **N-(4'-methoxy-6-nitro-[1,1'-biphenyl]-3-yl)-2-phenylacetamide (6)**

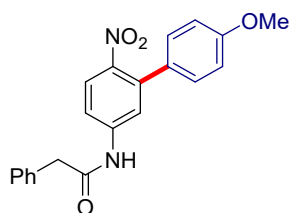

Compound **6** was prepared following the procedure **A**, starting from 5-(4-methoxyphenyl)-5*H*-thianthren-5-ium trifluoromethanesulfonate (94.5 mg, 0.2 mmol) and potassium 2-nitro-5-(2-phenylacetamido)benzoate (81.2 mg, 0.24 mmol). After column chromatography on silica (Petroleum Ether: EtOAc = 3:1), **6** was afforded as yellow waxy liquid (54.4 mg, 75%)

**<sup>1</sup>H NMR** (400 MHz, CDCl<sub>3</sub>): δ 7.88 – 7.72 (m, 2H), 7.59 – 7.51 (m, 1H), 7.47 (s, 1H), 7.39 – 7.31 (m, 3H), 7.28 (d, *J* = 7.5 Hz, 2H), 7.16 (d, *J* = 7.9 Hz, 2H), 6.88 (d, *J* = 8.2 Hz, 2H), 3.79 (s, 3H), 3.70 (s, 2H) ppm.

**<sup>13</sup>C NMR** (101 MHz, CDCl<sub>3</sub>): δ 169.8, 159.6, 144.3, 141.3, 137.8, 133.7, 129.5, 129.3, 129.2, 129.0, 127.8, 125.8, 122.0, 117.8, 114.0, 55.2, 44.6 ppm.

**HRMS** (ESI-TOF) *m/z*: [M+H]<sup>+</sup> Calcd for C<sub>21</sub>H<sub>19</sub>N<sub>2</sub>O<sub>4</sub><sup>+</sup> 363.1339; found 363.1330.

### **N-(4'-methoxy-6-nitro-[1,1'-biphenyl]-3-yl)acetamide (7)**

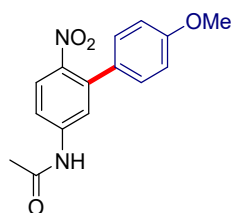

Compound **7** was prepared following the procedure **A**, starting from 5-(4-methoxyphenyl)-5*H*-thianthren-5-ium trifluoromethanesulfonate (94.5 mg, 0.2 mmol) and potassium 5-acetamido-2-nitrobenzoate (63.0 mg, 0.24 mmol). After column chromatography on silica (Petroleum Ether: EtOAc = 3:1), **7** was afforded as brown waxy liquid (49.1 mg, 83%)

**<sup>1</sup>H NMR** (400 MHz, CDCl<sub>3</sub>): δ 8.18 – 8.10 (m, 1H), 7.81 (d, *J* = 8.8 Hz, 1H), 7.67 – 7.52 (m, 2H), 7.21 – 7.11 (m, 2H), 6.94 – 6.82 (m, 2H), 3.80 (s, 3H), 2.16 (s, 3H) ppm.

**<sup>13</sup>C NMR** (101 MHz, CDCl<sub>3</sub>): δ 169.0, 159.6, 141.6, 137.8, 129.6, 129.0, 125.9, 125.0, 121.9, 117.8, 114.1, 55.3, 24.6 ppm.

**HRMS** (ESI-TOF) *m/z*: [M+H]<sup>+</sup> Calcd for C<sub>15</sub>H<sub>15</sub>N<sub>2</sub>O<sub>4</sub><sup>+</sup> 287.1026; found 287.1018.

### **4'-methoxy-4-(methylsulfonyl)-2-nitro-1,1'-biphenyl (8)**

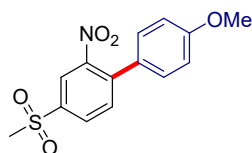

Compound **8** was prepared following the procedure **A**, starting from 5-(4-methoxyphenyl)-5*H*-thianthren-5-ium trifluoromethanesulfonate (94.5 mg, 0.2 mmol) and potassium 4-(methylsulfonyl)-2-nitrobenzoate (68.0 mg, 0.24 mmol). After column chromatography on silica (Petroleum Ether: EtOAc = 10:1), **8** was afforded as yellow solid (59.0 mg, 96%).

## SUPPORTING INFORMATION

**M.P.:** 129 – 130 °C.

**<sup>1</sup>H NMR** (400 MHz, CDCl<sub>3</sub>): δ 8.33 (d, *J* = 1.9 Hz, 1H), 8.16 – 8.09 (m, 1H), 7.66 (d, *J* = 8.1 Hz, 1H), 7.28 – 7.24 (m, 2H), 7.00 – 6.95 (m, 2H), 3.84 (s, 3H), 3.14 (s, 3H) ppm.

**<sup>13</sup>C NMR** (101 MHz, CDCl<sub>3</sub>): δ 160.6, 149.3, 140.9, 140.1, 133.2, 130.4, 129.1, 127.4, 123.4, 114.6, 55.4, 44.4 ppm.

**HRMS** (ESI-TOF) *m/z*: [M+H]<sup>+</sup> Calcd for C<sub>14</sub>H<sub>14</sub>NO<sub>5</sub>S<sup>+</sup> 308.0587; found 308.0581.

### 4'-methoxy-4-methyl-2-nitro-1,1'-biphenyl (9)

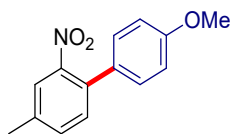

Compound **9** was prepared following the procedure **A**, starting from 5-(4-methoxyphenyl)-5*H*-thianthren-5-ium trifluoromethanesulfonate (94.5 mg, 0.2 mmol) and potassium 4-methyl-2-nitrobenzoate (52.6 mg, 0.24 mmol). After column chromatography on silica (Petroleum Ether: EtOAc = 15:1), **9** was afforded as yellowish-green solid (38.4 mg, 79%).

**M.P.:** 84 – 85 °C.

**<sup>1</sup>H NMR** (400 MHz, CDCl<sub>3</sub>): δ 7.62 (s, 1H), 7.39 (d, *J* = 9.8 Hz, 1H), 7.30 (d, *J* = 7.8 Hz, 1H), 7.26 – 7.20 (m, 2H), 7.00 – 6.89 (m, 2H), 3.84 (s, 3H), 2.45 (s, 3H) ppm.

**<sup>13</sup>C NMR** (101 MHz, CDCl<sub>3</sub>): δ 159.5, 149.2, 138.2, 132.9, 132.9, 131.6, 129.5, 129.1, 124.2, 114.1, 55.3, 20.8 ppm.

**HRMS** (ESI-TOF) *m/z*: [M+H]<sup>+</sup> Calcd for C<sub>14</sub>H<sub>14</sub>NO<sub>3</sub> 244.0968; found 244.0968.

### 4,4'-dimethoxy-2-nitro-1,1'-biphenyl (10)

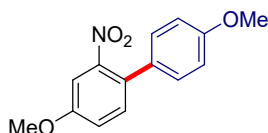

Compound **10** was prepared following the procedure **A**, starting from 5-(4-methoxyphenyl)-5*H*-thianthren-5-ium trifluoromethanesulfonate (94.5 mg, 0.2 mmol) and potassium 4-methoxy-2-nitrobenzoate (56.5 mg, 0.24 mmol). After column chromatography on silica (Petroleum Ether: EtOAc = 12:1), **10** was afforded as yellowish-green solid (38.4 mg, 74%).

**M.P.:** 127 – 128 °C.

**<sup>1</sup>H NMR** (400 MHz, CDCl<sub>3</sub>): δ 7.37 – 7.28 (m, 2H), 7.24 – 7.18 (m, 2H), 7.15 – 7.10 (m, 1H), 6.96 – 6.91 (m, 2H), 3.88 (s, 3H), 3.83 (s, 3H) ppm.

**<sup>13</sup>C NMR** (101 MHz, CDCl<sub>3</sub>): δ 159.5, 158.9, 149.8, 132.9, 129.6, 129.3, 128.3, 118.7, 114.2, 109.0, 56.0, 55.4 ppm.

**HRMS** (ESI-TOF) *m/z*: [M+H]<sup>+</sup> Calcd for C<sub>14</sub>H<sub>14</sub>NO<sub>4</sub><sup>+</sup> 260.0917; found 260.0908.

### 4'-methoxy-2-nitro-4-(trifluoromethyl)-1,1'-biphenyl (11)

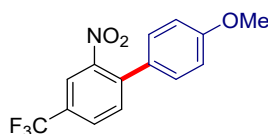

## SUPPORTING INFORMATION

Compound **11** was prepared following the procedure **A**, starting from 5-(4-methoxyphenyl)-5*H*-thianthren-5-ium trifluoromethanesulfonate (94.5 mg, 0.2 mmol) and potassium 2-nitro-4-(trifluoromethyl)benzoate (65.6 mg, 0.24 mmol). After column chromatography on silica (Petroleum Ether: EtOAc = 20:1), **11** was afforded as yellow solid (54.1 mg, 91%).

**M.P.:** 87 – 89 °C.

**<sup>1</sup>H NMR** (400 MHz, CDCl<sub>3</sub>): δ 8.06 (s, 1H), 7.90 – 7.78 (m, 1H), 7.59 (d, *J* = 8.1 Hz, 1H), 7.28 – 7.22 (m, 2H), 7.04 – 6.91 (m, 2H), 3.85 (s, 3H) ppm.

**<sup>13</sup>C NMR** (101 MHz, CDCl<sub>3</sub>): δ 160.3, 149.2, 139.3, 132.7, 130.2 (q, *J* = 34.3 Hz), 129.1, 128.6 (q, *J* = 3.6 Hz), 127.9, 122.9 (q, *J* = 272.9 Hz), 121.3 (q, *J* = 2.0 Hz), 114.5, 55.3 ppm.

**<sup>19</sup>F NMR** (377 MHz, CDCl<sub>3</sub>): δ – 62.7 ppm.

**HRMS** (ESI-TOF) *m/z*: [M+H]<sup>+</sup> Calcd for C<sub>14</sub>H<sub>11</sub>F<sub>3</sub>NO<sub>3</sub><sup>+</sup> 298.0686; found 298.0671.

### 4-fluoro-4'-methoxy-2-nitro-1,1'-biphenyl (**12**)

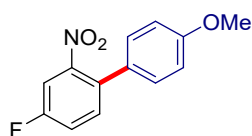

Compound **12** was prepared following the procedure **A**, starting from 5-(4-methoxyphenyl)-5*H*-thianthren-5-ium trifluoromethanesulfonate (94.5 mg, 0.2 mmol) and potassium 4-fluoro-2-nitrobenzoate (53.6 mg, 0.24 mmol). After column chromatography on silica (Petroleum Ether: EtOAc = 20:1), **12** was afforded as yellow solid (29.7 mg, 60%).

**M.P.:** 83 – 85 °C.

**<sup>1</sup>H NMR** (400 MHz, CDCl<sub>3</sub>): δ 7.59 – 7.52 (m, 1H), 7.44 – 7.40 (m, 1H), 7.36 – 7.27 (m, 1H), 7.24 – 7.19 (m, 2H), 6.98 – 6.93 (m, 2H), 3.84 (s, 3H) ppm.

**<sup>13</sup>C NMR** (101 MHz, CDCl<sub>3</sub>): δ 160.9 (d, *J* = 252.4 Hz), 159.7, 133.4 (d, *J* = 7.7 Hz), 132.1 (d, *J* = 3.8 Hz), 129.2, 128.5, 119.4 (d, *J* = 21.1 Hz), 114.2, 111.6 (d, *J* = 26.6 Hz), 55.3 ppm.

**<sup>19</sup>F NMR** (377 MHz, CDCl<sub>3</sub>): δ – 112.0 ppm.

**HRMS** (ESI-TOF) *m/z*: [M+H]<sup>+</sup> Calcd for C<sub>13</sub>H<sub>11</sub>FNO<sub>3</sub><sup>+</sup> 248.0717; found 248.0708.

### 4-(benzyloxy)-4',5-dimethoxy-2-nitro-1,1'-biphenyl (**13**)

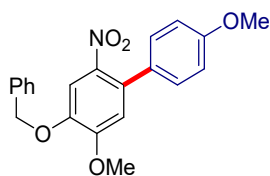

Compound **13** was prepared following the procedure **A**, starting from 5-(4-methoxyphenyl)-5*H*-thianthren-5-ium trifluoromethanesulfonate (94.5 mg, 0.2 mmol) and potassium 4-(benzyloxy)-5-methoxy-2-nitrobenzoate (81.9 mg, 0.24 mmol). After column chromatography on silica (Petroleum Ether: EtOAc = 15:1), **13** was afforded as brown solid (70.2 mg, 96%).

**M.P.:** 130 – 132 °C.

**<sup>1</sup>H NMR** (400 MHz, CDCl<sub>3</sub>): δ 7.58 (s, 1H), 7.52 – 7.45 (m, 2H), 7.44 – 7.39 (m, 2H), 7.38 – 7.33 (m, 1H), 7.25 – 7.19 (m, 2H), 6.99 – 6.91 (m, 2H), 6.79 (s, 1H), 5.21 (s, 2H), 3.94 (s, 3H), 3.84 (s, 3H) ppm.

**<sup>13</sup>C NMR** (101 MHz, CDCl<sub>3</sub>): δ 159.3, 152.7, 146.7, 140.9, 135.7, 131.2, 130.3, 129.1, 128.7, 128.7, 128.3, 127.5, 113.9, 109.9, 71.3, 56.3, 55.2 ppm.

**HRMS** (ESI-TOF) *m/z*: [M+H]<sup>+</sup> Calcd for C<sub>21</sub>H<sub>20</sub>NO<sub>5</sub><sup>+</sup> 366.1336; found 366.1332.

**2-fluoro-4'-methoxy-1,1'-biphenyl (14)**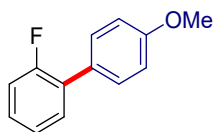

Compound **14** was prepared following the procedure **A**, starting from 5-(4-methoxyphenyl)-5*H*-thianthren-5-ium trifluoromethanesulfonate (94.5 mg, 0.2 mmol) and potassium 2-fluorobenzoate (42.8 mg, 0.24 mmol) with 0.1 mmol thianthrene, 10 mol% CuI and 10 mol% bpy at 160 °C. After column chromatography on silica (Petroleum Ether: EtOAc = 20:1), **14** was afforded as yellow oil liquid (25.1 mg, 62%).

**<sup>1</sup>H NMR** (400 MHz, CDCl<sub>3</sub>): δ 7.53 – 7.48 (m, 2H), 7.45 – 7.39 (m, 1H), 7.32 – 7.26 (m, 1H), 7.22 – 7.11 (m, 2H), 7.04 – 6.94 (m, 2H), 3.86 (s, 3H) ppm.

**<sup>13</sup>C NMR** (101 MHz, CDCl<sub>3</sub>): δ 159.7 (d, *J* = 248.3 Hz), 159.2, 130.5 (d, *J* = 3.6 Hz), 130.1 (d, *J* = 3.1 Hz), 128.7 (d, *J* = 13.3 Hz), 128.3 (d, *J* = 8.2 Hz), 128.2, 124.3 (d, *J* = 3.9 Hz), 116.0 (d, *J* = 23.2 Hz), 113.9, 55.3 ppm.

**<sup>19</sup>F NMR** (377 MHz, CDCl<sub>3</sub>): δ – 117.1 ppm.

**HRMS** (ESI-TOF) *m/z*: [M+H]<sup>+</sup> Calcd for C<sub>13</sub>H<sub>12</sub>FO<sup>+</sup> 203.0867; found 203.0858.

**methyl 4'-methoxy-[1,1'-biphenyl]-2-carboxylate (15)**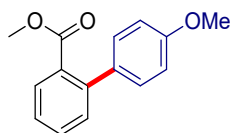

Compound **15** were prepared following the procedure **A**, starting from 5-(4-methoxyphenyl)-5*H*-thianthren-5-ium trifluoromethanesulfonate (94.5 mg, 0.2 mmol) and potassium 2-(methoxycarbonyl)benzoate (52.4 mg, 0.24 mmol) with 0.1 mmol thianthrene, 0.10 mmol CuCl, 10 mol% bpy at 160 °C. After column chromatography on silica (Petroleum Ether: EtOAc = 15:1), **15** was afforded as colorless oil liquid (25.1 mg, 52%).

**<sup>1</sup>H NMR** (400 MHz, CDCl<sub>3</sub>): δ 7.82 – 7.75 (m, 1H), 7.53 – 7.48 (m, 1H), 7.40 – 7.35 (m, 2H), 7.27 – 7.23 (m, 2H), 6.96 – 6.92 (m, 2H), 3.84 (s, 3H), 3.67 (s, 3H) ppm.

**<sup>13</sup>C NMR** (101 MHz, CDCl<sub>3</sub>): δ 169.3, 158.9, 142.0, 133.6, 131.1, 130.8, 130.7, 129.7, 129.4, 126.7, 113.5, 55.2, 51.9 ppm.

**HRMS** (ESI-TOF) *m/z*: [M+H]<sup>+</sup> Calcd for C<sub>15</sub>H<sub>15</sub>O<sub>3</sub><sup>+</sup> 243.1016; found 243.1015.

**1-(4'-methoxy-[1,1'-biphenyl]-2-yl)ethan-1-one (16)**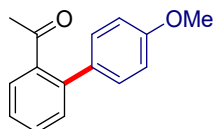

Compound **16** were prepared following the procedure **A**, starting from 5-(4-methoxyphenyl)-5*H*-thianthren-5-ium trifluoromethanesulfonate (94.5 mg, 0.2 mmol) and potassium 2-acetylbenzoate (48.6 mg, 0.24 mmol) with 0.1 mmol thianthrene, 0.10 mmol CuCl, 10 mol% bpy at 160 °C. After column chromatography on silica (Petroleum Ether: EtOAc = 15:1), **16** was afforded as yellow oil liquid (26.3 mg, 58%).

**<sup>1</sup>H NMR** (400 MHz, CDCl<sub>3</sub>): δ 7.54 – 7.47 (m, 2H), 7.42 – 7.35 (m, 2H), 7.29 – 7.25 (m, 2H), 7.01 – 6.91 (m, 2H), 3.86 (s, 3H), 2.02 (s, 3H) ppm.

**<sup>13</sup>C NMR** (101 MHz, CDCl<sub>3</sub>): δ 205.3, 159.5, 140.9, 140.1, 133.0, 130.6, 130.1, 130.0, 127.8, 127.0, 114.1, 55.3, 30.4 ppm.

**HRMS** (ESI-TOF) *m/z*: [M+H]<sup>+</sup> Calcd for C<sub>15</sub>H<sub>15</sub>O<sub>2</sub><sup>+</sup> 227.1067; found 227.1061.

**4'-methoxy-2-(trifluoromethyl)-1,1'-biphenyl (17)**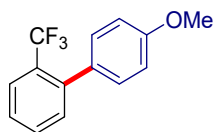

Compound **17** was prepared following the procedure **A**, starting from 5-(4-methoxyphenyl)-5*H*-thianthren-5-ium trifluoromethanesulfonate (94.5 mg, 0.2 mmol) and potassium 2-(trifluoromethyl)benzoate (54.8 mg, 0.24 mmol) with 5 mol% Pd(OAc)<sub>2</sub>, 0.10 mmol CuCl, 10 mol% bpy at 160 °C. After column chromatography on silica (Petroleum Ether: EtOAc = 15:1), **17** was afforded as yellow oil liquid (15.2 mg, 30%).

**<sup>1</sup>H NMR** (400 MHz, CDCl<sub>3</sub>): δ 7.74 (d, *J* = 7.9 Hz, 1H), 7.59 – 7.51 (m, 1H), 7.49 – 7.40 (m, 1H), 7.33 (d, *J* = 7.6 Hz, 1H), 7.29 – 7.25 (m, 2H), 7.00 – 6.89 (m, 2H), 3.86 (s, 3H) ppm.

**<sup>13</sup>C NMR** (101 MHz, CDCl<sub>3</sub>): δ 159.1, 141.2, 132.3, 132.2, 131.2, 130.1 (q, *J* = 1.5 Hz), 128.6 (q, *J* = 29.3 Hz), 127.1, 126.0 (q, *J* = 6.1 Hz), 124.2 (q, *J* = 275.5 Hz), 113.2, 55.2 ppm.

**<sup>19</sup>F NMR** (377 MHz, CDCl<sub>3</sub>): δ – 56.9 ppm.

**HRMS** (ESI-TOF) *m/z*: [M+H]<sup>+</sup> Calcd for C<sub>14</sub>H<sub>12</sub>F<sub>3</sub>O<sup>+</sup> 253.0835; found 253.0833.

**4'-methoxy-2-(methylsulfonyl)-1,1'-biphenyl (18)**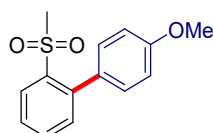

Compound **18** was prepared following the procedure **E**, starting from 5-(4-methoxyphenyl)-5*H*-thianthren-5-ium trifluoromethanesulfonate (94.5 mg, 0.2 mmol) and potassium 2-(methylsulfonyl)benzoate (57.2 mg, 0.24 mmol) with 5 mol% Pd(OAc)<sub>2</sub>, 0.10 mmol CuCl, 10 mol% bpy at 160 °C. After column chromatography on silica (Petroleum Ether: EtOAc = 7:1), **18** was afforded as yellow waxy liquid (27.3 mg, 52%).

**<sup>1</sup>H NMR** (400 MHz, CDCl<sub>3</sub>): δ 8.28 – 8.16 (m, 1H), 7.65 – 7.60 (m, 1H), 7.56 – 7.50 (m, 1H), 7.44 – 7.38 (m, 2H), 7.38 – 7.34 (m, 1H), 7.00 – 6.95 (m, 2H), 3.86 (s, 3H), 2.62 (s, 3H) ppm.

**<sup>13</sup>C NMR** (101 MHz, CDCl<sub>3</sub>): δ 159.7, 141.2, 139.4, 133.0, 132.9, 131.4, 130.5, 128.2, 127.6, 113.4, 55.3, 43.1 ppm.

**HRMS** (ESI-TOF) *m/z*: [M+H]<sup>+</sup> Calcd for C<sub>14</sub>H<sub>15</sub>O<sub>3</sub>S<sup>+</sup> 263.0736; found 263.0724.

**2-fluoro-4'-methoxy-[1,1'-biphenyl]-4-carbonitrile (19)**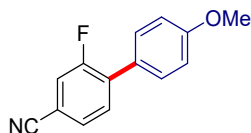

Compound **19** was prepared following the procedure **A**, starting from 5-(4-methoxyphenyl)-5*H*-thianthren-5-ium trifluoromethanesulfonate (94.5 mg, 0.2 mmol) and potassium 4-cyano-2-fluorobenzoate (48.8 mg, 0.24 mmol) with 0.1 mmol thianthrene, 10 mol% CuI and 10 mol% bpy at 160 °C. After column chromatography on silica (Petroleum Ether: EtOAc = 10:1), **19** was afforded as white solid (29.9 mg, 66%).

**M.P.:** 79 – 81 °C.

**<sup>1</sup>H NMR** (400 MHz, CDCl<sub>3</sub>): δ 7.57 – 7.46 (m, 4H), 7.45 – 7.38 (m, 1H), 7.05 – 6.95 (m, 2H), 3.85 (s, 3H) ppm.

**<sup>13</sup>C NMR** (101 MHz, CDCl<sub>3</sub>): δ 160.2, 159.0 (d, *J* = 251.9 Hz), 133.9 (d, *J* = 13.1 Hz), 131.2 (d, *J* = 5.1 Hz), 130.2 (d, *J* = 3.9 Hz), 128.3 (d, *J* = 3.9 Hz), 126.0, 119.8 (d, *J* = 26.6 Hz), 117.7 (d, *J* = 3.1 Hz), 114.2, 111.4 (d, *J* = 9.9 Hz), 55.3 ppm.

## SUPPORTING INFORMATION

**<sup>19</sup>F NMR** (377 MHz, CDCl<sub>3</sub>): δ – 114.9 ppm.

**HRMS** (ESI-TOF) m/z: [M+H]<sup>+</sup> Calcd for C<sub>14</sub>H<sub>11</sub>FNO<sup>+</sup> 228.0819; found 228.0817.

### 2-(4-methoxyphenyl)-1-methyl-1H-indole (20)

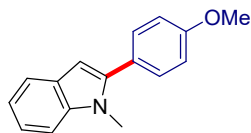

Compound **20** was prepared following the procedure **A**, starting from 5-(4-methoxyphenyl)-5*H*-thianthren-5-ium trifluoromethanesulfonate (94.5 mg, 0.2 mmol) and potassium 1-methyl-1*H*-indole-2-carboxylate (51.2mg, 0.24 mmol). After column chromatography on silica (Petroleum Ether: EtOAc = 10:1), **20** was afforded as brown solid (24.2mg, 51%).

**M.P.:** 96 – 100 °C.

**<sup>1</sup>H NMR** (400 MHz, CDCl<sub>3</sub>): δ 7.72 – 7.60 (m, 1H), 7.50 – 7.42 (m, 2H), 7.40 – 7.35 (m, 1H), 7.28 – 7.24 (m, 1H), 7.20 – 7.14 (m, 1H), 7.07 – 7.00 (m, 2H), 6.59 – 6.48 (m, 1H), 3.89 (s, 3H), 3.75 (s, 3H) ppm.

**<sup>13</sup>C NMR** (101 MHz, CDCl<sub>3</sub>): δ 159.4, 141.4, 138.1, 130.6, 128.0, 125.2, 121.4, 120.2, 119.7, 113.9, 109.5, 101.0, 55.3, 31.0 ppm.

**HRMS** (ESI-TOF) m/z: [M+H]<sup>+</sup> Calcd for C<sub>16</sub>H<sub>16</sub>NO<sup>+</sup> 238.1226; found 238.1220.

### 2-(4-methoxyphenyl)thiophene (21)

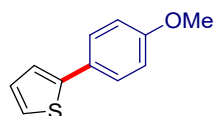

Compound **21** was prepared following the procedure **A**, starting from 5-(4-methoxyphenyl)-5*H*-thianthren-5-ium trifluoromethanesulfonate (94.5 mg, 0.2 mmol) and potassium thiophene-2-carboxylate (39.9 mg, 0.24 mmol) ) with 0.1 mmol thianthrene, 10 mol% CuI and 10 mol% bpy at 160 °C. After column chromatography on silica (Petroleum Ether: EtOAc = 10:1), **21** was afforded as white solid (26.7mg, 70%).

**M.P.:** 99 – 102 °C.

**<sup>1</sup>H NMR** (400 MHz, CDCl<sub>3</sub>): δ 7.60 – 7.49 (m, 2H), 7.25 – 7.18 (m, 2H), 7.09 – 7.03 (m, 1H), 6.97 – 6.89 (m, 2H), 3.84 (s, 3H) ppm.

**<sup>13</sup>C NMR** (101 MHz, CDCl<sub>3</sub>): δ 159.2, 144.3, 127.9, 127.3, 127.2, 123.8, 122.1, 114.2, 55.3 ppm.

**HRMS** (ESI-TOF) m/z: [M+H]<sup>+</sup> Calcd for C<sub>11</sub>H<sub>11</sub>OS<sup>+</sup> 191.0525; found 191.0519.

### 4'-methoxy-3-nitro-1,1'-biphenyl (22)

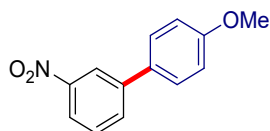

Compound **22** was prepared following the procedure **A**, starting from 5-(4-methoxyphenyl)-5*H*-thianthren-5-ium trifluoromethanesulfonate (94.5 mg, 0.2 mmol) and potassium 3-nitrobenzoate (49.2 mg, 0.24 mmol) with 5 mol% Pd(OAc)<sub>2</sub>, 5 mol% Cu<sub>2</sub>O, and 10 mol% Me<sub>4</sub>Phen, and 10 mol% XPhos in NMP/quinoline (1:1) at 180 °C. After column chromatography on silica (Petroleum Ether: EtOAc = 10:1), **22** was afforded as light yellow crystal (14.3mg, 31%).

**M.P.:** 79-81 °C

## SUPPORTING INFORMATION

**<sup>1</sup>H NMR** (400 MHz, CDCl<sub>3</sub>): δ 8.38 (t, *J* = 2.1 Hz, 1H), 8.18 – 8.08 (m, 1H), 7.88 – 7.84 (m, 1H), 7.58 – 7.53 (m, 3H), 7.03 – 6.99 (m, 2H), 3.86 (s, 3H) ppm.

Spectra data are consistent with the reported literature.<sup>3</sup>

### 4-methoxy-4'-nitro-1,1'-biphenyl (23)

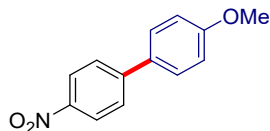

Compound **23** was prepared following the procedure **A**, starting from 5-(4-methoxyphenyl)-5*H*-thianthren-5-ium trifluoromethanesulfonate (94.5 mg, 0.2 mmol) and potassium 4-nitrobenzoate (49.2 mg, 0.24 mmol) with 5 mol% Pd(OAc)<sub>2</sub>, 5 mol% Cu<sub>2</sub>O, and 10 mol% Me<sub>4</sub>Phen, and 10 mol% XPhos in NMP/quinoline (1:1) at 180 °C. After column chromatography on silica (Petroleum Ether: EtOAc = 15:1), **23** was afforded as light yellow crystal (11.9 mg, 26%).

**M.P.:** 105-107 °C

**<sup>1</sup>H NMR** (400 MHz, CDCl<sub>3</sub>): δ 8.30 – 8.19 (m, 2H), 7.72 – 7.64 (m, 2H), 7.61 – 7.55 (m, 2H), 7.06 – 6.98 (m, 2H), 3.90 – 3.84 (m, 3H) ppm.

**<sup>13</sup>C NMR** (101 MHz, CDCl<sub>3</sub>): δ 160.3, 147.1, 146.4, 130.9, 128.5, 126.9, 124.0, 114.5, 55.3 ppm.

**HRMS** (ESI-TOF) *m/z*: [M+Na]<sup>+</sup> Calcd for C<sub>13</sub>H<sub>11</sub>NO<sub>3</sub>Na<sup>+</sup> 252.0631; found 252.0628.

### 2-nitro-1,1'-biphenyl (24)

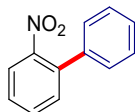

Compound **24** was prepared following the procedure **A**, starting from 5-phenyl-5*H*-thianthren-5-ium trifluoromethanesulfonate (88.5 mg, 0.2 mmol) and potassium 2-nitrobenzoate (49.2 mg, 0.24 mmol). After column chromatography on silica (Petroleum Ether: EtOAc = 12:1), **24** was afforded as yellow oil liquid (33.9 mg, 85%).

**<sup>1</sup>H NMR** (400 MHz, CDCl<sub>3</sub>): δ 7.89 – 7.81 (m, 1H), 7.64 – 7.59 (m, 1H), 7.50 – 7.40 (m, 5H), 7.35 – 7.31 (m, 2H) ppm.

**<sup>13</sup>C NMR** (101 MHz, CDCl<sub>3</sub>): δ 149.2, 137.3, 136.3, 132.2, 131.9, 128.6, 128.2, 128.1, 127.8, 124.0 ppm.

**HRMS** (ESI-TOF) *m/z*: [M+H]<sup>+</sup> Calcd for C<sub>12</sub>H<sub>10</sub>NO<sub>2</sub><sup>+</sup> 200.0706; found 200.0706.

### 4'-methyl-2-nitro-1,1'-biphenyl (25)

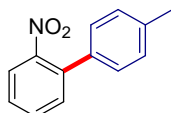

Compound **25** was prepared following the procedure **A**, starting from 5-(*p*-tolyl)-5*H*-thianthren-5-ium trifluoromethanesulfonate (91.3 mg, 0.2 mmol) and potassium 2-nitrobenzoate (49.2 mg, 0.24 mmol). After column chromatography on silica (Petroleum Ether: EtOAc = 15:1), **25** was afforded as yellow oil liquid (40.5 mg, 95%).

**<sup>1</sup>H NMR** (400 MHz, CDCl<sub>3</sub>): δ 7.86 – 7.80 (m, 1H), 7.63 – 7.57 (m, 1H), 7.49 – 7.42 (m, 2H), 7.28 – 7.21 (m, 4H), 2.41 (s, 3H) ppm.

**<sup>13</sup>C NMR** (101 MHz, CDCl<sub>3</sub>): δ 149.3, 138.1, 136.2, 134.3, 132.1, 131.9, 129.4, 127.8, 127.7, 123.9, 21.2 ppm.

**HRMS** (ESI-TOF) *m/z*: [M+H]<sup>+</sup> Calcd for C<sub>13</sub>H<sub>12</sub>NO<sub>2</sub><sup>+</sup> 214.0863; found 214.0857.

**6-(2-nitrophenyl)-1,2,3,4-tetrahydronaphthalene (26)**

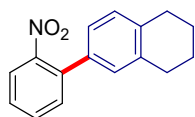

Compound **26** was prepared following the procedure **A**, starting from 5-(5,6,7,8-tetrahydronaphthalen-2-yl)-5H-thianthren-5-ium trifluoromethanesulfonate (99.3 mg, 0.2 mmol) and potassium 2-nitrobenzoate (49.2 mg, 0.24 mmol). After column chromatography on silica (Petroleum Ether: EtOAc = 15:1), **26** was afforded as yellow oil liquid (38.5 mg, 76%).

**<sup>1</sup>H NMR** (400 MHz, CDCl<sub>3</sub>): δ 7.86 – 7.77 (m, 1H), 7.63 – 7.55 (m, 1H), 7.49 – 7.40 (m, 2H), 7.16 – 7.09 (m, 1H), 7.09 – 7.00 (m, 2H), 2.85 – 2.77 (m, 4H), 1.87 – 1.80 (m, 4H) ppm.

**<sup>13</sup>C NMR** (101 MHz, CDCl<sub>3</sub>): δ 149.4, 137.6, 137.4, 136.4, 134.3, 132.1, 131.9, 129.4, 128.4, 127.7, 124.9, 123.9, 29.3, 29.1, 23.0 ppm.

**HRMS** (ESI-TOF) *m/z*: [M+H]<sup>+</sup> Calcd for C<sub>16</sub>H<sub>16</sub>NO<sub>2</sub><sup>+</sup> 254.1176; found 254.1174.

**4'-(tert-butyl)-2-nitro-1,1'-biphenyl (27)**

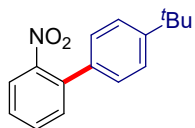

Compound **27** was prepared following the procedure **A**, starting from 5-(4-(tert-butyl)phenyl)-5H-thianthren-5-ium trifluoromethanesulfonate (99.7 mg, 0.2 mmol) and potassium 2-nitrobenzoate (49.2 mg, 0.24 mmol). After column chromatography on silica (Petroleum Ether: EtOAc = 15:1), **27** was afforded as yellow oil liquid (43.9 mg, 86%).

**<sup>1</sup>H NMR** (400 MHz, CDCl<sub>3</sub>): δ 7.86 – 7.76 (m, 1H), 7.64 – 7.55 (m, 1H), 7.51 – 7.39 (m, 4H), 7.31 – 7.25 (m, 2H), 1.41 – 1.32 (m, 9H) ppm.

**<sup>13</sup>C NMR** (101 MHz, CDCl<sub>3</sub>): δ 151.2, 149.4, 136.1, 134.2, 132.1, 131.9, 127.8, 127.5, 125.6, 123.9, 34.6, 31.3 ppm.

**HRMS** (ESI-TOF) *m/z*: [M+H]<sup>+</sup> Calcd for C<sub>16</sub>H<sub>18</sub>NO<sub>2</sub><sup>+</sup> 256.1332; found 256.1332.

**2-nitro-4'-phenoxy-1,1'-biphenyl (28)**

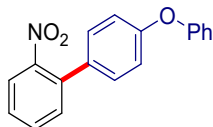

Compound **28** was prepared following the procedure **A**, starting from 5-(4-phenoxyphenyl)-5H-thianthren-5-ium trifluoromethanesulfonate (106.9 mg, 0.2 mmol) and potassium 2-nitrobenzoate (49.2 mg, 0.24 mmol). After column chromatography on silica (Petroleum Ether: EtOAc = 10:1), **28** was afforded as yellow oil liquid (40.8 mg, 70%).

**<sup>1</sup>H NMR** (400 MHz, CDCl<sub>3</sub>): δ 7.87 – 7.79 (m, 1H), 7.64 – 7.58 (m, 1H), 7.51 – 7.43 (m, 2H), 7.41 – 7.33 (m, 2H), 7.31 – 7.24 (m, 2H), 7.18 – 7.12 (m, 1H), 7.11 – 6.99 (m, 4H) ppm.

**<sup>13</sup>C NMR** (101 MHz, CDCl<sub>3</sub>): δ 157.7, 156.5, 149.3, 135.6, 132.2, 131.9, 131.9, 129.8, 129.3, 128.0, 124.0, 123.8, 119.4, 118.5 ppm.

**HRMS** (ESI-TOF) *m/z*: [M+H]<sup>+</sup> Calcd for C<sub>18</sub>H<sub>14</sub>NO<sub>3</sub><sup>+</sup> 292.0968; found 292.0964.

**2-nitro-1,1':4',1''-terphenyl (29)**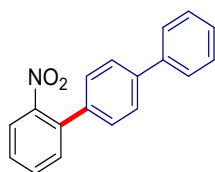

Compound **29** was prepared following the procedure **A**, starting from 5-([1,1'-biphenyl]-4-yl)-5H-thianthren-5-ium trifluoromethanesulfonate (103.7 mg, 0.2 mmol) and potassium 2-nitrobenzoate (49.2 mg, 0.24 mmol). After column chromatography on silica (Petroleum Ether: EtOAc = 10:1), **29** was afforded as yellow solid (49.6 mg, 90%).

**M.P.:** 120 – 123 °C.

**<sup>1</sup>H NMR** (400 MHz, CDCl<sub>3</sub>): δ 7.93 – 7.86 (m, 1H), 7.69 – 7.62 (m, 5H), 7.53 – 7.45 (m, 4H), 7.45 – 7.35 (m, 3H) ppm.

**<sup>13</sup>C NMR** (101 MHz, CDCl<sub>3</sub>): δ 149.3, 141.1, 140.3, 136.2, 135.9, 132.3, 131.9, 128.8, 128.3, 128.2, 127.6, 127.4, 127.1, 124.1 ppm.

**HRMS** (ESI-TOF) m/z: [M+H]<sup>+</sup> Calcd for C<sub>18</sub>H<sub>14</sub>NO<sub>2</sub><sup>+</sup> 276.1019; found 276.1015.

**4''-fluoro-2-nitro-1,1':4',1''-terphenyl (30)**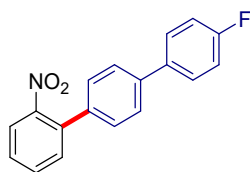

Compound **30** was prepared following the procedure **A**, starting from 5-(4'-fluoro-[1,1'-biphenyl]-4-yl)-5H-thianthren-5-ium trifluoromethanesulfonate (107.3 mg, 0.2 mmol) and potassium 2-nitrobenzoate (49.2 mg, 0.24 mmol). After column chromatography on silica (Petroleum Ether: EtOAc = 15:1), **30** was afforded as yellow solid (49.3 mg, 84%).

**M.P.:** 96 - 98 °C.

**<sup>1</sup>H NMR** (400 MHz, CDCl<sub>3</sub>): δ 7.91 – 7.84 (m, 1H), 7.66 – 7.56 (m, 5H), 7.52 – 7.46 (m, 2H), 7.42 – 7.37 (m, 2H), 7.18 – 7.11 (m, 2H) ppm.

**<sup>13</sup>C NMR** (101 MHz, CDCl<sub>3</sub>): δ 162.6 (d, *J* = 247.5 Hz), 149.2, 140.0, 136.4 (d, *J* = 3.9 Hz), 136.3, 135.8, 132.3, 131.9, 128.7 (d, *J* = 8.2 Hz), 128.4, 128.2, 127.2, 124.1, 115.7 (d, *J* = 21.6 Hz) ppm.

**<sup>19</sup>F NMR** (377 MHz, CDCl<sub>3</sub>): δ – 115.2 ppm.

**HRMS** (ESI-TOF) m/z: [M+H]<sup>+</sup> Calcd for C<sub>18</sub>H<sub>13</sub>FNO<sub>2</sub><sup>+</sup> 294.0925; found 294.0919.

**2''-nitro-[1,1':4',1''-terphenyl]-4-carbonitrile (31)**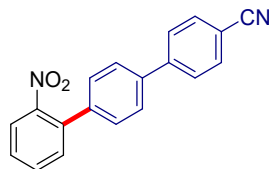

Compound **31** was prepared following the procedure **A**, starting from 5-(4'-cyano-[1,1'-biphenyl]-4-yl)-5H-thianthren-5-ium trifluoromethanesulfonate (108.7 mg, 0.2 mmol) and potassium 2-nitrobenzoate (49.2 mg, 0.24 mmol). After column chromatography on silica (Petroleum Ether: EtOAc = 7:1), **31** was afforded as yellow solid (31.2 mg, 52%).

## SUPPORTING INFORMATION

**M.P.:** 125 – 128 °C.

**<sup>1</sup>H NMR** (400 MHz, CDCl<sub>3</sub>): δ 7.94 – 7.87 (m, 1H), 7.76 – 7.69 (m, 4H), 7.69 – 7.61 (m, 3H), 7.57 – 7.40 (m, 4H) ppm.

**<sup>13</sup>C NMR** (101 MHz, CDCl<sub>3</sub>): δ 149.0, 144.7, 138.8, 137.8, 135.5, 132.6, 132.5, 131.8, 128.6, 128.5, 127.6, 127.4, 124.2, 118.8, 111.1 ppm.

**HRMS** (ESI-TOF) m/z: [M+H]<sup>+</sup> Calcd for C<sub>19</sub>H<sub>13</sub>N<sub>2</sub>O<sub>2</sub><sup>+</sup> 301.0972; found 301.0968.

### 2''-nitro-[1,1':4',1''-terphenyl]-4-carbaldehyde (**32**)

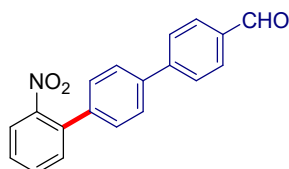

Compound **32** was prepared following the procedure **A**, starting from 5-(4'-formyl-[1,1'-biphenyl]-4-yl)-5H-thianthren-5-ium trifluoromethanesulfonate (109.3 mg, 0.2 mmol) and potassium 2-nitrobenzoate (49.2 mg, 0.24 mmol). After column chromatography on silica (Petroleum Ether: EtOAc = 10:1), **32** was afforded as yellow solid (51.6 mg, 85%).

**M.P.:** 113 – 116 °C.

**<sup>1</sup>H NMR** (400 MHz, CDCl<sub>3</sub>): δ 10.08 – 10.02 (m, 1H), 8.01 – 7.85 (m, 3H), 7.81 – 7.74 (m, 2H), 7.72 – 7.66 (m, 2H), 7.66 – 7.61 (m, 1H), 7.55 – 7.46 (m, 2H), 7.46 – 7.40 (m, 2H) ppm.

**<sup>13</sup>C NMR** (101 MHz, CDCl<sub>3</sub>): δ 191.8, 149.1, 146.2, 139.4, 137.6, 135.6, 135.3, 132.4, 131.8, 130.3, 128.5, 128.4, 127.6, 127.6, 124.2 ppm.

**HRMS** (ESI-TOF) m/z: [M+H]<sup>+</sup> Calcd for C<sub>19</sub>H<sub>14</sub>NO<sub>3</sub><sup>+</sup> 304.0968; found 304.0966.

### 3',4'-dimethyl-2-nitro-1,1'-biphenyl (**33**)

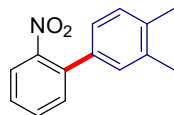

Compound **33** was prepared following the procedure **A**, starting from 5-(3,4-dimethylphenyl)-5H-thianthren-5-ium trifluoromethanesulfonate (94.1 mg, 0.2 mmol) and potassium 2-nitrobenzoate (49.2 mg, 0.24 mmol). After column chromatography on silica (Petroleum Ether: EtOAc = 15:1), **33** was afforded as yellow solid (31.4 mg, 69%).

**M.P.:** 40 – 43 °C.

**<sup>1</sup>H NMR** (400 MHz, CDCl<sub>3</sub>): δ 7.87 – 7.78 (m, 1H), 7.63 – 7.57 (m, 1H), 7.49 – 7.42 (m, 2H), 7.21 (d, *J* = 7.7 Hz, 1H), 7.16 – 7.11 (m, 1H), 7.11 – 7.06 (m, 1H), 2.32 (d, *J* = 3.3 Hz, 6H) ppm.

**<sup>13</sup>C NMR** (101 MHz, CDCl<sub>3</sub>): δ 149.3, 136.9, 136.8, 136.2, 134.7, 132.1, 131.9, 129.9, 128.9, 127.7, 125.2, 123.9, 19.8, 19.5 ppm.

**HRMS** (ESI-TOF) m/z: [M+H]<sup>+</sup> Calcd for C<sub>14</sub>H<sub>14</sub>NO<sub>2</sub><sup>+</sup> 228.1019; found 228.1015.

### 3'-fluoro-4'-methyl-2-nitro-1,1'-biphenyl (**34**)

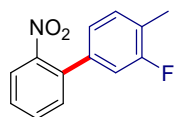

## SUPPORTING INFORMATION

Compound **34** was prepared following the procedure **A**, starting from 5-(3-fluoro-4-methylphenyl)-5H-thianthren-5-ium trifluoromethanesulfonate (94.9 mg, 0.2 mmol) and potassium 2-nitrobenzoate (49.2 mg, 0.24 mmol). After column chromatography on silica (Petroleum Ether: EtOAc = 15:1), **34** was afforded as yellow oil liquid (30.1 mg, 65%).

**<sup>1</sup>H NMR** (400 MHz, CDCl<sub>3</sub>): δ 7.89 – 7.78 (m, 1H), 7.63 – 7.58 (m, 1H), 7.50 – 7.45 (m, 1H), 7.43 – 7.39 (m, 1H), 7.17 – 7.02 (m, 3H), 2.32 – 2.29 (m, 3H) ppm.

**<sup>13</sup>C NMR** (101 MHz, CDCl<sub>3</sub>): δ 161.3 (d, *J* = 247.5 Hz), 149.2, 135.4, 133.0 (d, *J* = 4.0 Hz), 132.2, 131.9, 131.0 (d, *J* = 6.6 Hz), 128.1, 126.8 (d, *J* = 8.2 Hz), 125.3 (d, *J* = 17.9 Hz), 124.0, 115.4 (d, *J* = 23.3 Hz), 14.5 (d, *J* = 3.1 Hz) ppm.

**<sup>19</sup>F NMR** (377 MHz, CDCl<sub>3</sub>): δ – 134.5 ppm.

**HRMS** (ESI-TOF) *m/z*: [M+H]<sup>+</sup> Calcd for C<sub>13</sub>H<sub>11</sub>FNO<sub>2</sub><sup>+</sup> 232.0768; found 232.0762.

### methyl 4-methyl-2'-nitro-[1,1'-biphenyl]-3-carboxylate (**35**)

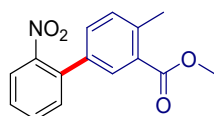

Compound **35** was prepared following the procedure **A**, starting from 5-(3-(methoxycarbonyl)-4-methylphenyl)-5H-thianthren-5-ium trifluoromethanesulfonate (103.0 mg, 0.2 mmol) and potassium 2-nitrobenzoate (49.2 mg, 0.24 mmol). After column chromatography on silica (Petroleum Ether: EtOAc = 10:1), **35** was afforded as colorless solid (33.6 mg, 62%).

**M.P.:** 70 – 72 °C.

**<sup>1</sup>H NMR** (400 MHz, CDCl<sub>3</sub>): δ 7.93 – 7.85 (m, 2H), 7.65 – 7.59 (m, 1H), 7.52 – 7.46 (m, 1H), 7.45 – 7.41 (m, 1H), 7.35 – 7.28 (m, 2H), 3.88 (s, 3H), 2.64 (s, 3H) ppm.

**<sup>13</sup>C NMR** (101 MHz, CDCl<sub>3</sub>): δ 167.40 149.0 140.4, 135.4, 135.0, 132.5, 132.1, 132.0, 131.2, 130.1, 129.8, 128.4, 124.2, 51.9, 21.5 ppm.

**HRMS** (ESI-TOF) *m/z*: [M+H]<sup>+</sup> Calcd for C<sub>15</sub>H<sub>14</sub>NO<sub>4</sub><sup>+</sup> 272.0917; found 272.0917.

### 3'-fluoro-4'-methoxy-2-nitro-1,1'-biphenyl (**36**)

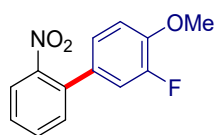

Compound **36** was prepared following the procedure **A**, starting from 5-(3-fluoro-4-methoxyphenyl)-5H-thianthren-5-ium trifluoromethanesulfonate (98.1mg, 0.2 mmol) and potassium 2-nitrobenzoate (49.2 mg, 0.24 mmol). After column chromatography on silica (Petroleum Ether: EtOAc = 15:1), **36** was afforded as yellow solid (24.7 mg, 50%).

**M.P.:** 94 – 96 °C.

**<sup>1</sup>H NMR** (400 MHz, CDCl<sub>3</sub>): δ 7.86 – 7.80 (m, 1H), 7.63 – 7.58 (m, 1H), 7.50 – 7.45 (m, 1H), 7.43 – 7.39 (m, 1H), 7.11 – 7.06 (m, 1H), 7.04 – 6.97 (m, 2H), 3.92 (s, 3H) ppm.

**<sup>13</sup>C NMR** (101 MHz, CDCl<sub>3</sub>): δ 152.1 (d, *J* = 248.5 Hz), 149.2, 147.7 (d, *J* = 10.1 Hz), 134.7, 132.3, 131.8, 130.0 (d, *J* = 8.2 Hz), 128.2, 124.1, 123.9 (d, *J* = 3.9 Hz), 115.9 (d, *J* = 19.2 Hz), 113.4 (d, *J* = 3.0 Hz), 56.2 ppm.

**<sup>19</sup>F NMR** (377 MHz, CDCl<sub>3</sub>): δ – 134.1 ppm.

**HRMS** (ESI-TOF) *m/z*: [M+H]<sup>+</sup> Calcd for C<sub>13</sub>H<sub>11</sub>FNO<sub>3</sub><sup>+</sup> 248.0717; found 248.0713.

**4'-methoxy-3',5'-dimethyl-2-nitro-1,1'-biphenyl (37)**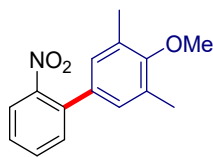

Compound **37** was prepared following the procedure **A**, starting from 5-(4-methoxy-3,5-dimethylphenyl)-5H-thianthren-5-ium trifluoromethanesulfonate (100.1 mg, 0.2 mmol) and potassium 2-nitrobenzoate (49.2 mg, 0.24 mmol). After column chromatography on silica (Petroleum Ether: EtOAc = 10:1), **37** was afforded as yellow oil liquid (42.7mg, 83%).

**<sup>1</sup>H NMR** (400 MHz, CDCl<sub>3</sub>): δ 7.79 (d, *J* = 9.2 Hz, 1H), 7.59 – 7.55 (m, 1H), 7.46 – 7.40 (m, 2H), 6.97 (s, 2H), 3.76 (s, 3H), 2.31 (s, 6H) ppm.

**<sup>13</sup>C NMR** (101 MHz, CDCl<sub>3</sub>): δ 157.1, 149.3, 136.0, 132.6, 132.0, 131.9, 131.2, 128.2, 127.7, 123.8, 59.7, 16.1 ppm.

**HRMS** (ESI-TOF) *m/z*: [M+H]<sup>+</sup> Calcd for C<sub>15</sub>H<sub>16</sub>NO<sub>3</sub><sup>+</sup> 258.1225; found 258.1225.

**methyl 7-(2-nitrophenyl)-2,3-dihydrobenzo[b][1,4]dioxine-5-carboxylate (38)**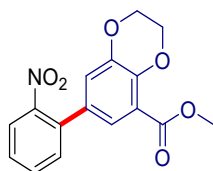

Compound **38** was prepared following the procedure **A**, starting from 5-(8-(methoxycarbonyl)-2,3-dihydrobenzo[b][1,4]dioxin-6-yl)-5H-thianthren-5-ium trifluoromethanesulfonate (111.7 mg, 0.2 mmol) and potassium 2-nitrobenzoate (49.2 mg, 0.24 mmol). After column chromatography on silica (Petroleum Ether: EtOAc = 10:1), **38** was afforded as yellow solid (32.8 mg, 52%).

**M.P.:** 126 – 129 °C.

**<sup>1</sup>H NMR** (400 MHz, CDCl<sub>3</sub>): δ 7.83 (d, *J* = 8.1 Hz, 1H), 7.60 – 7.56 (m, 1H), 7.48 – 7.43 (m, 1H), 7.41 – 7.38 (m, 1H), 7.38 – 7.34 (m, 1H), 6.99 – 6.93 (m, 1H), 4.40 – 4.37 (m, 2H), 4.32 – 4.28 (m, 2H), 3.86 (s, 3H) ppm.

**<sup>13</sup>C NMR** (101 MHz, CDCl<sub>3</sub>): δ 165.4, 148.9, 144.2, 144.1, 134.7, 132.3, 131.8, 129.6, 128.3, 124.1, 123.2, 120.6, 120.0, 64.6, 63.8, 52.1 ppm.

**HRMS** (ESI-TOF) *m/z*: [M+H]<sup>+</sup> Calcd for C<sub>16</sub>H<sub>14</sub>NO<sub>6</sub><sup>+</sup> 316.0816; found 316.0812.

**4-((2'-nitro-[1,1'-biphenyl]-4-yl)oxy)benzonitrile (39)**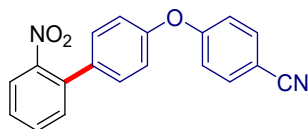

Compound **39** was prepared following the procedure **A**, starting from 5-(4-(4-cyanophenoxy)phenyl)-5H-thianthren-5-ium trifluoromethanesulfonate (111.9 mg, 0.2 mmol) and potassium 2-nitrobenzoate (49.2 mg, 0.24 mmol). After column chromatography on silica (Petroleum Ether: EtOAc = 10:1), **39** was afforded as white solid (52.5 mg, 83%).

**M.P.:** 146 – 150 °C.

**<sup>1</sup>H NMR** (400 MHz, CDCl<sub>3</sub>): δ 7.91 – 7.86 (m, 1H), 7.67 – 7.61 (m, 3H), 7.55 – 7.49 (m, 1H), 7.48 – 7.43 (m, 1H), 7.39 – 7.33 (m, 2H), 7.15 – 7.04 (m, 4H) ppm.

## SUPPORTING INFORMATION

**<sup>13</sup>C NMR** (101 MHz, CDCl<sub>3</sub>): δ 161.0, 155.0, 149.2, 135.3, 134.2, 133.4, 132.4, 131.8, 129.8, 128.4, 124.2, 120.3, 118.7, 118.3, 106.3 ppm.

**HRMS** (ESI-TOF) m/z: [M+H]<sup>+</sup> Calcd for C<sub>19</sub>H<sub>13</sub>N<sub>2</sub>O<sub>3</sub><sup>+</sup> 317.0921; found 317.0917.

### 2-(2-nitrophenyl)-9H-xanthen-9-one (40)

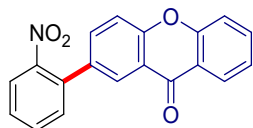

Compound **40** was prepared following the procedure **A**, starting from 5-(9-oxo-9H-xanthen-2-yl)-5H-thianthren-5-ium trifluoromethanesulfonate (112.1 mg, 0.2 mmol) and potassium 2-nitrobenzoate (49.2 mg, 0.24 mmol). After column chromatography on silica (Petroleum Ether: EtOAc = 7:1), **40** was afforded as white solid (58.4 mg, 92%).

**M.P.:** 195 – 198 °C.

**<sup>1</sup>H NMR** (400 MHz, CDCl<sub>3</sub>): δ 8.38 – 8.27 (m, 2H), 7.98 – 7.93 (m, 1H), 7.76 – 7.71 (m, 1H), 7.69 – 7.61 (m, 2H), 7.57 – 7.47 (m, 4H), 7.42 – 7.36 (m, 1H) ppm.

**<sup>13</sup>C NMR** (101 MHz, CDCl<sub>3</sub>): δ 176.8, 156.1, 155.8, 148.8, 135.0, 135.0, 134.4, 133.5, 132.7, 132.3, 128.7, 126.7, 126.0, 124.5, 124.1, 121.8, 121.7, 118.4, 118.0 ppm.

**HRMS** (ESI-TOF) m/z: [M+H]<sup>+</sup> Calcd for C<sub>19</sub>H<sub>12</sub>NO<sub>4</sub><sup>+</sup> 318.0761; found 318.0761.

### 2-(2-nitrophenyl)dibenzo[b,d]furan (41)

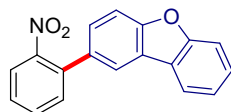

Compound **41** was prepared following the procedure **A**, starting from 5-(dibenzo[b,d]furan-2-yl)-5H-thianthren-5-ium trifluoromethanesulfonate (106.5 mg, 0.2 mmol) and potassium 2-nitrobenzoate (49.2 mg, 0.24 mmol). After column chromatography on silica (Petroleum Ether: EtOAc = 10:1), **41** was afforded as yellow oil liquid (53.8 mg, 93%).

**<sup>1</sup>H NMR** (400 MHz, CDCl<sub>3</sub>): δ 8.01 – 7.86 (m, 3H), 7.65 – 7.55 (m, 3H), 7.54 – 7.45 (m, 3H), 7.45 – 7.31 (m, 2H) ppm.

**<sup>13</sup>C NMR** (101 MHz, CDCl<sub>3</sub>): δ 156.6, 155.9, 149.4, 136.2, 132.3, 132.1, 128.3, 128.1, 127.5, 127.0, 124.7, 124.1, 124.1, 122.9, 120.8, 120.1, 111.8, 111.7 ppm.

**HRMS** (ESI-TOF) m/z: [M+H]<sup>+</sup> Calcd for C<sub>18</sub>H<sub>12</sub>NO<sub>3</sub><sup>+</sup> 290.0812; found 290.0808.

### 9-methyl-3-(2-nitrophenyl)-9H-carbazole (42)

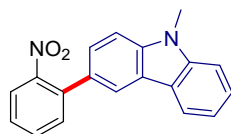

Compound **42** was prepared following the procedure **A**, starting from 5-(9-methyl-9H-carbazol-3-yl)-5H-thianthren-5-ium trifluoromethanesulfonate (109.1 mg, 0.2 mmol) and potassium 2-nitrobenzoate (49.2 mg, 0.24 mmol). After column chromatography on silica (Petroleum Ether: EtOAc = 10:1), **42** was afforded as yellow solid (33.9 mg, 56%).

**M.P.:** 109 – 112 °C.

## SUPPORTING INFORMATION

**<sup>1</sup>H NMR** (400 MHz, CDCl<sub>3</sub>): δ 8.13 – 8.06 (m, 2H), 7.90 – 7.82 (m, 1H), 7.65 – 7.57 (m, 2H), 7.55 – 7.45 (m, 2H), 7.44 – 7.40 (m, 3H), 7.30 – 7.25 (m, 1H), 3.83 (s, 3H) ppm.

**<sup>13</sup>C NMR** (101 MHz, CDCl<sub>3</sub>): δ 149.7, 141.3, 140.6, 137.0, 132.4, 132.0, 127.8, 127.4, 126.1, 125.5, 123.9, 123.0, 122.5, 120.4, 119.7, 119.2, 108.7, 108.6, 29.0 ppm.

**HRMS** (ESI-TOF) m/z: [M+H]<sup>+</sup> Calcd for C<sub>19</sub>H<sub>15</sub>N<sub>2</sub>O<sub>2</sub><sup>+</sup> 303.1128; found 303.1124.

### 2,4-dimethyl-2'-nitro-1,1'-biphenyl (43)

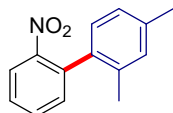

Compound **43** was prepared following the procedure **A**, starting from 5-(2,4-dimethylphenyl)-5H-thianthren-5-ium trifluoromethanesulfonate (94.1 mg, 0.2 mmol) and potassium 2-nitrobenzoate (49.2 mg, 0.24 mmol). After column chromatography on silica (Petroleum Ether: EtOAc = 15:1), **43** was afforded as yellow oil liquid (23.2 mg, 51%).

**<sup>1</sup>H NMR** (400 MHz, CDCl<sub>3</sub>): δ 8.03 – 7.91 (m, 1H), 7.66 – 7.60 (m, 1H), 7.53 – 7.48 (m, 1H), 7.36 – 7.31 (m, 1H), 7.10 (s, 1H), 7.07 – 6.99 (m, 2H), 2.37 (s, 3H), 2.08 (s, 3H) ppm.

**<sup>13</sup>C NMR** (101 MHz, CDCl<sub>3</sub>): δ 149.3, 137.9, 136.5, 135.4, 134.5, 132.4, 132.3, 130.8, 128.2, 128.1, 126.4, 124.0, 21.1, 19.7 ppm.

**HRMS** (ESI-TOF) m/z: [M+H]<sup>+</sup> Calcd for C<sub>14</sub>H<sub>14</sub>NO<sub>2</sub><sup>+</sup> 228.1019; found 228.1017.

### 5-chloro-4'-methoxy-2-nitro-1,1'-biphenyl (44)

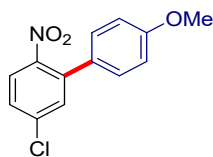

Compound **44** was prepared following the procedure **A**, starting from 5-(4-methoxyphenyl)-5H-thianthren-5-ium trifluoromethanesulfonate (94.5 mg, 0.2 mmol) and potassium 5-chloro-2-nitrobenzoate (57.3 mg, 0.24 mmol). After column chromatography on silica (Petroleum Ether: EtOAc = 10:1), **44** was afforded as yellowish-green solid (50.6 mg, 96%).

**M.P.:** 78 – 79 °C.

**<sup>1</sup>H NMR** (400 MHz, CDCl<sub>3</sub>): δ 7.78 (d, *J* = 9.0 Hz, 1H), 7.44 – 7.37 (m, 2H), 7.27 – 7.19 (m, 2H), 6.99 – 6.92 (m, 2H), 3.84 (s, 3H) ppm.

**<sup>13</sup>C NMR** (101 MHz, CDCl<sub>3</sub>): δ 160.0, 147.5, 138.2, 137.7, 131.8, 129.0, 128.2, 127.7, 125.5, 114.3, 55.3 ppm.

**HRMS** (ESI-TOF) m/z: [M+H]<sup>+</sup> Calcd for C<sub>13</sub>H<sub>11</sub>ClNO<sub>3</sub><sup>+</sup> 264.0422; found 264.0418.

### 4-chloro-4'-methoxy-2-nitro-1,1'-biphenyl (45)

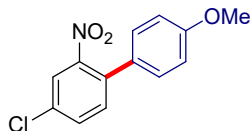

Compound **45** was prepared following the procedure **A**, starting from 5-(4-methoxyphenyl)-5H-thianthren-5-ium trifluoromethanesulfonate (94.5 mg, 0.2 mmol) and potassium 4-chloro-2-nitrobenzoate (57.5 mg, 0.24 mmol). After column chromatography on silica (Petroleum Ether: EtOAc = 12:1), **45** was afforded as yellow solid (42.7 mg, 81%).

## SUPPORTING INFORMATION

**M.P.:** 115 – 116 °C.

**<sup>1</sup>H NMR** (400 MHz, CDCl<sub>3</sub>): δ 7.80 (d, *J* = 2.2 Hz, 1H), 7.58 – 7.54 (m, 1H), 7.38 (d, *J* = 8.3 Hz, 1H), 7.25 – 7.19 (m, 2H), 6.99 – 6.92 (m, 2H), 3.84 (s, 3H) ppm.

**<sup>13</sup>C NMR** (101 MHz, CDCl<sub>3</sub>): δ 159.9, 149.5, 134.3, 133.4, 133.0, 132.2, 129.1, 128.3, 124.1, 114.3, 55.3 ppm.

**HRMS** (ESI-TOF) *m/z*: [M+H]<sup>+</sup> Calcd for C<sub>13</sub>H<sub>11</sub>ClNO<sub>3</sub><sup>+</sup> 264.0422; found 264.0416.

### 3-chloro-4'-methoxy-2-nitro-1,1'-biphenyl (46)

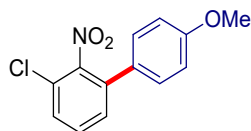

Compound **46** was prepared following the procedure **A**, starting from 5-(4-methoxyphenyl)-5*H*-thianthren-5-ium trifluoromethanesulfonate (94.5 mg, 0.2 mmol) and potassium 3-chloro-2-nitrobenzoate (57.5 mg, 0.24 mmol). After column chromatography on silica (Petroleum Ether: EtOAc = 15:1), **46** was afforded as yellow oily liquid (20.6 mg, 39%).

**<sup>1</sup>H NMR** (400 MHz, CDCl<sub>3</sub>): δ 7.48 – 7.41 (m, 2H), 7.36 – 7.31 (m, 1H), 7.31 – 7.26 (m, 2H), 6.97 – 6.92 (m, 2H), 3.83 (s, 3H) ppm.

**<sup>13</sup>C NMR** (101 MHz, CDCl<sub>3</sub>): δ 160.2, 135.8, 130.6, 129.5, 129.2, 128.8, 127.6, 125.2, 114.4, 55.3 ppm.

**HRMS** (ESI-TOF) *m/z*: [M+H]<sup>+</sup> Calcd for C<sub>13</sub>H<sub>11</sub>ClNO<sub>3</sub><sup>+</sup> 264.0422; found 264.0420.

### 4'-chloro-2-nitro-1,1'-biphenyl (47)

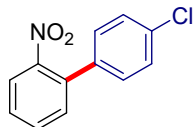

Compound **47** was prepared following the procedure **A**, starting from 5-(4-chlorophenyl)-5*H*-thianthren-5-ium trifluoromethanesulfonate (95.4 mg, 0.2 mmol) and potassium 2-nitrobenzoate (49.2 mg, 0.24 mmol). After column chromatography on silica (Petroleum Ether: EtOAc = 15:1), **47** was afforded as yellow oil liquid (39.7 mg, 85%).

**<sup>1</sup>H NMR** (400 MHz, CDCl<sub>3</sub>): δ 7.93 – 7.83 (m, 1H), 7.65 – 7.60 (m, 1H), 7.53 – 7.47 (m, 1H), 7.43 – 7.37 (m, 3H), 7.27 – 7.23 (m, 2H) ppm.

**<sup>13</sup>C NMR** (101 MHz, CDCl<sub>3</sub>): δ 149.0, 135.9, 135.1, 134.4, 132.5, 131.8, 129.2, 128.9, 128.5, 124.2 ppm.

**HRMS** (ESI-TOF) *m/z*: [M+H]<sup>+</sup> Calcd for C<sub>12</sub>H<sub>9</sub>ClNO<sub>2</sub><sup>+</sup> 234.0316; found 234.0308.

### 3'-chloro-4'-methoxy-2-nitro-1,1'-biphenyl (48)

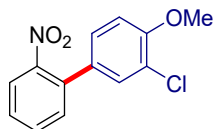

Compound **48** was prepared following the procedure **A**, starting from 5-(3-chloro-4-methoxyphenyl)-5*H*-thianthren-5-ium trifluoromethanesulfonate (101.4 mg, 0.2 mmol) and potassium 2-nitrobenzoate (49.2 mg, 0.24 mmol). After column chromatography on silica (Petroleum Ether: EtOAc = 10:1), **48** was afforded as yellow solid (39.6 mg, 75%).

**M.P.:** 88 – 91 °C.

## SUPPORTING INFORMATION

**<sup>1</sup>H NMR** (400 MHz, CDCl<sub>3</sub>): δ 7.87 – 7.81 (m, 1H), 7.63 – 7.58 (m, 1H), 7.51 – 7.44 (m, 1H), 7.43 – 7.39 (m, 1H), 7.36 (d, *J* = 2.2 Hz, 1H), 7.20 – 7.13 (m, 1H), 6.96 (d, *J* = 8.5 Hz, 1H), 3.94 (s, 3H) ppm.

**<sup>13</sup>C NMR** (101 MHz, CDCl<sub>3</sub>): δ 155.0, 149.1, 134.6, 132.3, 131.9, 130.4, 129.7, 128.3, 127.4, 124.2, 122.7, 112.0, 56.2 ppm.

**HRMS** (ESI-TOF) *m/z*: [M+H]<sup>+</sup> Calcd for C<sub>13</sub>H<sub>11</sub>ClNO<sub>3</sub><sup>+</sup> 264.0422; found 264.0422.

### 4''-chloro-2-nitro-1,1':4',1''-terphenyl (49)

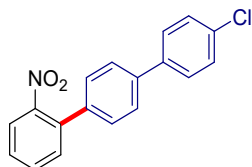

Compound **49** was prepared following the procedure **A**, starting from 5-(4'-chloro-[1,1'-biphenyl]-4-yl)-5H-thianthren-5-ium trifluoromethanesulfonate (110.6 mg, 0.2 mmol) and potassium 2-nitrobenzoate (49.2 mg, 0.24 mmol). After column chromatography on silica (Petroleum Ether: EtOAc = 10:1), **49** was afforded as yellow solid (40.9 mg, 66%).

**M.P.:** 98 - 100 °C.

**<sup>1</sup>H NMR** (400 MHz, CDCl<sub>3</sub>): δ 7.93 – 7.85 (m, 1H), 7.68 – 7.60 (m, 3H), 7.59 – 7.54 (m, 2H), 7.54 – 7.37 (m, 6H) ppm.

**<sup>13</sup>C NMR** (101 MHz, CDCl<sub>3</sub>): δ 149.2, 139.8, 138.7, 136.6, 135.8, 133.7, 132.4, 131.9, 129.0, 128.4, 128.3, 128.3, 127.2, 124.2 ppm.

**HRMS** (ESI-TOF) *m/z*: [M+H]<sup>+</sup> Calcd for C<sub>18</sub>H<sub>13</sub>ClNO<sub>2</sub><sup>+</sup> 310.0629; found 310.0620.

### 2''-nitro-[1,1':4',1''-terphenyl]-4-yl trifluoromethanesulfonate (50)

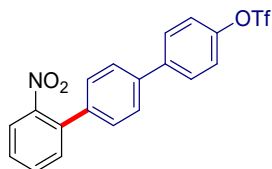

Compound **50** was prepared following the procedure **A**, starting from 5-(4'-(((trifluoromethyl)sulfonyl)oxy)-[1,1'-biphenyl]-4-yl)-5H-thianthren-5-ium trifluoromethanesulfonate (133.3 mg, 0.2 mmol) and potassium 2-nitrobenzoate (49.2 mg, 0.24 mmol). After column chromatography on silica (Petroleum Ether: EtOAc = 10:1), **50** was afforded as yellow oil liquid (59.3 mg, 70%).

**<sup>1</sup>H NMR** (400 MHz, CDCl<sub>3</sub>): δ 7.93 – 7.87 (m, 1H), 7.70 – 7.59 (m, 5H), 7.55 – 7.47 (m, 2H), 7.45 – 7.34 (m, 4H) ppm.

**<sup>13</sup>C NMR** (101 MHz, CDCl<sub>3</sub>): δ 149.2, 149.1, 140.8, 139.0, 137.2, 135.6, 132.4, 131.9, 128.9, 128.5, 128.4, 127.4, 124.2, 121.7, 118.7 (q, *J* = 322.2 Hz) ppm.

**HRMS** (ESI-TOF) *m/z*: [M+H]<sup>+</sup> Calcd for C<sub>19</sub>H<sub>13</sub>F<sub>3</sub>NO<sub>5</sub>S<sup>+</sup> 424.0461; found 424.0452.

### 4-bromo-5-fluoro-4'-methoxy-2-nitro-1,1'-biphenyl (51)

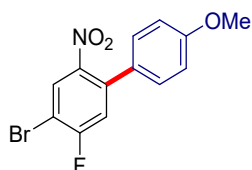

## SUPPORTING INFORMATION

Compound **51** was prepared following the procedure **B**, starting from 5-(4-methoxyphenyl)-5*H*-thianthren-5-ium trifluoromethanesulfonate (141.8 mg, 0.3 mmol) and potassium 4-bromo-5-fluoro-2-nitrobenzoate (60.4 mg, 0.20 mmol) with 0.1 mmol thianthrene and 5 mol% Pd(OAc)<sub>2</sub>. After column chromatography on silica (Petroleum Ether: EtOAc = 20:1), **51** was afforded as yellow solid (32.5 mg, 50%).

**M.P.:** 92 – 94 °C.

**<sup>1</sup>H NMR** (400 MHz, CDCl<sub>3</sub>): δ 8.09 (d, *J* = 6.2 Hz, 1H), 7.23 – 7.20 (m, 2H), 7.18 (d, *J* = 8.6 Hz, 1H), 6.97 – 6.94 (m, 2H), 3.85 (s, 3H) ppm.

**<sup>13</sup>C NMR** (101 MHz, CDCl<sub>3</sub>): δ 160.6 (d, *J* = 257.6 Hz), 160.2, 138.0 (d, *J* = 8.2 Hz), 135.8, 129.8 (d, *J* = 2.2 Hz), 128.9, 127.7 (d, *J* = 1.1 Hz), 119.2 (d, *J* = 24.2 Hz), 114.4, 107.8 (d, *J* = 23.6 Hz), 55.4 ppm.

**<sup>19</sup>F NMR** (377 MHz, CDCl<sub>3</sub>): δ – 99.8 ppm.

**HRMS** (ESI-TOF) *m/z*: [M+H]<sup>+</sup> Calcd for C<sub>13</sub>H<sub>10</sub>BrFNO<sub>3</sub><sup>+</sup> 325.9823; found 325.9817.

### 4''-bromo-2-nitro-1,1':4',1''-terphenyl (**52**)

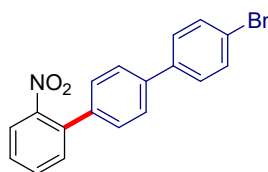

Compound **52** was prepared following the procedure **A**, starting from 5-(4'-bromo-[1,1'-biphenyl]-4-yl)-5*H*-thianthren-5-ium trifluoromethanesulfonate (119.5 mg, 0.2 mmol) and potassium 2-nitrobenzoate (49.2 mg, 0.24 mmol) with 0.1 mmol thianthrene. After column chromatography on silica (Petroleum Ether: EtOAc = 10:1), **52** was afforded as yellow solid (51.0 mg, 72%).

**M.P.:** 105 - 107 °C.

**<sup>1</sup>H NMR** (400 MHz, CDCl<sub>3</sub>): δ 7.88 (d, *J* = 8.1 Hz, 1H), 7.66 – 7.56 (m, 5H), 7.53 – 7.46 (m, 4H), 7.43 – 7.37 (m, 2H) ppm.

**<sup>13</sup>C NMR** (101 MHz, CDCl<sub>3</sub>): δ 149.2, 139.8, 139.2, 136.7, 135.7, 132.4, 131.9, 131.8, 128.7, 128.4, 128.3, 127.1, 124.2, 121.9 ppm.

**HRMS** (ESI-TOF) *m/z*: [M+H]<sup>+</sup> Calcd for C<sub>18</sub>H<sub>13</sub>BrNO<sub>2</sub><sup>+</sup> 354.0124; found 354.0122.

### 3''-bromo-2-nitro-1,1':4',1''-terphenyl (**53**)

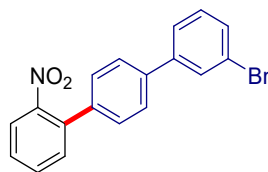

Compound **53** was prepared following the procedure **A**, starting from 5-(3'-bromo-[1,1'-biphenyl]-4-yl)-5*H*-thianthren-5-ium trifluoromethanesulfonate (119.5 mg, 0.2 mmol) and potassium 2-nitrobenzoate (49.2 mg, 0.24 mmol) with 0.1 mmol thianthrene. After column chromatography on silica (Petroleum Ether: EtOAc = 10:1), **53** was afforded as yellow solid (58.6 mg, 83%).

**M.P.:** 105 - 108 °C.

**<sup>1</sup>H NMR** (400 MHz, CDCl<sub>3</sub>): δ 7.92 – 7.86 (m, 1H), 7.80 – 7.74 (m, 1H), 7.65 – 7.59 (m, 3H), 7.56 – 7.47 (m, 4H), 7.42 – 7.39 (m, 2H), 7.32 (t, *J* = 7.9 Hz, 1H) ppm.

**<sup>13</sup>C NMR** (101 MHz, CDCl<sub>3</sub>): δ 149.2, 142.4, 139.5, 136.9, 135.7, 132.4, 131.9, 130.5, 130.3, 130.1, 128.4, 128.3, 127.3, 125.7, 124.2, 122.9 ppm.

**HRMS** (ESI-TOF) *m/z*: [M+H]<sup>+</sup> Calcd for C<sub>18</sub>H<sub>13</sub>BrNO<sub>2</sub><sup>+</sup> 354.0124; found 354.0118.

## SUPPORTING INFORMATION

### 4-bromo-2-fluoro-2''-nitro-1,1':4',1''-terphenyl (54)

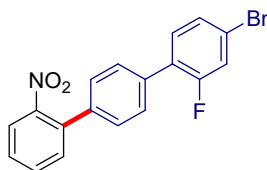

Compound **54** was prepared following the procedure **A**, starting from 5-(4'-bromo-2'-fluoro-[1,1'-biphenyl]-4-yl)-5H-thianthrene-5-ium trifluoromethanesulfonate (123.1 mg, 0.2 mmol) and potassium 2-nitrobenzoate (49.2 mg, 0.24 mmol) 0.1 mmol thianthrene. After column chromatography on silica (Petroleum Ether: EtOAc = 10:1), **54** was afforded as yellow solid (65.3 mg, 88%).

**M.P.:** 102 - 105 °C.

**<sup>1</sup>H NMR** (400 MHz, CDCl<sub>3</sub>): δ 7.92 – 7.86 (m, 1H), 7.66 – 7.62 (m, 1H), 7.61 -7.56 (m, 2H), 7.53 – 7.47 (m, 2H), 7.44 – 7.32 (m, 5H) ppm.

**<sup>13</sup>C NMR** (101 MHz, CDCl<sub>3</sub>): δ 159.4 (d, *J* = 253.5 Hz), 149.1, 137.0, 135.7, 134.6 (d, *J* = 1.0 Hz), 132.4, 131.9, 131.6 (d, *J* = 4.0 Hz), 129.0 (d, *J* = 3.2 Hz), 128.3, 128.1, 127.8 (d, *J* = 3.9 Hz), 127.3 (d, *J* = 13.3 Hz), 124.2, 121.6 (d, *J* = 9.6 Hz), 119.7 (d, *J* = 26.2 Hz) ppm.

**<sup>19</sup>F NMR** (377 MHz, CDCl<sub>3</sub>): δ – 114.8 ppm.

**HRMS** (ESI-TOF) *m/z*: [M+H]<sup>+</sup> Calcd for C<sub>18</sub>H<sub>12</sub>BrFNO<sub>2</sub><sup>+</sup> 372.0030; found 372.0030.

### 4'-bromo-2-nitro-1,1'-biphenyl (55)

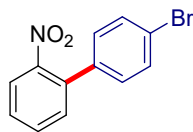

Compound **55** was prepared following the procedure **A**, starting from 5-(4-bromophenyl)-5H-thianthrene-5-ium trifluoromethanesulfonate (156.5 mg, 0.2 mmol) and potassium 2-nitrobenzoate (41.0 mg, 0.20 mmol) with 0.1 mmol thianthrene and 5 mol% Pd(OAc)<sub>2</sub>. After column chromatography on silica (Petroleum Ether: EtOAc = 15:1), **55** was afforded as yellow oil liquid (22.7 mg, 41%).

**<sup>1</sup>H NMR** (400 MHz, CDCl<sub>3</sub>): δ 7.92 – 7.85 (m, 1H), 7.65 – 7.60 (m, 1H), 7.58 – 7.48 (m, 3H), 7.43 – 7.38 (m, 1H), 7.23 – 7.15 (m, 2H) ppm.

**<sup>13</sup>C NMR** (101 MHz, CDCl<sub>3</sub>): δ 148.9, 136.4, 135.2, 132.5, 131.8, 131.8, 129.5, 128.6, 124.3, 122.6 ppm.

**HRMS** (ESI-TOF) *m/z*: [M+H]<sup>+</sup> Calcd for C<sub>12</sub>H<sub>9</sub>BrNO<sub>2</sub><sup>+</sup> 277.9811; found 277.9801.

### 4'-(4-bromo-3-chlorophenoxy)-2-nitro-1,1'-biphenyl (56)

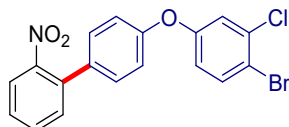

Compound **56** was prepared following the procedure **A**, starting from 5-(4-(4-bromo-3-chlorophenoxy)phenyl)-5H-thianthrene-5-ium trifluoromethanesulfonate (129.2 mg, 0.2 mmol) and potassium 2-nitrobenzoate (49.2 mg, 0.24 mmol) 0.1 mmol thianthrene. After column chromatography on silica (Petroleum Ether: EtOAc = 10:1), **56** was afforded as yellow solid (72.6 mg, 90%).

**M.P.:** 102 - 105 °C.

**<sup>1</sup>H NMR** (400 MHz, CDCl<sub>3</sub>): δ 7.88 – 7.86 (m, 1H), 7.64 – 7.60 (m, 1H), 7.56 (d, *J* = 8.8 Hz, 1H), 7.51 – 7.43 (m, 2H), 7.33 – 7.29 (m, 2H), 7.17 (d, *J* = 2.7 Hz, 1H), 7.07 – 7.03 (m, 2H), 6.86 – 6.82 (m, 1H) ppm.

## SUPPORTING INFORMATION

**<sup>13</sup>C NMR** (101 MHz, CDCl<sub>3</sub>): δ 156.7, 156.3, 149.2, 135.4, 135.3, 134.3, 133.2, 132.3, 131.9, 129.6, 128.3, 124.1, 120.8, 119.1, 118.6, 116.2 ppm.

**HRMS** (ESI-TOF) m/z: [M+H]<sup>+</sup> Calcd for C<sub>18</sub>H<sub>12</sub>BrClNO<sub>3</sub><sup>+</sup>403.9684; found 403.9682.

### 4''-iodo-2-nitro-1,1':4',1''-terphenyl (57)

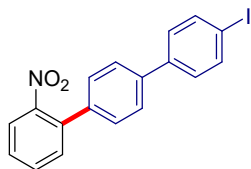

Compound **57** was prepared following the procedure **A**, starting from 5-(4'-iodo-[1,1'-biphenyl]-4-yl)-5H-thianthren-5-ium trifluoromethanesulfonate (128.9 mg, 0.2 mmol) and potassium 2-nitrobenzoate (49.2 mg, 0.24 mmol) with 0.1 mmol thianthrene. After column chromatography on silica (Petroleum Ether: EtOAc = 10:1), **57** was afforded as yellow solid (32.1 mg, 40%).

**M.P.:** 113 - 117 °C.

**<sup>1</sup>H NMR** (400 MHz, CDCl<sub>3</sub>): δ 7.92 – 7.86 (m, 1H), 7.81 – 7.76 (m, 2H), 7.65 – 7.59 (m, 3H), 7.53 – 7.47 (m, 2H), 7.42 – 7.40 (m, 1H), 7.40 – 7.37 (m, 2H), 7.36 – 7.35 (m, 1H) ppm.

**<sup>13</sup>C NMR** (101 MHz, CDCl<sub>3</sub>): δ 149.2, 139.9, 139.8, 137.9, 136.7, 135.8, 132.3, 131.9, 128.9, 128.5, 128.3, 127.1, 124.2, 93.4 ppm.

**HRMS** (ESI-TOF) m/z: [M+H]<sup>+</sup> Calcd for C<sub>18</sub>H<sub>13</sub>INO<sub>2</sub><sup>+</sup> 401.9985; found 401.9976.

### 4'-(4-iodophenoxy)-2-nitro-1,1'-biphenyl (58)

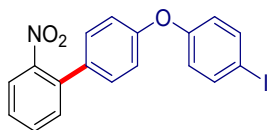

Compound **58** was prepared following the procedure **A**, starting from 5-(4-(4-iodophenoxy)phenyl)-5H-thianthren-5-ium trifluoromethanesulfonate (132.1 mg, 0.2 mmol) and potassium 2-nitrobenzoate (49.2 mg, 0.24 mmol) with 0.1 mmol thianthrene. After column chromatography on silica (Petroleum Ether: EtOAc = 15:1), **58** was afforded as yellow oil liquid (46.7 mg, 56%).

**<sup>1</sup>H NMR** (400 MHz, CDCl<sub>3</sub>): δ 7.85 (d, *J* = 8.0 Hz, 1H), 7.68 – 7.59 (m, 3H), 7.51 – 7.43 (m, 2H), 7.31 – 7.27 (m, 2H), 7.06 – 7.02 (m, 2H), 6.87 – 6.80 (m, 2H) ppm.

**<sup>13</sup>C NMR** (101 MHz, CDCl<sub>3</sub>): δ 156.9, 156.7, 149.3, 138.8, 135.5, 132.5, 132.3, 131.9, 129.5, 128.2, 124.1, 121.4, 118.8, 86.6 ppm.

**HRMS** (ESI-TOF) m/z: [M+H]<sup>+</sup> Calcd for C<sub>18</sub>H<sub>13</sub>INO<sub>3</sub><sup>+</sup> 417.9935; found 417.9929.

### 2''-nitro-[1,1':4',1''-terphenyl]-4-yl 2-(4-isobutylphenyl)propanoate (59)

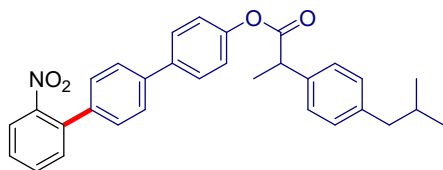

Compound **59** was prepared following the procedure **H**, 5-(4'-((2-(4-isobutylphenyl)propanoyl)oxy)-[1,1'-biphenyl]-4-yl)-5H-thianthren-5-ium trifluoromethanesulfonate (144.6 mg, 0.2 mmol) and potassium 2-nitrobenzoate (49.2 mg, 0.24 mmol) with 0.1 mmol thianthrene and 5 mol% Pd(OAc)<sub>2</sub>. After column

## SUPPORTING INFORMATION

chromatography on silica (Petroleum Ether: EtOAc = 10:1), **59** was afforded as yellow waxy liquid (48.8 mg, 51%).

**<sup>1</sup>H NMR** (400 MHz, CDCl<sub>3</sub>): δ 7.87 (d, *J* = 8.6 Hz, 1H), 7.65 – 7.57 (m, 5H), 7.52 – 7.46 (m, 2H), 7.41 – 7.37 (m, 2H), 7.36 – 7.31 (m, 2H), 7.20 – 7.15 (m, 2H), 7.14 – 7.07 (m, 2H), 4.02 – 3.93 (m, 1H), 2.53 – 2.47 (m, 2H), 1.95 – 1.85 (m, 1H), 1.68 – 1.61 (m, 3H), 0.96 – 0.91 (m, 6H) ppm.

**<sup>13</sup>C NMR** (101 MHz, CDCl<sub>3</sub>): δ 173.2, 150.5, 149.2, 140.8, 140.2, 138.0, 137.2, 136.3, 135.9, 132.3, 131.9, 129.5, 128.3, 128.2, 128.0, 127.3, 127.2, 124.1, 121.8, 45.3, 45.0, 30.2, 22.4, 18.5 ppm.

**HRMS** (ESI-TOF) *m/z*: [M+H]<sup>+</sup> Calcd for C<sub>31</sub>H<sub>30</sub>NO<sub>4</sub><sup>+</sup> 480.2169; found 480.2162.

### 2-isopropyl-5-methylcyclohexyl 2''-nitro-[1,1':4',1''-terphenyl]-4-carboxylate (**60**)

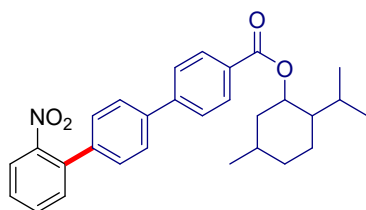

Compound **60** was prepared following the procedure **A**, 5-(4'-(((2-isopropyl-5-methylcyclohexyl)oxy)carbonyl)-[1,1'-biphenyl]-4-yl)-5H-thianthren-5-ium trifluoromethanesulfonate (140.2 mg, 0.2 mmol) and potassium 2-nitrobenzoate (49.2 mg, 0.24 mmol). After column chromatography on silica (Petroleum Ether: EtOAc = 10:1), **60** was afforded as yellow oil liquid (69.6 mg, 76%).

**<sup>1</sup>H NMR** (400 MHz, CDCl<sub>3</sub>): δ 8.24 – 8.07 (m, 2H), 7.87 (d, *J* = 8.0 Hz, 1H), 7.72 – 7.65 (m, 4H), 7.64 – 7.59 (m, 1H), 7.51 – 7.45 (m, 2H), 7.44 – 7.38 (m, 2H), 5.07 – 4.91 (m, 1H), 2.18 (d, *J* = 12.6 Hz, 1H), 2.09 – 1.97 (m, 1H), 1.80 – 1.71 (m, 2H), 1.66 – 1.54 (m, 2H), 1.21 – 1.10 (m, 2H), 1.00 – 0.92 (m, 7H), 0.87 – 0.82 (m, 3H) ppm.

**<sup>13</sup>C NMR** (101 MHz, CDCl<sub>3</sub>): δ 165.9, 149.2, 144.6, 139.9, 137.2, 135.7, 132.4, 131.9, 130.2, 129.9, 128.5, 128.4, 127.5, 127.0, 124.2, 74.9, 47.3, 41.0, 34.3, 31.5, 26.6, 23.7, 22.1, 20.8, 16.6 ppm.

**HRMS** (ESI-TOF) *m/z*: [M+H]<sup>+</sup> Calcd for C<sub>29</sub>H<sub>32</sub>NO<sub>4</sub><sup>+</sup> 458.2326; found 458.2324.

### methyl 2-(2-fluoro-2''-nitro-[1,1':4',1''-terphenyl]-4-yl)propanoate (**61**)

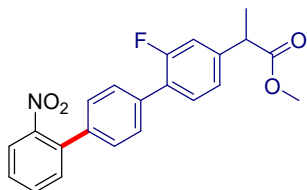

Compound **61** was prepared following the procedure **A**, starting from 5-(2'-fluoro-4'-(1-methoxy-1-oxopropan-2-yl)-[1,1'-biphenyl]-4-yl)-5H-thianthren-5-ium trifluoromethanesulfonate (124.5 mg, 0.2 mmol) and potassium 2-nitrobenzoate (49.0 mg, 0.24 mmol). After column chromatography on silica (Petroleum Ether: EtOAc = 10:1), **61** was afforded as yellow solid (51.6 mg, 68%).

**M.P.:** 78 – 82 °C.

**<sup>1</sup>H NMR** (400 MHz, CDCl<sub>3</sub>): δ 7.87 (d, *J* = 8.8 Hz, 1H), 7.65 – 7.58 (m, 3H), 7.51 – 7.37 (m, 5H), 7.20 – 7.13 (m, 2H), 3.82 – 3.75 (m, 1H), 3.71 (s, 3H), 1.55 (d, *J* = 7.2 Hz, 3H) ppm.

**<sup>13</sup>C NMR** (101 MHz, CDCl<sub>3</sub>): δ 174.3, 159.7 (d, *J* = 249.5 Hz), 149.2, 142.2 (d, *J* = 8.2 Hz), 136.6, 135.8, 135.3, 132.3, 131.9, 130.7 (d, *J* = 3.9 Hz), 129.1 (d, *J* = 3.1 Hz), 128.2, 128.0, 126.9 (d, *J* = 13.1 Hz), 124.1, 123.6 (d, *J* = 3.1 Hz), 115.2 (d, *J* = 23.2 Hz), 52.1, 44.8, 18.3 ppm.

**HRMS** (ESI-TOF) *m/z*: [M+H]<sup>+</sup> Calcd for C<sub>22</sub>H<sub>19</sub>FNO<sub>4</sub><sup>+</sup> 380.1293; found 380.1286.

**methyl 5-((2,5-dimethyl-2'-nitro-[1,1'-biphenyl]-4-yl)oxy)-2,2-dimethylpentanoate (62)**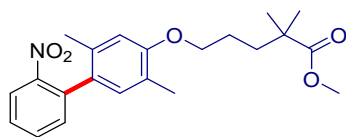

Compound **62** was prepared following the procedure **A**, starting from 5-(4-((5-methoxy-4,4-dimethyl-5-oxopentyl)oxy)-2,5-dimethylphenyl)-5H-thianthren-5-ium trifluoromethanesulfonate (125.7 mg, 0.2 mmol) and potassium 2-nitrobenzoate (49.2 mg, 0.24 mmol) with 0.1 mmol thianthrene and 5 mol% Pd(OAc)<sub>2</sub>. After column chromatography on silica (Petroleum Ether: EtOAc = 10:1), **62** was afforded as green oil liquid (43.2 mg, 56%).

**<sup>1</sup>H NMR** (400 MHz, CDCl<sub>3</sub>): δ 7.92 (d, *J* = 8.1 Hz, 1H), 7.62 – 7.56 (m, 1H), 7.50 – 7.44 (m, 1H), 7.31 (d, *J* = 7.6 Hz, 1H), 6.87 (s, 1H), 6.67 (s, 1H), 3.99 – 3.94 (m, 2H), 3.68 (s, 3H), 2.19 (s, 3H), 2.06 (s, 3H), 1.79 – 1.73 (m, 4H), 1.24 (s, 6H) ppm.

**<sup>13</sup>C NMR** (101 MHz, CDCl<sub>3</sub>): δ 178.2, 156.8, 149.6, 136.4, 134.0, 132.6, 132.2, 130.5, 128.8, 127.8, 123.9, 123.8, 112.3, 67.9, 51.7, 42.1, 37.1, 25.2, 25.1, 19.8, 15.6 ppm.

**HRMS** (ESI-TOF) *m/z*: [M+H]<sup>+</sup> Calcd for C<sub>22</sub>H<sub>28</sub>NO<sub>5</sub><sup>+</sup> 386.1962; found 386.1958.

**2-((1-(4-((2'-nitro-[1,1'-biphenyl]-4-yl)oxy)phenoxy)propan-2-yl)oxy)pyridine (63)**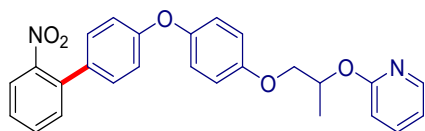

Compound **63** was prepared following the procedure **A**, starting from 5-(4-(4-(2-(pyridin-2-yloxy)propoxy)phenoxy)phenyl)-5H-thianthren-5-ium trifluoromethanesulfonate (137.1 mg, 0.2 mmol) and potassium 2-nitrobenzoate (49.2 mg, 0.24 mmol) with 0.1 mmol thianthrene and 5 mol% Pd(OAc). After column chromatography on silica (Petroleum Ether: EtOAc = 5:1), **63** was afforded as green oil liquid (44.3 mg, 50%).

**<sup>1</sup>H NMR** (400 MHz, CDCl<sub>3</sub>): δ 8.26 – 8.09 (m, 1H), 7.92 – 7.77 (m, 1H), 7.70 – 7.53 (m, 2H), 7.53 – 7.38 (m, 2H), 7.32 – 7.22 (m, 2H), 7.09 – 6.85 (m, 7H), 6.82 – 6.72 (m, 1H), 5.80 – 5.48 (m, 1H), 4.28 – 4.04 (m, 2H), 1.58 – 1.45 (m, 3H) ppm.

**<sup>13</sup>C NMR** (101 MHz, CDCl<sub>3</sub>): δ 163.1, 158.8, 155.5, 149.5, 149.3, 146.7, 138.7, 135.7, 132.2, 131.9, 131.1, 129.2, 127.9, 124.0, 121.2, 117.3, 116.8, 115.8, 111.7, 71.0, 69.2, 17.0 ppm.

**HRMS** (ESI-TOF) *m/z*: [M+H]<sup>+</sup> Calcd for C<sub>26</sub>H<sub>23</sub>N<sub>2</sub>O<sub>5</sub><sup>+</sup> 443.1601; found 443.1596.

**N-methyl-N-(4-nitro-2-((2'-nitro-[1,1'-biphenyl]-4-yl)oxy)phenyl)methanesulfonamide (64)**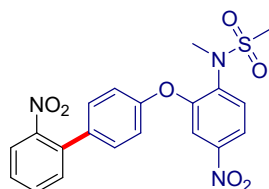

Compound **64** was prepared following the procedure **A**, starting from 5-(4-(2-(N-methylmethanesulfonamido)-5-nitrophenoxy)phenyl)-5H-thianthren-5-ium trifluoromethanesulfonate (137.3 mg, 0.2 mmol) and potassium 2-nitrobenzoate (49.2 mg, 0.24 mmol). After column chromatography on silica (Petroleum Ether: EtOAc = 10:1), **64** was afforded as green oil liquid (53.2 mg, 60%).

**<sup>1</sup>H NMR** (400 MHz, CDCl<sub>3</sub>): δ 7.99 - 7.94 (m, 1H), 7.88 (d, *J* = 8.1 Hz, 1H), 7.79 – 7.73 (m, 1H), 7.69 – 7.63 (m, 2H), 7.55 – 7.47 (m, 2H), 7.41 – 7.37 (m, 2H), 7.16 – 7.12 (m, 2H), 3.36 (s, 3H), 3.01 (s, 3H) ppm.

## SUPPORTING INFORMATION

**<sup>13</sup>C NMR** (101 MHz, CDCl<sub>3</sub>): δ 154.8, 154.3, 149.1, 147.8, 137.3, 135.1, 134.9, 132.7, 132.0, 130.4, 128.7, 124.4, 119.6, 118.7, 113.6, 38.7, 37.9, 37.8 ppm.

**HRMS** (ESI-TOF) m/z: [M+H]<sup>+</sup> Calcd for C<sub>20</sub>H<sub>18</sub>N<sub>3</sub>O<sub>7</sub>S<sup>+</sup> 444.0860; found 444.0854.

### ethyl 2-methyl-2-((2'-nitro-[1,1'-biphenyl]-4-yl)oxy)propanoate (65)

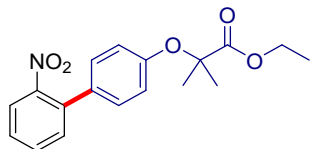

Compound **65** was prepared following the procedure **A**, starting from 5-(4-((1-ethoxy-2-methyl-1-oxopropan-2-yl)oxy)phenyl)-5H-thianthren-5-ium trifluoromethanesulfonate (114.5 mg, 0.2 mmol) and potassium 2-nitrobenzoate (49.2 mg, 0.24 mmol). After column chromatography on silica (Petroleum Ether: EtOAc = 10:1), **65** was afforded as green oil liquid (34.2 mg, 52%).

**<sup>1</sup>H NMR** (400 MHz, CDCl<sub>3</sub>): δ 7.83 – 7.75 (m, 1H), 7.60 – 7.55 (m, 1H), 7.46 – 7.38 (m, 2H), 7.21 – 7.16 (m, 2H), 6.90 – 6.84 (m, 2H), 4.24 (q, *J* = 7.1 Hz, 2H), 1.63 (s, 6H), 1.26 – 1.22 (m, 3H) ppm.

**<sup>13</sup>C NMR** (101 MHz, CDCl<sub>3</sub>): δ 174.1, 155.7, 149.3, 135.7, 132.1, 131.9, 130.6, 128.8, 127.8, 123.9, 118.7, 79.2, 61.5, 25.4, 14.0 ppm.

**HRMS** (ESI-TOF) m/z: [M+H]<sup>+</sup> Calcd for C<sub>18</sub>H<sub>20</sub>NO<sub>5</sub><sup>+</sup> 330.1336; found 330.1334.

### isopropyl 2-methyl-2-(4-(2'-nitro-[1,1'-biphenyl]-4-carbonyl)phenoxy)propanoate (66)

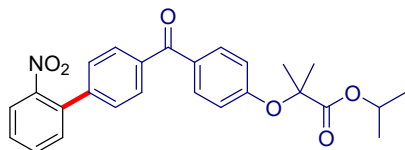

Compound **66** was prepared following the procedure **A**, starting from 5-(4-(4-((1-isopropoxy-2-methyl-1-oxopropan-2-yl)oxy)benzoyl)phenyl)-5H-thianthren-5-ium trifluoromethanesulfonate (138.1 mg, 0.2 mmol) and potassium 2-nitrobenzoate (49.2 mg, 0.24 mmol). After column chromatography on silica (Petroleum Ether: EtOAc = 10:1), **66** was afforded as green oil liquid (44.7 mg, 50%).

**<sup>1</sup>H NMR** (400 MHz, CDCl<sub>3</sub>): δ 7.95 – 7.90 (m, 1H), 7.83 – 7.77 (m, 4H), 7.68 – 7.63 (m, 1H), 7.56 – 7.50 (m, 1H), 7.47 – 7.44 (m, 1H), 7.44 – 7.39 (m, 2H), 6.90 – 6.85 (m, 2H), 5.16 – 5.04 (m, 1H), 1.66 (s, 6H), 1.21 (d, *J* = 6.4 Hz, 6H) ppm.

**<sup>13</sup>C NMR** (101 MHz, CDCl<sub>3</sub>): δ 194.8, 173.1, 159.7, 148.9, 141.1, 137.7, 135.5, 132.6, 132.0, 131.8, 130.3, 130.0, 128.8, 127.8, 124.3, 117.2, 79.4, 69.3, 25.3, 21.5 ppm.

**HRMS** (ESI-TOF) m/z: [M+H]<sup>+</sup> Calcd for C<sub>26</sub>H<sub>26</sub>NO<sub>6</sub><sup>+</sup> 448.1755; found 448.1755.

## One-pot Subsequent Decarboxylative Arylation

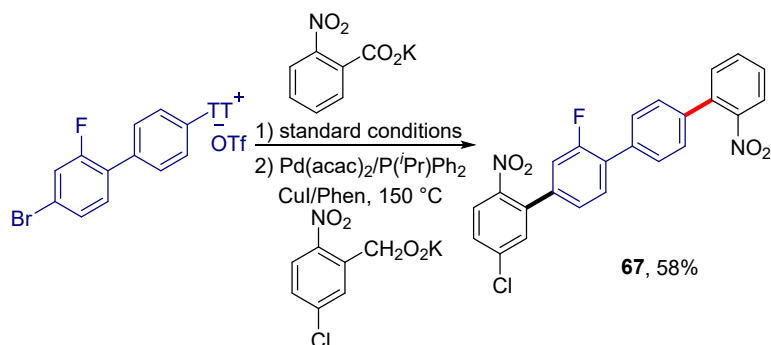

**Procedure B:** An oven-dried vessel was charged with arylthianthrenium salts (0.20 mmol, 1.0 equiv.), potassium carboxylate (0.24 mmol, 1.2 equiv.), Pd(OAc)<sub>2</sub> (1.2 mg, 5.00 μmol, 0.025 equiv.), CuI (1.9 mg, 0.01 mmol, 0.05 equiv.), and bpy (1.6 mg, 0.01 mmol, 0.05 equiv.). Under an argon atmosphere, DMSO (1 mL) was added via syringe, and the resulting mixture was stirred at 120 °C for 16 h. Subsequently, potassium 5-chloro-2-nitrobenzoate (71.0 mg, 0.30 mmol, 1.5 equiv.), Pd(acac)<sub>2</sub> (3.0 mg, 10.0 μmol, 0.05 equiv.), P(Pr)<sub>3</sub> (2.5 mg, 10.0 μmol, 0.05 equiv.), CuI (3.8 mg, 0.02 mmol, 0.10 equiv.), and Phen (3.6 mg, 0.02 mmol, 0.10 equiv.) were added under argon. The reaction mixture was then stirred at 150 °C for an additional 16 h. After cooling, the mixture was diluted with brine (10 mL) and extracted with ethyl acetate (3 × 20 mL). The combined organic extracts were dried over MgSO<sub>4</sub>, filtered, and concentrated under reduced pressure. The crude product was purified to afford the corresponding product. Compound **67**, selected as an example, was obtained as a green oil (52.0 mg, 58%).

**5'''-chloro-2''-fluoro-2,2''-dinitro-1,1':4',1''':4'',1'''-quaterphenyl (67)**

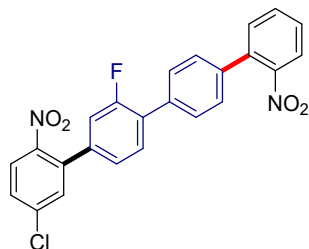

**<sup>1</sup>H NMR** (400 MHz, CDCl<sub>3</sub>): δ 7.95 – 7.87 (m, 2H), 7.68 – 7.63 (m, 3H), 7.59 – 7.51 (m, 3H), 7.51 – 7.48 (m, 2H), 7.45 – 7.42 (m, 2H), 7.20 – 7.12 (m, 2H) ppm.

**<sup>13</sup>C NMR** (101 MHz, CDCl<sub>3</sub>): δ 159.6 (d, *J* = 251.5 Hz), 149.2, 147.1, 138.8, 137.4 (d, *J* = 8.2 Hz), 137.1, 136.6 (d, *J* = 2.0 Hz), 135.8, 134.8, 132.4, 132.0, 131.8, 131.0 (d, *J* = 3.9 Hz), 129.3 (d, *J* = 3.0 Hz), 128.8, 128.7, 128.4, 128.1, 125.9, 124.2, 124.0 (d, *J* = 3.0 Hz), 115.9 (d, *J* = 25.2 Hz) ppm.

**<sup>19</sup>F NMR** (377 MHz, CDCl<sub>3</sub>): δ – 116.5 ppm.

**HRMS** (ESI-TOF) *m/z*: [M+H]<sup>+</sup> Calcd for C<sub>24</sub>H<sub>15</sub>ClFN<sub>2</sub>O<sub>4</sub><sup>+</sup> 449.0699; Found 449.0692.

**NO<sub>2</sub> as a Leaving Group in Suzuki-Miyaura Coupling**

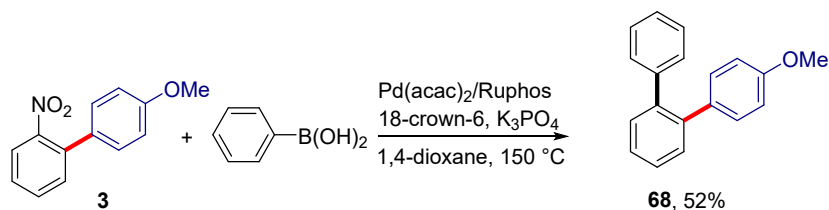

## SUPPORTING INFORMATION

**Procedure C:**<sup>[4]</sup> An oven-dried vessel was charged with compound **3** (46 mg, 0.20 mmol, 1.0 equiv.), phenylboronic acid (61.0 mg, 0.50 mmol, 2.5 equiv.), Pd(acac)<sub>2</sub> (6.2 mg, 0.02 mmol, 0.1 equiv.), Ruphos (19.2 mg, 0.04 mmol, 0.2 equiv.), 18-crown-6 (5.3 mg, 0.02 mmol, 0.1 equiv.), and K<sub>3</sub>PO<sub>4</sub> (127 mg, 0.6 mmol, 3.0 equiv.). Under an inert atmosphere, 1,4-dioxane (2 mL) was added via syringe. The resulting mixture was stirred at 150 °C for 24 h. Upon completion, the reaction was quenched with brine (10 mL) and extracted with ethyl acetate (3 × 20 mL). The combined organic extracts were dried over MgSO<sub>4</sub>, filtered, and concentrated under reduced pressure. The residue was purified by column chromatography (SiO<sub>2</sub>, ethyl acetate/cyclohexane gradient) to afford the corresponding product **68** as an oil liquid (27.0 mg, 52%).

### 4-methoxy-1,1':2',1''-terphenyl (**68**)

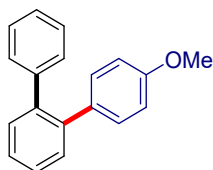

<sup>1</sup>H NMR (400 MHz, CDCl<sub>3</sub>): δ 7.60 – 7.49 (m, 4H), 7.47 – 7.39 (m, 3H), 7.34 – 7.29 (m, 1H), 7.28 – 7.04 (m, 3H), 7.01 – 6.98 (m, 2H), 3.86 (s, 3H) ppm.

Spectra data are consistent with the reported literature.<sup>4</sup>

### Gram-scale diazonium salt synthesis

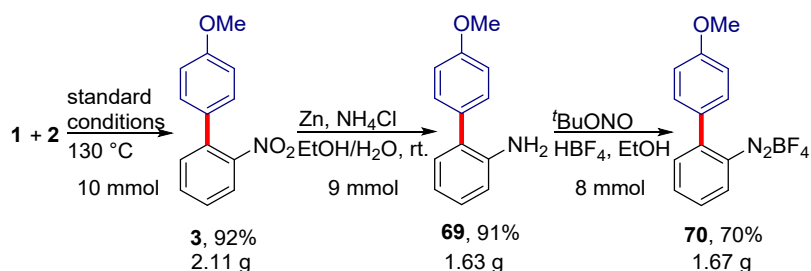

**Procedure D:**<sup>5</sup> An oven-dried vessel was charged with arylthianthrenium salts (10.0 mmol, 1.0 equiv.), potassium carboxylate (12.0 mmol, 1.2 equiv.), Pd(OAc)<sub>2</sub> (56 mg, 0.25 mmol, 0.025 equiv.), CuI (95.0 mg, 0.5 mmol, 0.05 equiv.), and bpy (80.0 mg, 0.5 mmol, 0.05 equiv.). Under an argon atmosphere, DMSO (50 mL) was added via syringe. The resulting reaction mixture was stirred at 130 °C for 16 h to afford compound **3** as a yellow solid (2.11 g, 92%). A separate oven-dried vessel was charged with Zn (3.00 g, 46.25 mmol, 5.0 equiv.), NH<sub>4</sub>Cl (5.00 g, 92.5 mmol, 10.0 equiv.), and compound **3**. Then, 40 mL of a mixed solvent (MeOH:H<sub>2</sub>O = 2:1) was added, and the mixture was stirred at room temperature for one hour to afford compound **69** as a brown oily liquid (1.63 g, 92%). Aniline was dissolved in absolute ethanol (4 mL), followed by the addition of HBF<sub>4</sub> (16 mmol, 2.0 equiv.). The mixture was cooled to 0 °C, and t-BuONO (16 mmol, 2.0 equiv.) was added. After stirring at room temperature for two hours, compound **70** was obtained as a bright orange solid (1.67 g, 67%).

### 4'-methoxy-[1,1'-biphenyl]-2-amine (**69**)

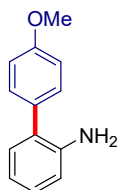

## SUPPORTING INFORMATION

**<sup>1</sup>H NMR** (400 MHz, CDCl<sub>3</sub>): δ 7.50 – 7.37 (m, 2H), 7.22 – 7.13 (m, 2H), 7.07 – 6.97 (m, 2H), 6.90 – 6.83 (m, 1H), 6.83 – 6.74 (m, 1H), 3.88 (s, 3H), 3.79 (s, 2H) ppm.

**<sup>13</sup>C NMR** (101 MHz, CDCl<sub>3</sub>): δ 158.6, 143.5, 131.6, 130.4, 130.1, 128.1, 127.3, 118.6, 115.5, 114.1, 55.2 ppm.

Spectra data are consistent with the reported literature.<sup>5</sup>

### 4'-methoxy-[1,1'-biphenyl]-2-diazonium tetrafluoroborate (70)

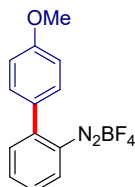

**<sup>1</sup>H NMR** (400 MHz, D<sub>2</sub>O): δ 8.63 – 8.61 (m, 1H), 8.33 – 8.28 (m, 1H), 8.01 – 7.99 (m, 1H), 7.92 – 7.89 (m, 1H), 7.72 – 7.69 (m, 2H), 7.29 – 7.27 (m, 2H), 3.96 (s, 3H) ppm.

Spectra data are consistent with the reported literature.<sup>6</sup>

### Further Derivatization from Diazonium Salts

#### 4-methoxy-1,1'-biphenyl (71)

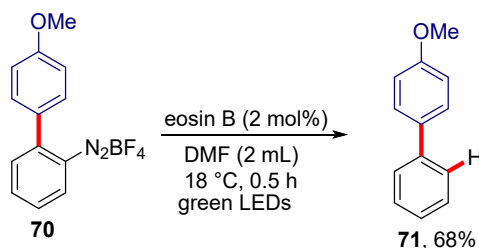

**Procedure E:**<sup>7</sup> A solution of arenediazonium tetrafluoroborate (0.25 mmol) and eosin B, disodium salt (3.2 mg, 5 μmol, 2 mol%) in DMF (2 mL) was prepared in the dark. The solution was degassed by bubbling nitrogen through it under vigorous stirring, and the vessel was sealed. The mixture was then irradiated with green LEDs for 30 min at ambient temperature. After dilution with diethyl ether (5 mL), the mixture was washed with water (5 mL). The aqueous layer was back-extracted with diethyl ether (2 × 5 mL), and the combined organic extracts were washed with brine (5 mL), dried over MgSO<sub>4</sub>, filtered, and concentrated under reduced pressure. Purification by column chromatography (SiO<sub>2</sub>, ethyl acetate/cyclohexane gradient) afforded compound **71** as a yellow solid (31.0 mg, 68%).

**M.P.:** 70 – 75 °C.

**<sup>1</sup>H NMR** (400 MHz, CDCl<sub>3</sub>): δ 7.63 – 7.53 (m, 4H), 7.48 – 7.41 (m, 2H), 7.36 – 7.31 (m, 1H), 7.03 – 6.99 (m, 2H), 3.87 (s, 3H) ppm.

**<sup>13</sup>C NMR** (101 MHz, CDCl<sub>3</sub>): δ 159.1, 140.8, 133.7, 128.7, 128.1, 126.7, 126.6, 114.2, 55.3 ppm.

Spectra data are consistent with the reported literature.<sup>7</sup>

**4'-methoxy-2-thiocyanato-1,1'-biphenyl (72)**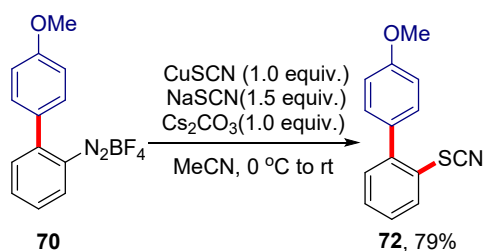

**Procedure F:**<sup>8</sup> Cesium carbonate (65.2 mg, 0.2 mmol), NaSCN (24.3 mg, 0.3 mmol), and CuSCN (24.5 mg, 0.2 mmol) were suspended in acetonitrile (0.67 M) and the mixture was cooled to 0 °C. A solution of arenediazonium tetrafluoroborate (0.2 mmol) in acetonitrile (0.40 M) was added to the suspension. The resulting mixture was stirred at 0 °C for 1 h and then at room temperature overnight. The reaction was quenched with diethyl ether (10 mL), and the mixture was filtered. The filtrate was washed with water (2 × 10 mL), dried over MgSO<sub>4</sub>, and concentrated under reduced pressure. The residue was purified by column chromatography (SiO<sub>2</sub>, ethyl acetate/cyclohexane gradient) to afford compound **72** as a white solid (38.1 mg, 79%).

**M.P.:** 58 – 63 °C.

**<sup>1</sup>H NMR** (400 MHz, CDCl<sub>3</sub>): δ 7.80 – 7.72 (m, 1H), 7.45 – 7.39 (m, 2H), 7.35 – 7.30 (m, 1H), 7.27 – 7.23 (m, 2H), 7.01 – 6.97 (m, 2H), 3.87 (s, 3H) ppm.

**<sup>13</sup>C NMR** (101 MHz, CDCl<sub>3</sub>): δ 159.8, 141.9, 131.1, 130.8, 130.2, 129.2, 128.9, 128.8, 124.3, 114.1, 110.8, 55.3 ppm.

Spectra data are consistent with the reported literature.<sup>8</sup>

**2-iodo-4'-methoxy-1,1'-biphenyl (73)**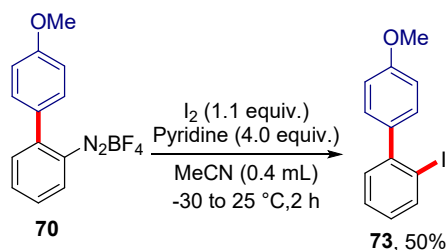

**Procedure G:**<sup>9</sup> Pyridine (63 mg, 0.8 mmol, 4.0 equiv) was added dropwise over 30 seconds to a cooled (-30 °C) mixture of arenediazonium tetrafluoroborate (0.2 mmol), I<sub>2</sub> (56 mg, 0.22 mmol, 1.1 equiv) in MeCN (0.4 mL). After warming to room temperature over 2 h, the mixture was concentrated. The residue was diluted with Et<sub>2</sub>O (5 mL) and the organic phase was washed with Na<sub>2</sub>S<sub>2</sub>O<sub>3</sub> (1 M, 5 mL) and brine (5 mL). The combined organic extracts were dried (MgSO<sub>4</sub>), filtered, and concentrated. Purification by flash chromatography (ethyl acetate/cyclohexane gradient) yielded compound **73** as a brown oil (31.0 mg, 50%).

**<sup>1</sup>H NMR** (400 MHz, CDCl<sub>3</sub>): δ 7.95 (d, *J* = 7.9 Hz, 1H), 7.42 – 7.35 (m, 1H), 7.31 – 7.25 (m, 3H), 7.03 – 6.93 (m, 3H), 3.86 (s, 3H) ppm.

**<sup>13</sup>C NMR** (101 MHz, CDCl<sub>3</sub>): δ 159.1, 146.3, 139.5, 136.7, 130.4, 130.2, 128.5, 128.1, 113.3, 99.2, 55.3 ppm.

Spectra data are consistent with the reported literature.<sup>10</sup>

## SUPPORTING INFORMATION

### (E)-4'-methoxy-2-styryl-1,1'-biphenyl (**74**)

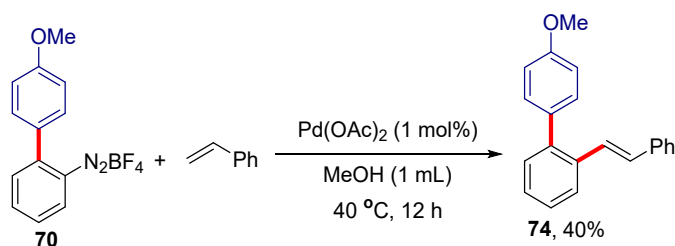

**Procedure H:**<sup>11</sup> A mixture of styrene (21 mg, 0.2 mmol, 1.0 equiv) and arenediazonium tetrafluoroborate (71 mg, 0.24 mmol, 1.2 equiv) in MeOH (1 mL) with Pd(OAc)<sub>2</sub> (0.5 mg, 1 mol%) was stirred at 40 °C for 12 h. The reaction was then quenched with brine (5 mL) and extracted with ethyl acetate (3 × 6 mL). The combined organic extracts were dried over MgSO<sub>4</sub>, filtered, and concentrated under reduced pressure. Purification by column chromatography (SiO<sub>2</sub>, petroleum ether/EtOAc = 10:1) afforded compound **74** as a yellow oil (22.9 mg, 40%).

**<sup>1</sup>H NMR** (400 MHz, CDCl<sub>3</sub>): δ 7.80 – 7.71 (m, 1H), 7.44 – 7.30 (m, 9H), 7.26 – 7.20 (m, 1H), 7.18 – 7.13 (m, 1H), 7.09 – 7.02 (m, 1H), 7.02 – 6.95 (m, 2H), 3.88 (s, 3H) ppm.

**<sup>13</sup>C NMR** (101 MHz, CDCl<sub>3</sub>): δ 158.8, 140.8, 137.7, 135.4, 133.2, 131.0, 130.2, 129.2, 128.6, 128.0, 127.5, 127.4, 127.2, 126.5, 125.9, 113.6, 55.3 ppm.

Spectra data are consistent with the reported literature.<sup>11</sup>

### diethyl (4'-methoxy-[1,1'-biphenyl]-2-yl)phosphonate (**75**)

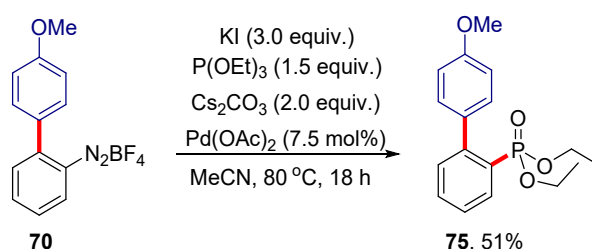

**Procedure I:**<sup>12</sup> A mixture of aryl diazonium salt (0.2 mmol, 59.6 mg) and KI (0.6 mmol, 100.0 mg) in anhydrous MeCN (0.4 mL) was stirred under an argon atmosphere. To this mixture were added Pd(OAc)<sub>2</sub> (0.015 mmol, 3.5 mg), P(OEt)<sub>3</sub> (0.3 mmol, 50.0 mg), and Cs<sub>2</sub>CO<sub>3</sub> (0.4 mmol, 131.0 mg), followed by additional MeCN (0.8 mL). The reactor was protected from light with aluminum foil and the reaction mixture was stirred at 80 °C for 18 h under argon. After cooling to room temperature, the mixture was diluted with EtOAc, washed with brine, dried over Na<sub>2</sub>SO<sub>4</sub>, and concentrated under reduced pressure. The residue was purified by column chromatography (SiO<sub>2</sub>, ethyl acetate/cyclohexane gradient) to afford compound **75** as a brown solid (32.7 mg, 51%).

**M.P.:** 93 – 97 °C.

**<sup>1</sup>H NMR** (400 MHz, CDCl<sub>3</sub>): δ 7.39 – 7.30 (m, 2H), 7.29 – 7.26 (m, 2H), 7.10 (d, J = 7.5 Hz, 1H), 7.01 – 6.95 (m, 2H), 6.94 – 6.88 (m, 1H), 4.17 – 4.01 (m, 4H), 3.85 (s, 3H), 1.27 – 1.22 (m, 6H) ppm.

**<sup>13</sup>C NMR** (101 MHz, CDCl<sub>3</sub>): δ 159.1, 145.2, 130.4, 130.3, 130.2, 128.2, 127.3, 120.2, 114.2, 112.9, 63.4, 63.3, 55.3, 16.1, 16.1 ppm.

Spectra data are consistent with the reported literature.<sup>12</sup>

4'-methoxy-2-(phenylethynyl)-1,1'-biphenyl (**76**)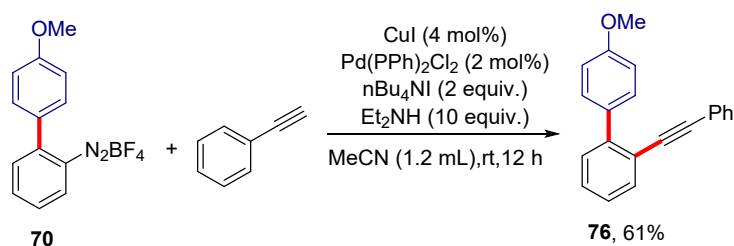

**Procedure J:**<sup>9</sup> An oven-dried Schlenk tube was charged under an argon atmosphere with arenediazonium salt (0.2 mmol), n-Bu<sub>4</sub>NI (0.4 mmol), PdCl<sub>2</sub>(PPh<sub>3</sub>)<sub>2</sub> (0.004 mmol), CuI (0.008 mmol), diethylamine (2.0 mmol), phenylacetylene (0.4 mmol), and anhydrous MeCN (1.2 mL). The tube was sealed and the mixture was stirred at room temperature for 12 h. Upon completion, the reaction mixture was diluted with Et<sub>2</sub>O, washed sequentially with HCl (1 M, twice) and a saturated NaCl solution. The organic phase was separated, dried over Na<sub>2</sub>SO<sub>4</sub>, filtered, and concentrated under reduced pressure. The residue was purified by silica gel chromatography (eluent: n-hexane/AcOEt) to afford compound **76** as a yellow waxy liquid (34.7 mg, 61%).

**<sup>1</sup>H NMR** (400 MHz, CDCl<sub>3</sub>): δ 7.69 – 7.60 (m, 3H), 7.44 – 7.36 (m, 4H), 7.34 – 7.27 (m, 4H), 7.01 (d, *J* = 8.9 Hz, 2H), 3.88 (s, 3H) ppm.

**<sup>13</sup>C NMR** (101 MHz, CDCl<sub>3</sub>): δ 159.1, 143.4, 133.0, 132.9, 131.3, 130.5, 129.3, 128.5, 128.2, 128.0, 126.6, 123.5, 121.4, 113.3, 92.1, 89.6, 55.3 ppm.

Spectra data are consistent with the reported literature.<sup>9</sup>

2-methoxy-10-phenylphenanthrene (**77**)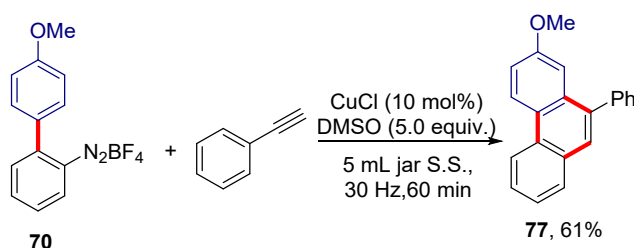

**Procedure K:**<sup>5</sup> A 5.0 mL Retsch stainless steel milling jar was charged with arenediazonium tetrafluoroborate (0.2 mmol, 1.0 equiv.), phenylacetylene (0.6 mmol, 3.0 equiv.), cuprous chloride (0.02 mmol, 10 mol%), and DMSO (1.0 mmol, 5.0 equiv.) under air. A stainless-steel ball (2.8 g) was then introduced, and the mixture was milled at 30 Hz for 1 hour. Upon completion, the reaction mixture was quenched with dichloromethane. The organic layer was concentrated under reduced pressure and purified by silica gel chromatography (eluent: EtOAc/hexane) to afford the desired product. Compound **77** was obtained as a light yellow oil (34.7 mg, 61%).

**<sup>1</sup>H NMR** (400 MHz, CDCl<sub>3</sub>): δ 8.69 (d, *J* = 8.9 Hz, 1H), 8.63 (d, *J* = 8.3 Hz, 1H), 7.88 (d, *J* = 7.8 Hz, 1H), 7.72 – 7.63 (m, 2H), 7.60 – 7.51 (m, 5H), 7.50 – 7.45 (m, 1H), 7.35 – 7.30 (m, 2H), 3.81 (s, 3H) ppm.

**<sup>13</sup>C NMR** (101 MHz, CDCl<sub>3</sub>): δ 158.2, 140.9, 138.2, 132.5, 130.6, 130.1, 129.9, 128.6, 128.4, 128.1, 127.4, 126.7, 125.9, 125.0, 124.5, 122.0, 116.3, 107.9, 55.3 ppm.

Spectra data are consistent with the reported literature.<sup>5</sup>

## Synthesis of Fungicides

## Synthesis of Boscalid

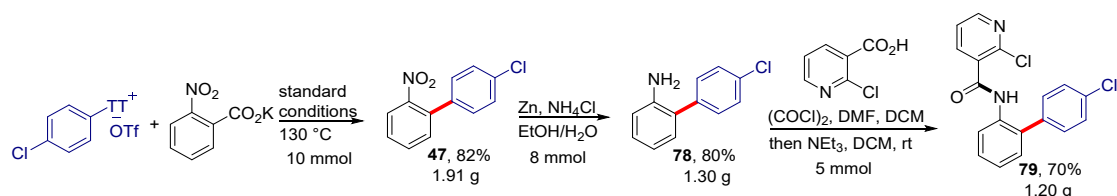

**Procedure L:** An oven-dried vessel was charged with arylthianthrenium salts (10.0 mmol, 1 equiv.), potassium carboxylate (12.0 mmol, 1.2 equiv.), Pd(OAc)<sub>2</sub> (56 mg, 0.25 mmol, 0.025 equiv.), CuI (95.0 mg, 0.5 mmol, 0.05 equiv.), and bpy (80.0 mg, 0.5 mmol, 0.05 equiv.). Under an argon atmosphere, DMSO (50 mL) was added via syringe. The resulting reaction mixture was stirred at 130 °C for 16 h. Compound **47** was obtained as a yellow solid (1.91 g, 82%). A separate oven-dried vessel was charged with Zn (40.0 mmol, 5.0 equiv.), NH<sub>4</sub>Cl (80 mmol, 10.0 equiv.), and compound **47** (8 mmol, 1.0 equiv.). Then, 40 mL of a mixed solvent (MeOH:H<sub>2</sub>O = 2:1) was added. The mixture was stirred at room temperature for one hour. Compound **78** was obtained as a brown oily liquid (1.30 g, 80%). 2-Chloronicotinic acid (6.0 mmol, 1.0 equiv.) was suspended in DCM (0.2 M), followed by the addition of two drops of DMF. Oxalyl chloride (9 mmol, 1.5 equiv.) was added dropwise to the mixture at 0 °C. The reaction was allowed to proceed at room temperature for 3.5 hours, after which the volatiles were removed under reduced pressure. The resulting acyl chloride (6 mmol, 1.2 equiv.) and aniline (5 mmol, 1.0 equiv.) were dissolved in a mixture of ethyl acetate and water (EA:H<sub>2</sub>O = 2:1), followed by the addition of K<sub>2</sub>CO<sub>3</sub> (11.0 mmol, 2.2 equiv.). The reaction was stirred at room temperature for 20 hours. Compound **79** was obtained as a white solid (1.20 g, 70%).

**4'-chloro-[1,1'-biphenyl]-2-amine (78)**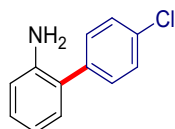

**<sup>1</sup>H NMR** (400 MHz, CDCl<sub>3</sub>): δ 7.50 – 7.36 (m, 4H), 7.23 – 7.17 (m, 1H), 7.12 (d, *J* = 7.6 Hz, 1H), 6.91 – 6.83 (m, 1H), 6.79 (d, *J* = 7.9 Hz, 1H), 3.81 (s, 2H) ppm.

**<sup>13</sup>C NMR** (101 MHz, CDCl<sub>3</sub>): δ 143.1, 137.8, 133.0, 130.4, 130.3, 128.9, 128.8, 126.3, 118.8, 115.8 ppm.

**HRMS** (ESI-TOF) *m/z*: [M+H]<sup>+</sup> Calcd for C<sub>12</sub>H<sub>11</sub>ClN<sup>+</sup> 204.0575; found 204.0573.

**2-chloro-N-(4'-chloro-[1,1'-biphenyl]-2-yl)nicotinamide (79)**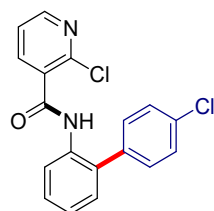

**M.P.:** 142 – 145 °C.

**<sup>1</sup>H NMR** (400 MHz, CDCl<sub>3</sub>): δ 8.47 – 8.34 (m, 2H), 8.19 – 8.06 (m, 2H), 7.48 – 7.39 (m, 3H), 7.36 – 7.30 (m, 3H), 7.26 (d, *J* = 5.2 Hz, 2H) ppm.

**<sup>13</sup>C NMR** (101 MHz, CDCl<sub>3</sub>): δ 162.5, 151.3, 146.7, 140.1, 136.2, 134.4, 134.3, 132.2, 131.0, 130.8, 130.2, 129.3, 128.9, 125.3, 122.9, 122.1 ppm.

**HRMS** (ESI-TOF) *m/z*: [M+H]<sup>+</sup> Calcd for C<sub>18</sub>H<sub>13</sub>Cl<sub>2</sub>N<sub>2</sub>O<sup>+</sup> 343.0399; found 343.0392.

## Synthesis of Bixafen

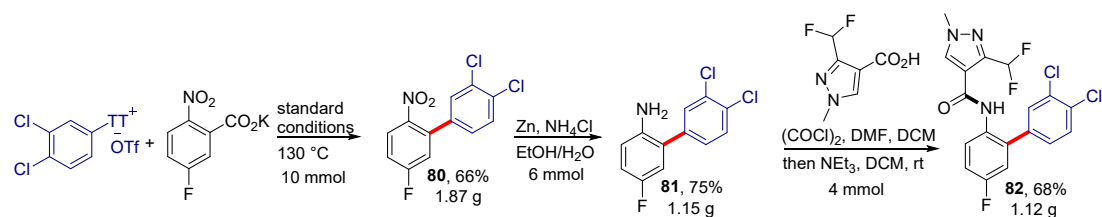

**Procedure M:** An oven-dried vessel was charged with arylthianthrenium salts (10.0 mmol, 1.0 equiv.), potassium carboxylate (12.0 mmol, 1.2 equiv.), Pd(OAc)<sub>2</sub> (56 mg, 0.25 mmol, 0.025 equiv.), CuI (95.0 mg, 0.5 mmol, 0.05 equiv.), and bpy (80.0 mg, 0.5 mmol, 0.05 equiv.). Under an argon atmosphere, DMSO (50 mL) was added via syringe. The resulting reaction mixture was stirred at 130 °C for 16 h to afford compound **80** as a yellow solid (1.87 g, 66%). A separate oven-dried vessel was charged with Zn (30.0 mmol, 5.0 equiv.), NH<sub>4</sub>Cl (60 mmol, 10.0 equiv.), and compound **80** (6 mmol, 1.0 equiv.). Then, 35 mL of a mixed solvent (MeOH:H<sub>2</sub>O = 2:1) was added. The mixture was stirred at room temperature for one hour to afford compound **81** as a brown waxy liquid (1.51 g, 75%). 3-(Difluoromethyl)-1-methyl-1H-pyrazole-4-carboxylic acid (6.0 mmol, 1.0 equiv.) was suspended in DCM (0.2 M). Two drops of DMF were added, followed by the dropwise addition of oxalyl chloride (9 mmol, 1.5 equiv.) at 0 °C. The reaction mixture was stirred at room temperature for 3.5 hours, after which the volatiles were removed under reduced pressure. The resulting acyl chloride (4.8 mmol, 1.2 equiv.) and aniline (4 mmol, 1.0 equiv.) were dissolved in a mixture of ethyl acetate and water (EA:H<sub>2</sub>O = 2:1), and K<sub>2</sub>CO<sub>3</sub> (8.8 mmol, 2.2 equiv.) was added. The reaction was stirred at room temperature for 20 hours to afford compound **82** as a brown solid (1.12 g, 68%).

**3',4'-dichloro-5-fluoro-2-nitro-1,1'-biphenyl (80)**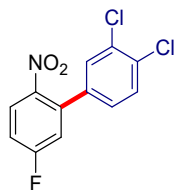

**M.P.:** 83 – 87 °C.

**<sup>1</sup>H NMR** (400 MHz, CDCl<sub>3</sub>): δ 8.01 (dd, *J* = 9.0, 5.0 Hz, 1H), 7.50 (d, *J* = 8.3 Hz, 1H), 7.41 (d, *J* = 2.1 Hz, 1H), 7.25 – 7.19 (m, 1H), 7.15 – 7.07 (m, 2H) ppm.

**<sup>13</sup>C NMR** (101 MHz, CDCl<sub>3</sub>): δ 164.0 (d, *J* = 259.0 Hz), 144.7, 137.2 (d, *J* = 9.3 Hz), 136.5 (d, *J* = 1.5 Hz), 133.0 (d, *J* = 18.1 Hz), 130.6, 129.6, 127.4 (d, *J* = 9.3 Hz), 127.1, 118.8 (d, *J* = 23.6 Hz), 116.1, 115.9 (d, *J* = 23.2 Hz) ppm.

**<sup>19</sup>F NMR** (377 MHz, CDCl<sub>3</sub>): δ – 103.6 ppm.

**HRMS** (ESI-TOF) *m/z*: [M+H]<sup>+</sup> Calcd for C<sub>12</sub>H<sub>7</sub>Cl<sub>2</sub>FNO<sub>2</sub><sup>+</sup> 285.9832; found 285.9832.

**3',4'-dichloro-5-fluoro-[1,1'-biphenyl]-2-amine (81)**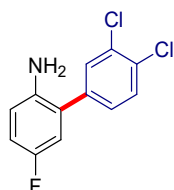

**<sup>1</sup>H NMR** (400 MHz, CDCl<sub>3</sub>): δ 7.62 – 7.46 (m, 2H), 7.33 – 7.27 (m, 1H), 6.94 – 6.86 (m, 1H), 6.85 – 6.78 (m, 1H), 6.77 – 6.66 (m, 1H), 3.79 (s, 2H) ppm.

## SUPPORTING INFORMATION

**<sup>13</sup>C NMR** (101 MHz, CDCl<sub>3</sub>): δ 156.3 (d, *J* = 238.8 Hz), 139.0 (d, *J* = 2.1 Hz), 138.3 (d, *J* = 2.1 Hz), 132.9, 131.8, 130.81, 130.79, 128.3, 126.1 (d, *J* = 7.4 Hz), 117.1 (d, *J* = 7.8 Hz), 116.4 (d, *J* = 22.9 Hz), 115.7 (d, *J* = 22.3 Hz) ppm.

**<sup>19</sup>F NMR** (377 MHz, CDCl<sub>3</sub>): δ – 126.5 ppm.

**HRMS** (ESI-TOF) *m/z*: [M+H]<sup>+</sup> Calcd for C<sub>12</sub>H<sub>9</sub>Cl<sub>2</sub>FN<sup>+</sup> 256.0091; found 256.0087.

### **N-(3',4'-dichloro-5-fluoro-[1,1'-biphenyl]-2-yl)-3-(difluoromethyl)-1-methyl-1H-pyrazole-4-carboxamide (82)**

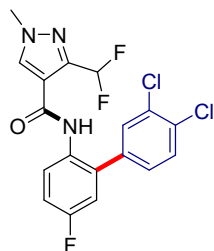

**M.P.:** 138 – 142 °C.

**<sup>1</sup>H NMR** (400 MHz, CDCl<sub>3</sub>): δ 8.04 – 7.98 (m, 1H), 7.84 (s, 1H), 7.77 (s, 1H), 7.50 – 7.43 (m, 2H), 7.19 – 7.15 (m, 1H), 7.11 – 7.06 (m, 1H), 6.98 – 6.93 (m, 1H), 6.85 – 6.55 (m, 1H), 3.88 (s, 3H) ppm.

**<sup>13</sup>C NMR** (101 MHz, CDCl<sub>3</sub>): δ 159.63 (d, *J* = 247.5 Hz), 159.57, 142.7 (t, *J* = 28.6 Hz), 137.1, 135.5, 134.0 (d, *J* = 9.2 Hz), 133.0, 132.5, 130.9, 130.8, 130.3 (d, *J* = 2.8 Hz), 128.4, 125.8 (d, *J* = 8.2 Hz), 116.7 (d, *J* = 23.2 Hz), 116.2, 115.5 (d, *J* = 22.2 Hz), 111.3 (t, *J* = 235.8 Hz), 39.5 ppm.

**<sup>19</sup>F NMR** (377 MHz, CDCl<sub>3</sub>): δ – 109.4, 116.3 ppm.

**HRMS** (ESI-TOF) *m/z*: [M+H]<sup>+</sup> Calcd for C<sub>18</sub>H<sub>13</sub>Cl<sub>2</sub>F<sub>3</sub>N<sub>3</sub>O<sub>2</sub><sup>+</sup> 414.0382; found 414.0378.

# SUPPORTING INFORMATION

## Copies of $^1\text{H}$ and $^{13}\text{C}$ NMR Spectra

$^1\text{H}$  NMR spectra (400 MHz) of **3** in  $\text{CDCl}_3$ .

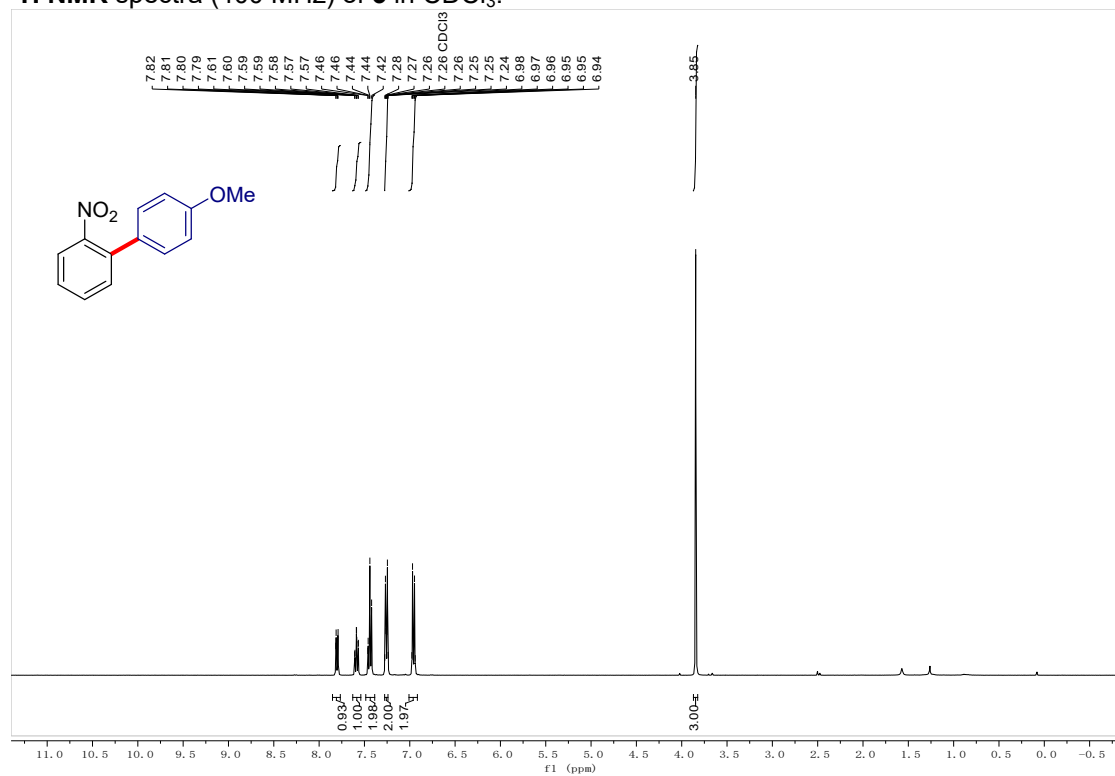

$^{13}\text{C}$  NMR spectra (101 MHz) of **3** in  $\text{CDCl}_3$ .

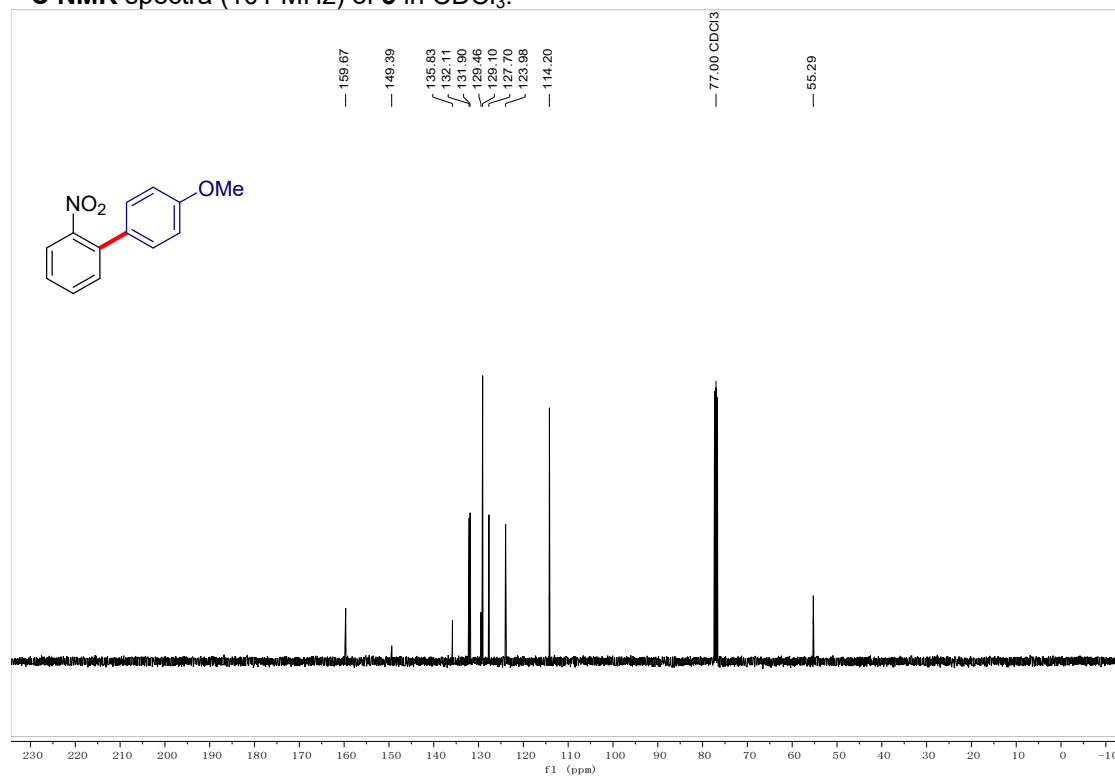

# SUPPORTING INFORMATION

<sup>1</sup>H NMR spectra (400 MHz) of **4** in CDCl<sub>3</sub>.

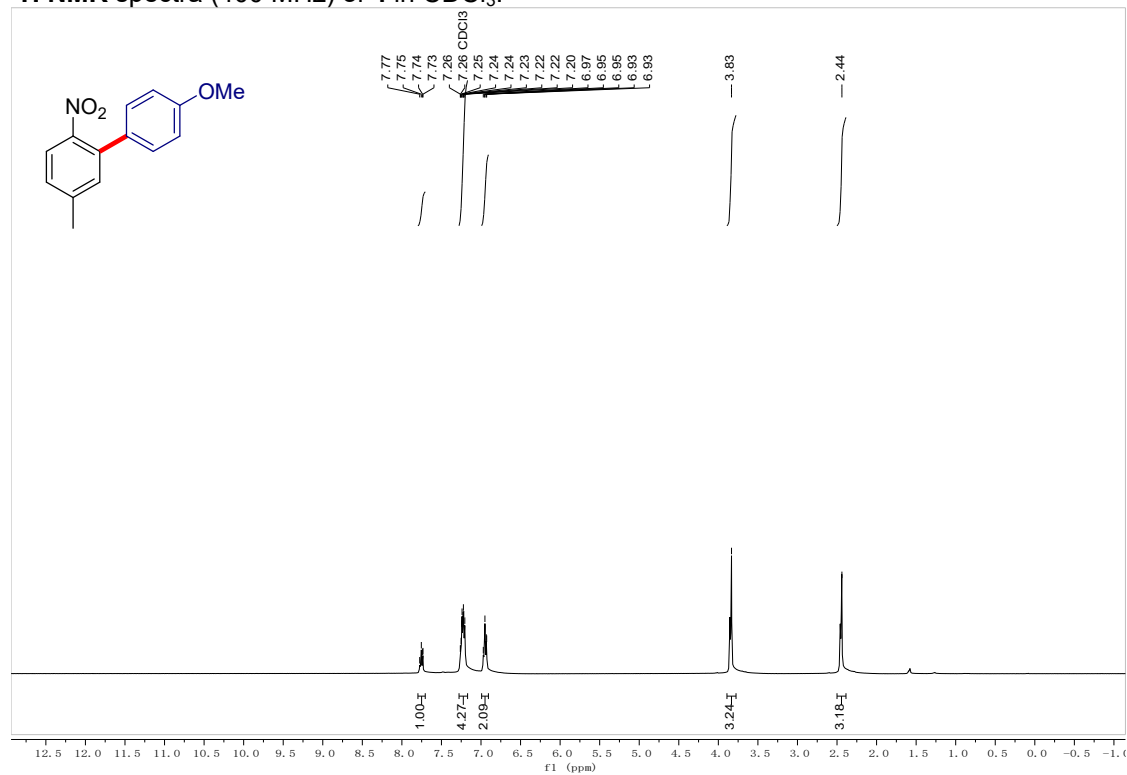

<sup>13</sup>C NMR spectra (101 MHz) of **4** in CDCl<sub>3</sub>.

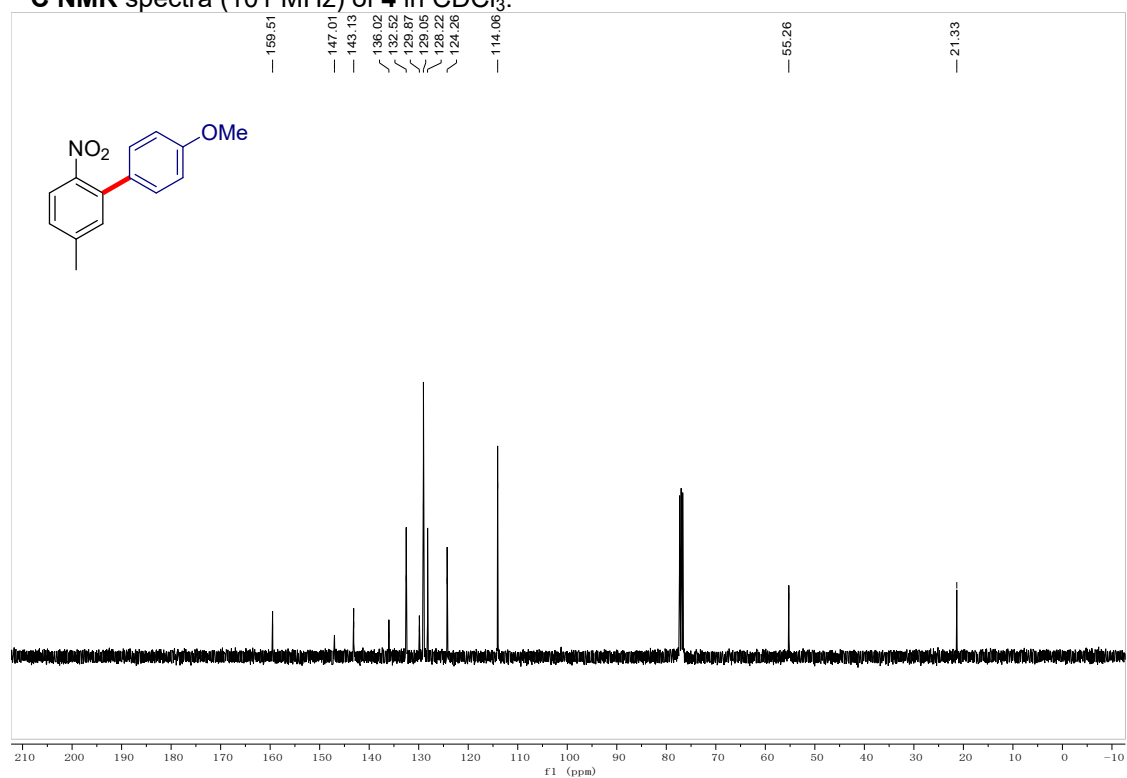

# SUPPORTING INFORMATION

<sup>1</sup>H NMR spectra (400 MHz) of **5** in CDCl<sub>3</sub>.

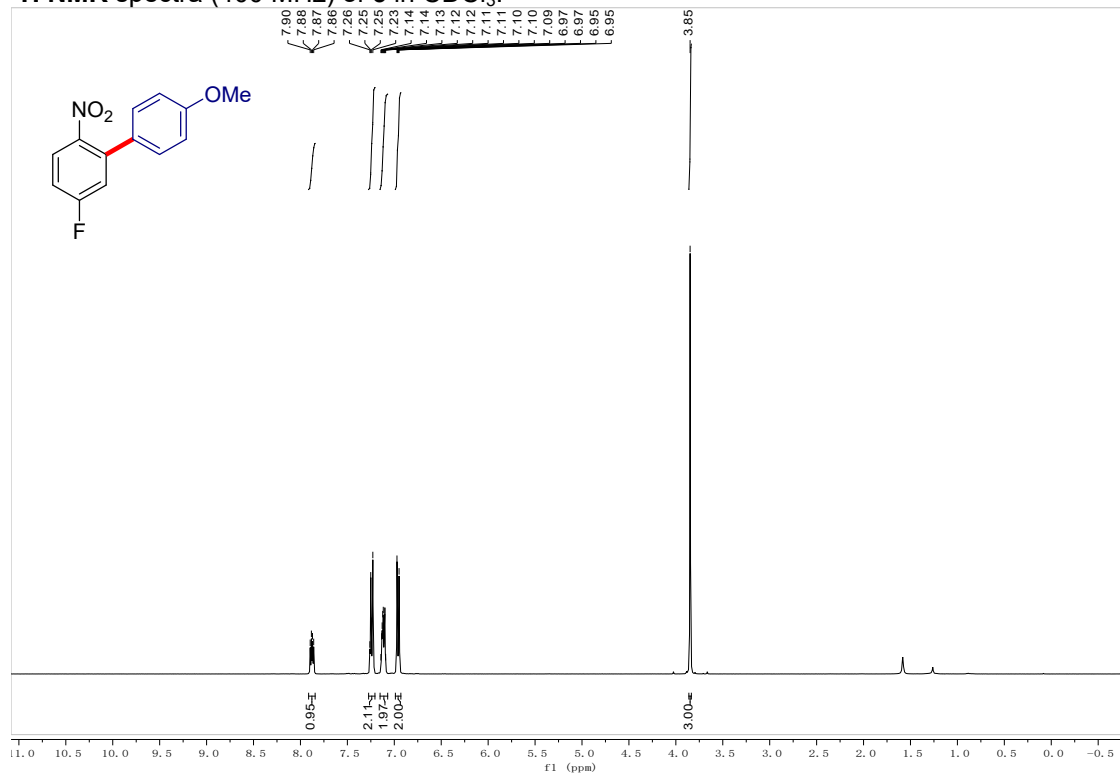

<sup>13</sup>C NMR spectra (101 MHz) of **5** in CDCl<sub>3</sub>.

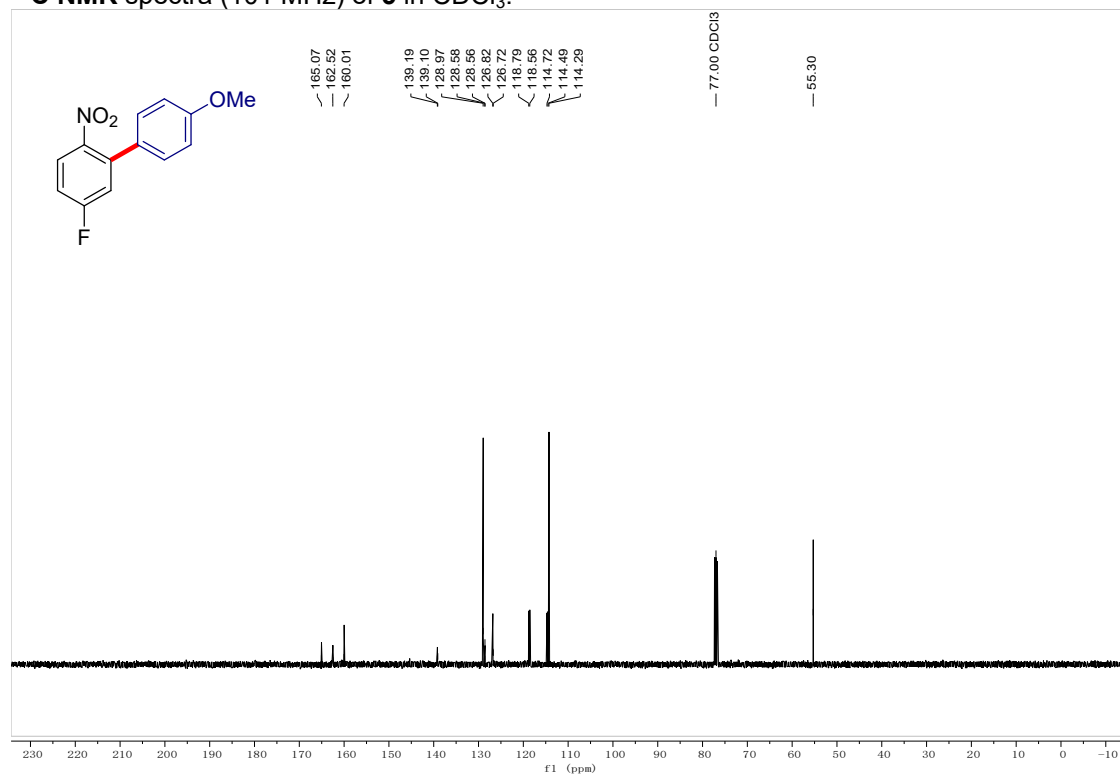

## SUPPORTING INFORMATION

$^{19}\text{F}$  NMR spectra (377 MHz) of **5** in  $\text{CDCl}_3$ .

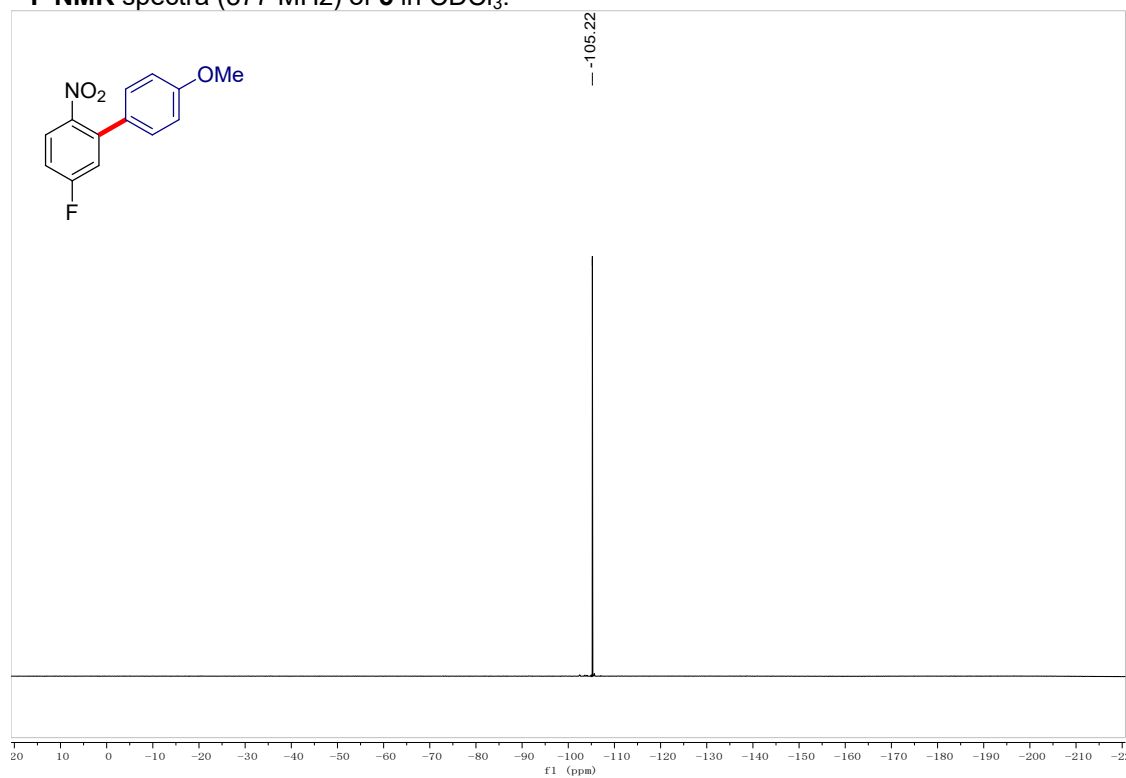

# SUPPORTING INFORMATION

<sup>1</sup>H NMR spectra (400 MHz) of **6** in CDCl<sub>3</sub>.

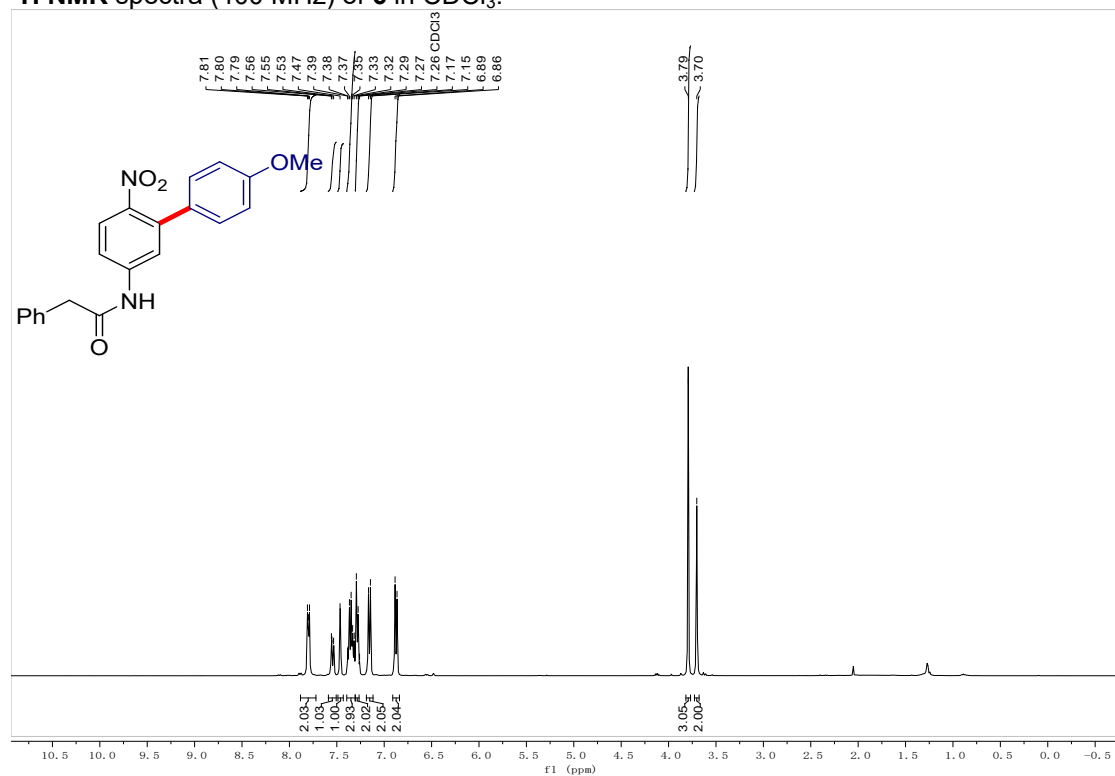

<sup>13</sup>C NMR spectra (101 MHz) of **6** in CDCl<sub>3</sub>.

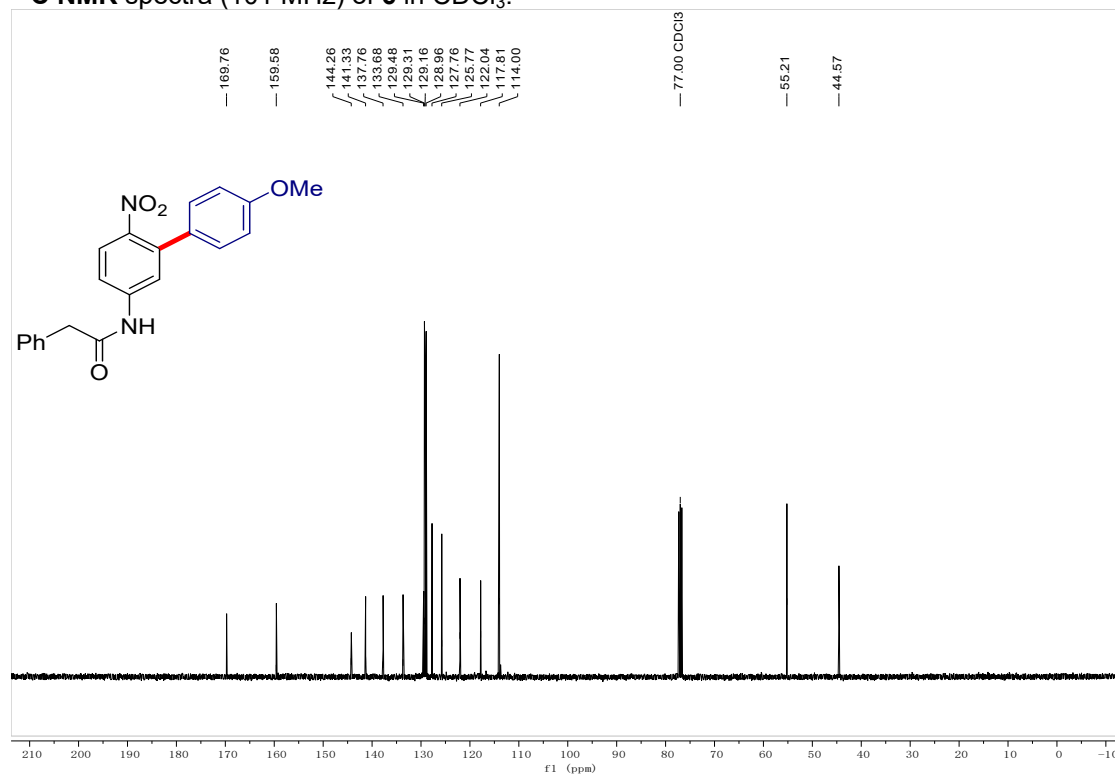

# SUPPORTING INFORMATION

<sup>1</sup>H NMR spectra (400 MHz) of **7** in CDCl<sub>3</sub>.

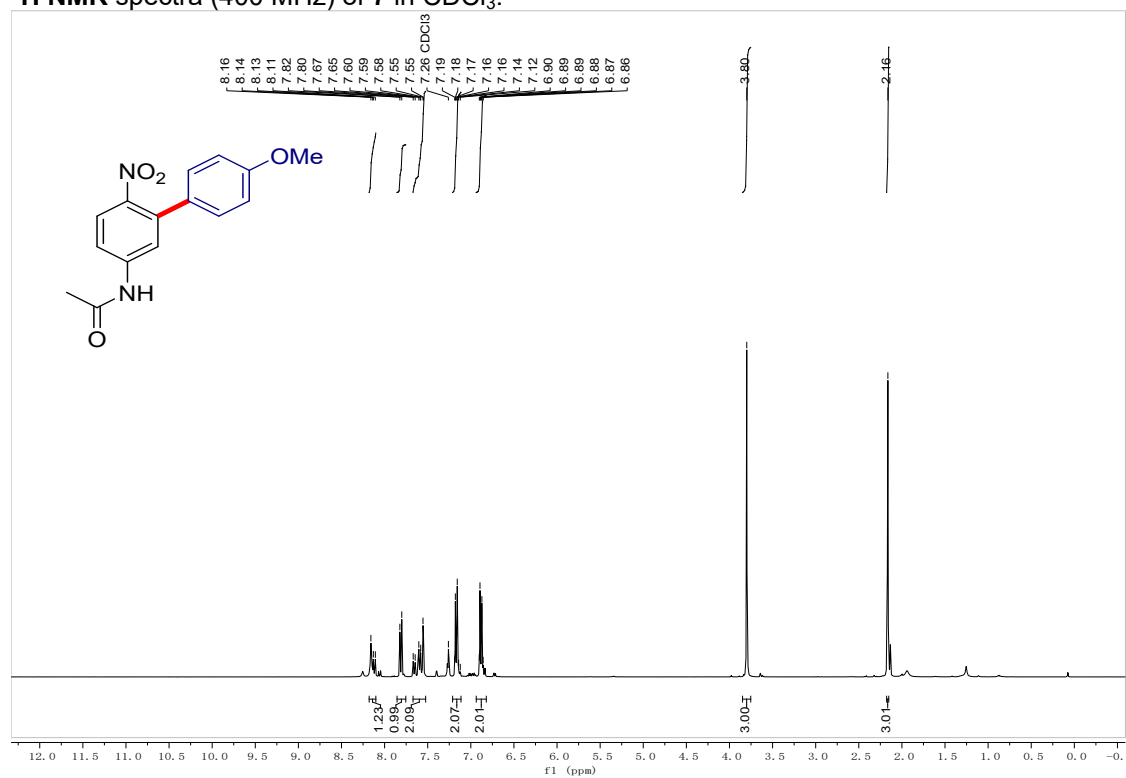

<sup>13</sup>C NMR spectra (101 MHz) of **7** in CDCl<sub>3</sub>.

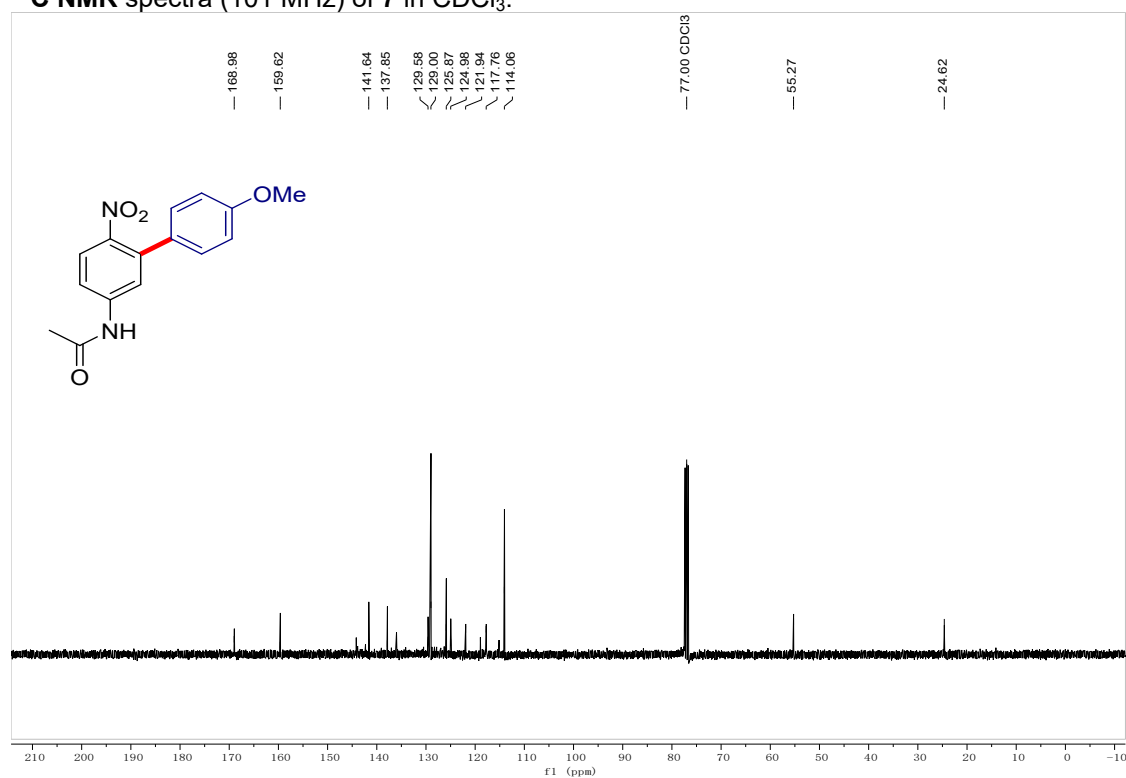

# SUPPORTING INFORMATION

**<sup>1</sup>H NMR spectra (400 MHz) of **8** in CDCl<sub>3</sub>.**

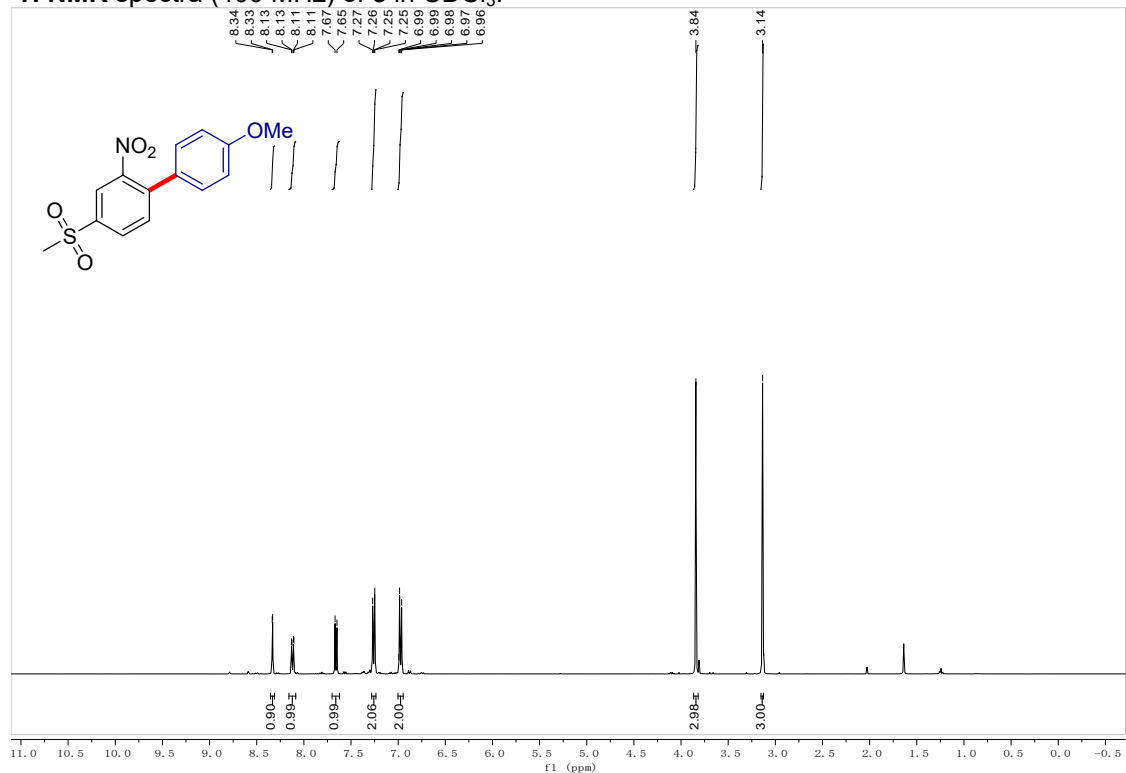

**<sup>13</sup>C NMR spectra (101 MHz) of **8** in CDCl<sub>3</sub>.**

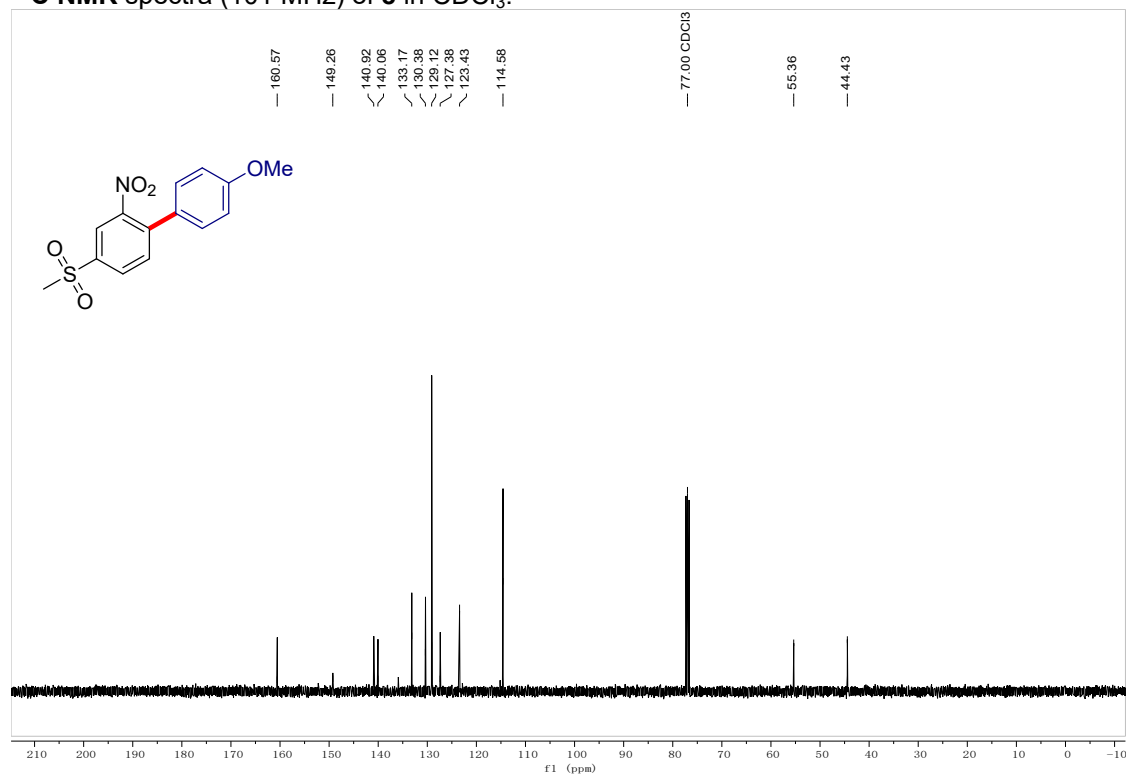

# SUPPORTING INFORMATION

$^1\text{H}$  NMR spectra (400 MHz) of **9** in  $\text{CDCl}_3$ .

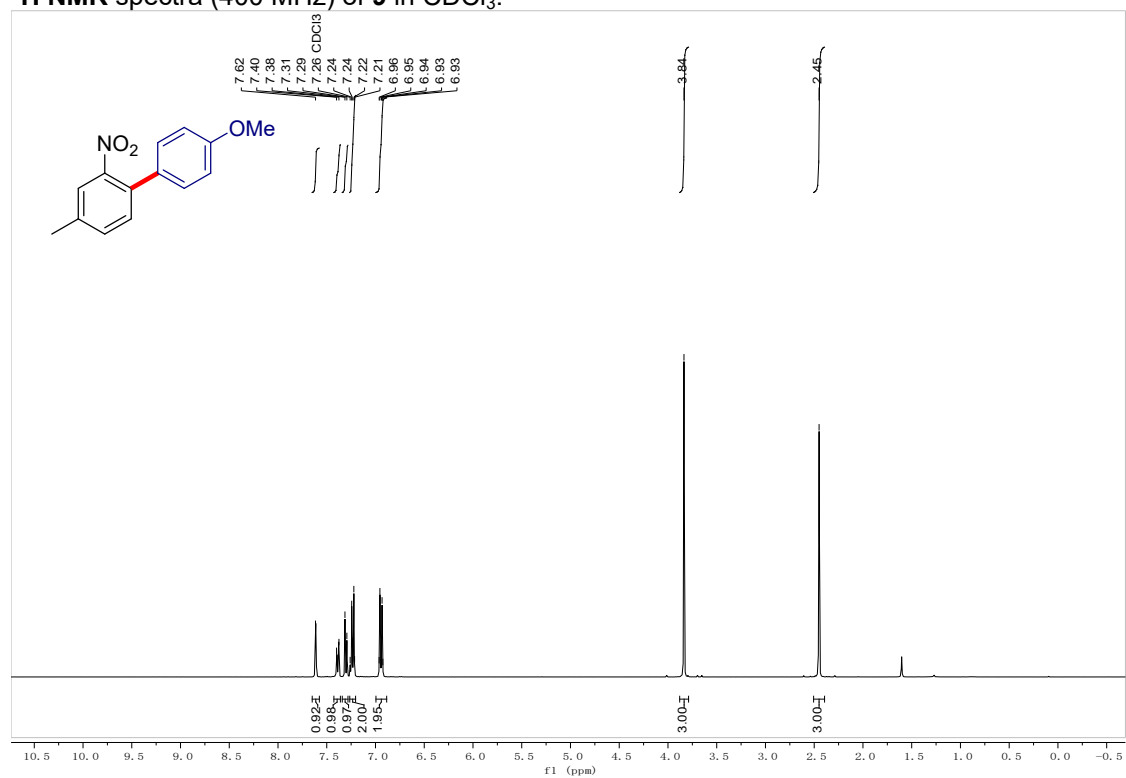

$^{13}\text{C}$  NMR spectra (101 MHz) of **9** in  $\text{CDCl}_3$ .

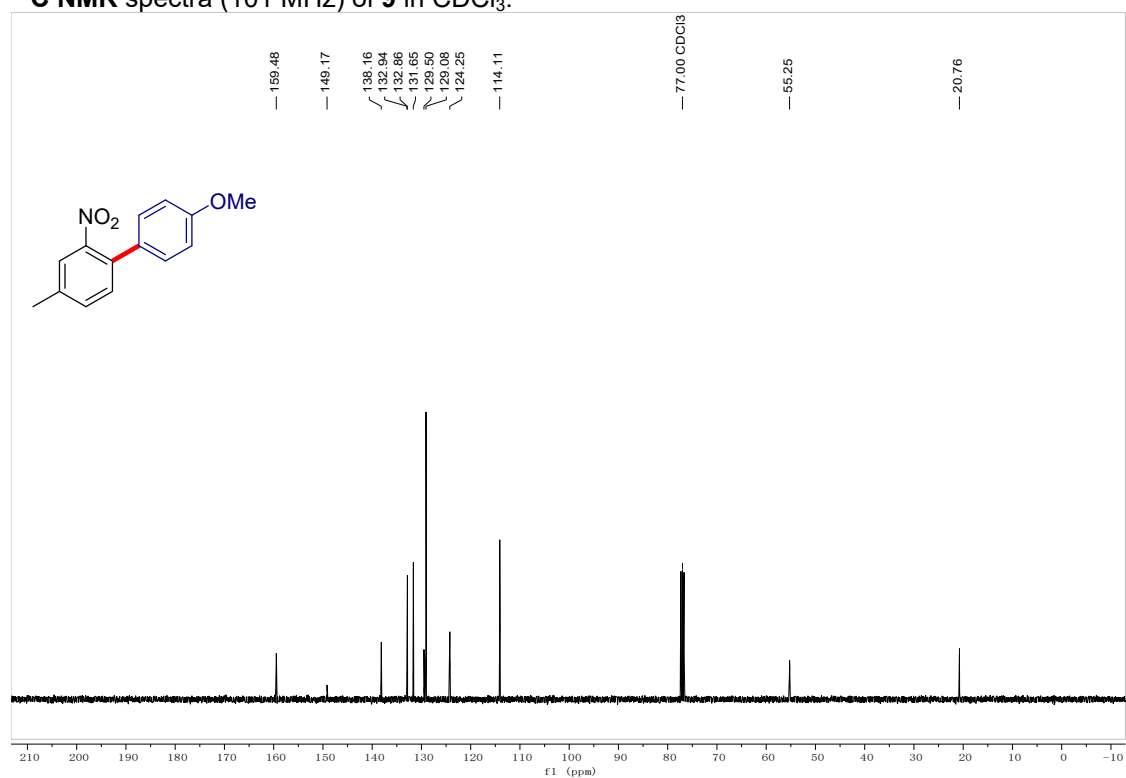

# SUPPORTING INFORMATION

<sup>1</sup>H NMR spectra (400 MHz) of **10** in CDCl<sub>3</sub>.

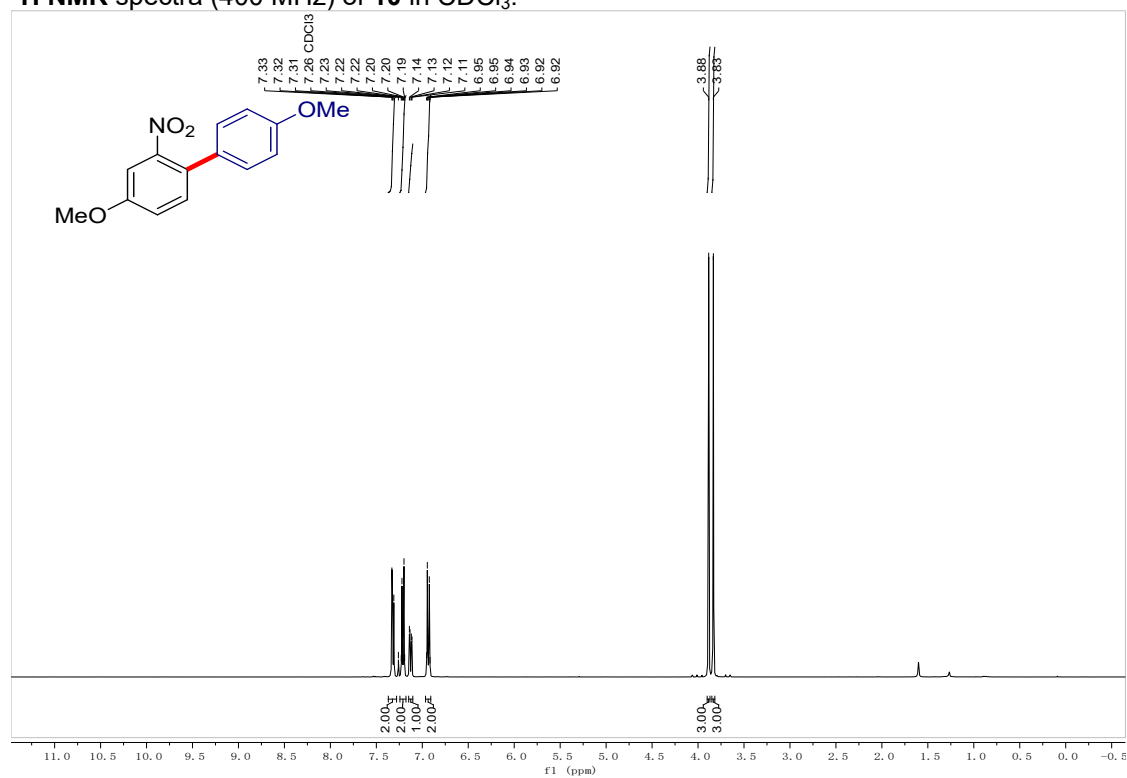

<sup>13</sup>C NMR spectra (101 MHz) of **10** in CDCl<sub>3</sub>.

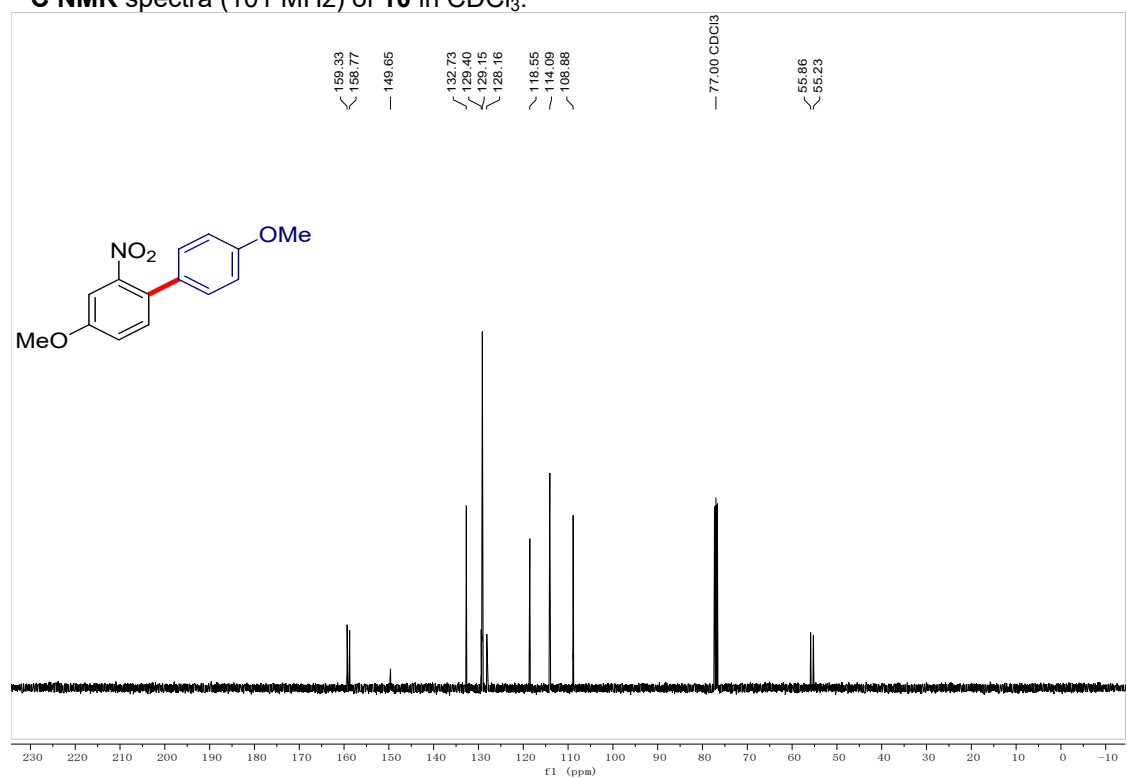

# SUPPORTING INFORMATION

<sup>1</sup>H NMR spectra (400 MHz) of **11** in CDCl<sub>3</sub>.

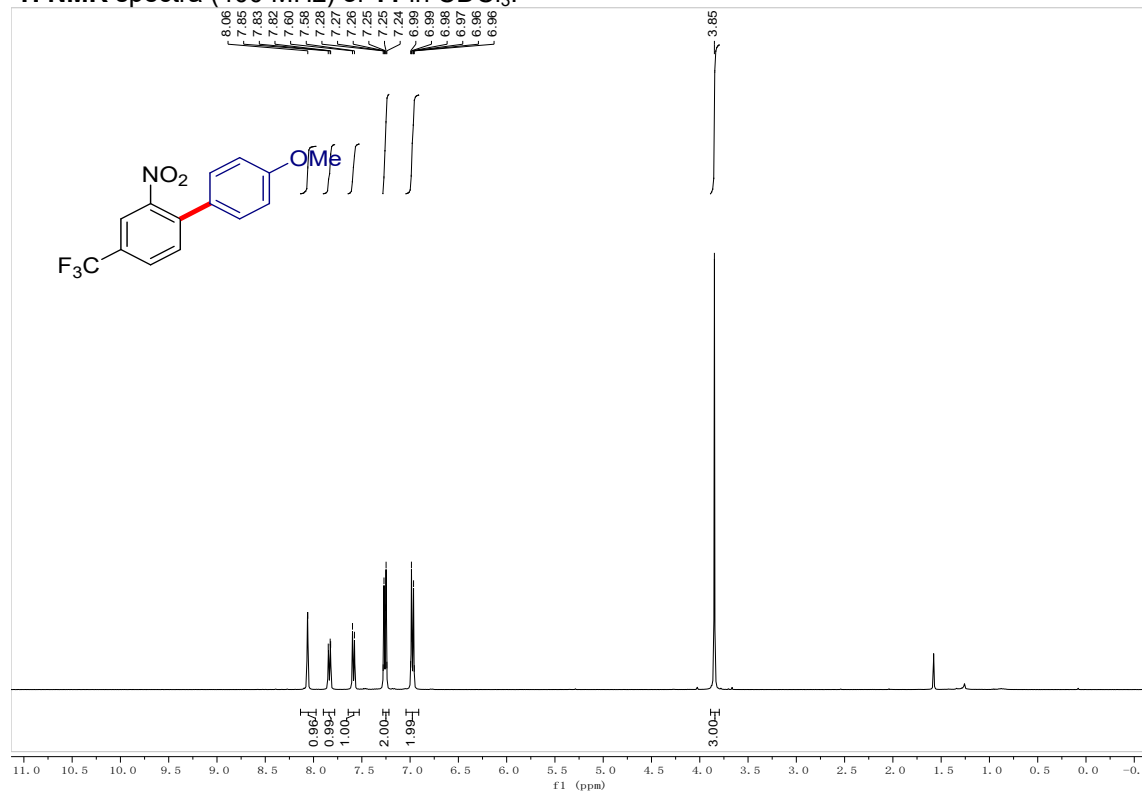

<sup>13</sup>C NMR spectra (101 MHz) of **11** in CDCl<sub>3</sub>.

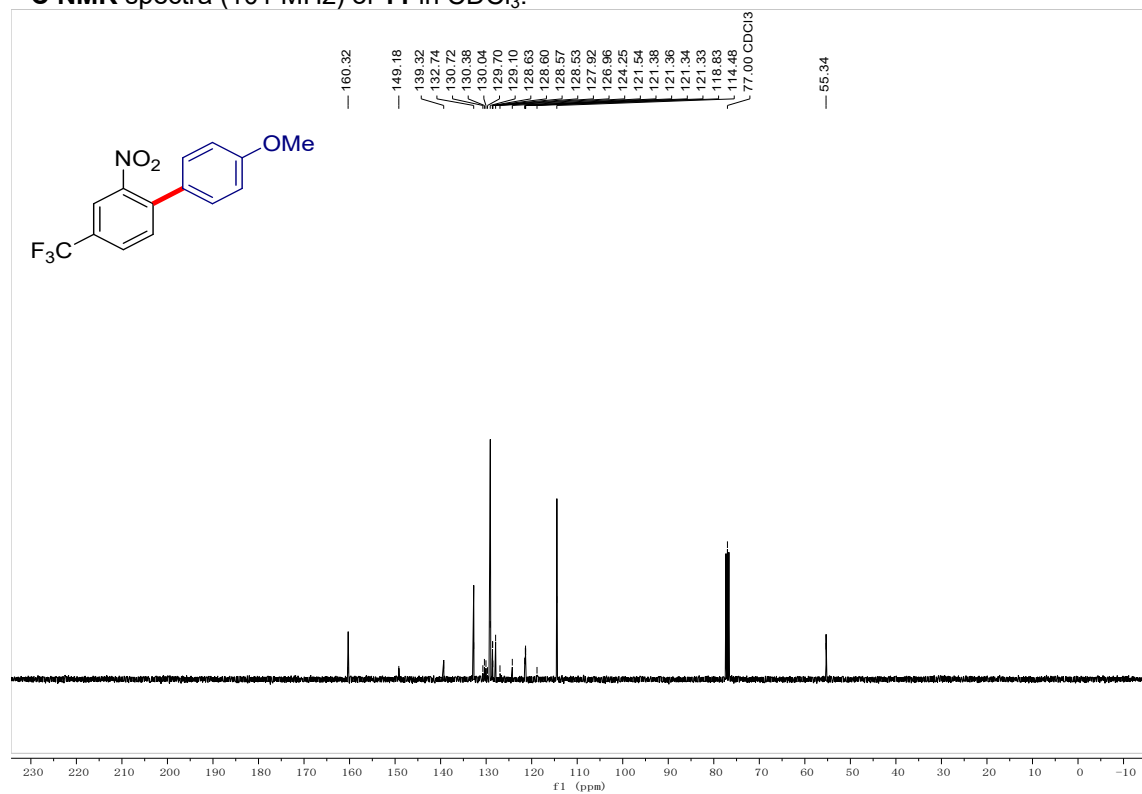

## SUPPORTING INFORMATION

$^{19}\text{F}$  NMR spectra (377 MHz) of **11** in  $\text{CDCl}_3$ .

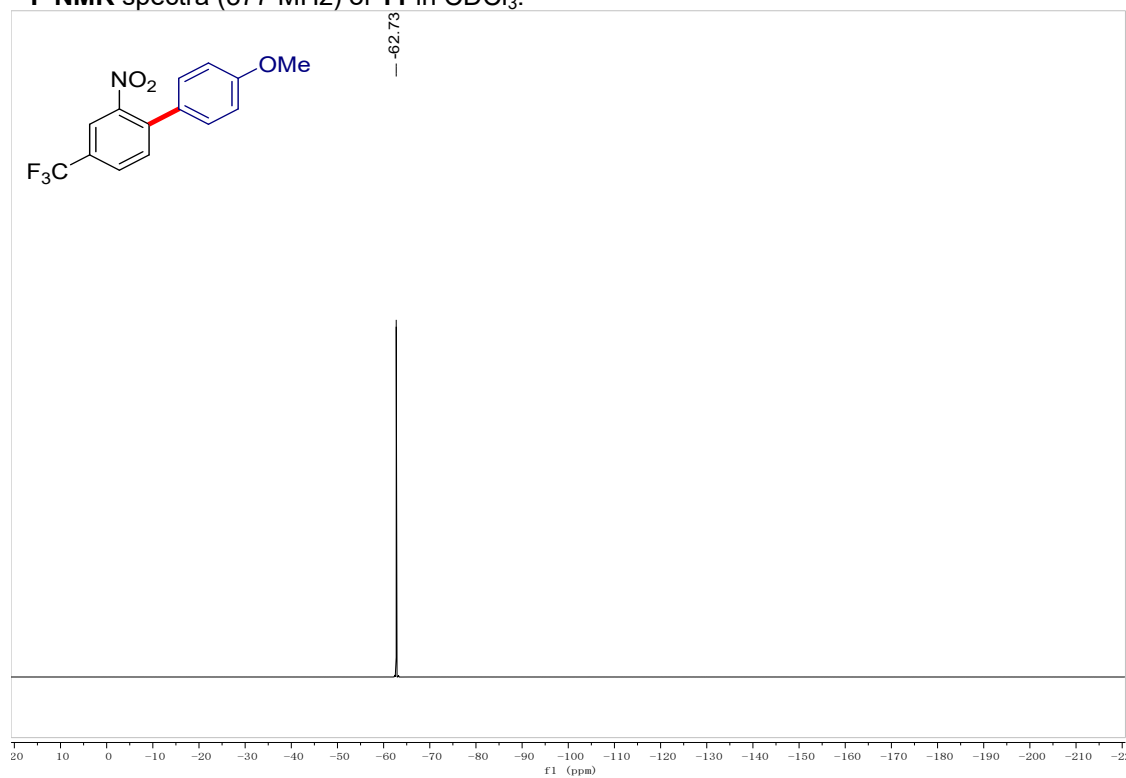

# SUPPORTING INFORMATION

<sup>1</sup>H NMR spectra (400 MHz) of **12** in CDCl<sub>3</sub>.

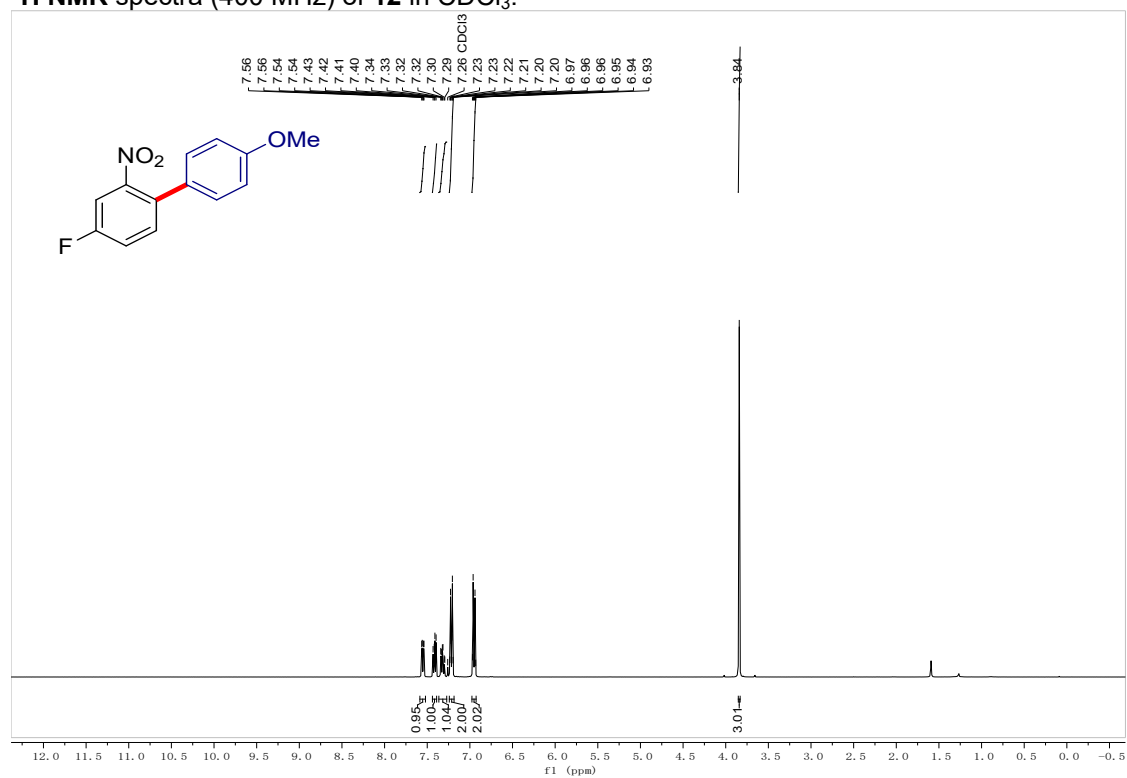

<sup>13</sup>C NMR spectra (101 MHz) of **12** in CDCl<sub>3</sub>.

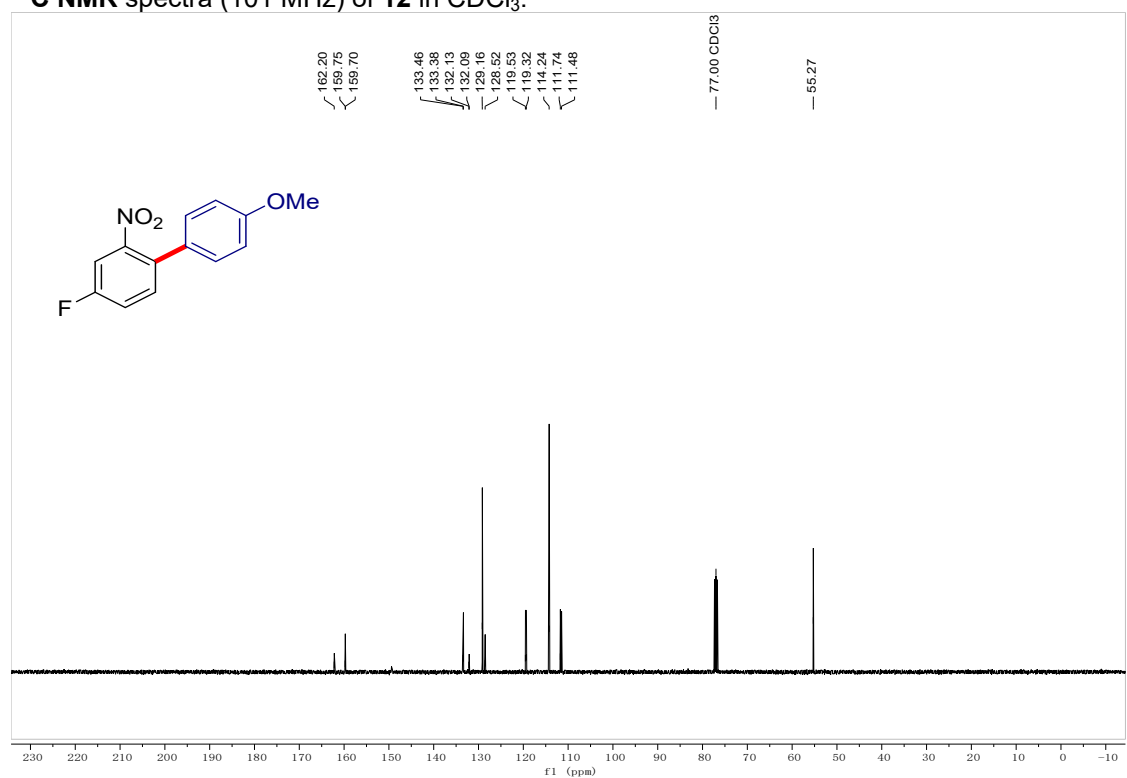

## SUPPORTING INFORMATION

$^{19}\text{F}$  NMR spectra (377 MHz) of **12** in  $\text{CDCl}_3$ .

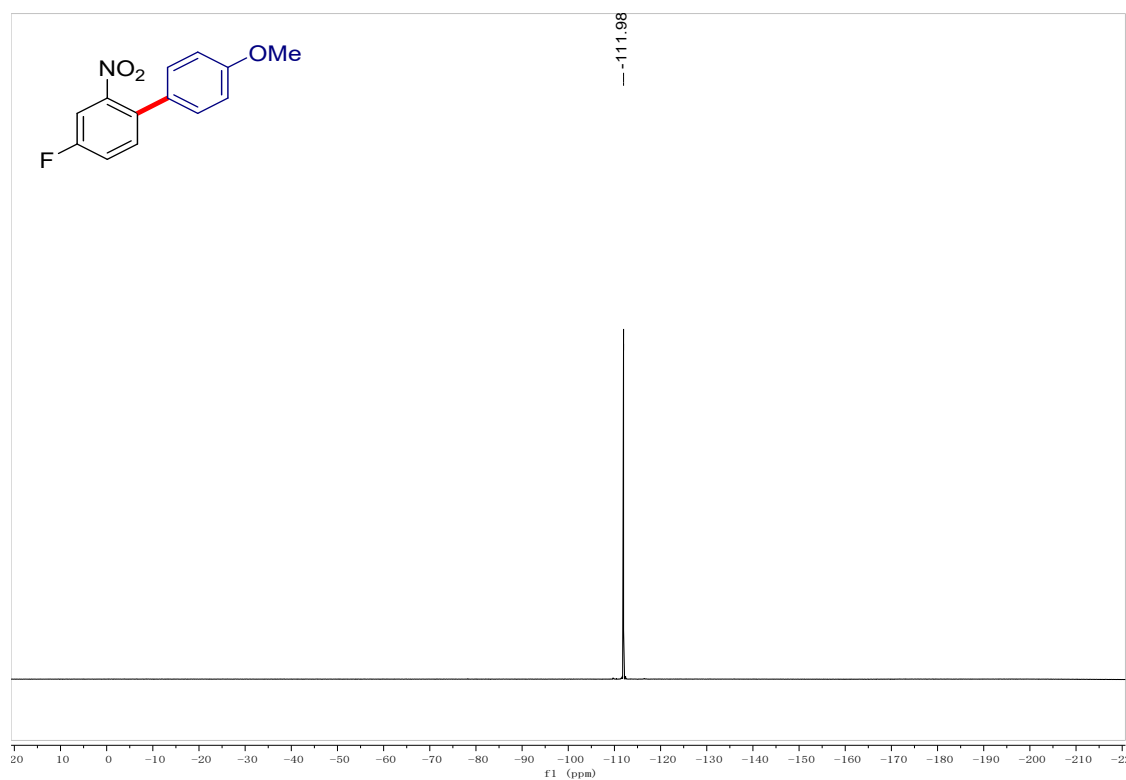

# SUPPORTING INFORMATION

$^1\text{H}$  NMR spectra (400 MHz) of **13** in  $\text{CDCl}_3$ .

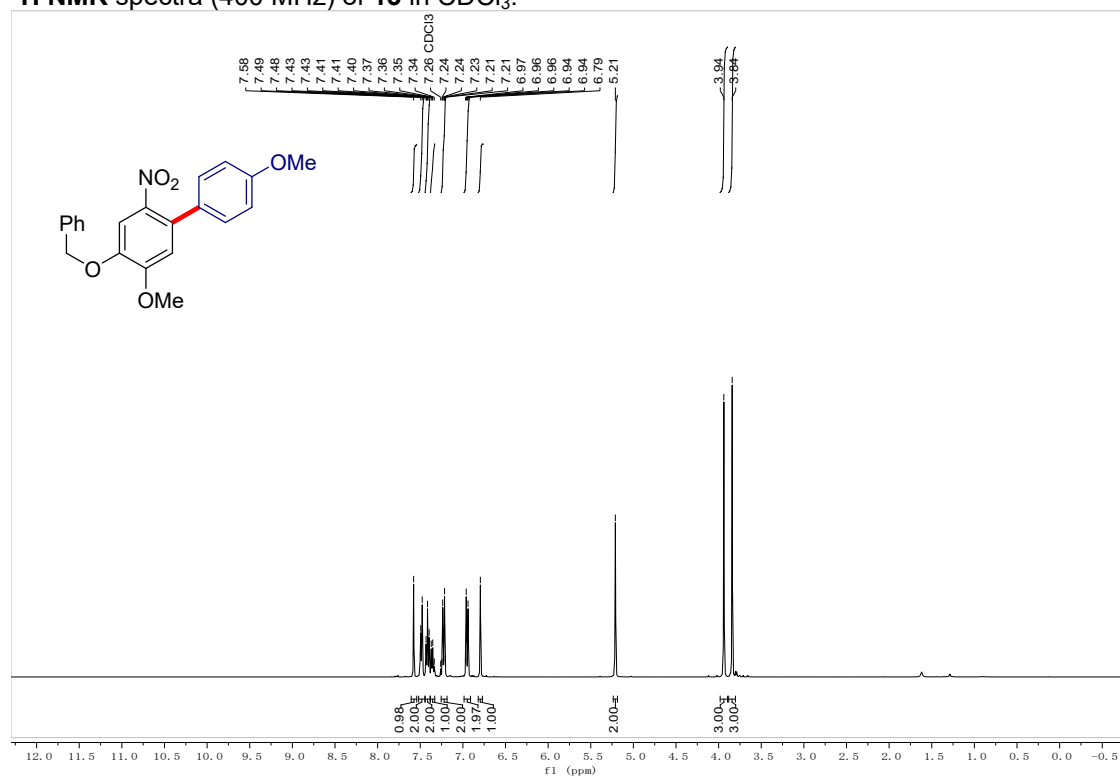

$^{13}\text{C}$  NMR spectra (101 MHz) of **13** in  $\text{CDCl}_3$ .

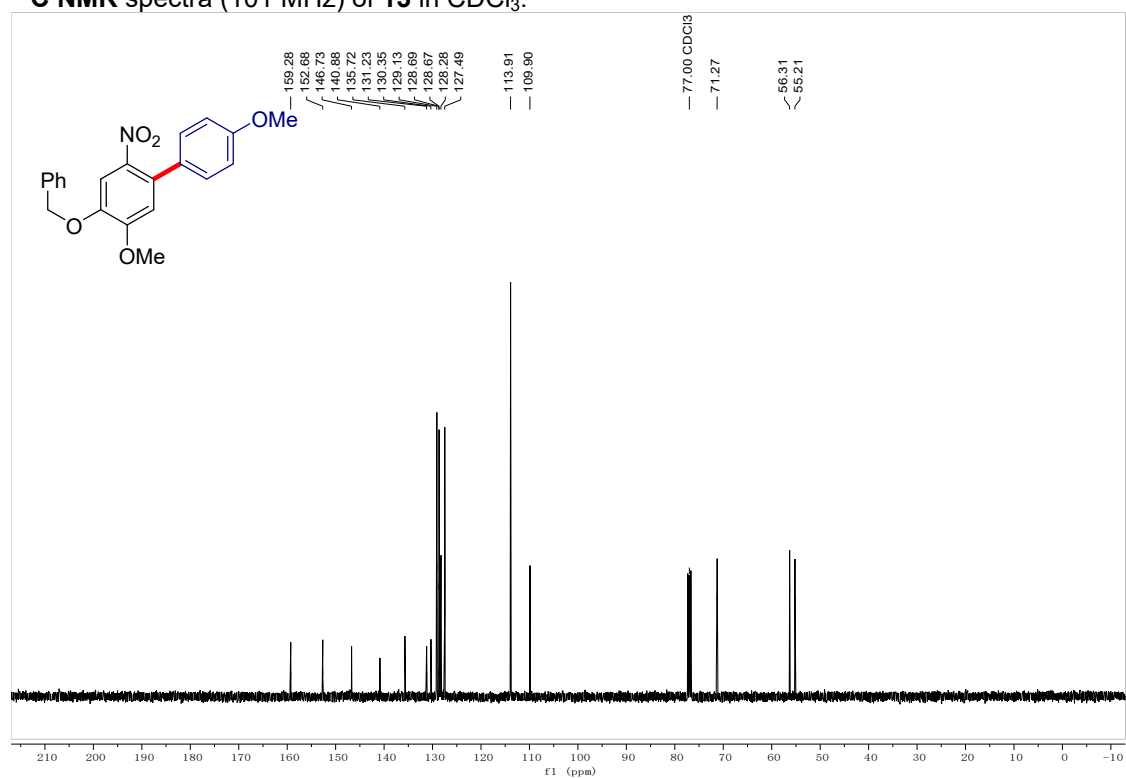

# SUPPORTING INFORMATION

<sup>1</sup>H NMR spectra (400 MHz) of **14** in CDCl<sub>3</sub>.

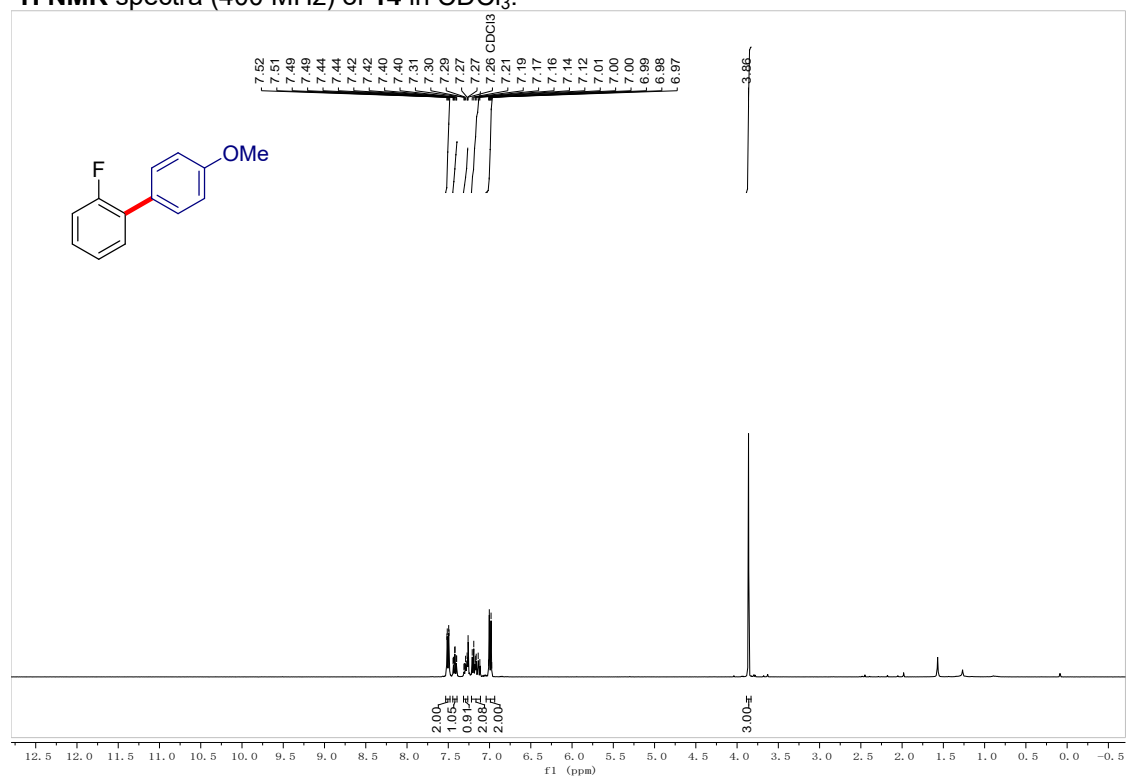

<sup>13</sup>C NMR spectra (101 MHz) of **14** in CDCl<sub>3</sub>.

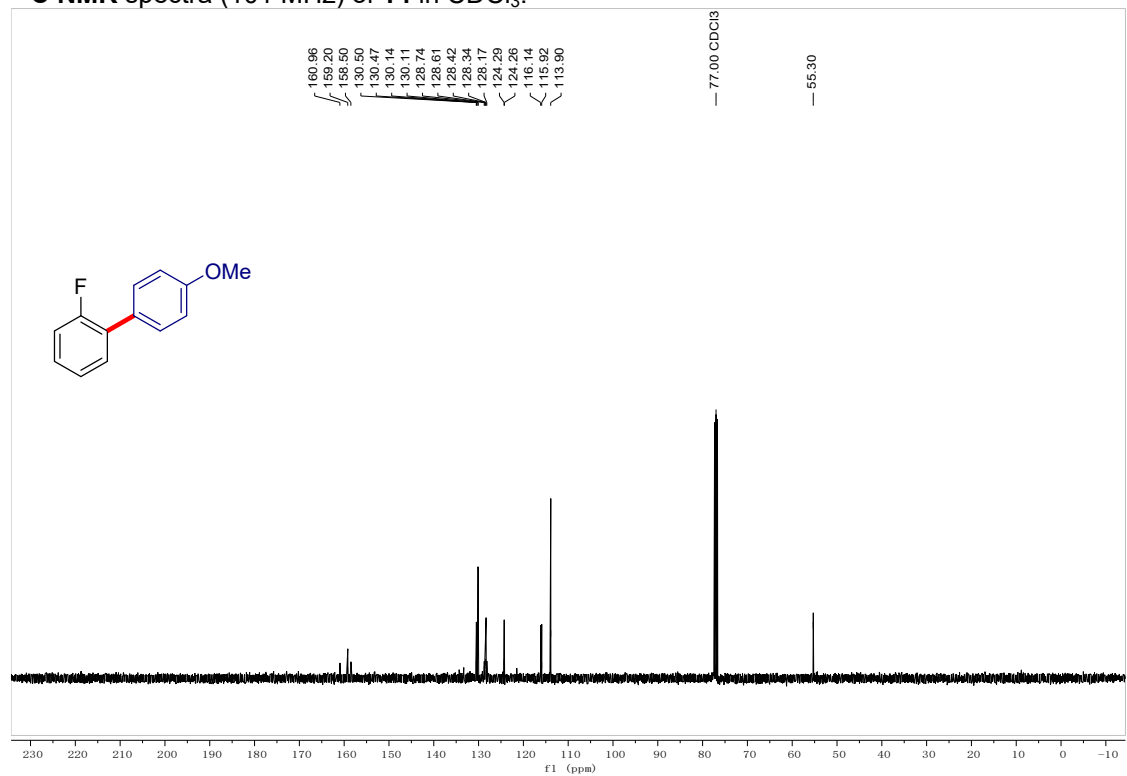

## SUPPORTING INFORMATION

$^{19}\text{F}$  NMR spectra (101 MHz) of **14** in  $\text{CDCl}_3$ .

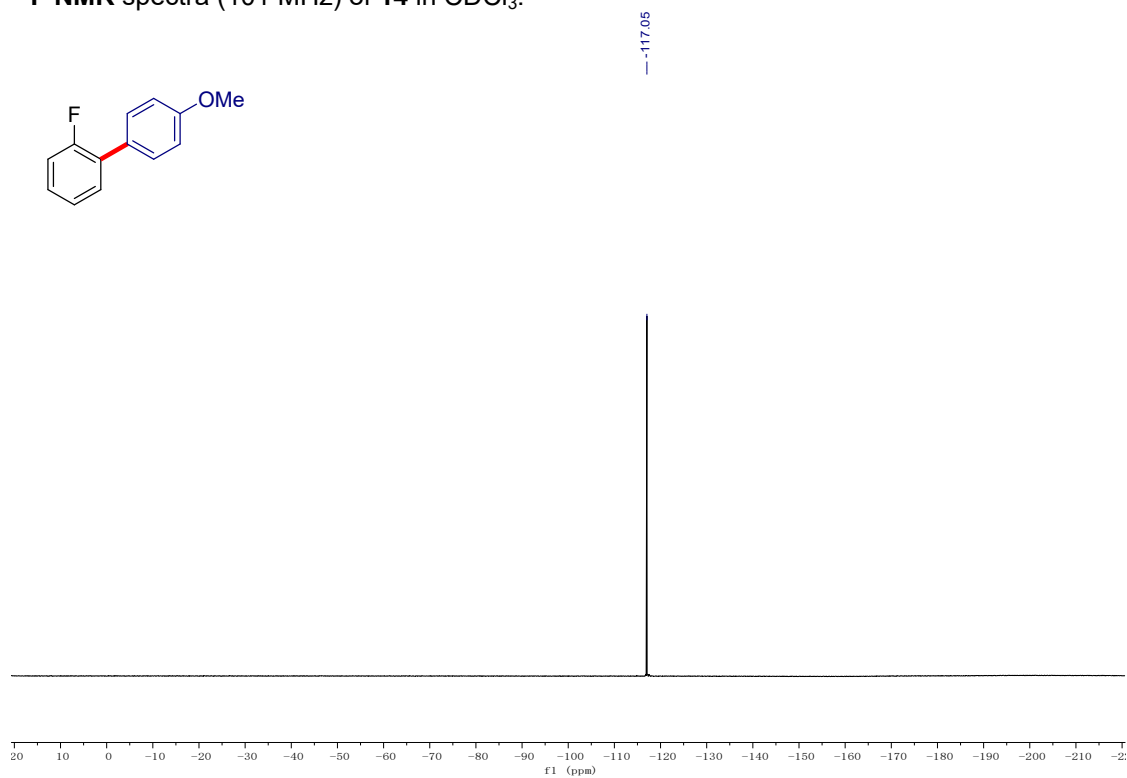

# SUPPORTING INFORMATION

<sup>1</sup>H NMR spectra (400 MHz) of **15** in CDCl<sub>3</sub>.

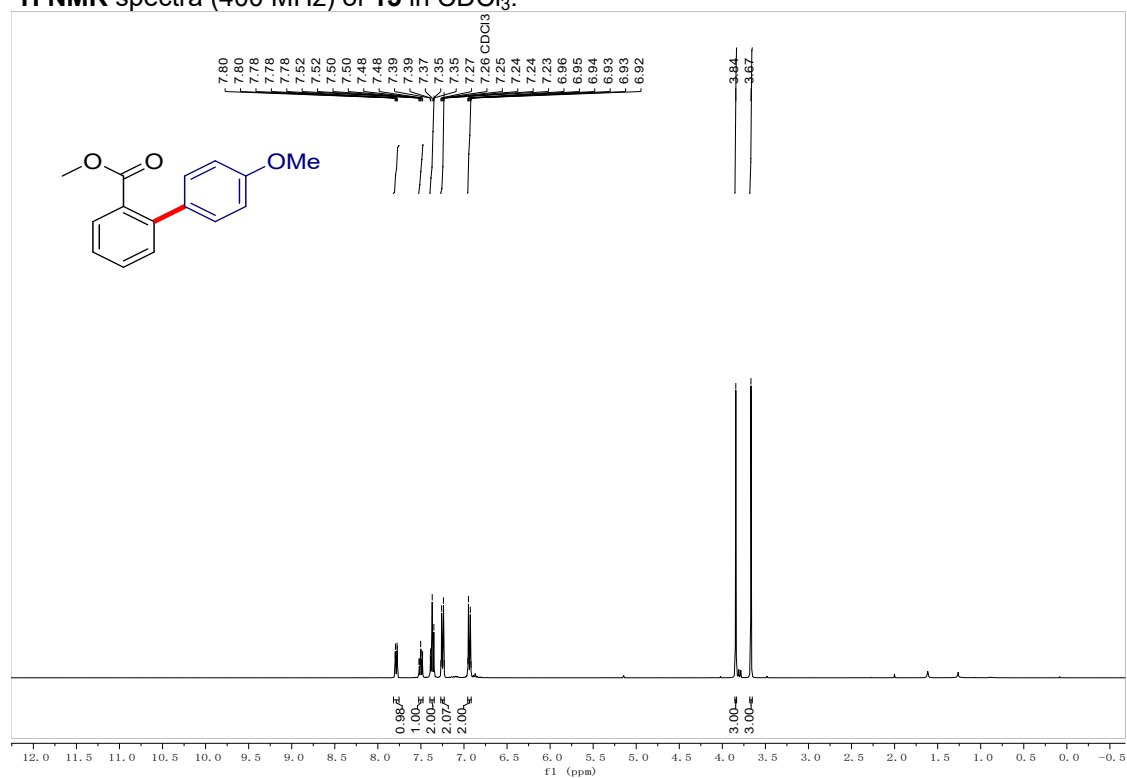

<sup>13</sup>C NMR spectra (101 MHz) of **15** in CDCl<sub>3</sub>.

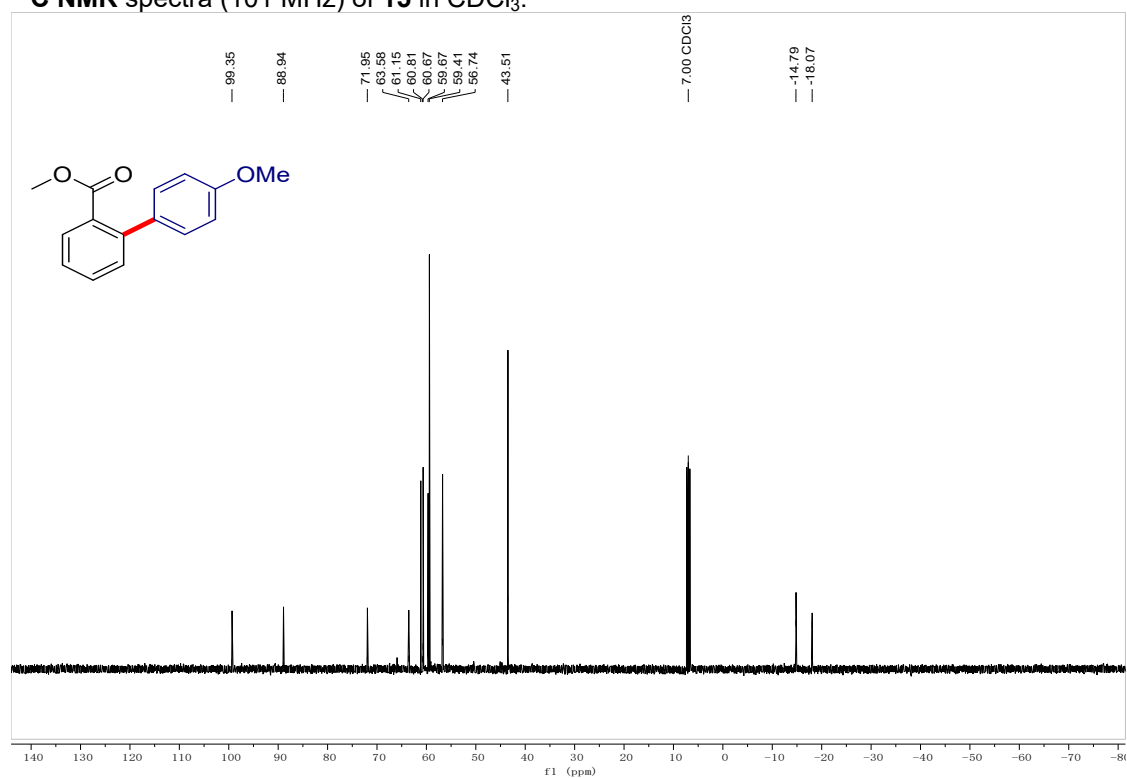

# SUPPORTING INFORMATION

<sup>1</sup>H NMR spectra (400 MHz) of **16** in CDCl<sub>3</sub>.

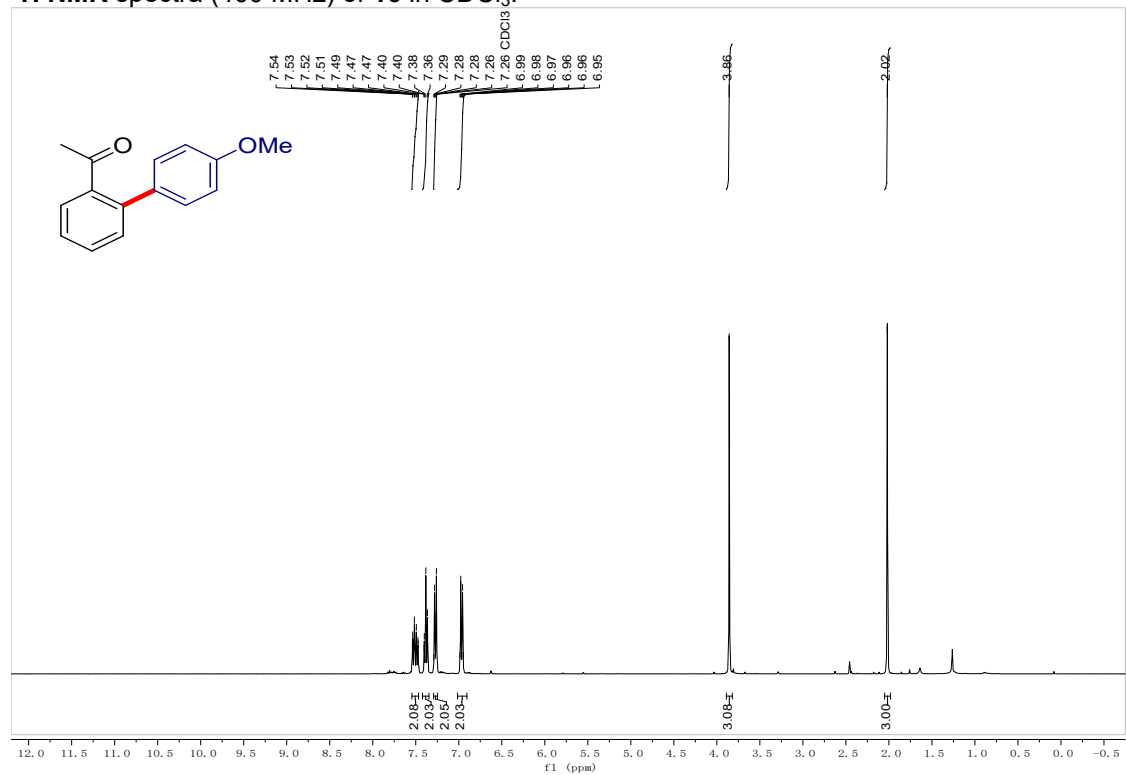

<sup>13</sup>C NMR spectra (101 MHz) of **16** in CDCl<sub>3</sub>.

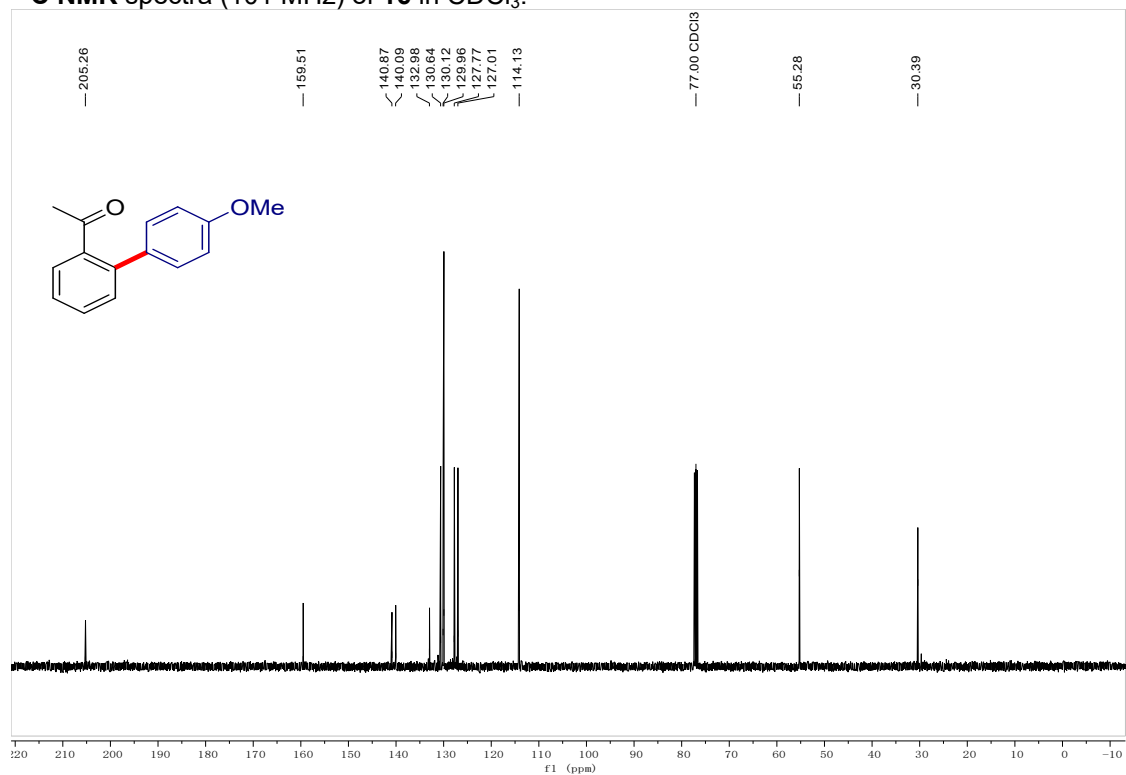

# SUPPORTING INFORMATION

<sup>1</sup>H NMR spectra (400 MHz) of **17** in CDCl<sub>3</sub>.

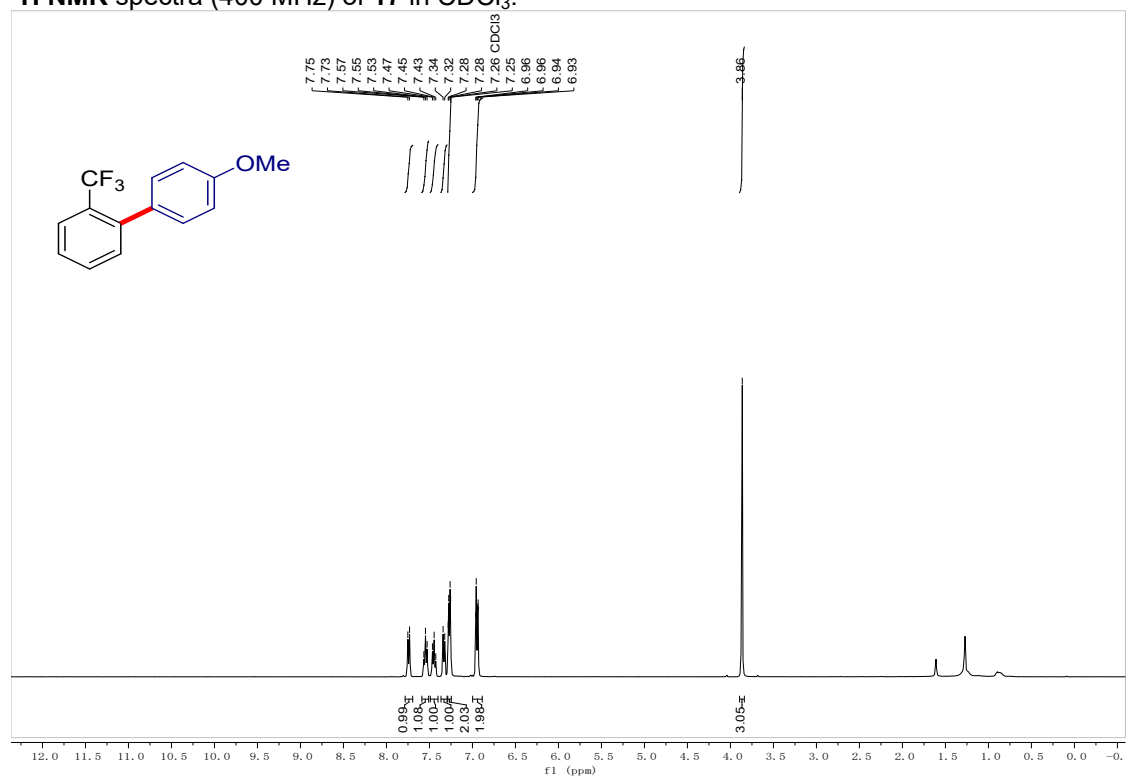

<sup>13</sup>C NMR spectra (101 MHz) of **17** in CDCl<sub>3</sub>.

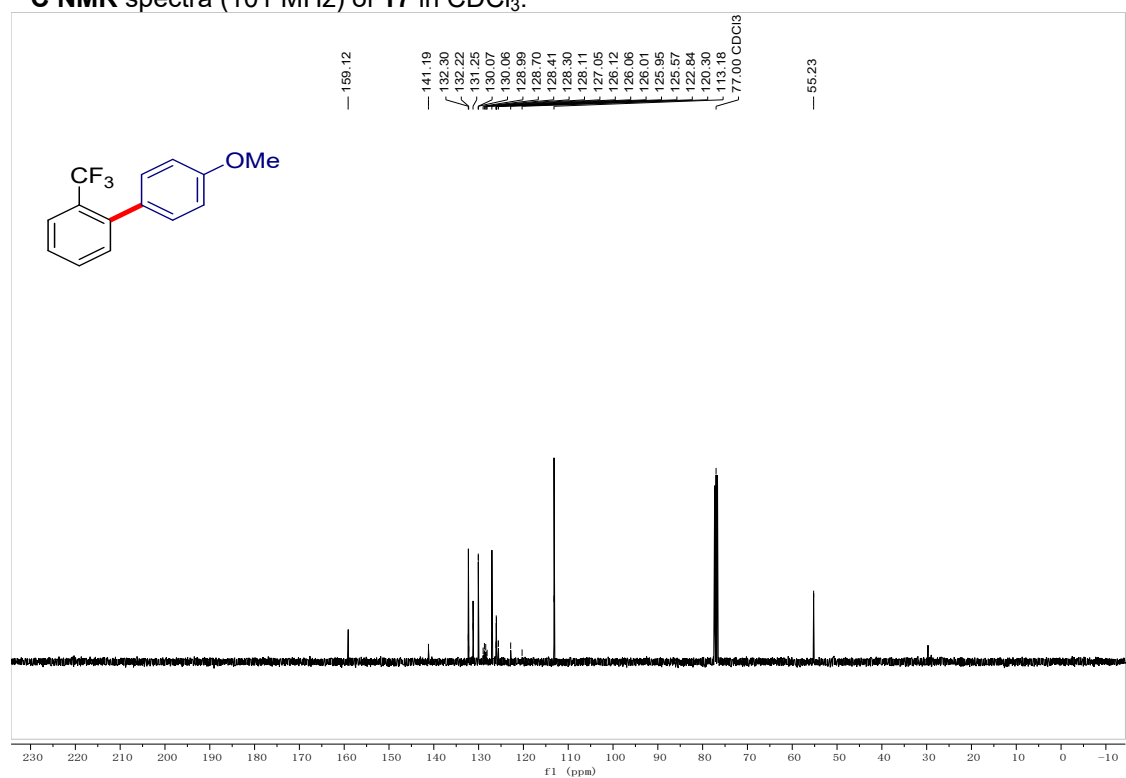

## SUPPORTING INFORMATION

$^{19}\text{F}$  NMR spectra (377 MHz) of **17** in  $\text{CDCl}_3$ .

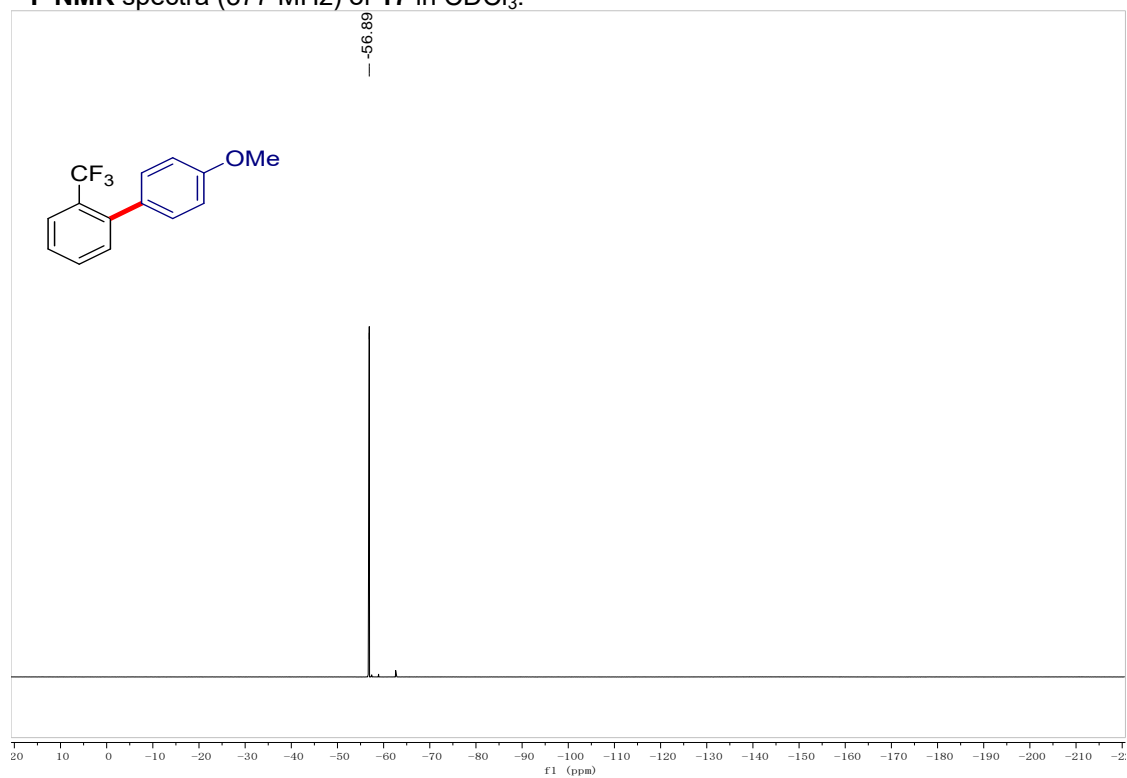

# SUPPORTING INFORMATION

**<sup>1</sup>H NMR spectra (400 MHz) of 18 in CDCl<sub>3</sub>.**

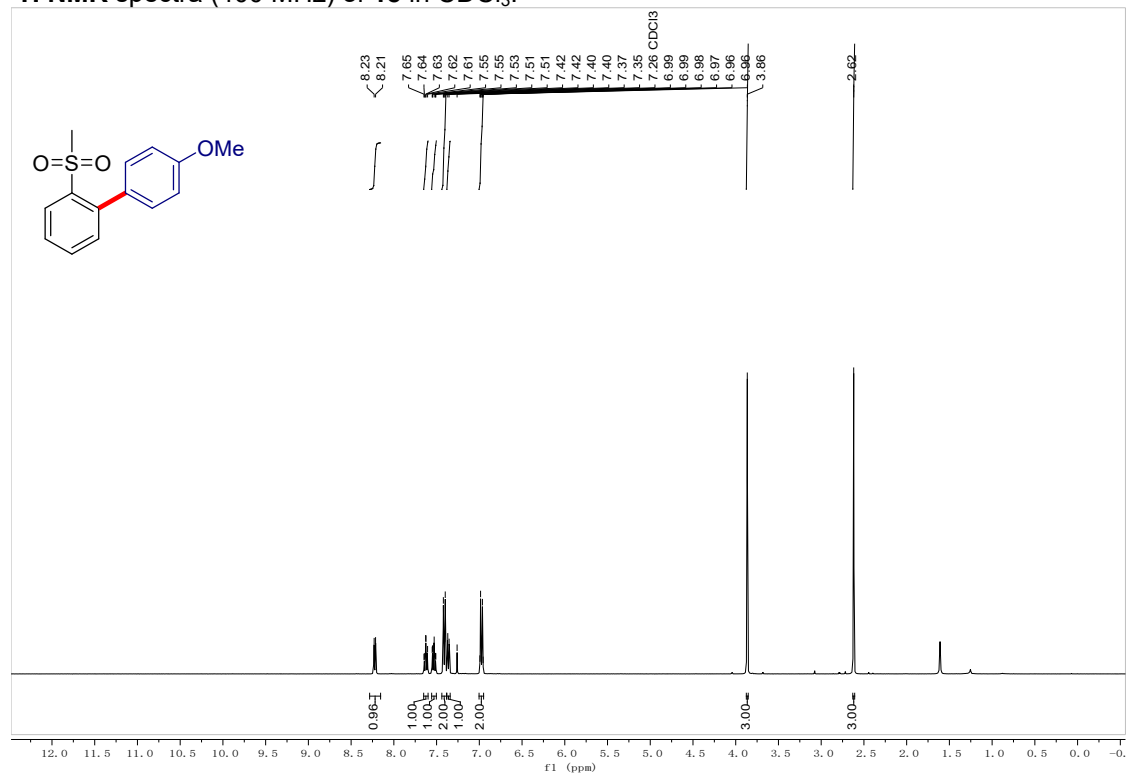

**<sup>13</sup>C NMR spectra (101 MHz) of 18 in CDCl<sub>3</sub>.**

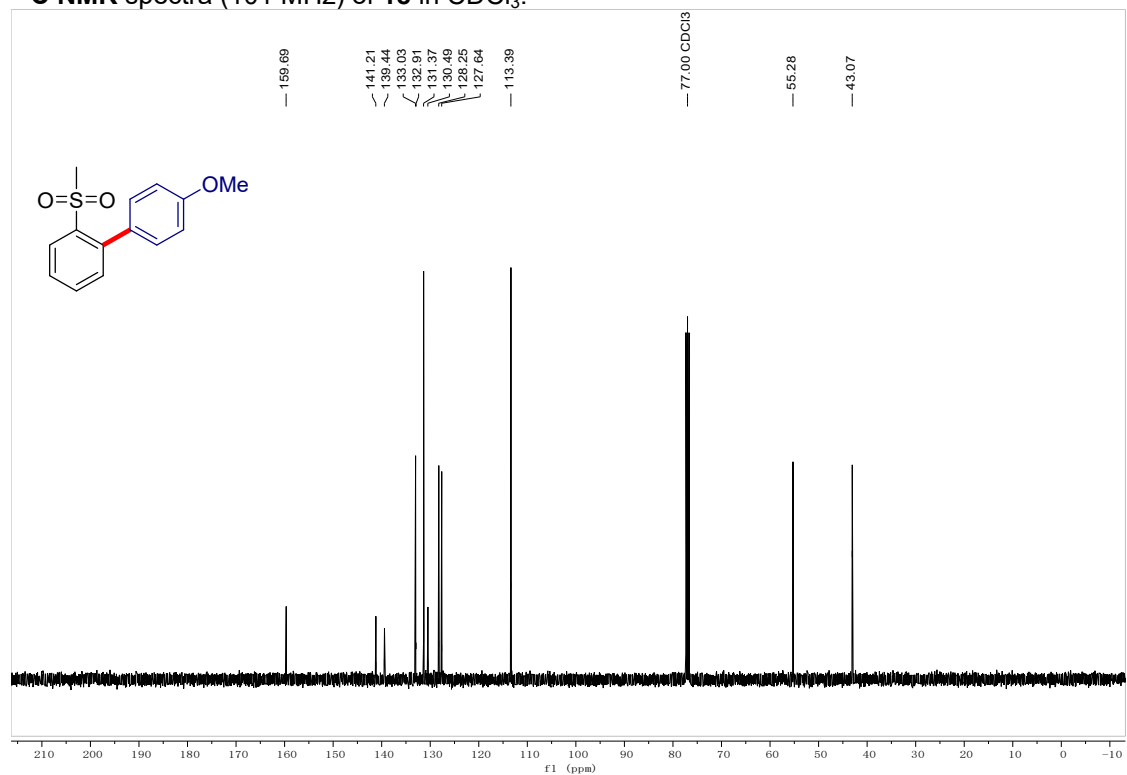

# SUPPORTING INFORMATION

<sup>1</sup>H NMR spectra (400 MHz) of **19** in CDCl<sub>3</sub>.

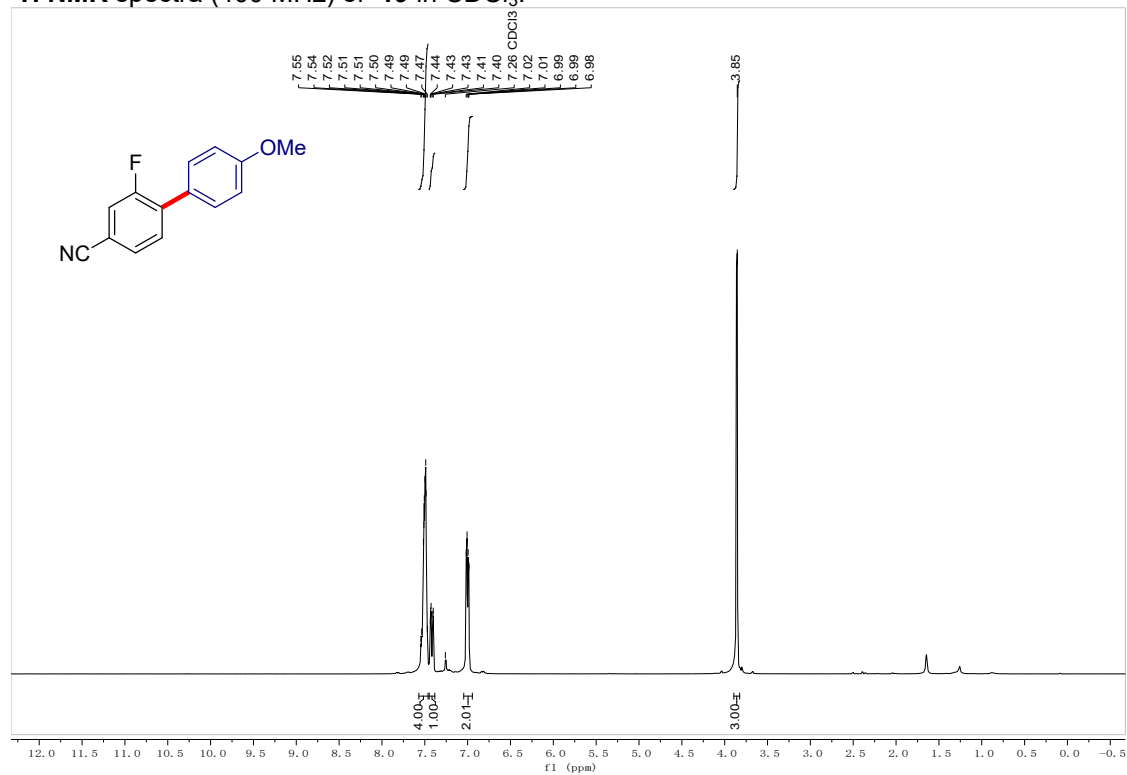

<sup>13</sup>C NMR spectra (101 MHz) of **19** in CDCl<sub>3</sub>.

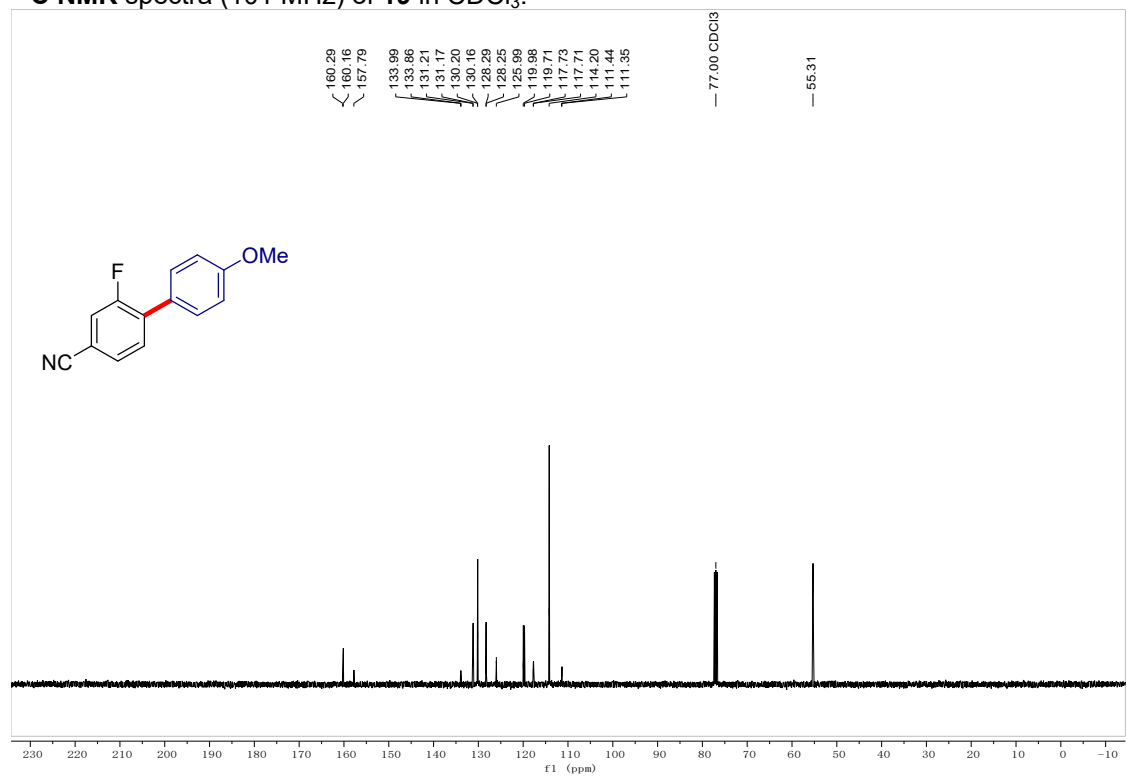

## SUPPORTING INFORMATION

$^{19}\text{F}$  NMR spectra (377 MHz) of **19** in  $\text{CDCl}_3$ .

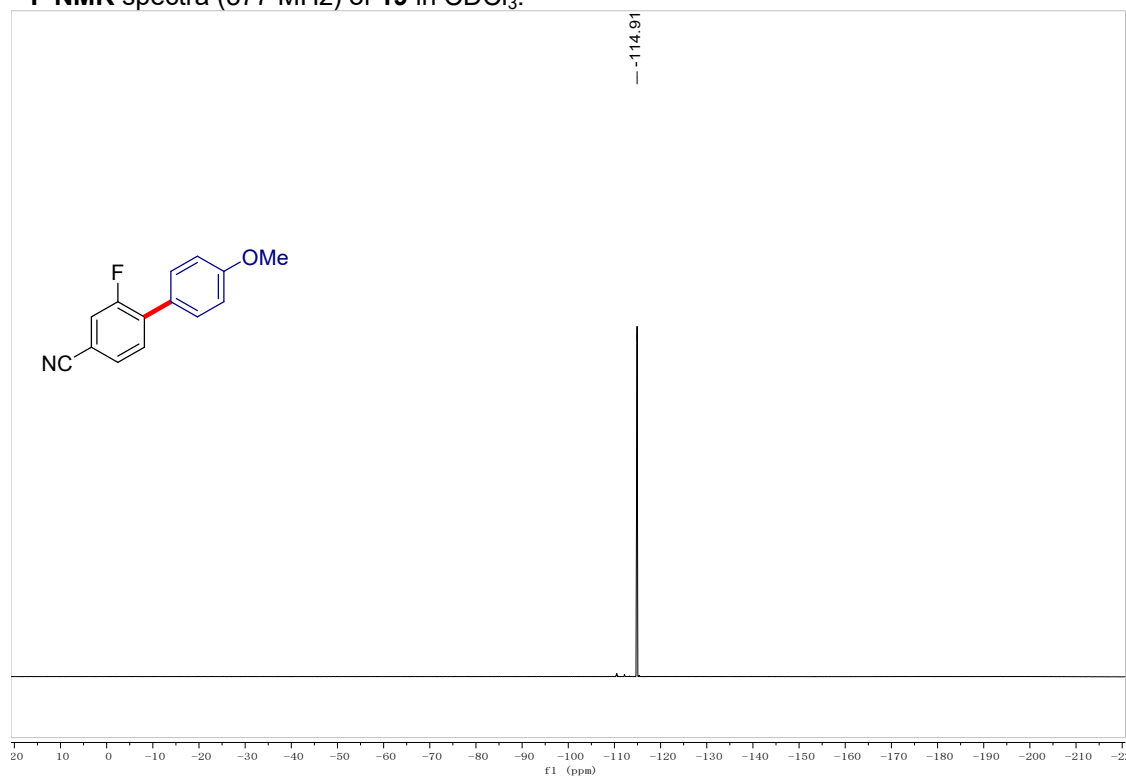

# SUPPORTING INFORMATION

<sup>1</sup>H NMR spectra (400 MHz) of **20** in CDCl<sub>3</sub>.

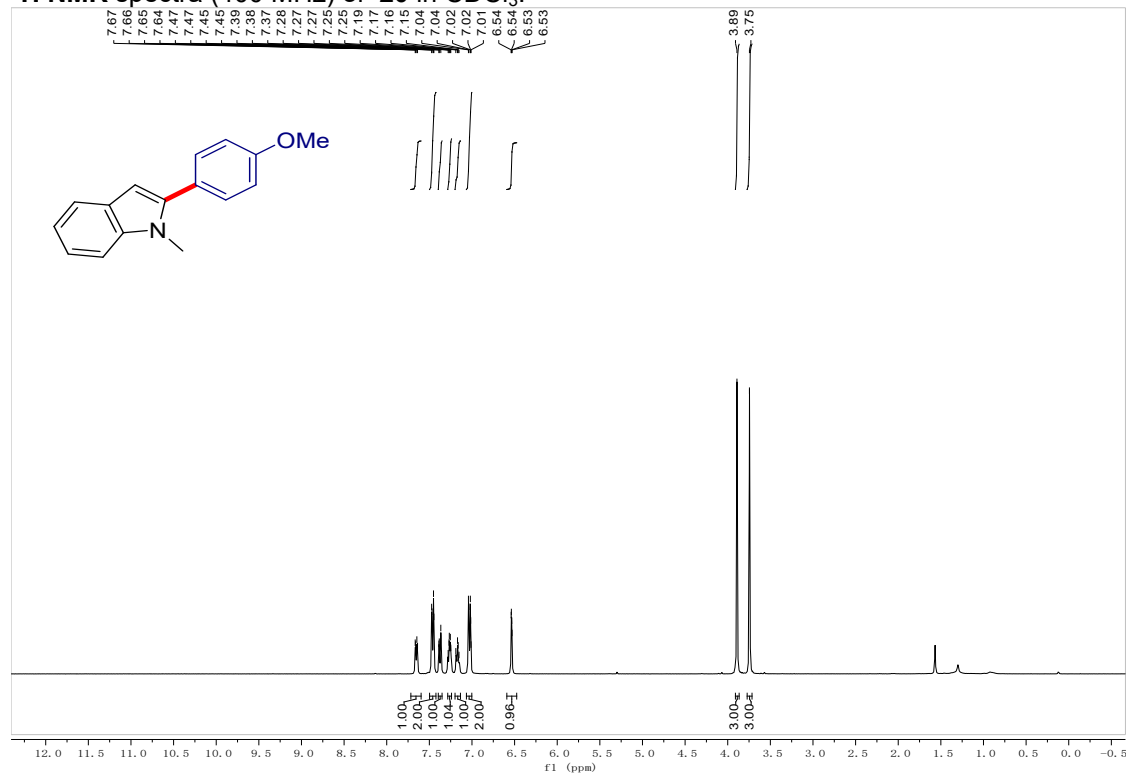

<sup>13</sup>C NMR spectra (101 MHz) of **20** in CDCl<sub>3</sub>.

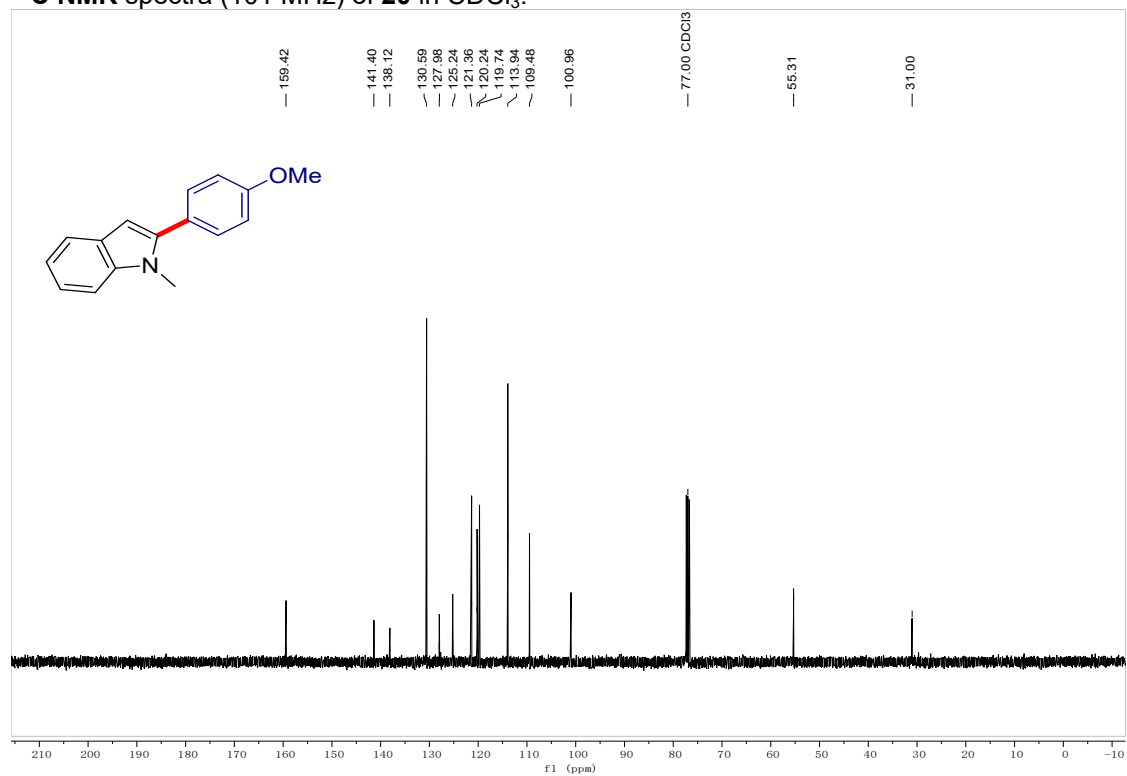

# SUPPORTING INFORMATION

<sup>1</sup>H NMR spectra (400 MHz) of **21** in CDCl<sub>3</sub>.

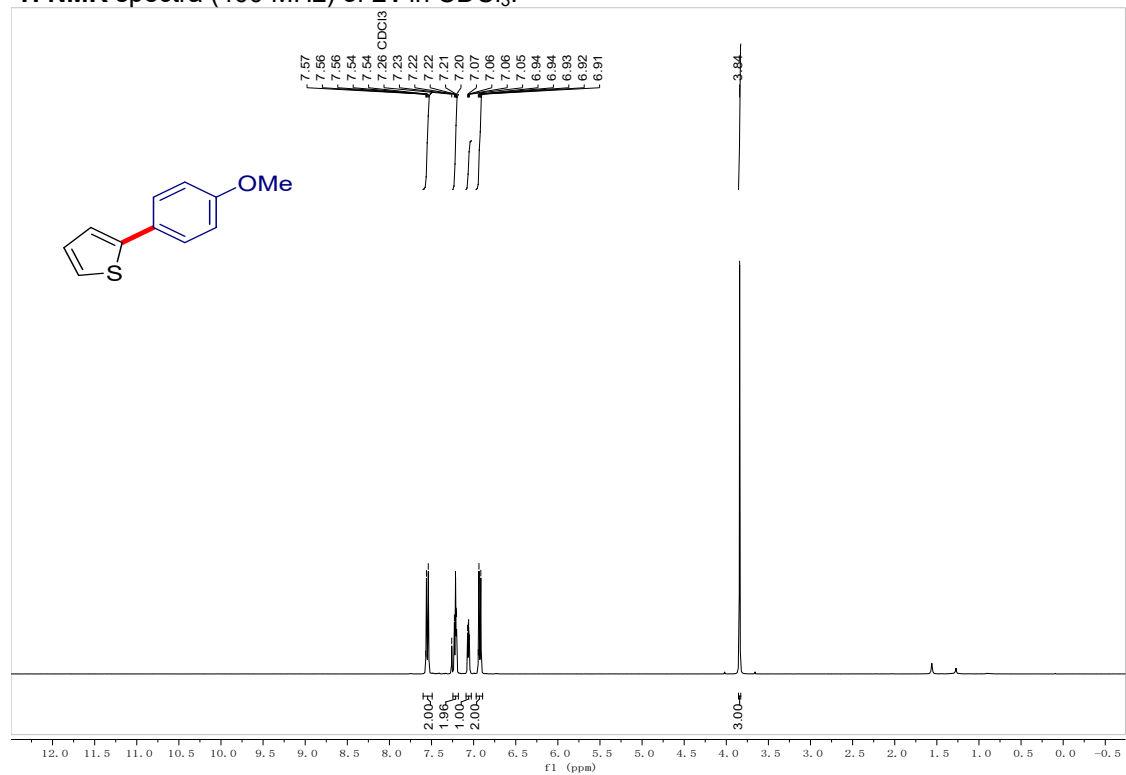

<sup>13</sup>C NMR spectra (101 MHz) of **21** in CDCl<sub>3</sub>.

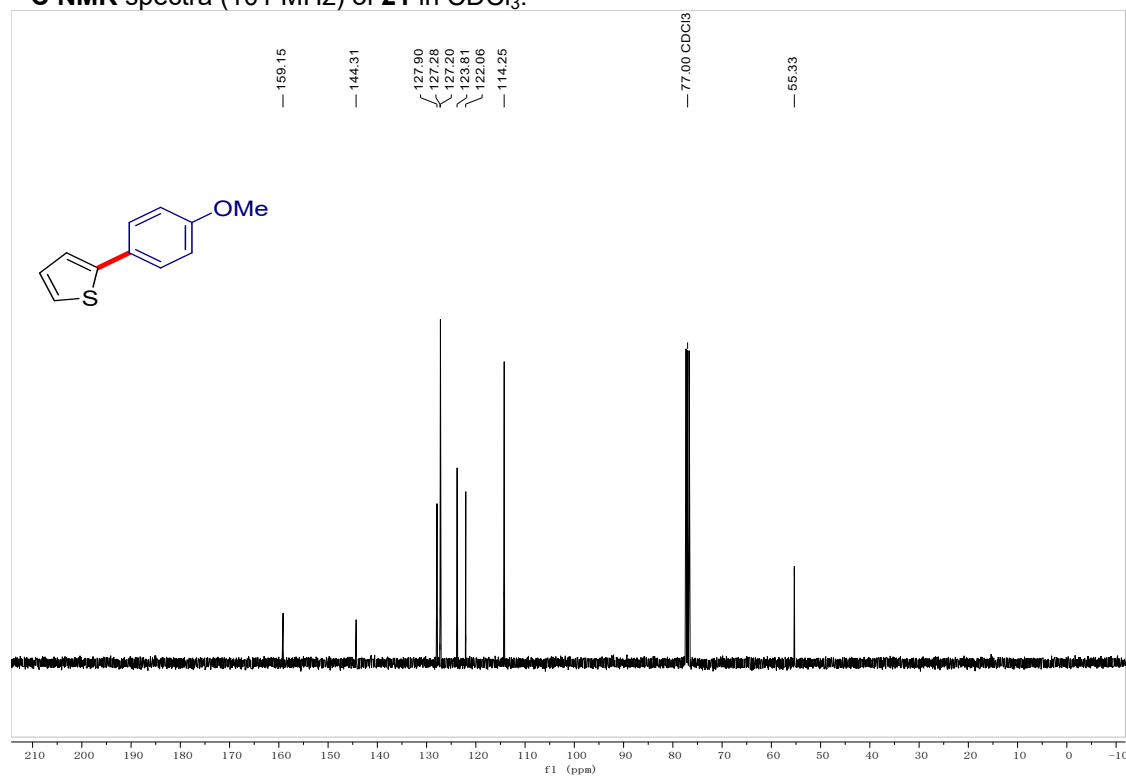

# SUPPORTING INFORMATION

$^1\text{H}$  NMR spectra (400 MHz) of **22** in  $\text{CDCl}_3$ .

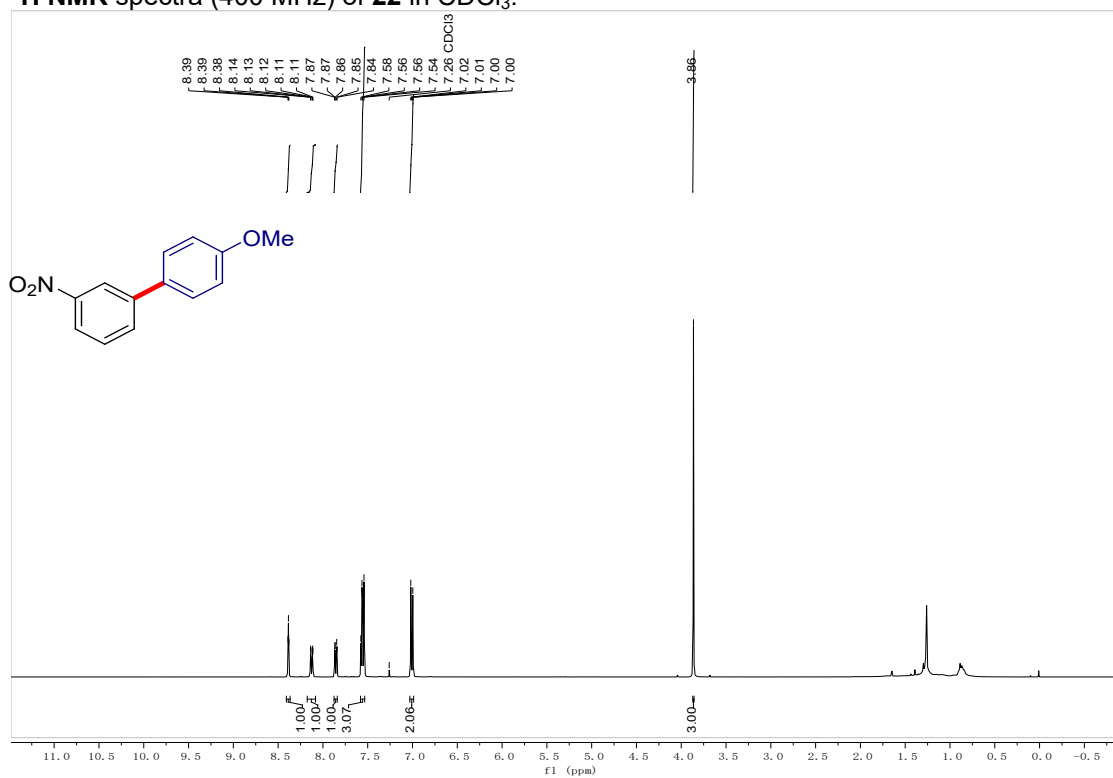

# SUPPORTING INFORMATION

<sup>1</sup>H NMR spectra (400 MHz) of **23** in CDCl<sub>3</sub>.

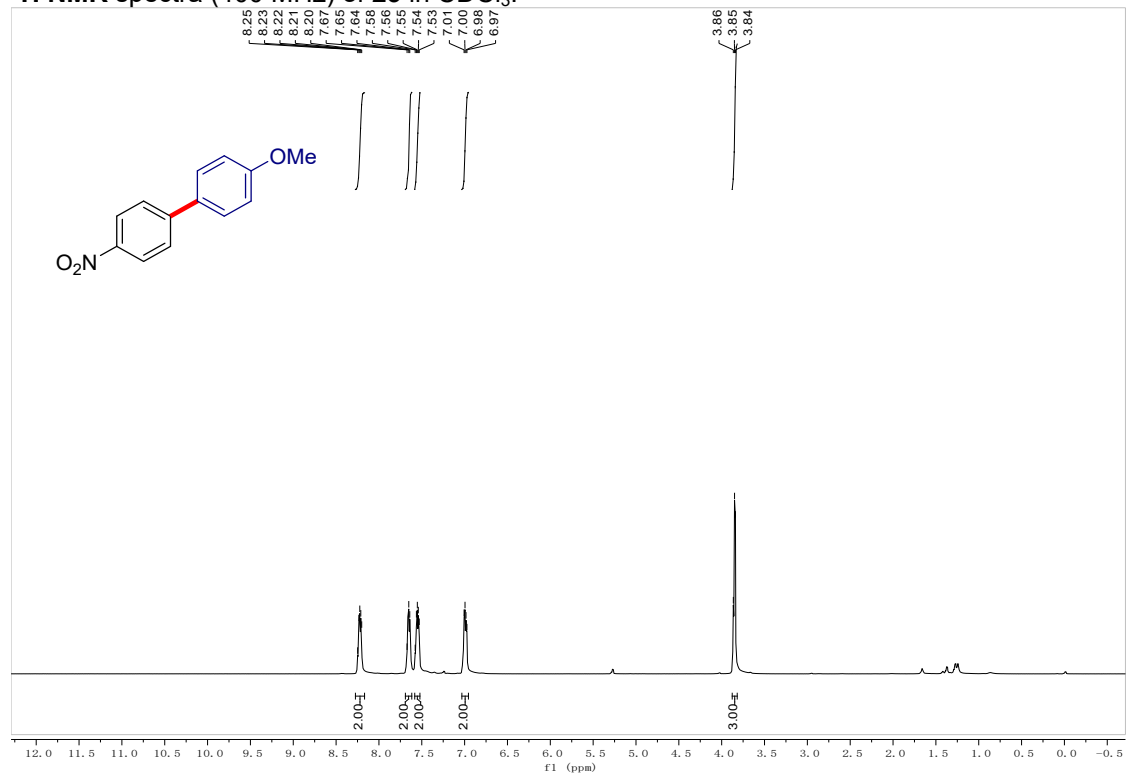

<sup>13</sup>C NMR spectra (101 MHz) of **23** in CDCl<sub>3</sub>.

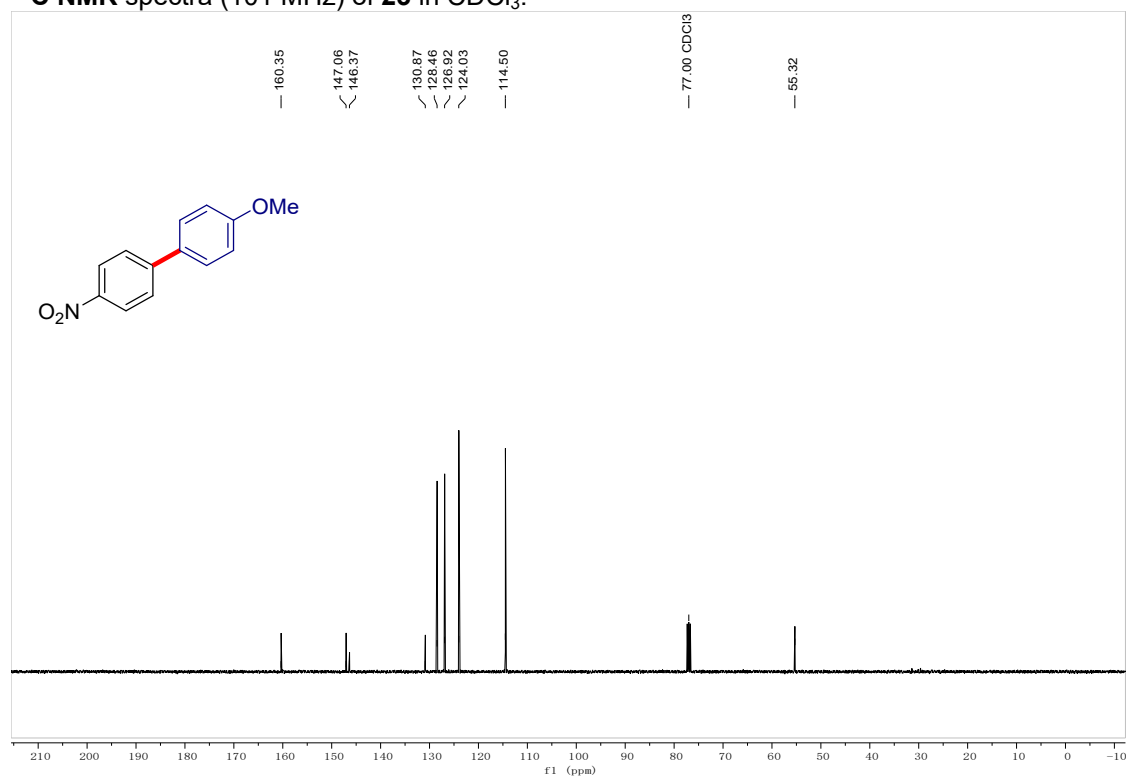

# SUPPORTING INFORMATION

$^1\text{H}$  NMR spectra (400 MHz) of **24** in  $\text{CDCl}_3$ .

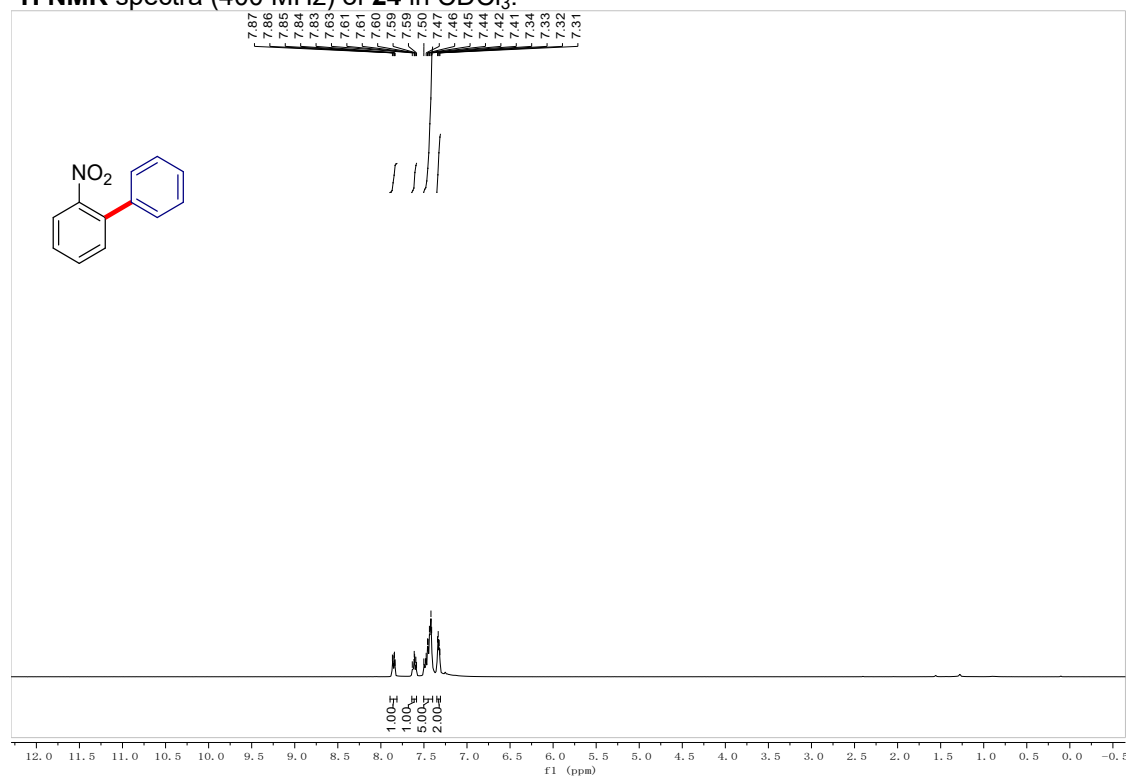

$^{13}\text{C}$  NMR spectra (101 MHz) of **24** in  $\text{CDCl}_3$ .

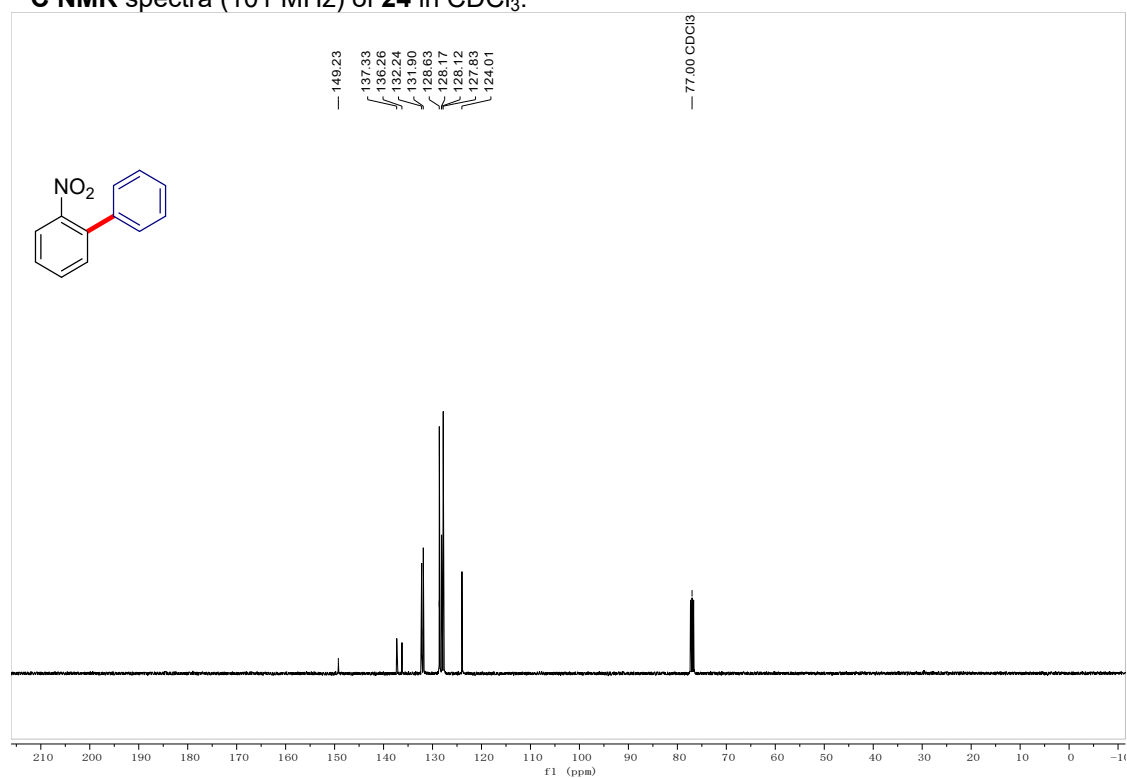

# SUPPORTING INFORMATION

$^1\text{H}$  NMR spectra (400 MHz) of **25** in  $\text{CDCl}_3$ .

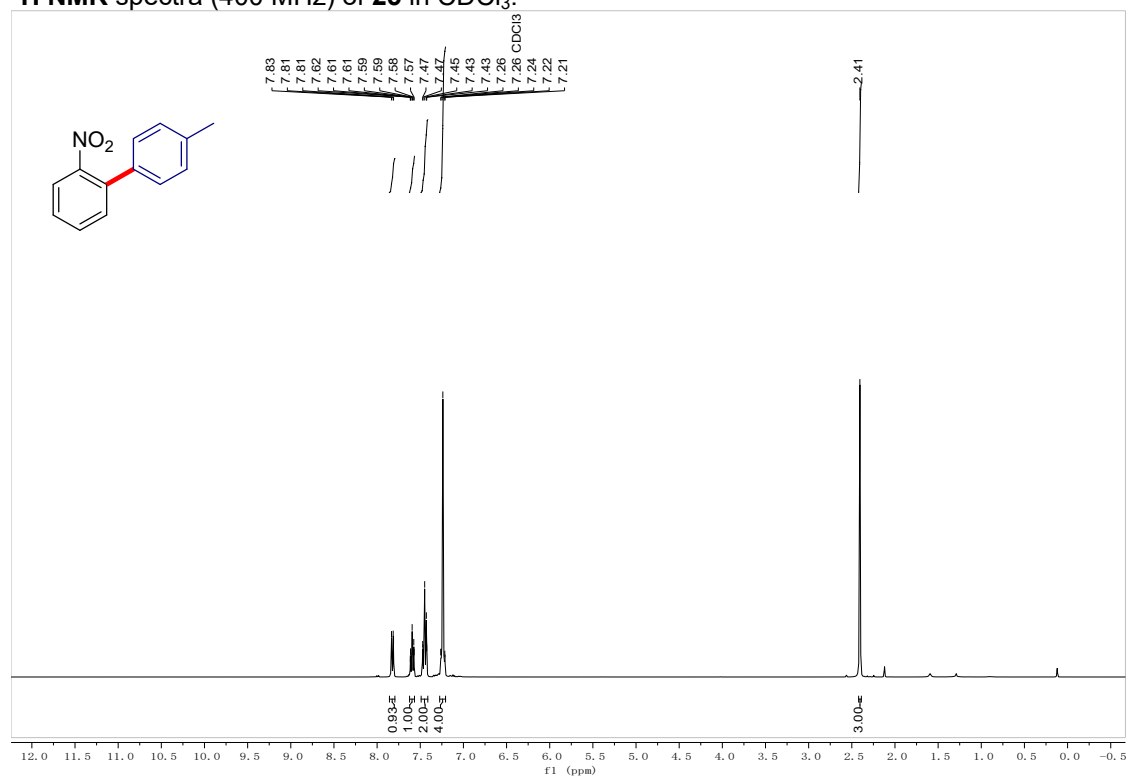

$^{13}\text{C}$  NMR spectra (101 MHz) of **25** in  $\text{CDCl}_3$ .

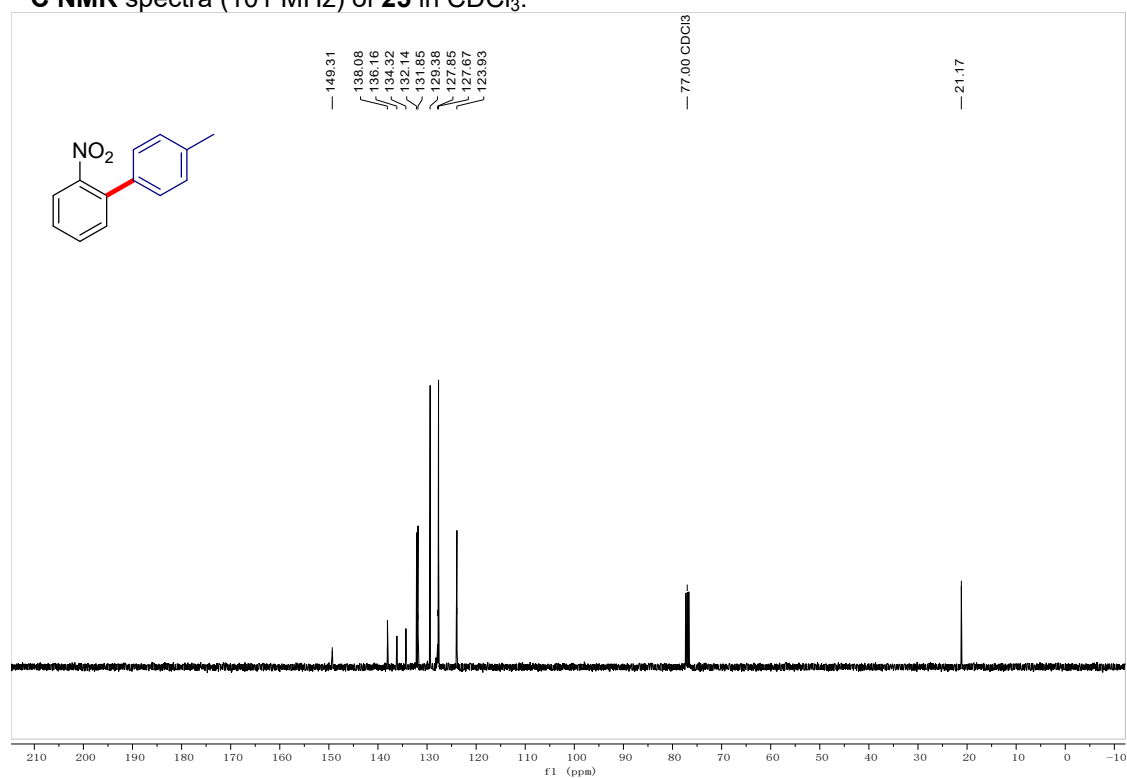

# SUPPORTING INFORMATION

$^1\text{H}$  NMR spectra (400 MHz) of **26** in  $\text{CDCl}_3$ .

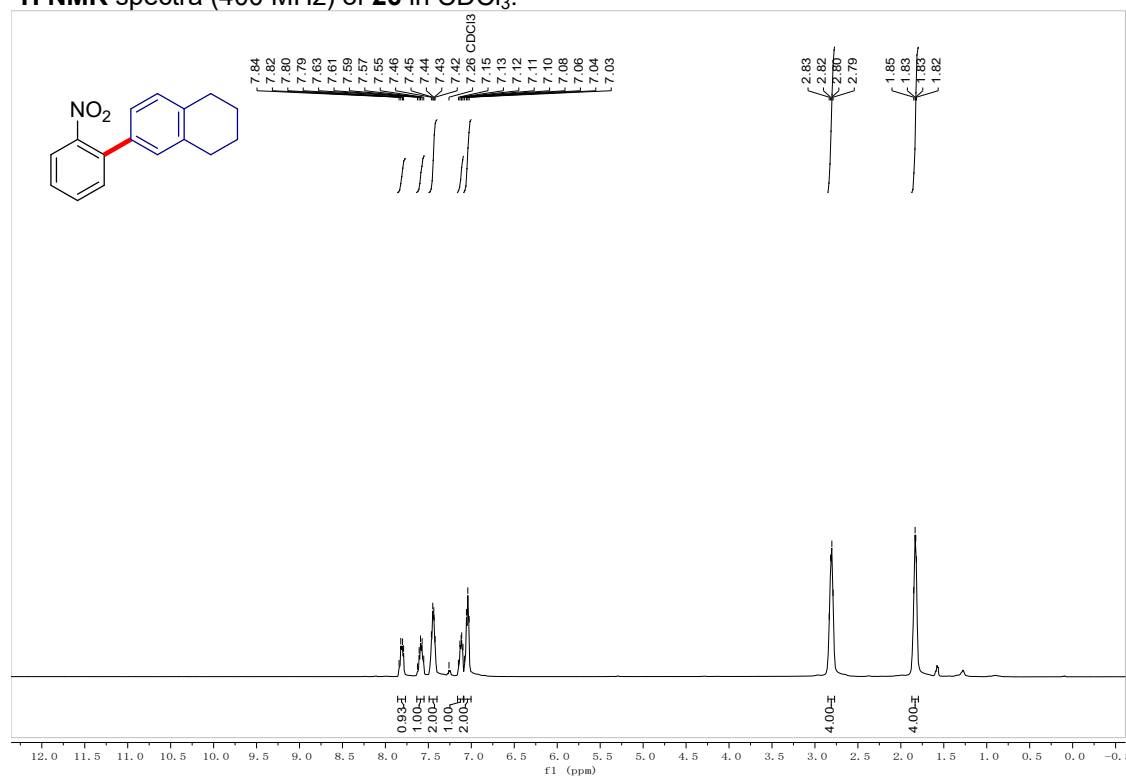

$^{13}\text{C}$  NMR spectra (101 MHz) of **26** in  $\text{CDCl}_3$ .

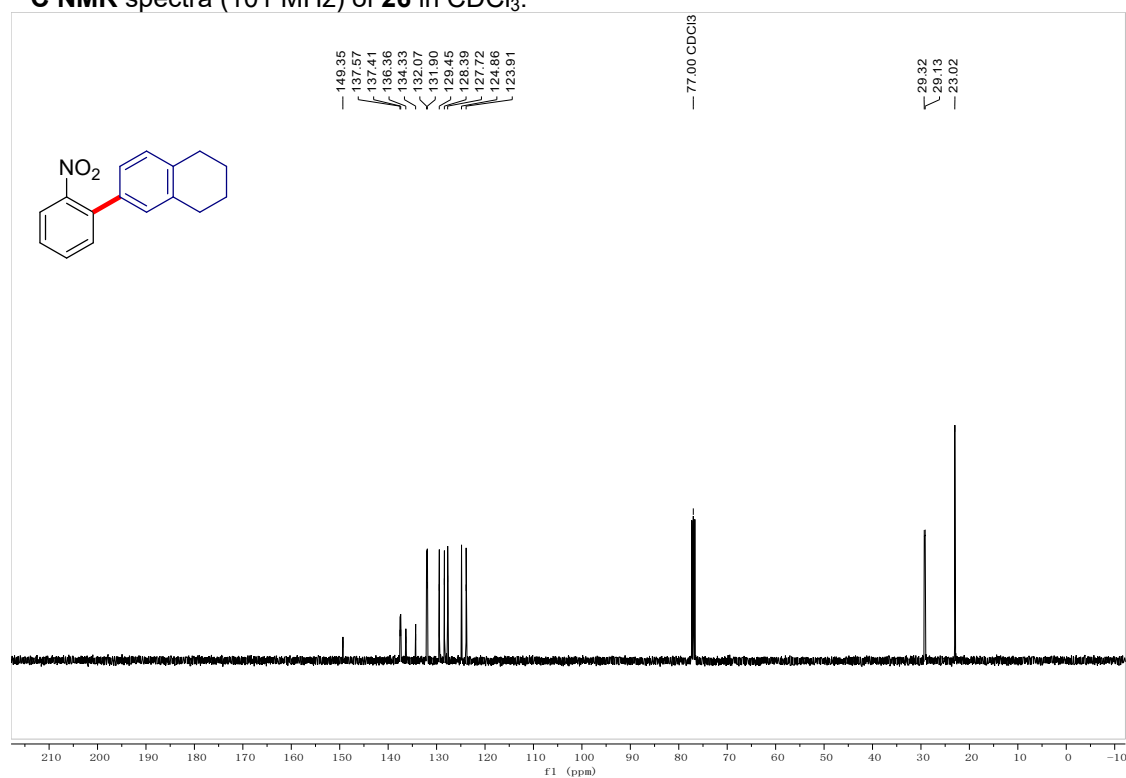

# SUPPORTING INFORMATION

$^1\text{H}$  NMR spectra (400 MHz) of **27** in  $\text{CDCl}_3$ .

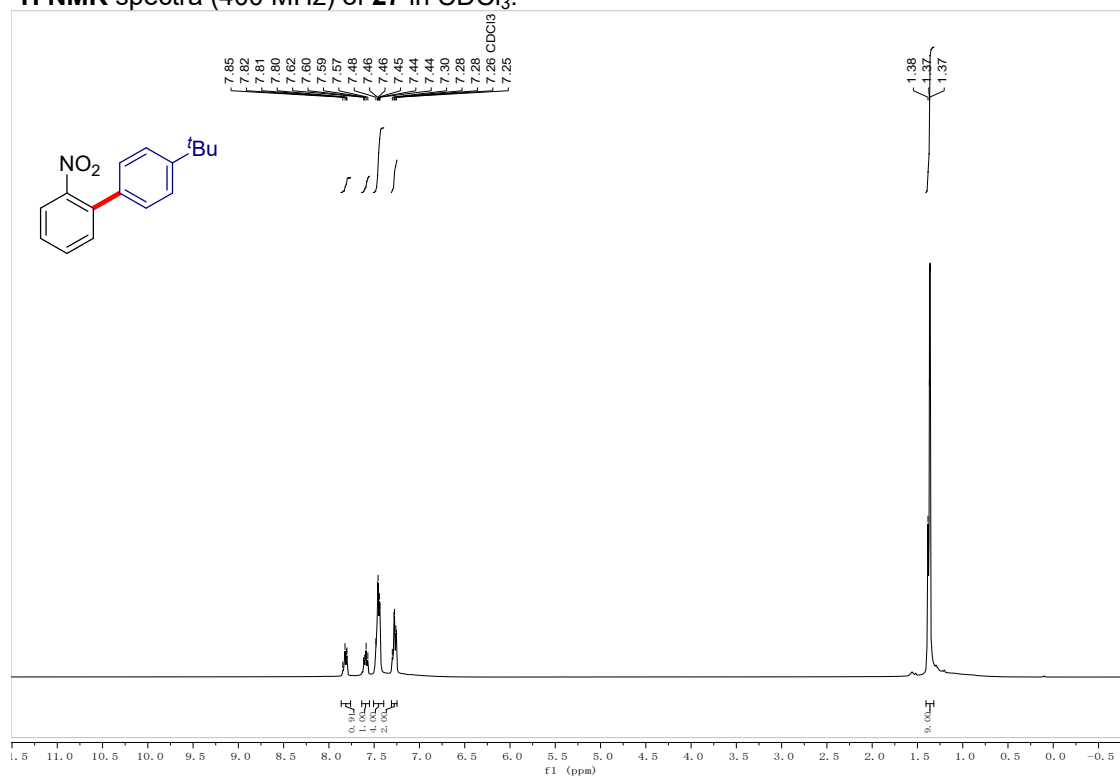

$^{13}\text{C}$  NMR spectra (101 MHz) of **27** in  $\text{CDCl}_3$ .

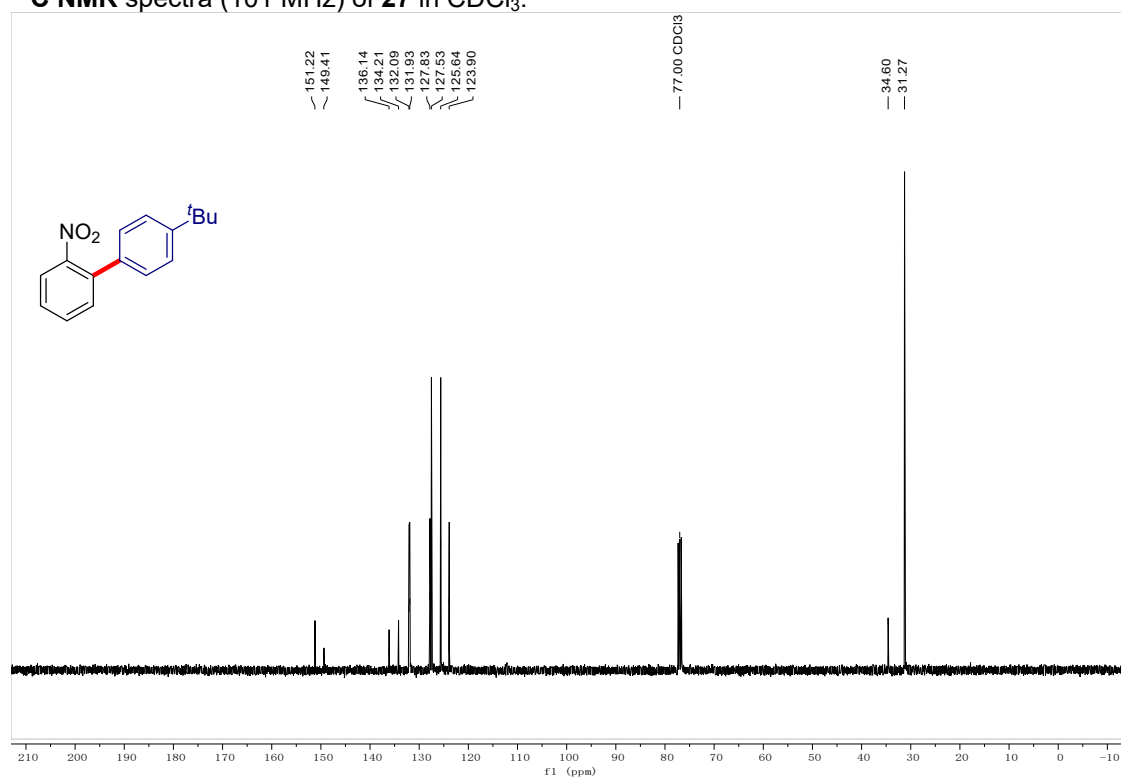

# SUPPORTING INFORMATION

$^1\text{H}$  NMR spectra (400 MHz) of **28** in  $\text{CDCl}_3$ .

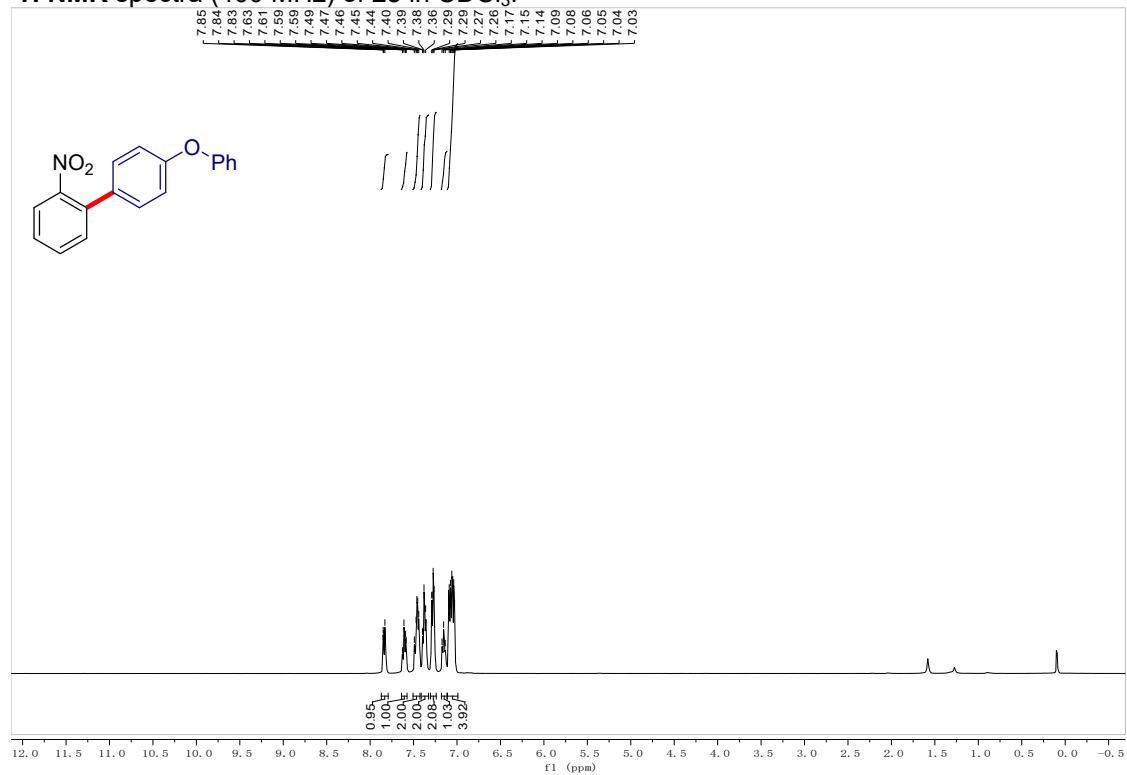

$^{13}\text{C}$  NMR spectra (101 MHz) of **28** in  $\text{CDCl}_3$ .

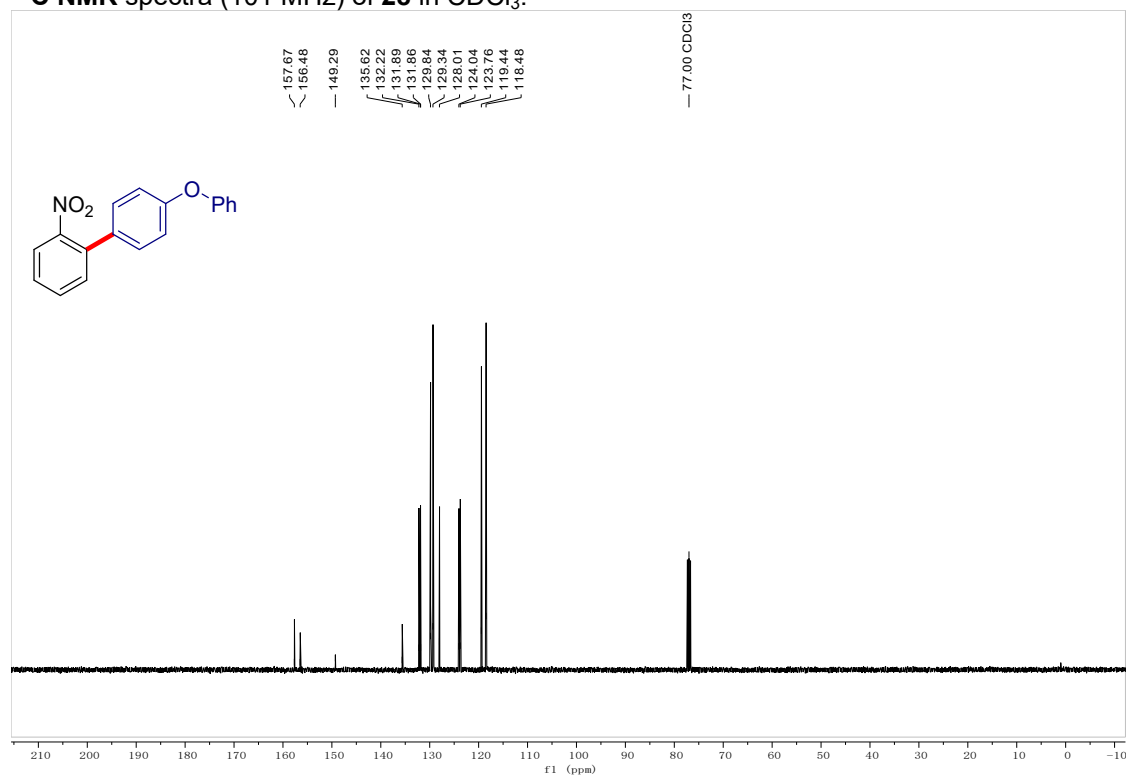

# SUPPORTING INFORMATION

$^1\text{H}$  NMR spectra (400 MHz) of **29** in  $\text{CDCl}_3$ .

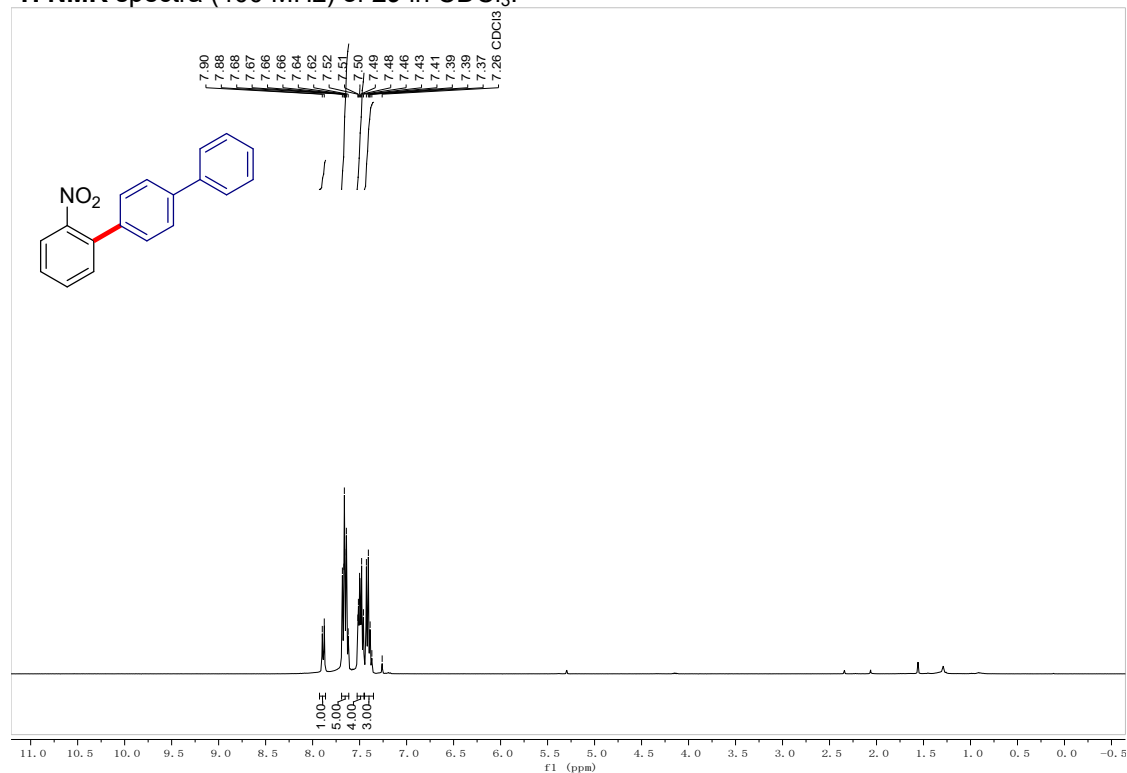

$^{13}\text{C}$  NMR spectra (101 MHz) of **29** in  $\text{CDCl}_3$ .

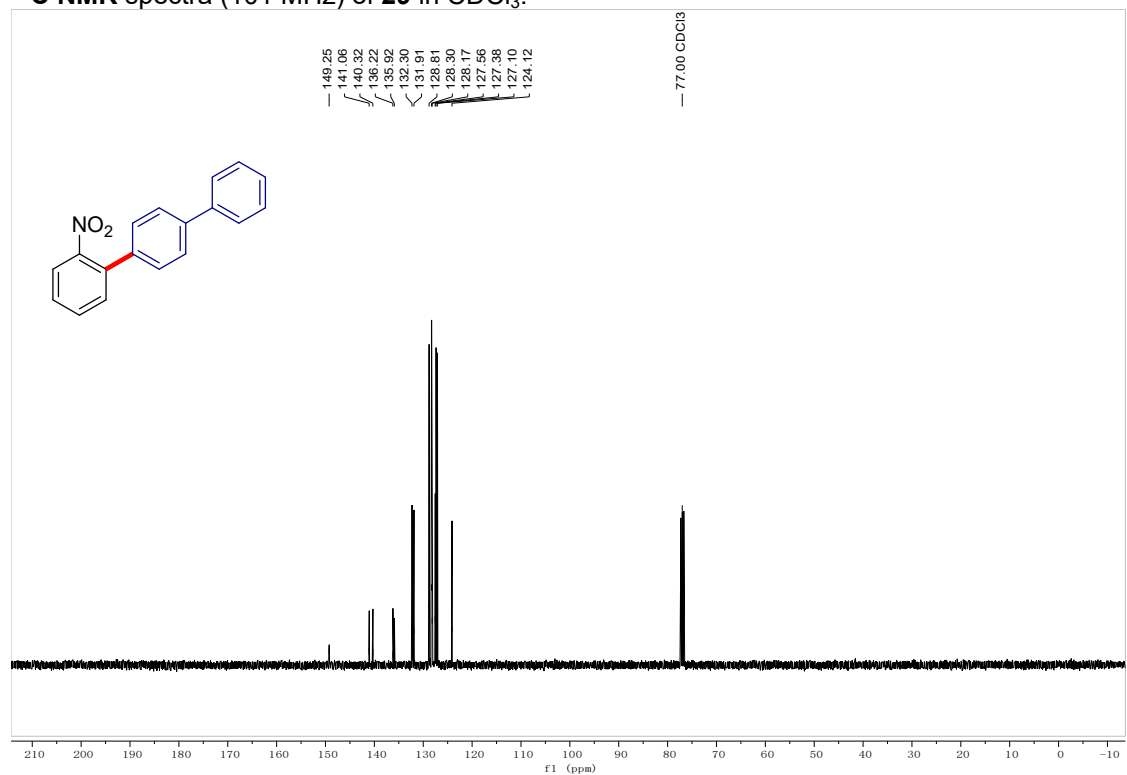

# SUPPORTING INFORMATION

$^1\text{H}$  NMR spectra (400 MHz) of **30** in  $\text{CDCl}_3$ .

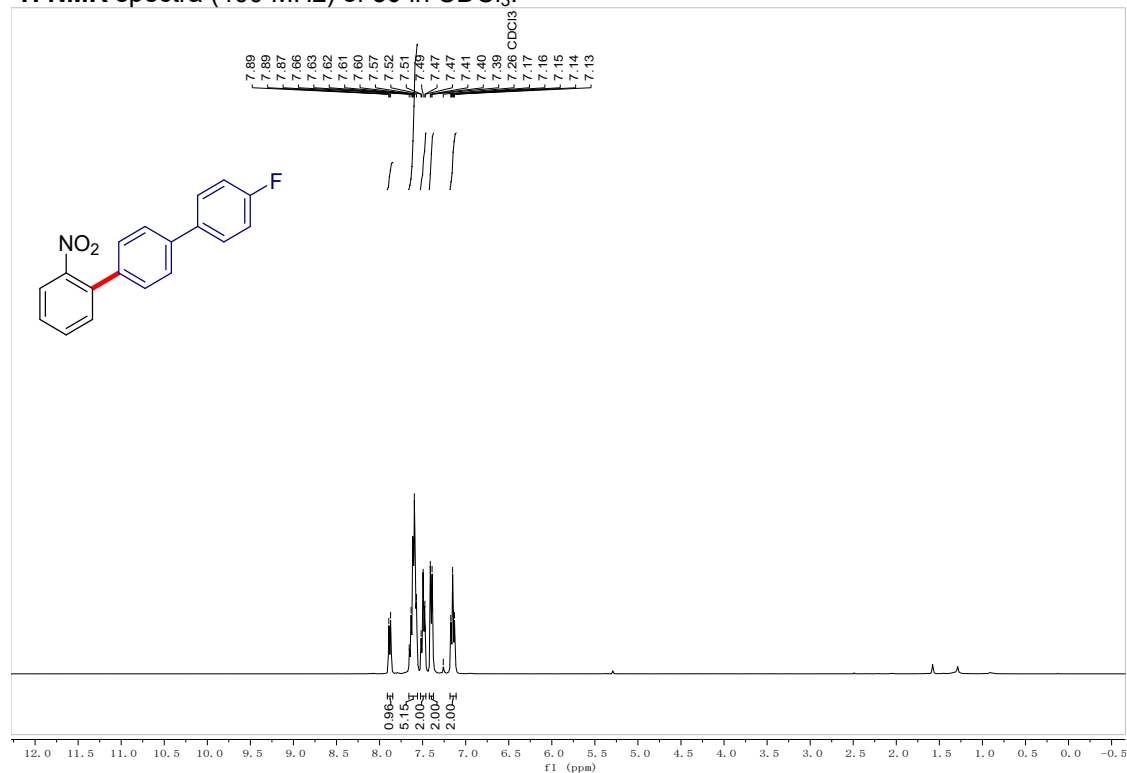

$^{13}\text{C}$  NMR spectra (101 MHz) of **30** in  $\text{CDCl}_3$ .

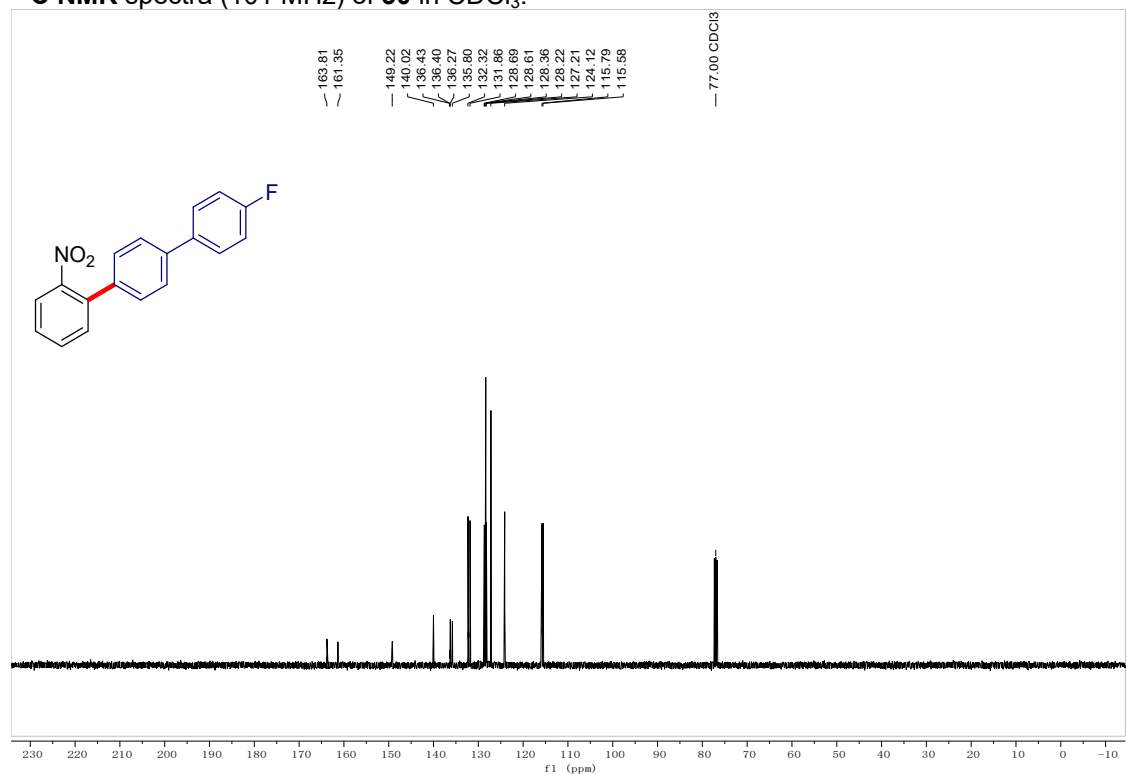

## SUPPORTING INFORMATION

$^{19}\text{F}$  NMR spectra (377 MHz) of **30** in  $\text{CDCl}_3$ .

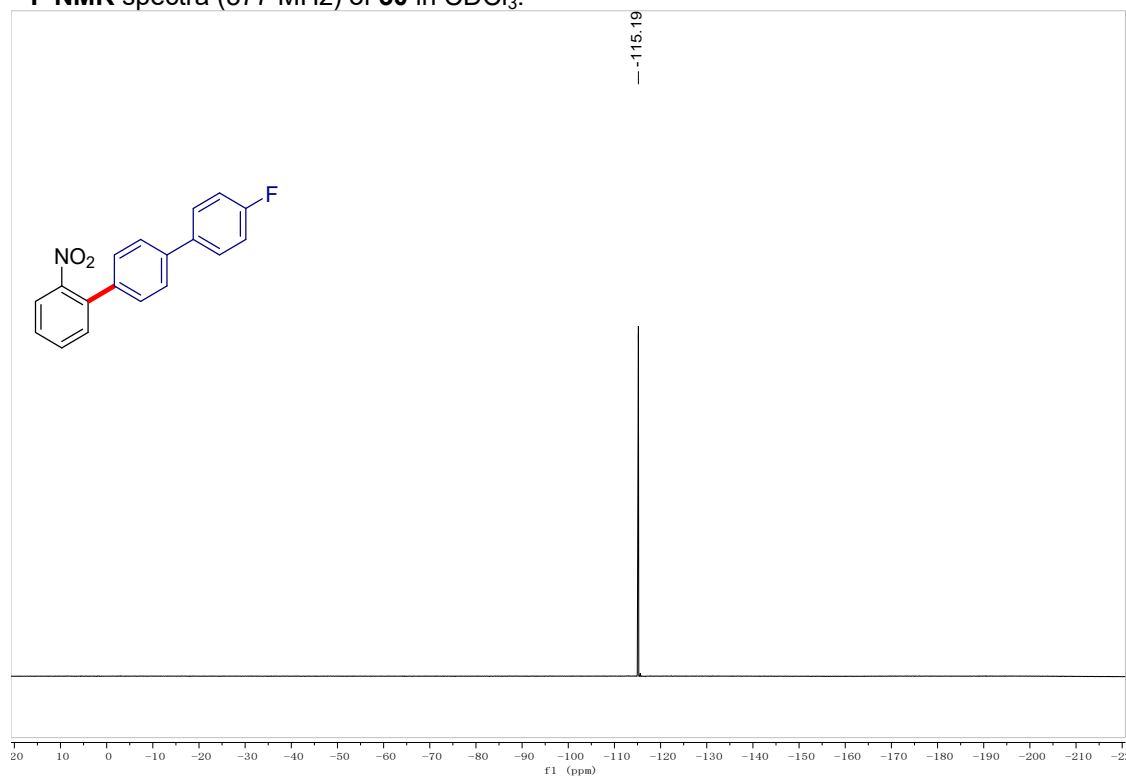

# SUPPORTING INFORMATION

$^1\text{H}$  NMR spectra (400 MHz) of **31** in  $\text{CDCl}_3$ .

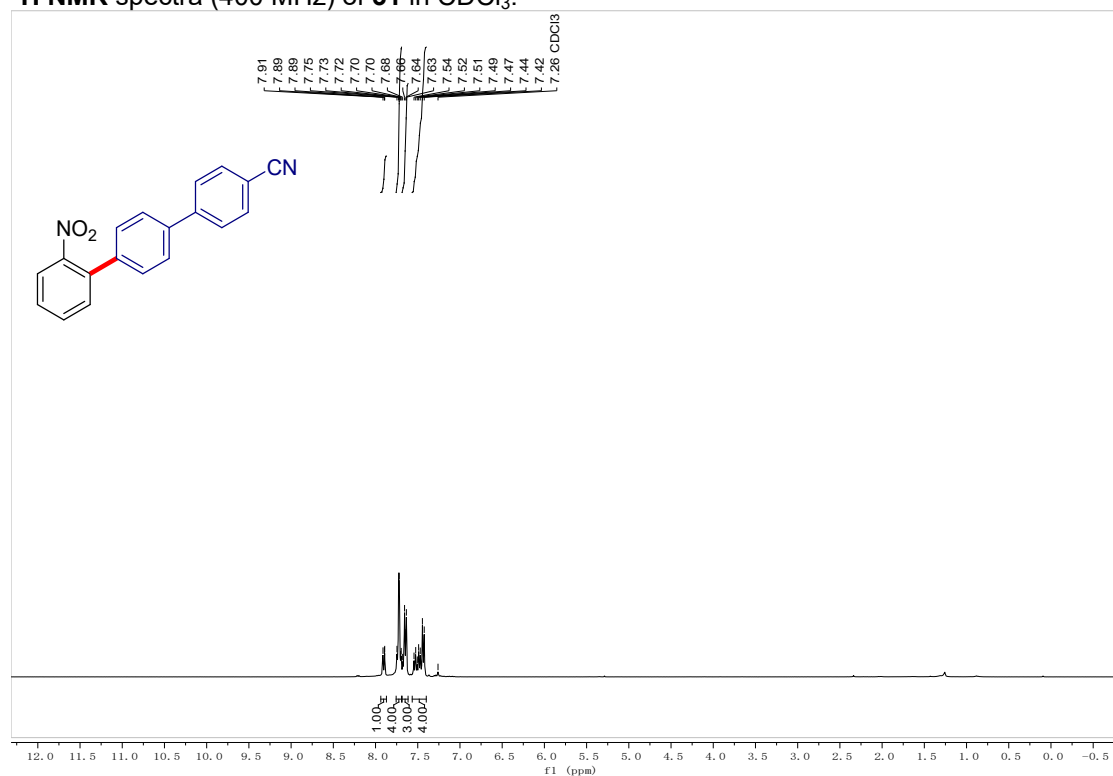

$^{13}\text{C}$  NMR spectra (101 MHz) of **31** in  $\text{CDCl}_3$ .

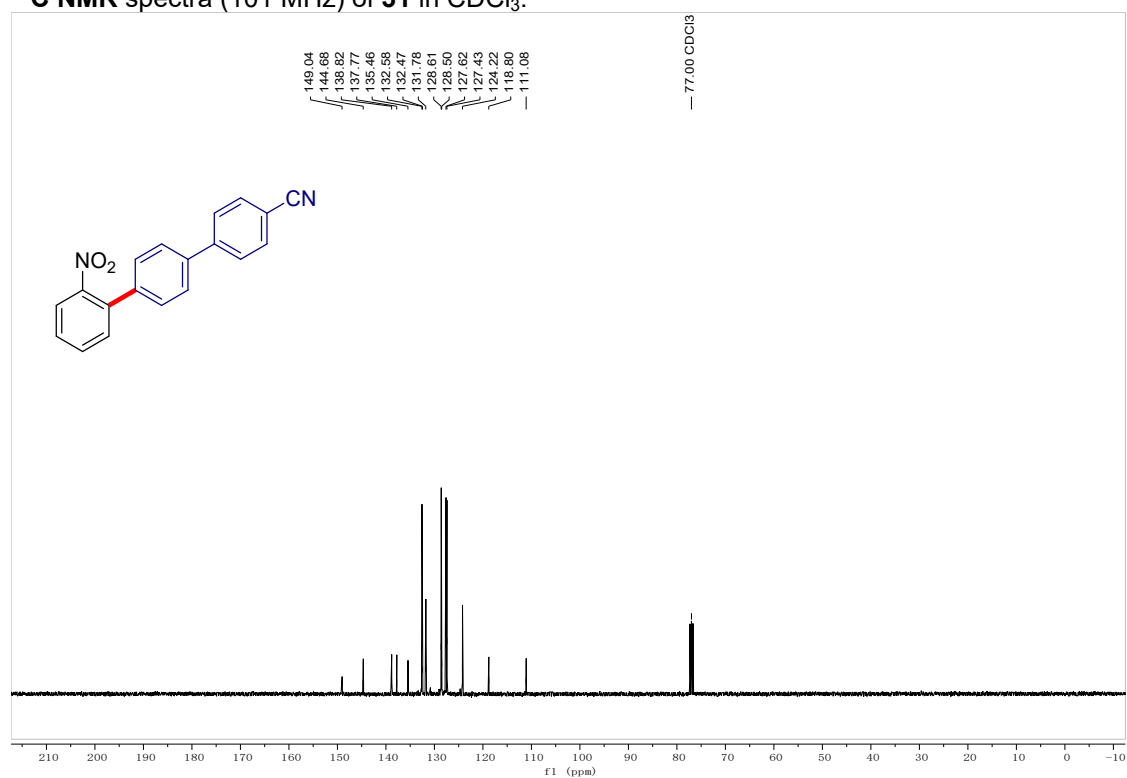

# SUPPORTING INFORMATION

<sup>1</sup>H NMR spectra (400 MHz) of **32** in CDCl<sub>3</sub>.

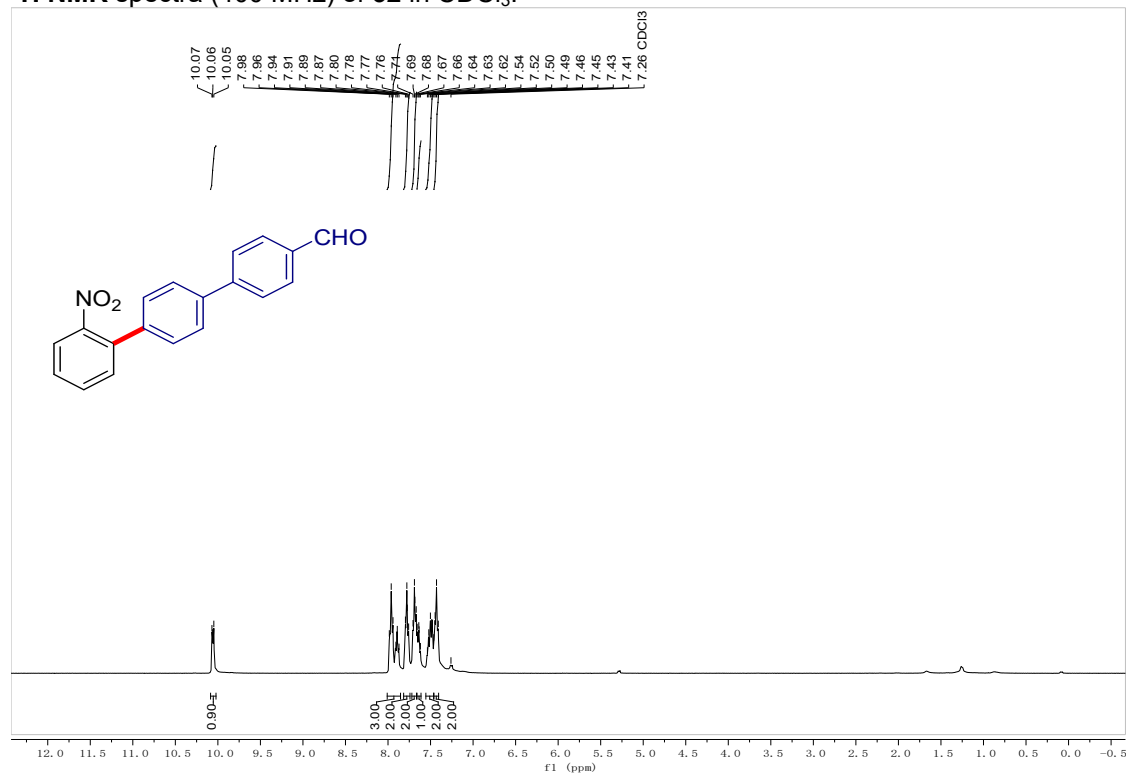

<sup>13</sup>C NMR spectra (101 MHz) of **32** in CDCl<sub>3</sub>.

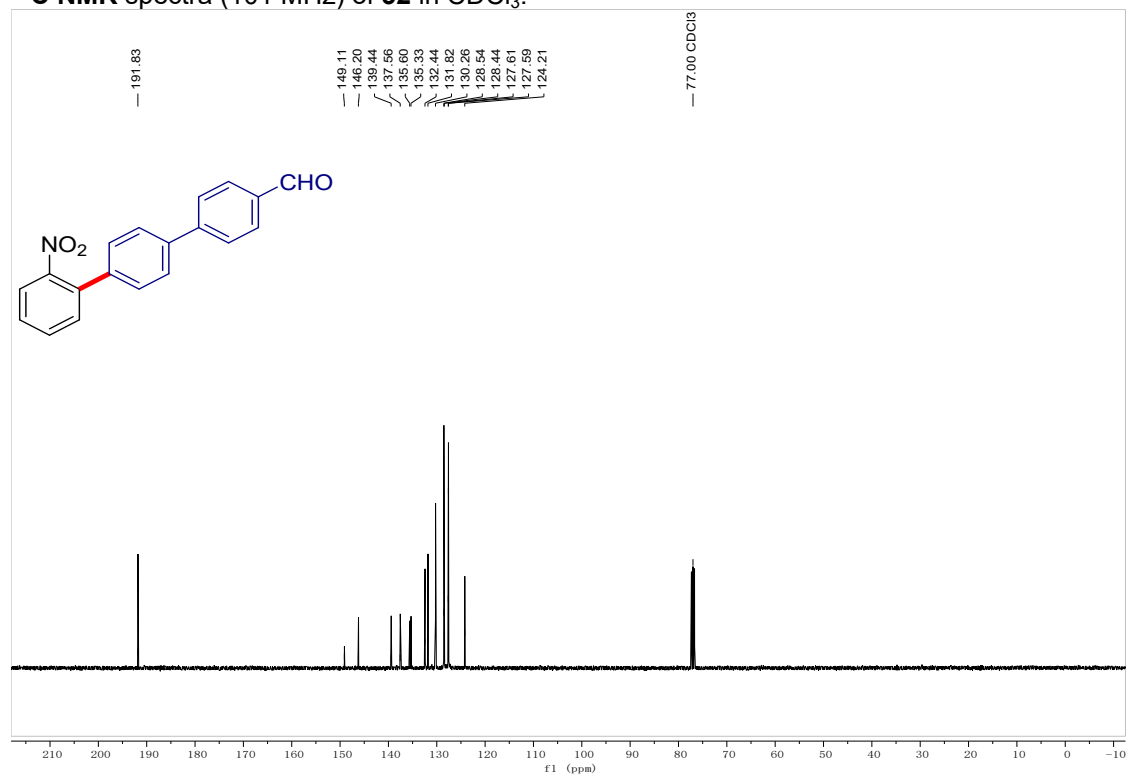

# SUPPORTING INFORMATION

<sup>1</sup>H NMR spectra (400 MHz) of **33** in CDCl<sub>3</sub>.

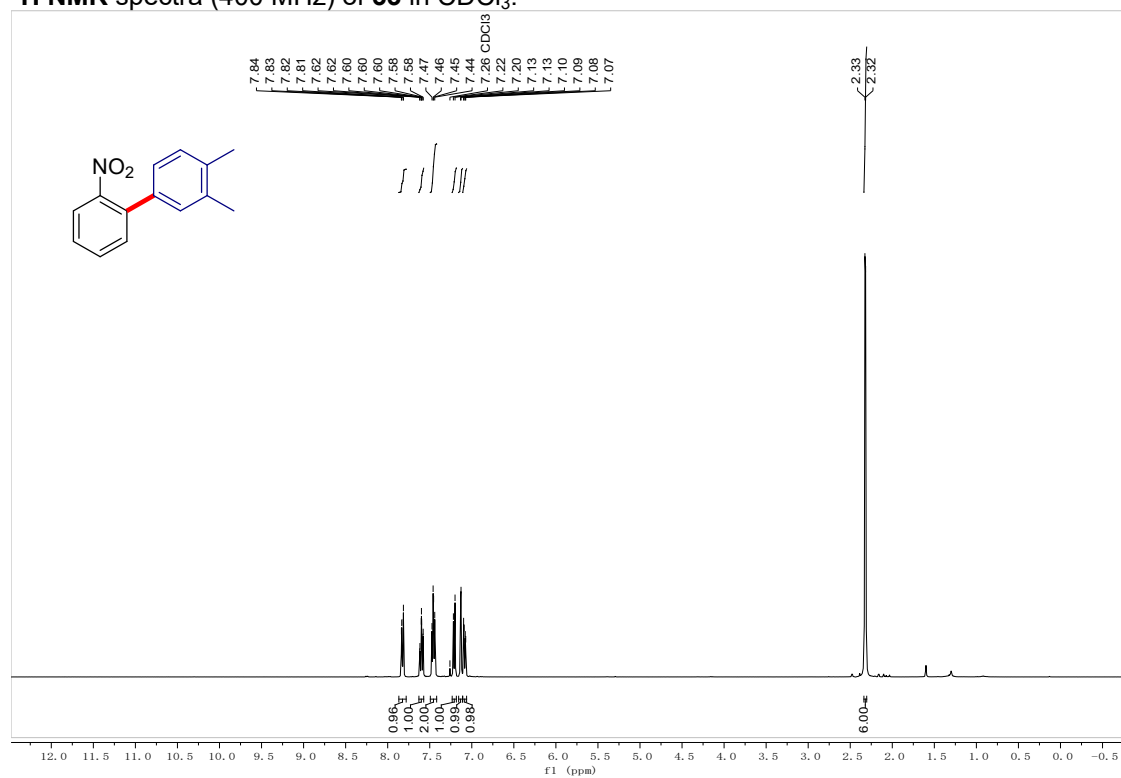

<sup>13</sup>C NMR spectra (101 MHz) of **33** in CDCl<sub>3</sub>.

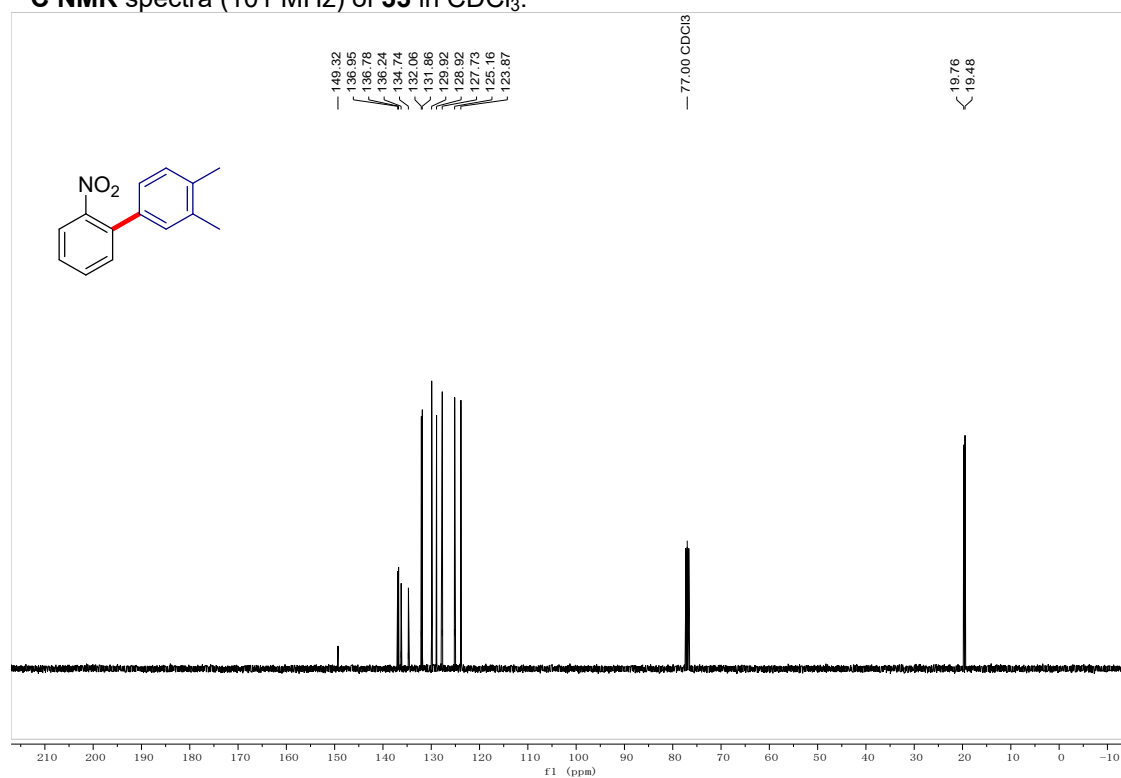

# SUPPORTING INFORMATION

<sup>1</sup>H NMR spectra (400 MHz) of **34** in CDCl<sub>3</sub>.

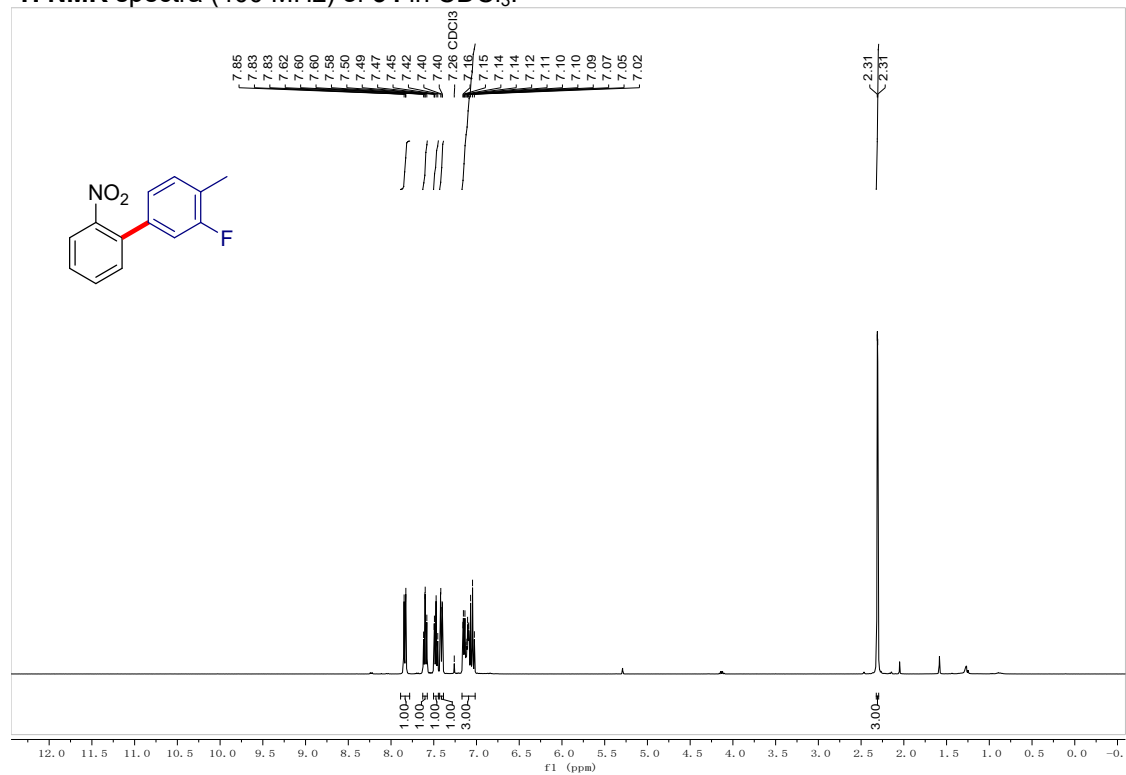

<sup>13</sup>C NMR spectra (101 MHz) of **34** in CDCl<sub>3</sub>.

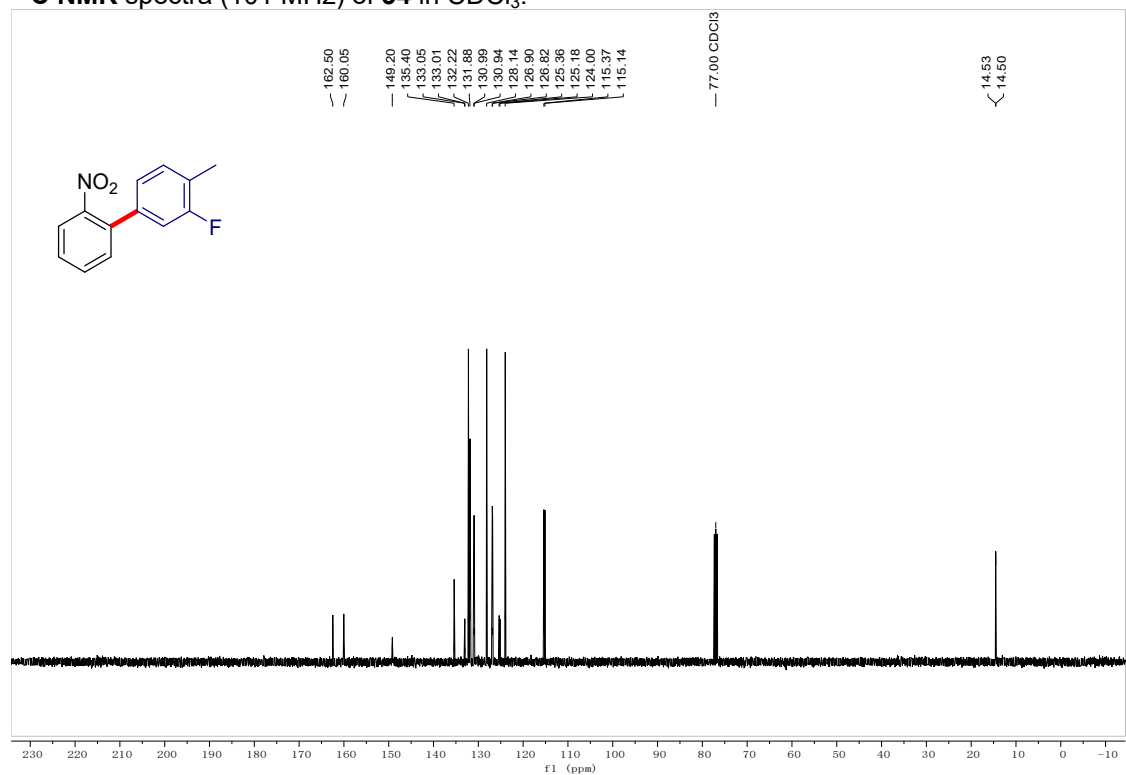

## SUPPORTING INFORMATION

$^{19}\text{F}$  NMR spectra (377 MHz) of **34** in  $\text{CDCl}_3$ .

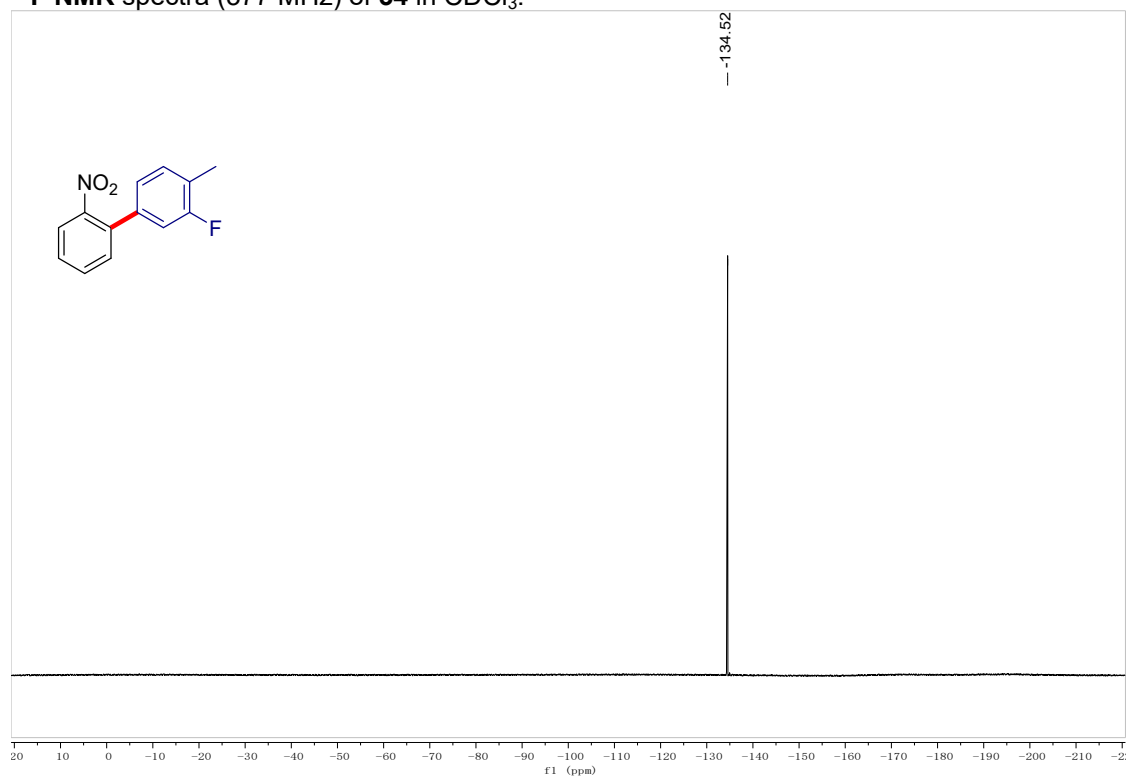

# SUPPORTING INFORMATION

<sup>1</sup>H NMR spectra (400 MHz) of **35** in CDCl<sub>3</sub>.

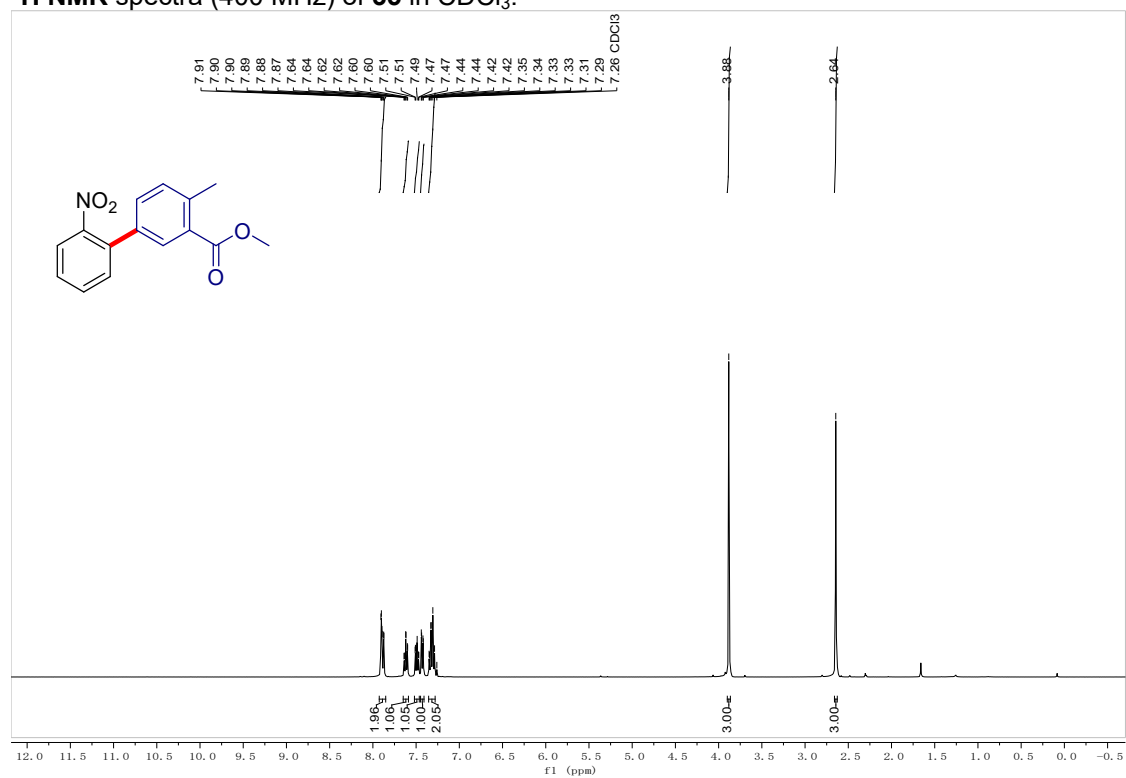

<sup>13</sup>C NMR spectra (101 MHz) of **35** in CDCl<sub>3</sub>.

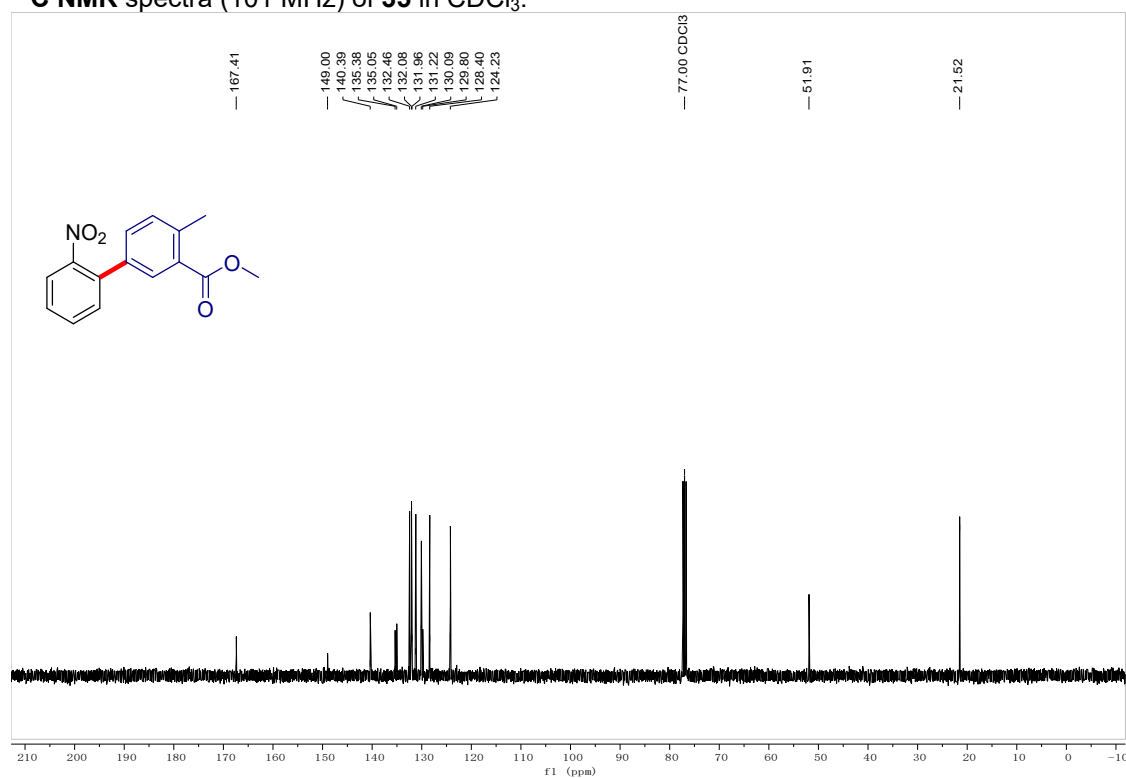

# SUPPORTING INFORMATION

$^1\text{H}$  NMR spectra (400 MHz) of **36** in  $\text{CDCl}_3$ .

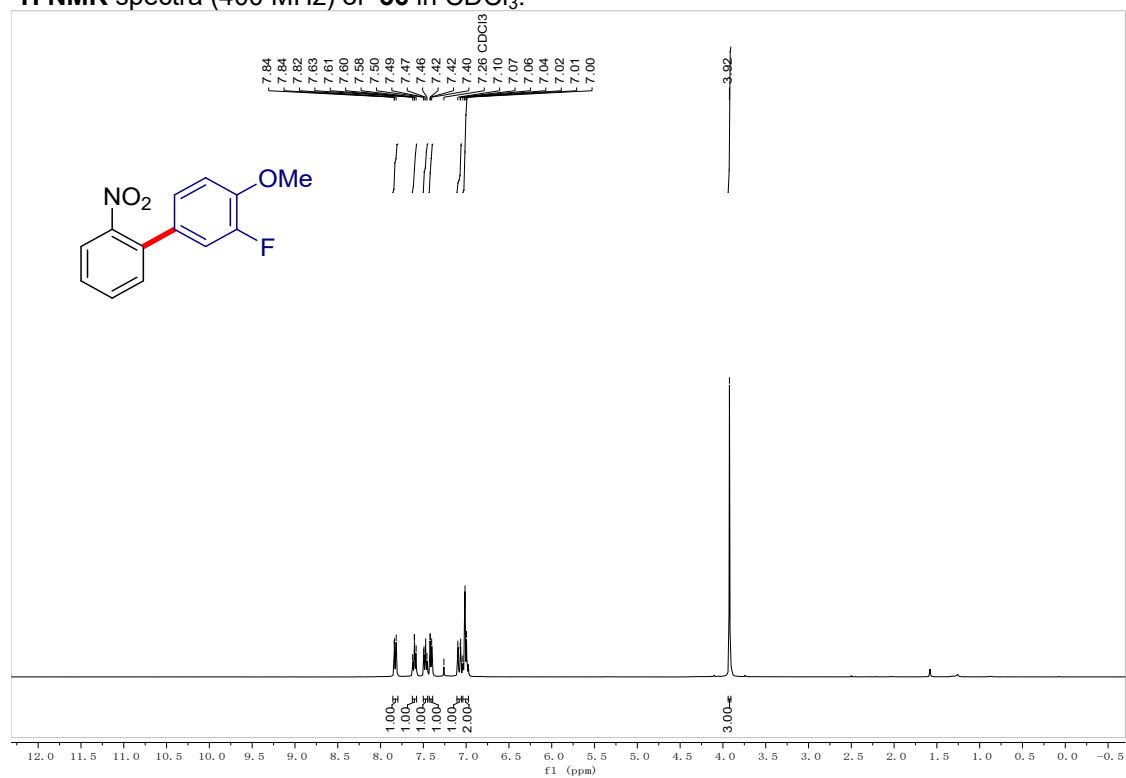

$^{13}\text{C}$  NMR spectra (101 MHz) of **36** in  $\text{CDCl}_3$ .

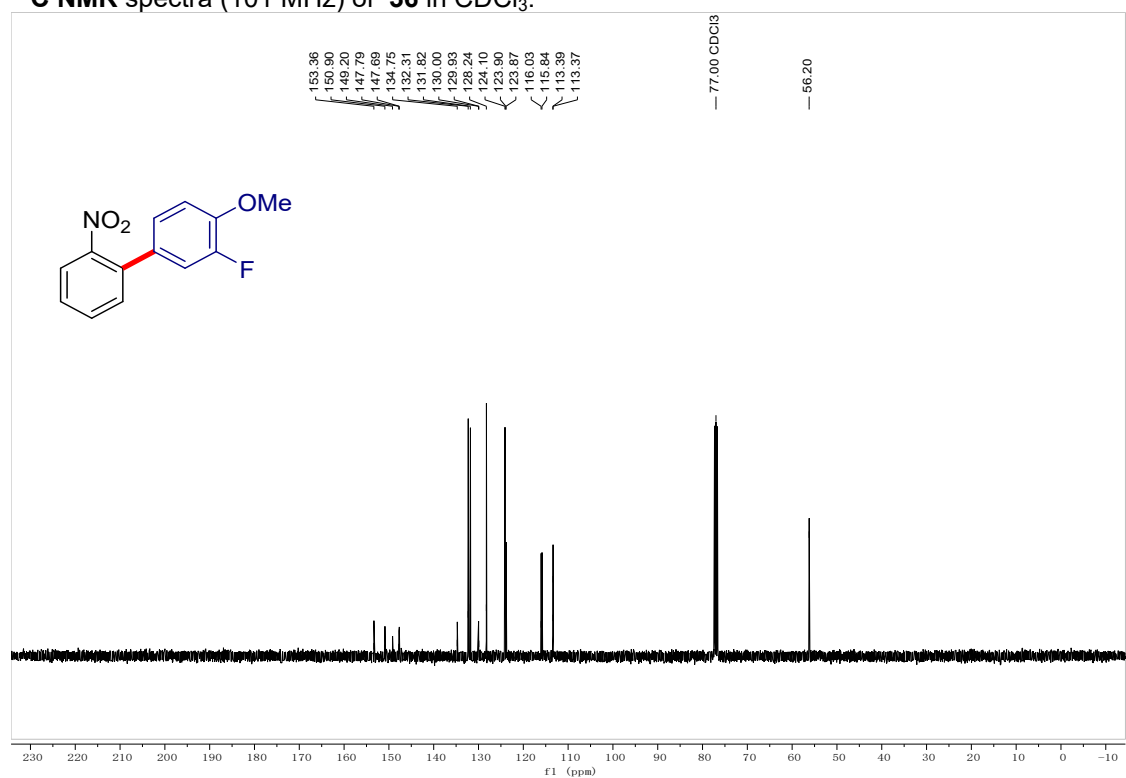

## SUPPORTING INFORMATION

$^{19}\text{F}$  NMR spectra (101 MHz) of **36** in  $\text{CDCl}_3$ .

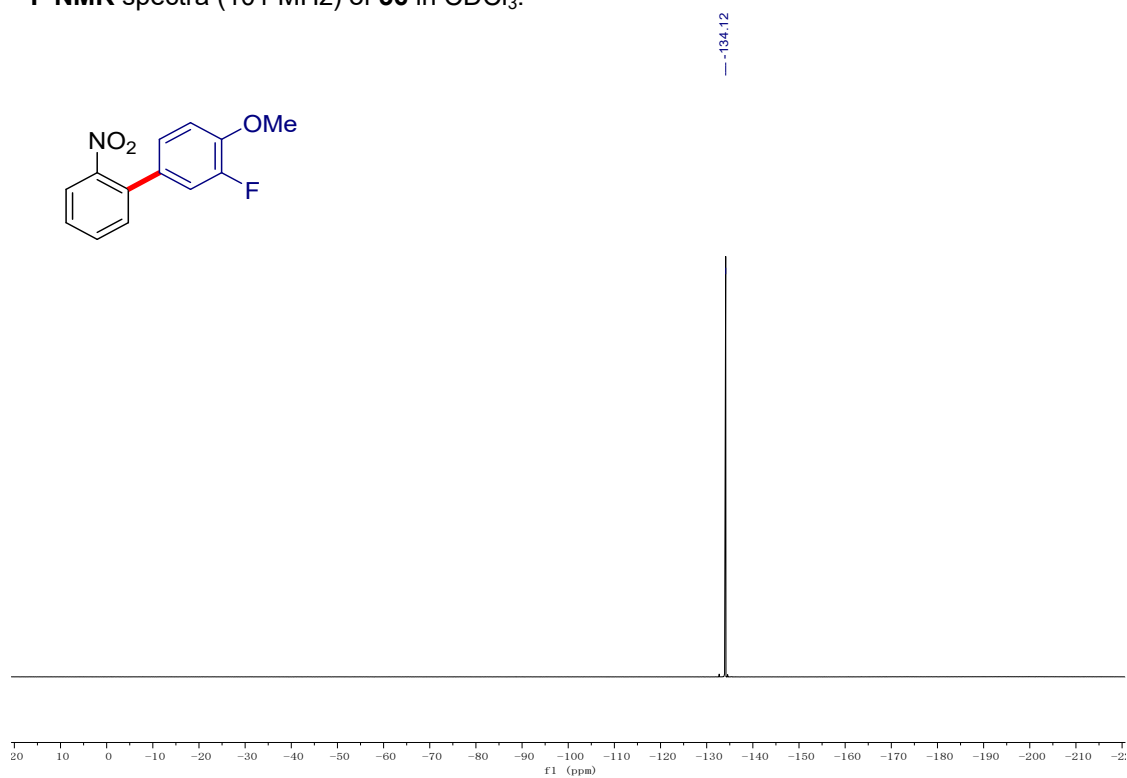

# SUPPORTING INFORMATION

<sup>1</sup>H NMR spectra (400 MHz) of **37** in CDCl<sub>3</sub>.

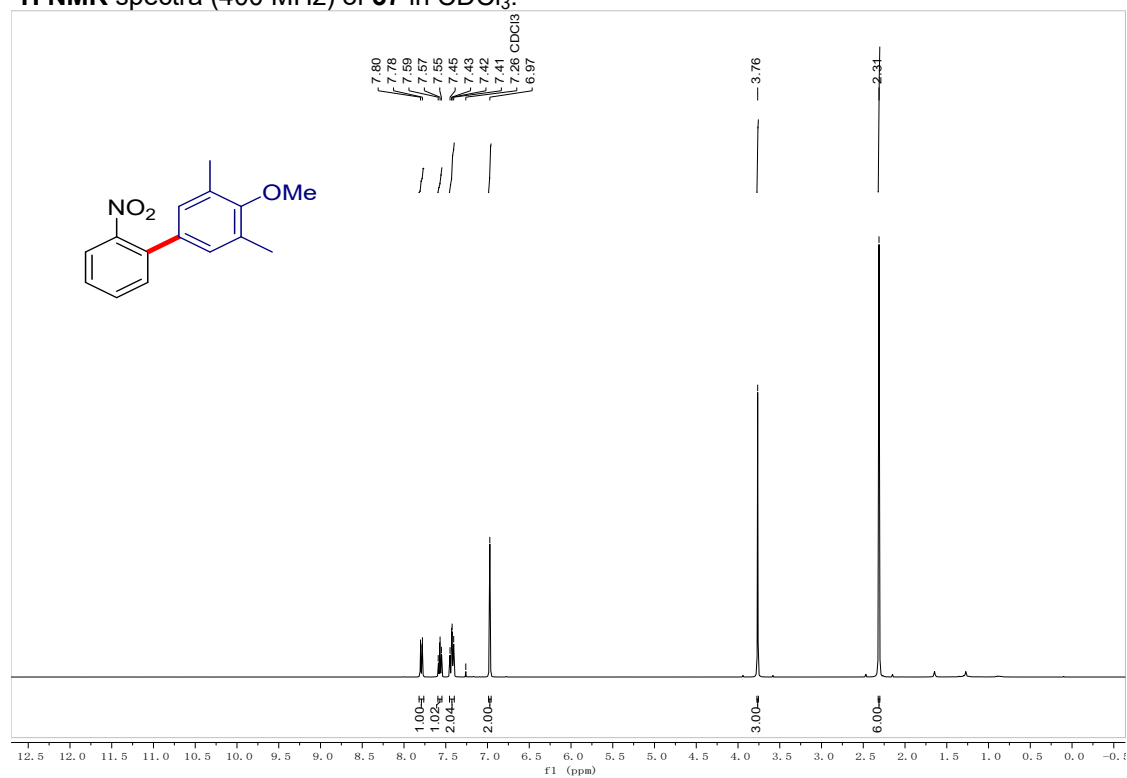

<sup>13</sup>C NMR spectra (101 MHz) of **37** in CDCl<sub>3</sub>.

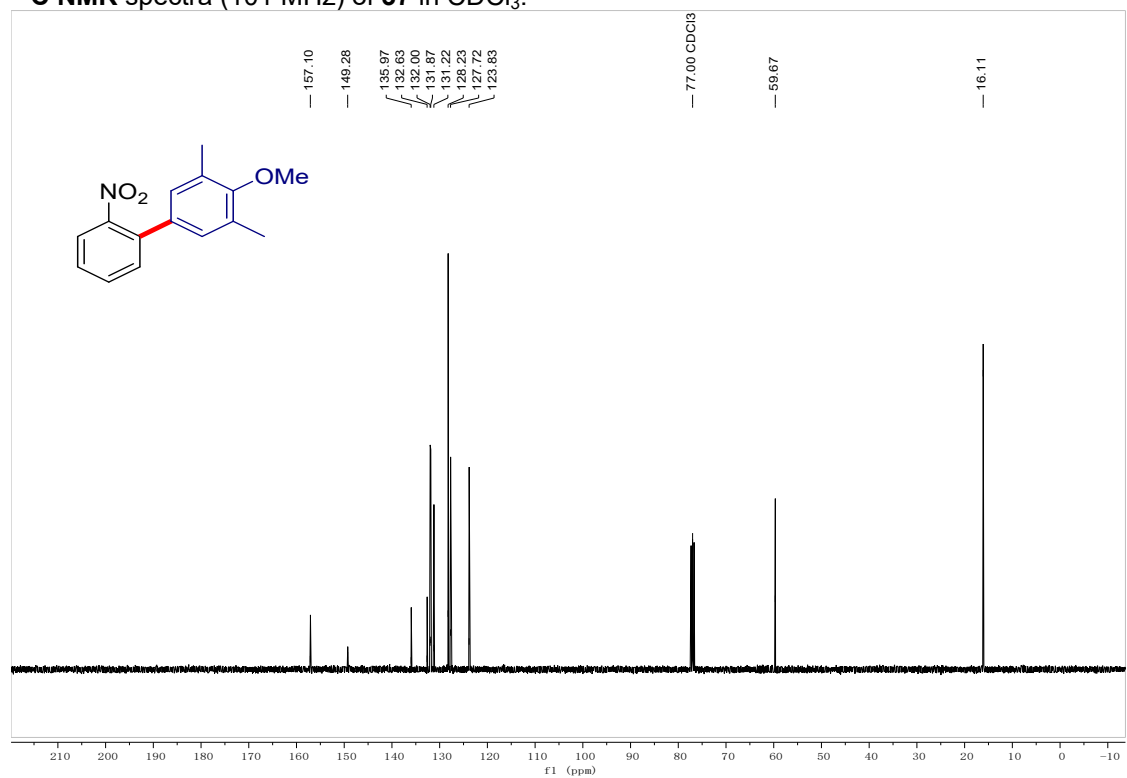

# SUPPORTING INFORMATION

$^1\text{H}$  NMR spectra (400 MHz) of **38** in  $\text{CDCl}_3$ .

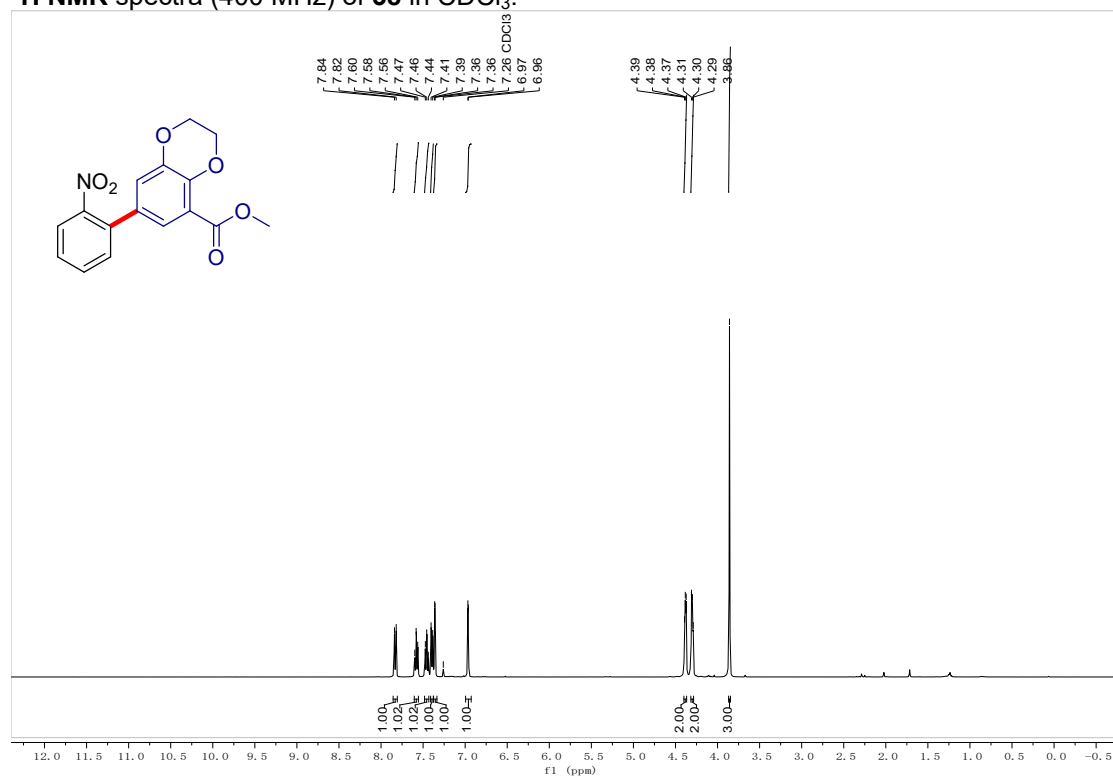

$^{13}\text{C}$  NMR spectra (101 MHz) of **38** in  $\text{CDCl}_3$ .

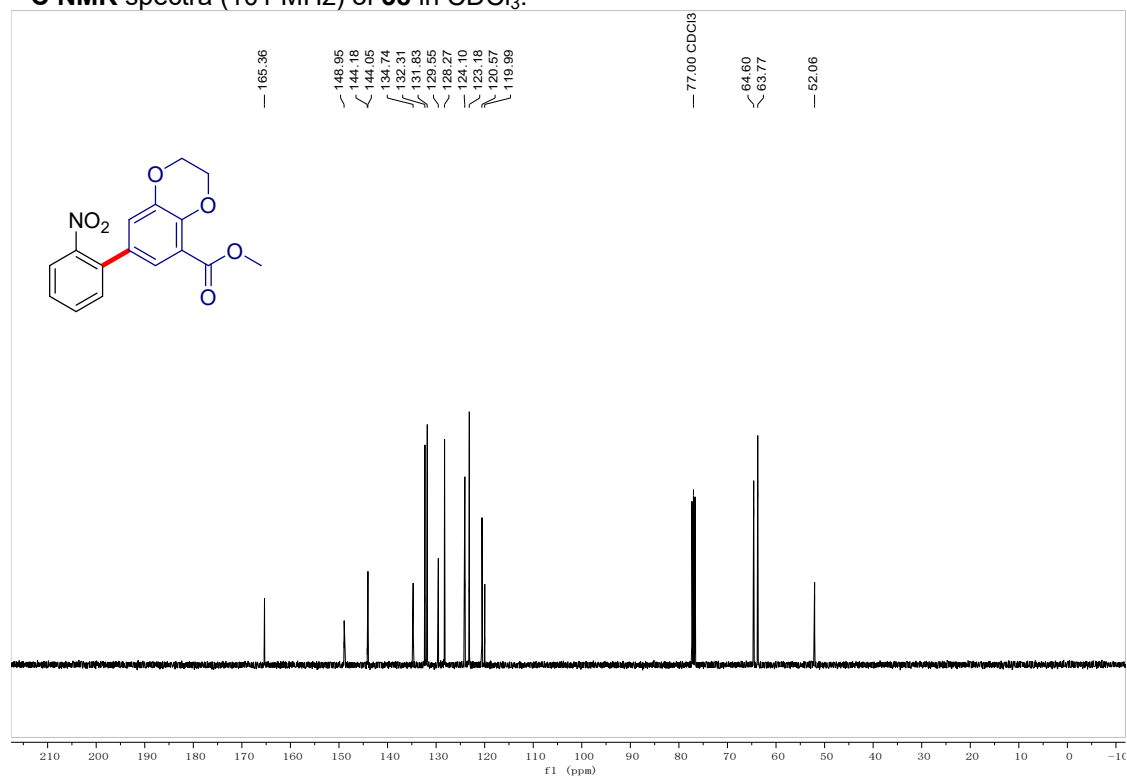

# SUPPORTING INFORMATION

**<sup>1</sup>H NMR spectra (400 MHz) of **39** in CDCl<sub>3</sub>.**

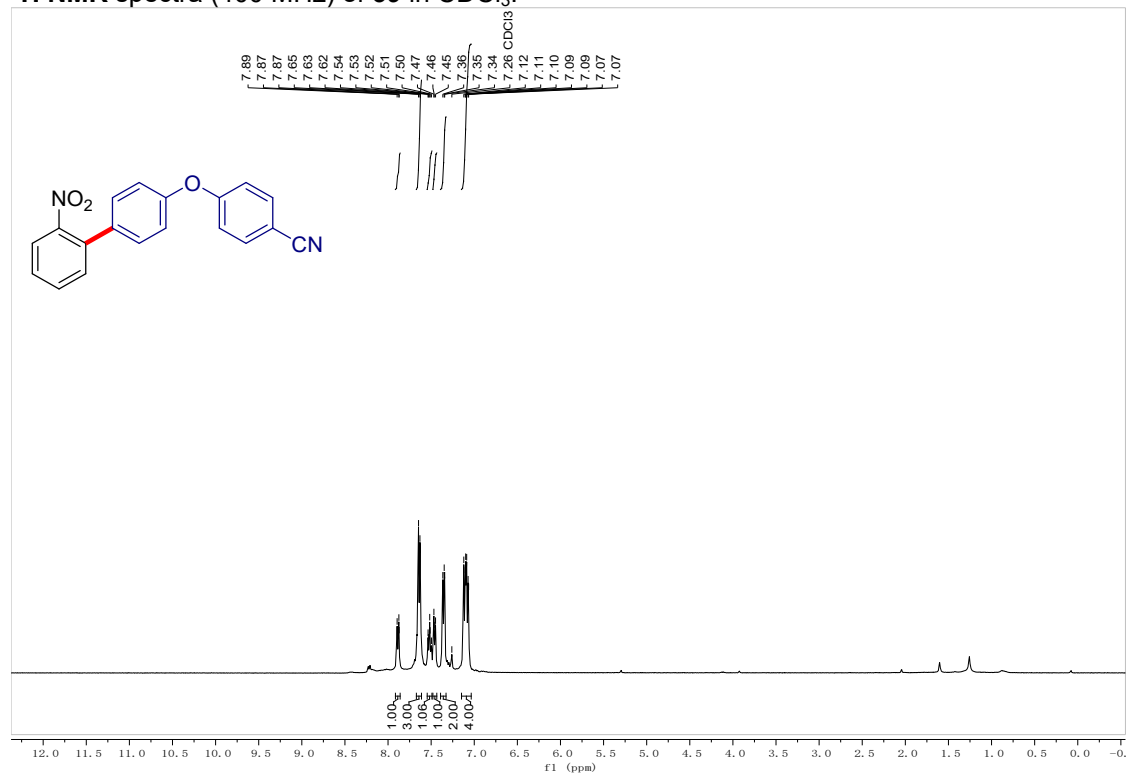

**<sup>13</sup>C NMR spectra (101 MHz) of **39** in CDCl<sub>3</sub>.**

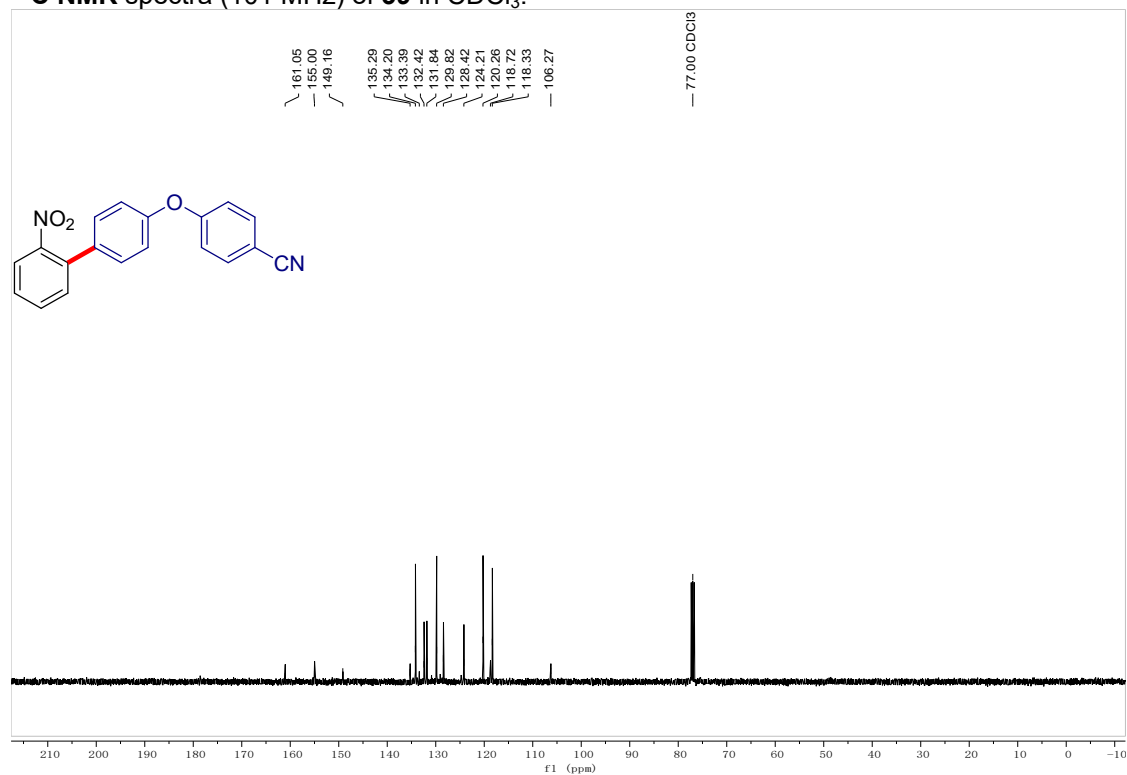

# SUPPORTING INFORMATION

<sup>1</sup>H NMR spectra (400 MHz) of **40** in CDCl<sub>3</sub>.

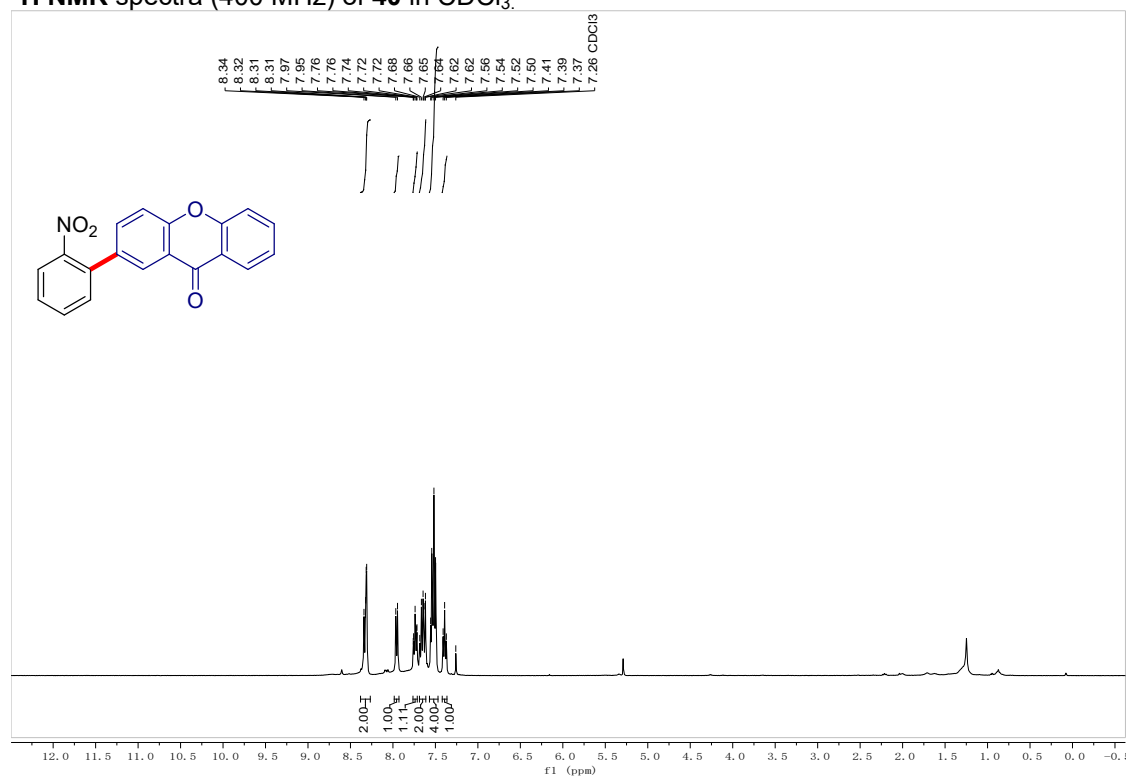

<sup>13</sup>C NMR spectra (101 MHz) of **40** in CDCl<sub>3</sub>.

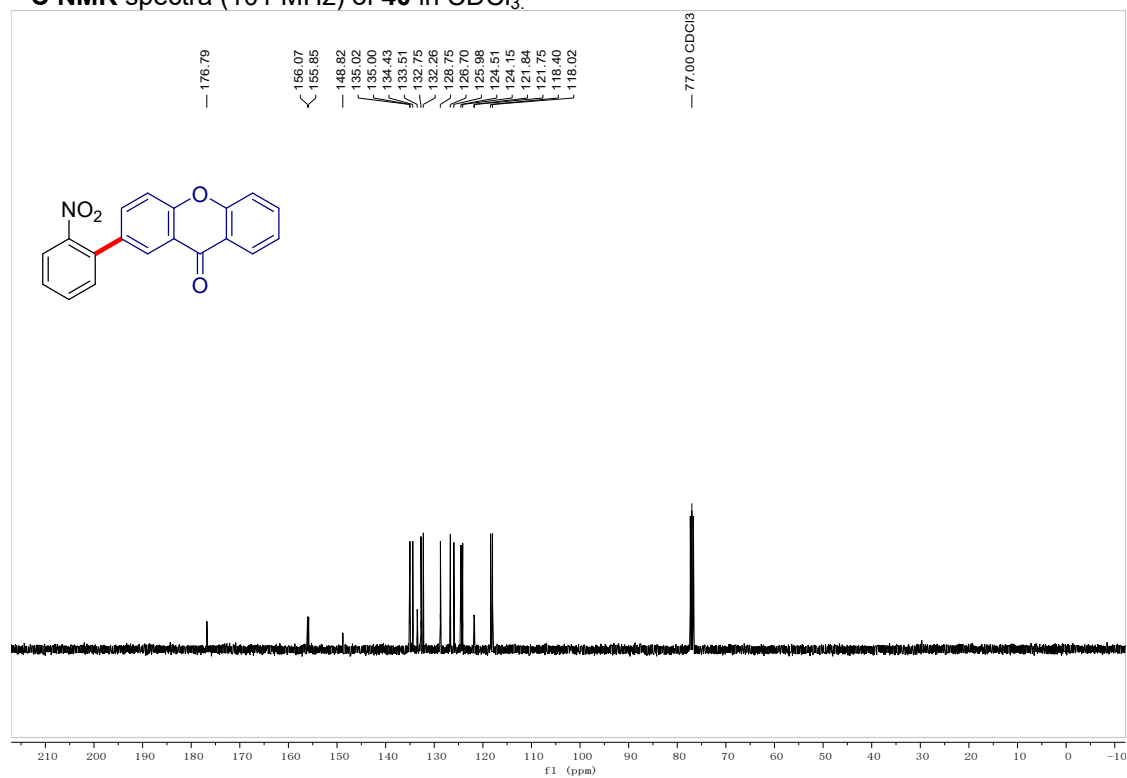

# SUPPORTING INFORMATION

$^1\text{H}$  NMR spectra (400 MHz) of **41** in  $\text{CDCl}_3$ .

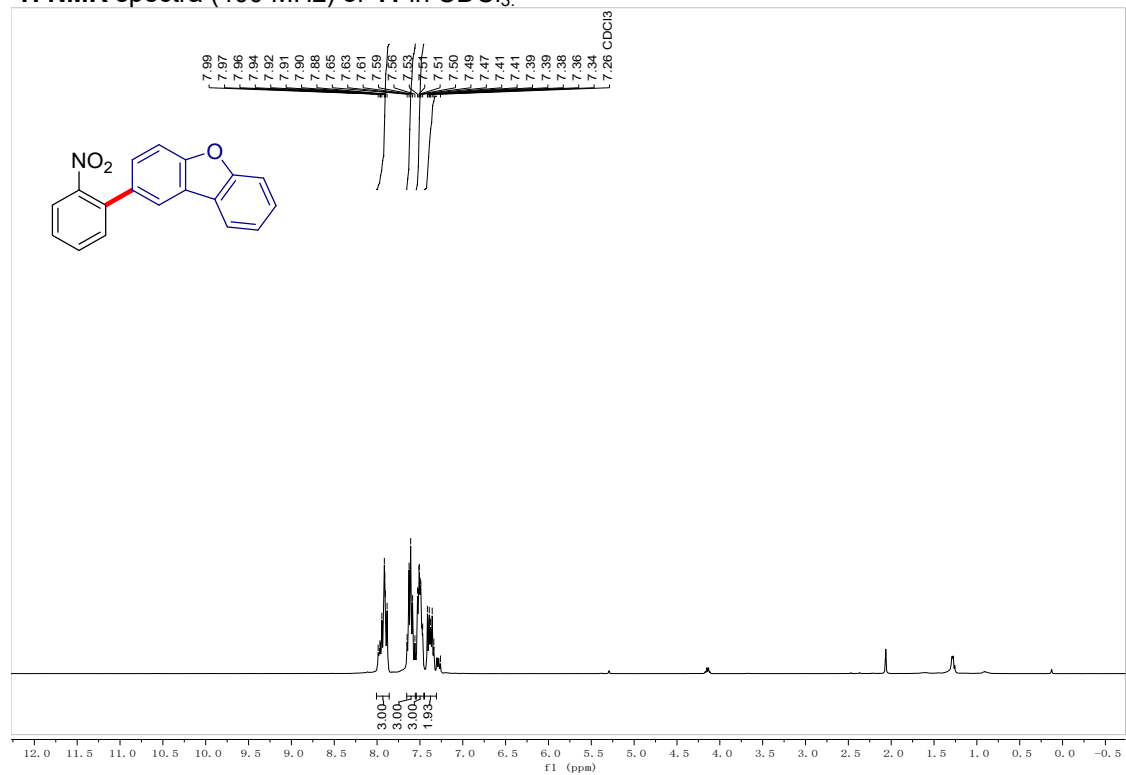

$^{13}\text{C}$  NMR spectra (101 MHz) of **41** in  $\text{CDCl}_3$ .

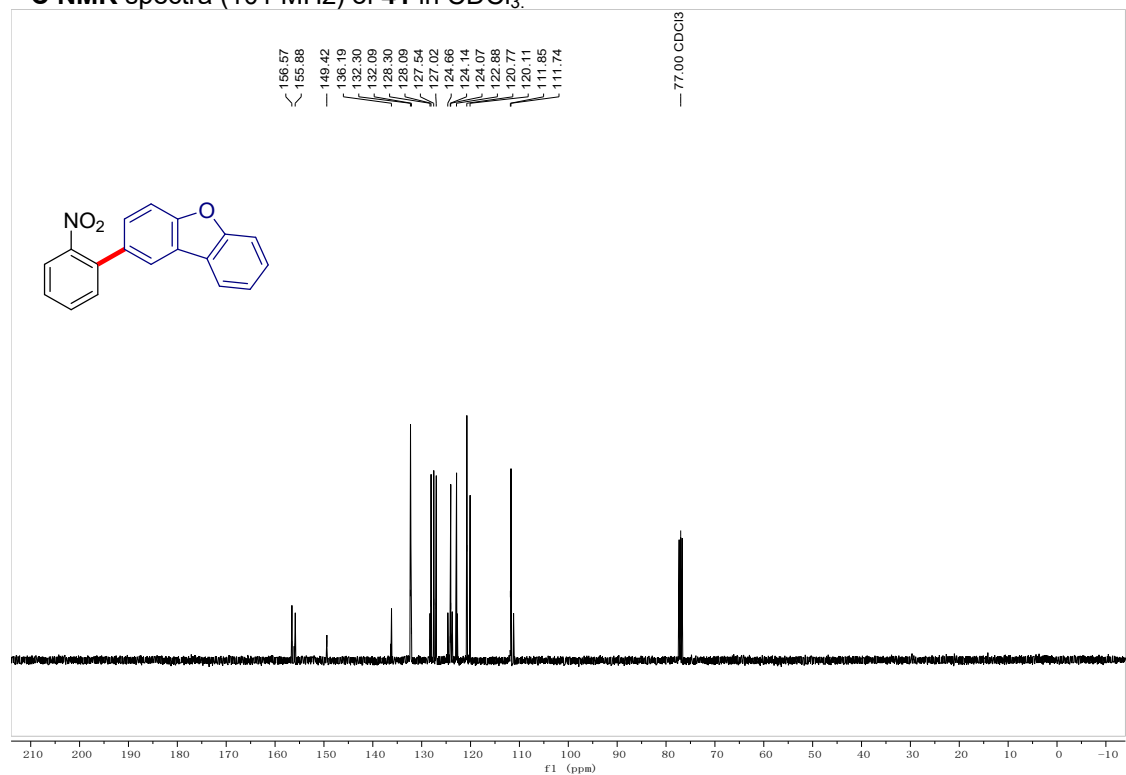

# SUPPORTING INFORMATION

<sup>1</sup>H NMR spectra (400 MHz) of **42** in CDCl<sub>3</sub>.

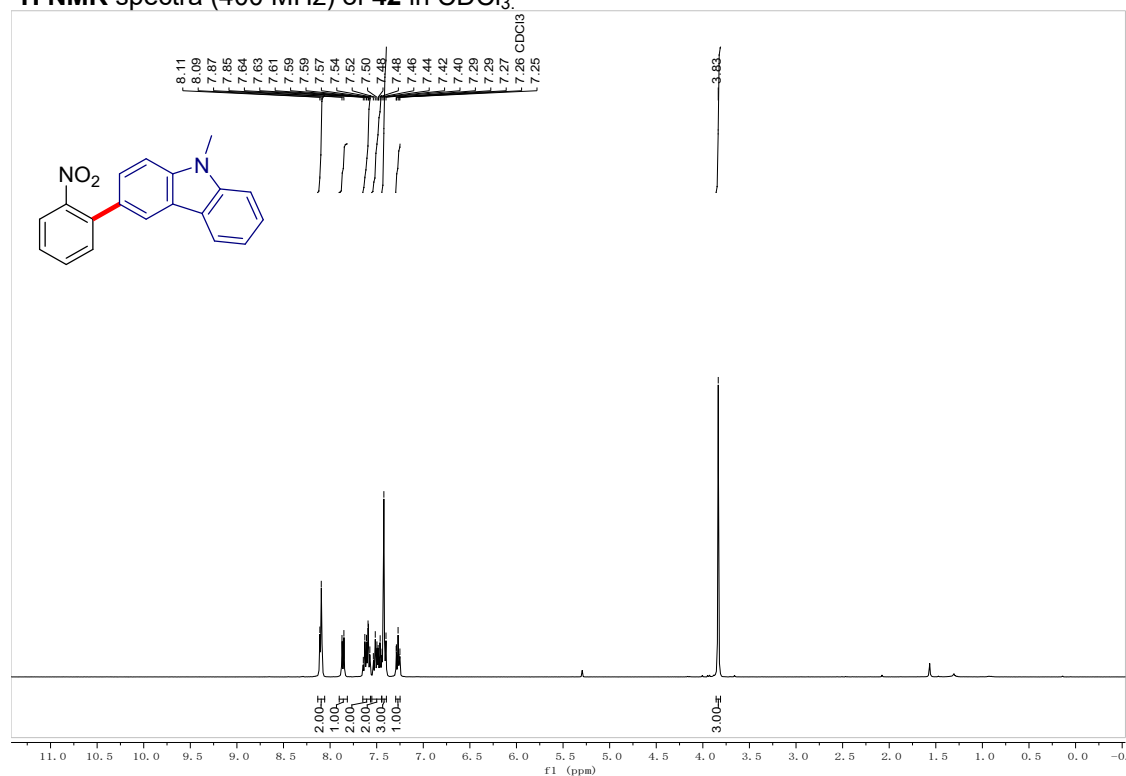

<sup>13</sup>C NMR spectra (101 MHz) of **42** in CDCl<sub>3</sub>.

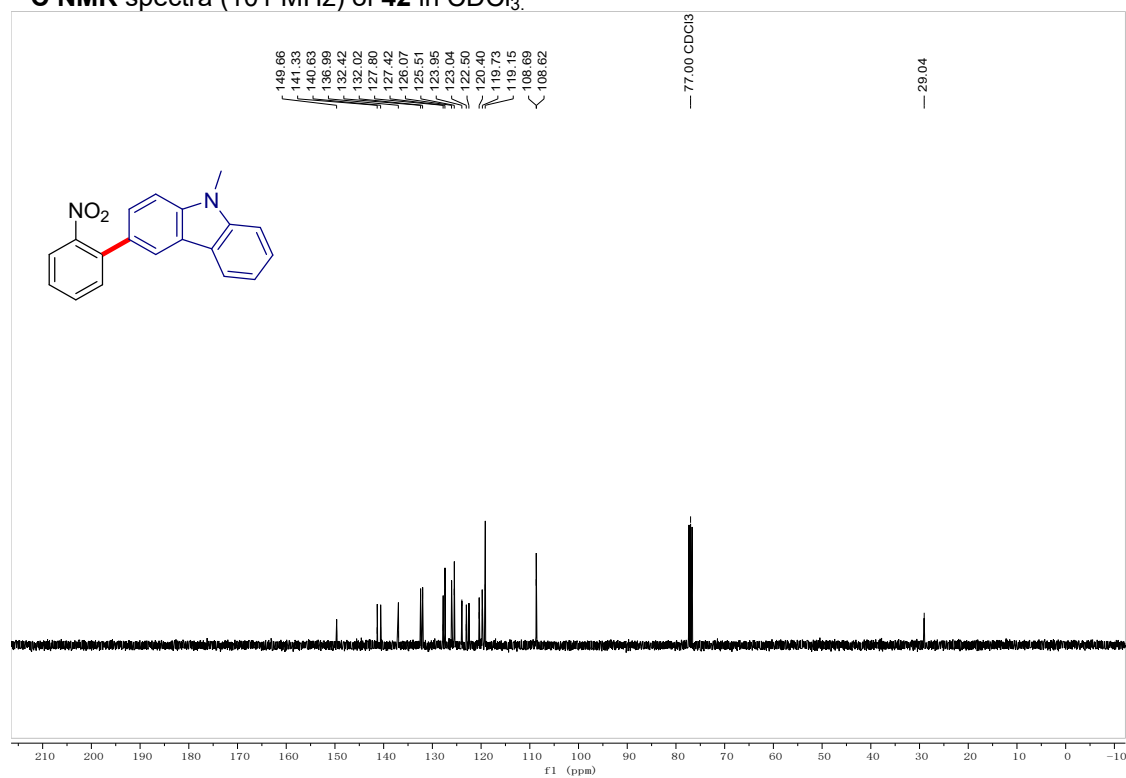

# SUPPORTING INFORMATION

<sup>1</sup>H NMR spectra (400 MHz) of **43** in CDCl<sub>3</sub>.

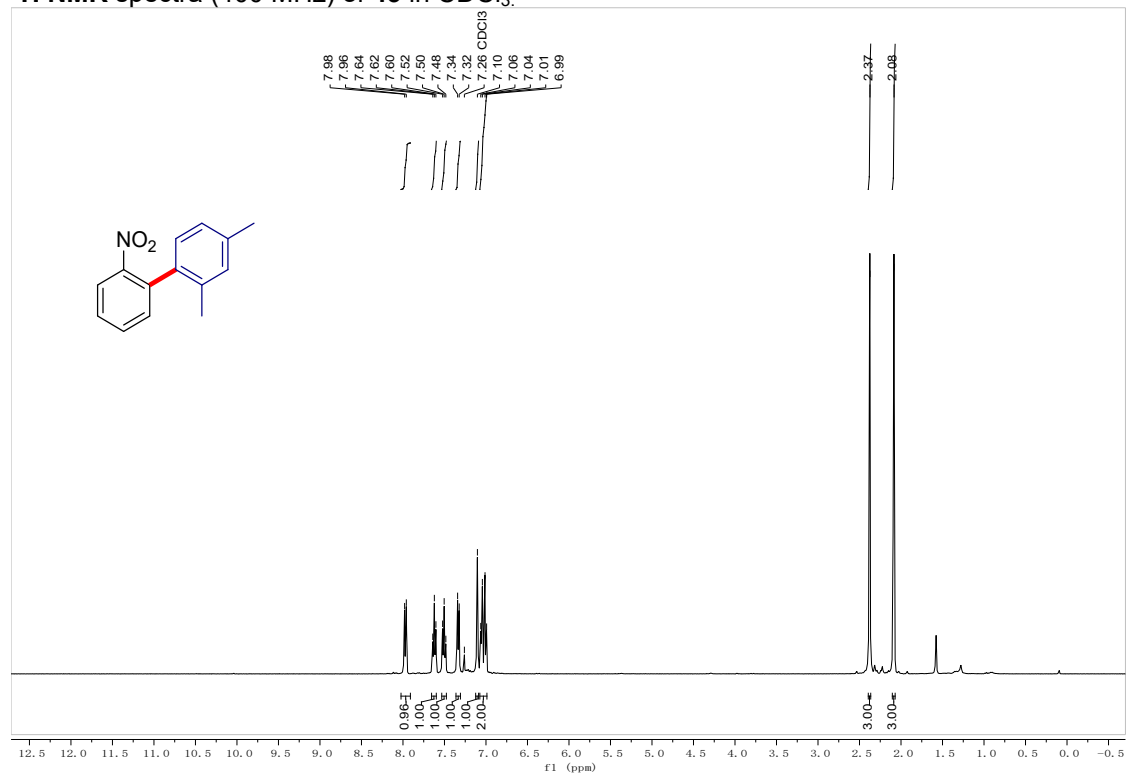

<sup>13</sup>C NMR spectra (101 MHz) of **43** in CDCl<sub>3</sub>.

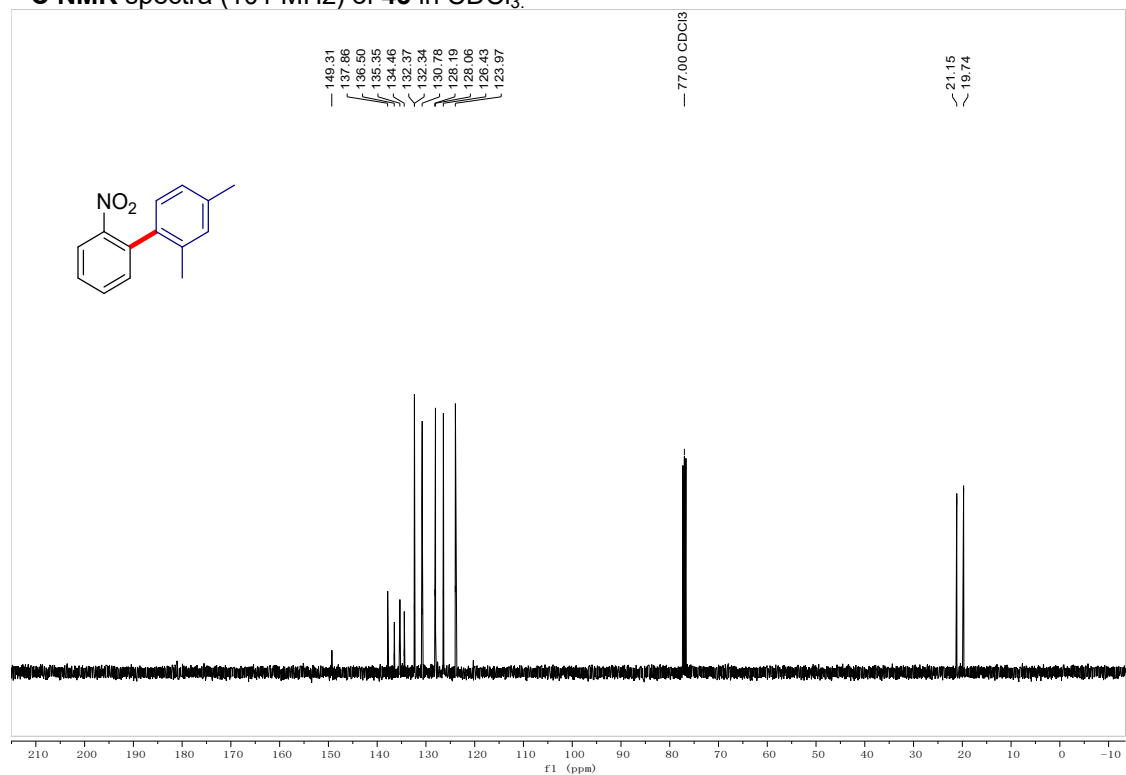

# SUPPORTING INFORMATION

<sup>1</sup>H NMR spectra (400 MHz) of **44** in CDCl<sub>3</sub>.

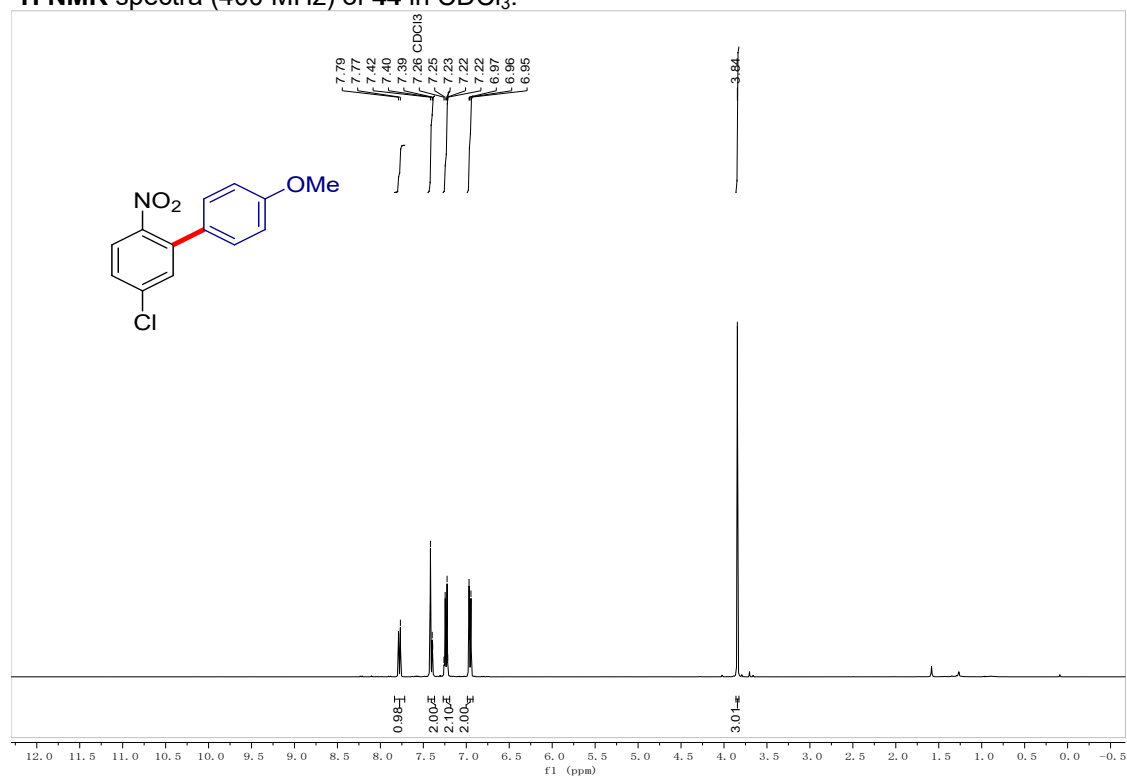

<sup>13</sup>C NMR spectra (101 MHz) of **44** in CDCl<sub>3</sub>.

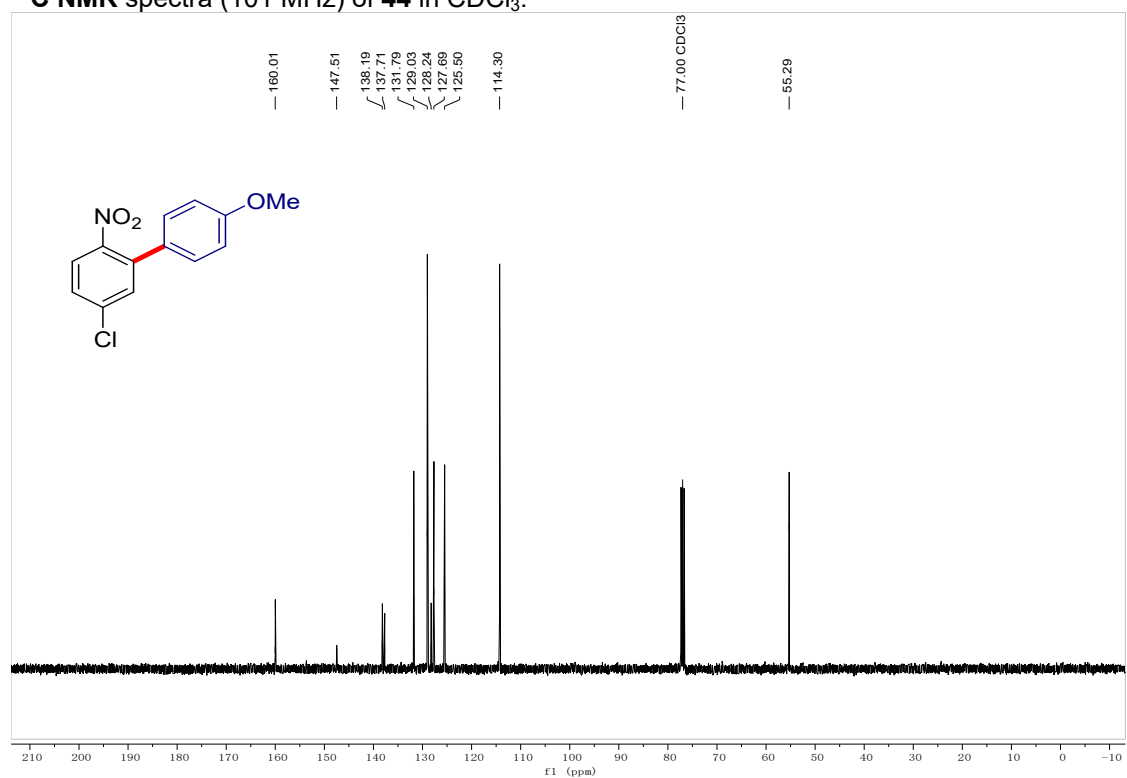

# SUPPORTING INFORMATION

<sup>1</sup>H NMR spectra (400 MHz) of **45** in CDCl<sub>3</sub>.

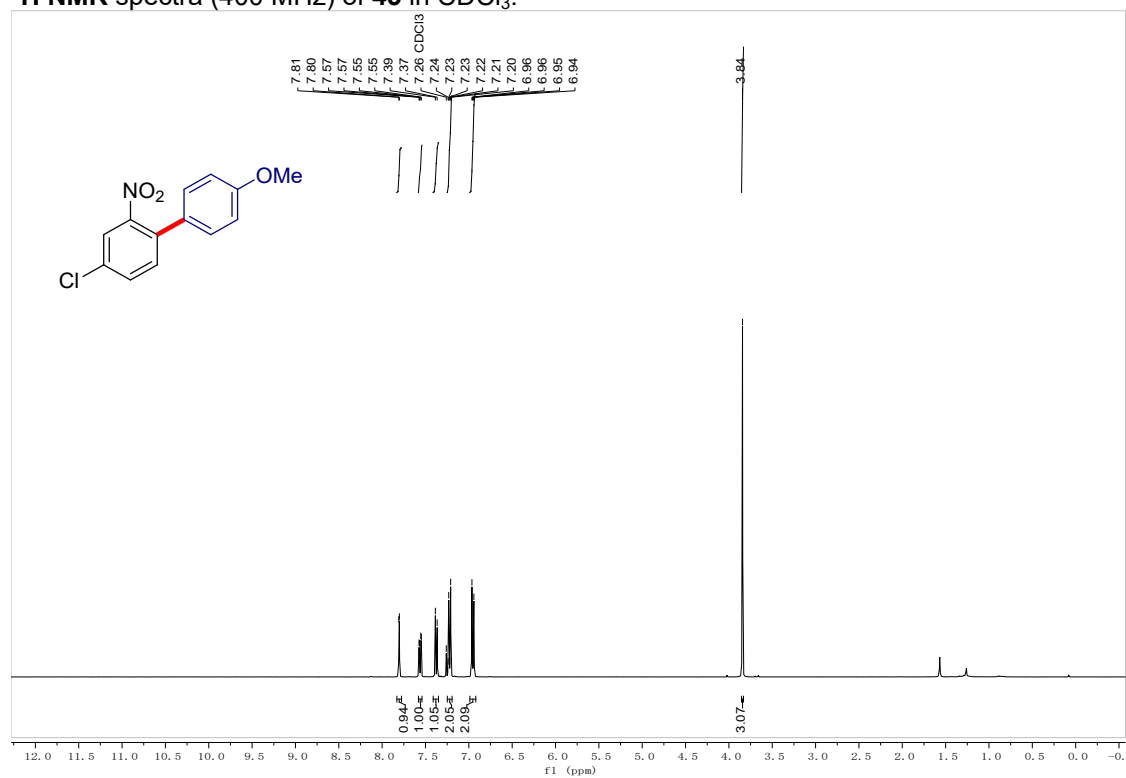

<sup>13</sup>C NMR spectra (101 MHz) of **45** in CDCl<sub>3</sub>.

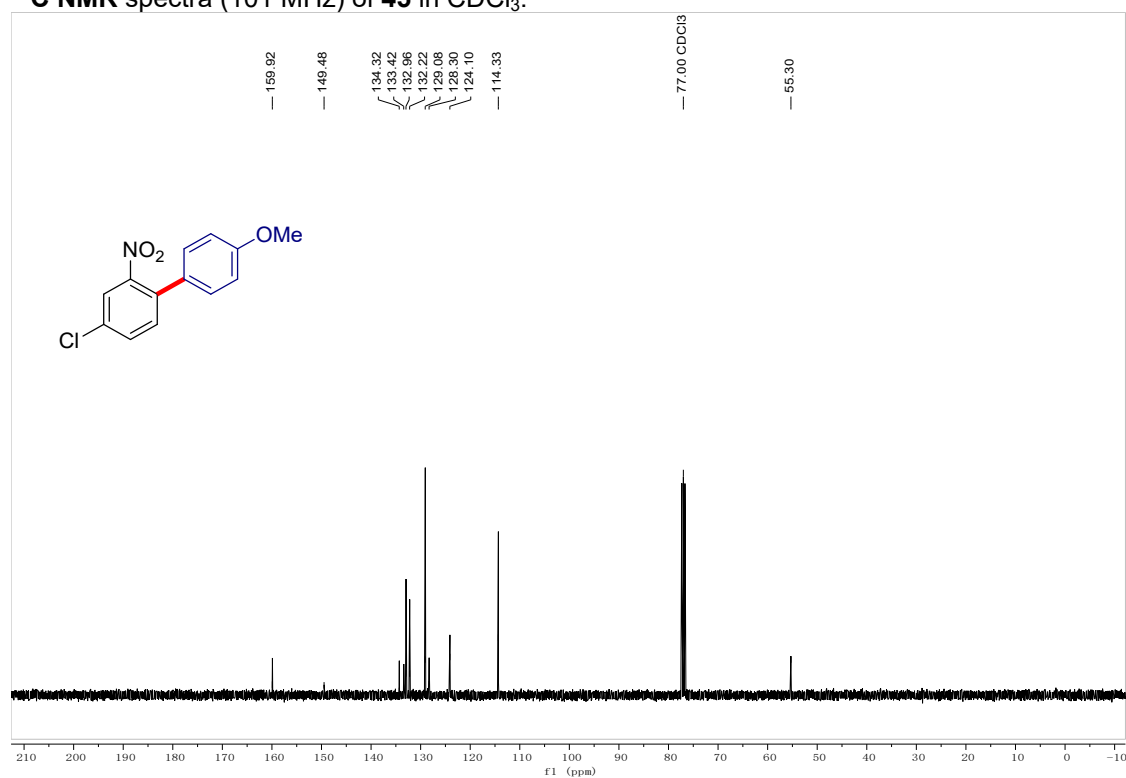

# SUPPORTING INFORMATION

$^1\text{H}$  NMR spectra (400 MHz) of **46** in  $\text{CDCl}_3$ .

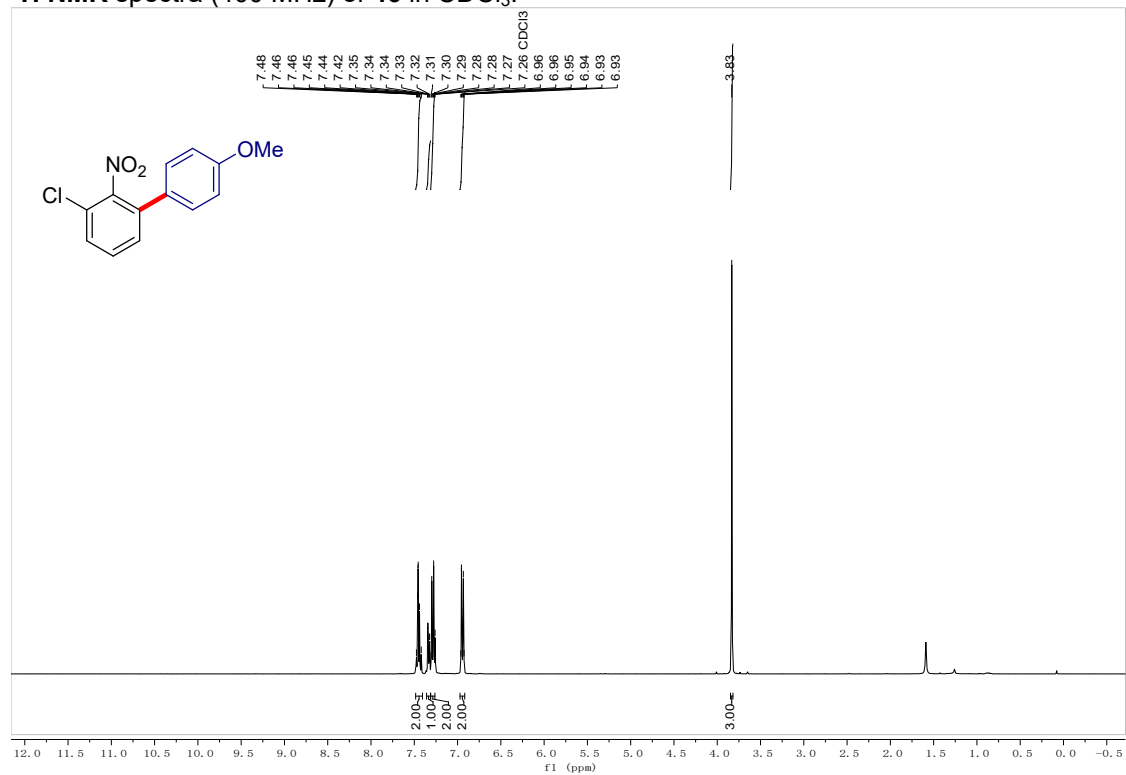

$^{13}\text{C}$  NMR spectra (101 MHz) of **46** in  $\text{CDCl}_3$ .

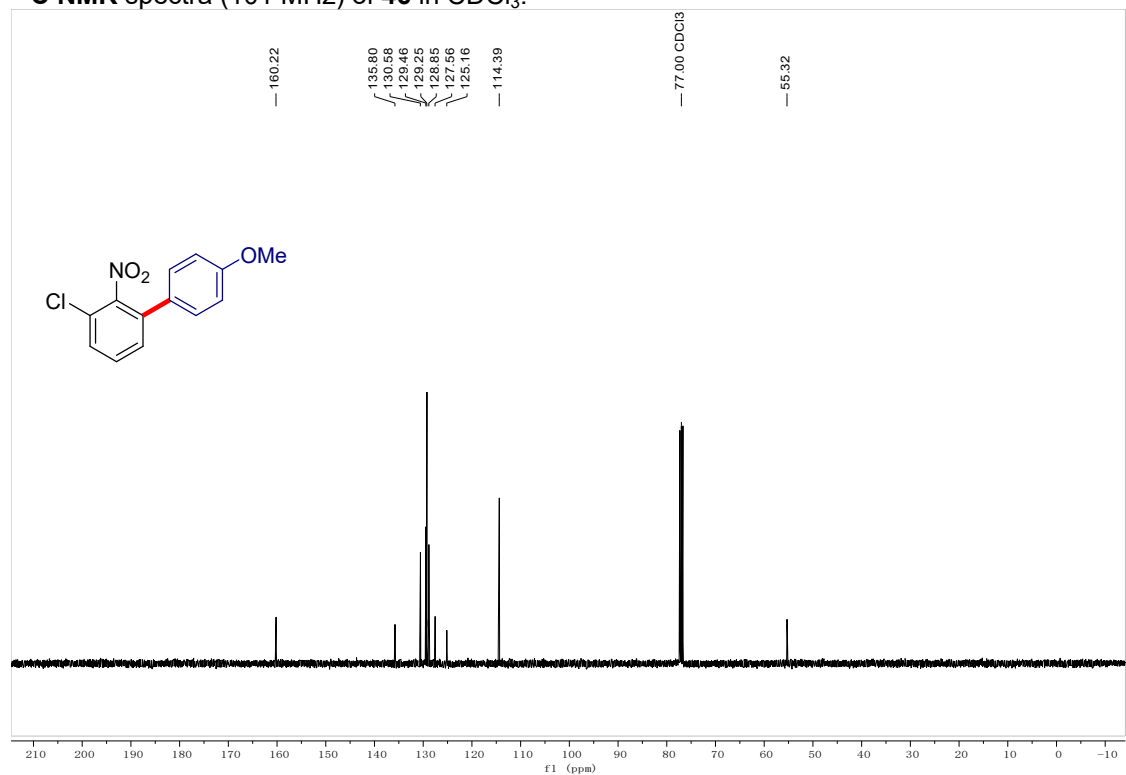

# SUPPORTING INFORMATION

$^1\text{H}$  NMR spectra (400 MHz) of **47** in  $\text{CDCl}_3$ .

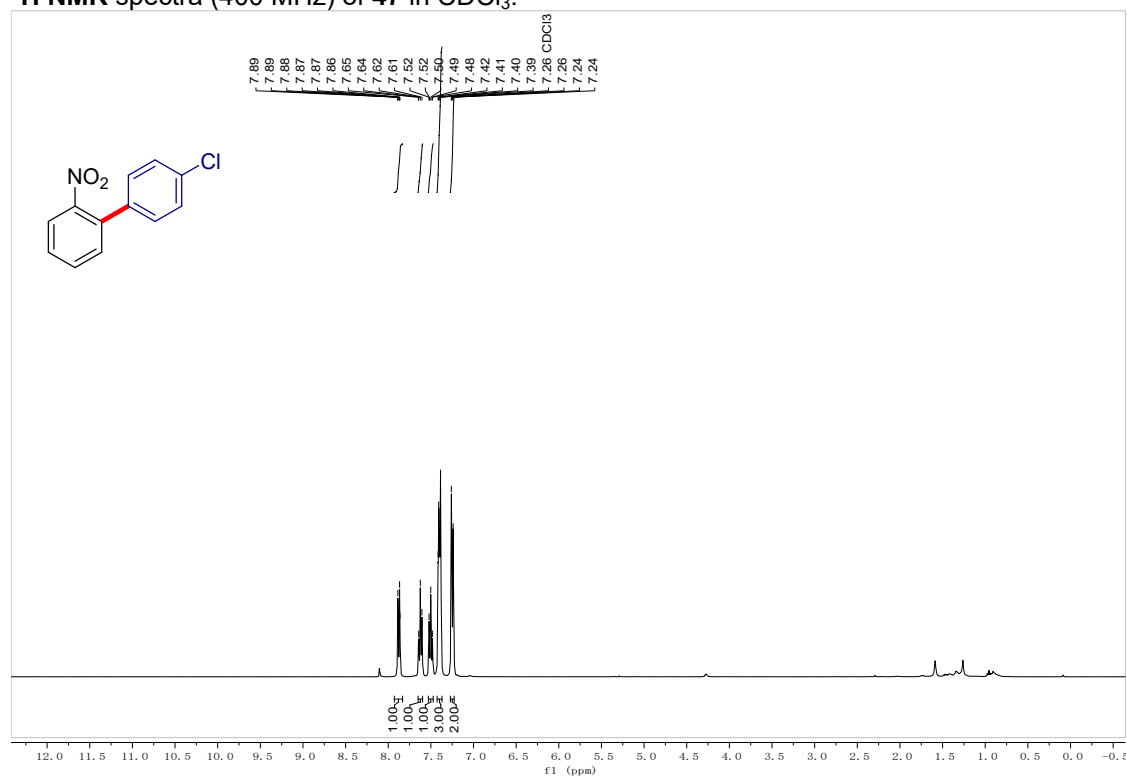

$^{13}\text{C}$  NMR spectra (101 MHz) of **47** in  $\text{CDCl}_3$ .

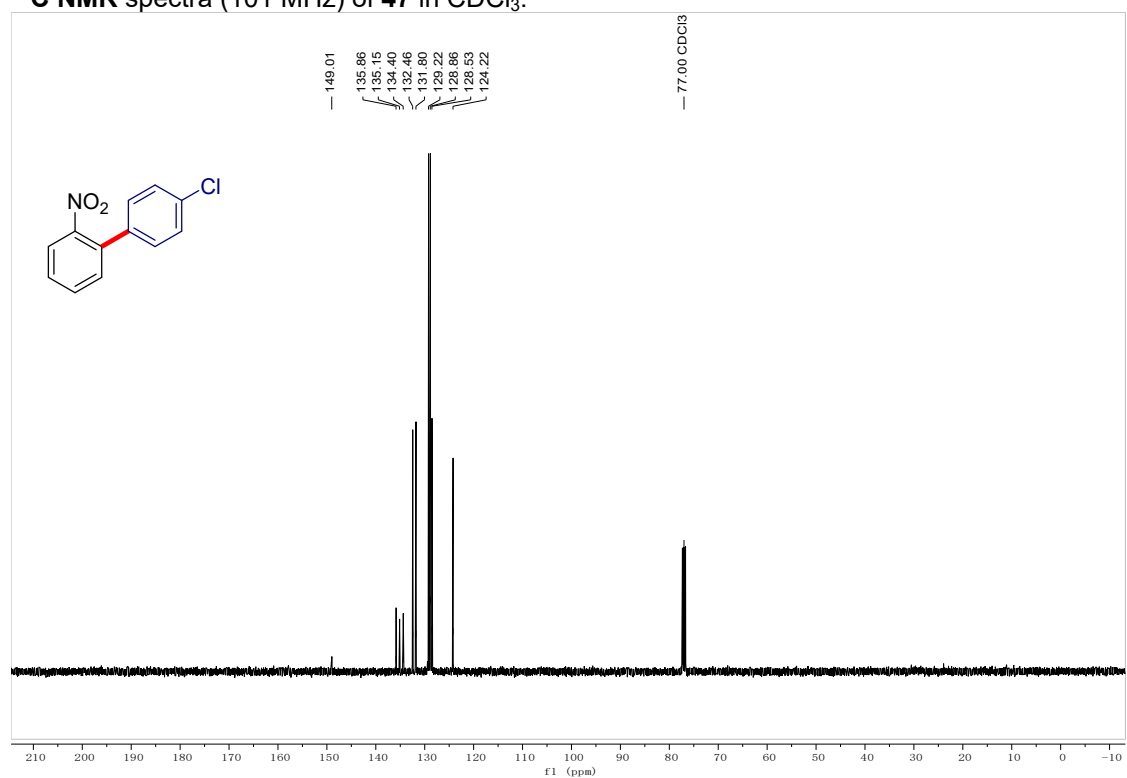

# SUPPORTING INFORMATION

<sup>1</sup>H NMR spectra (400 MHz) of **48** in CDCl<sub>3</sub>.

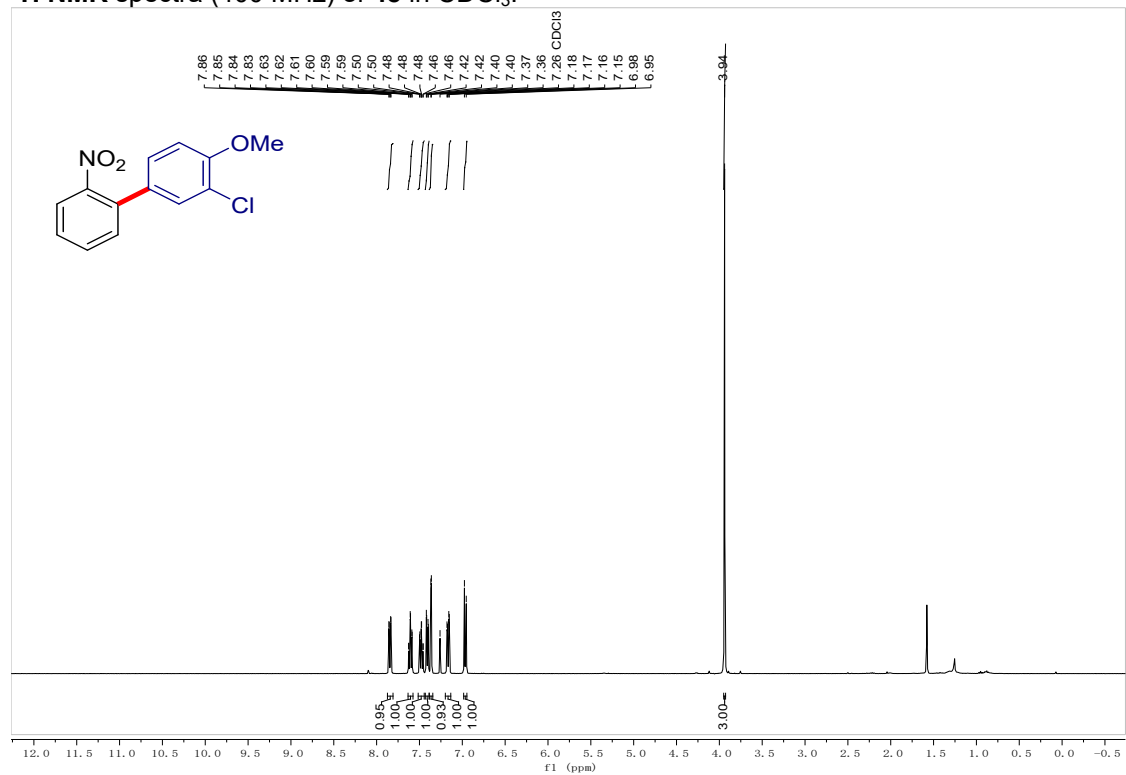

<sup>13</sup>C NMR spectra (101 MHz) of **48** in CDCl<sub>3</sub>.

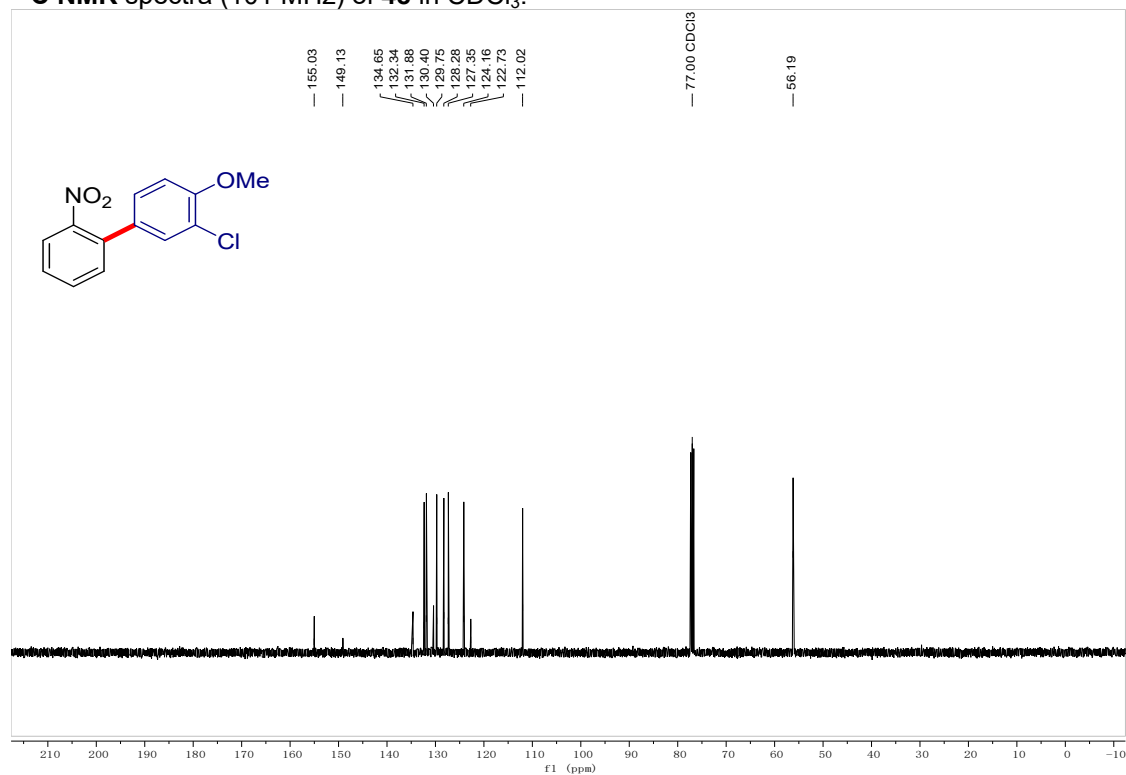

# SUPPORTING INFORMATION

$^1\text{H}$  NMR spectra (400 MHz) of **49** in  $\text{CDCl}_3$ .

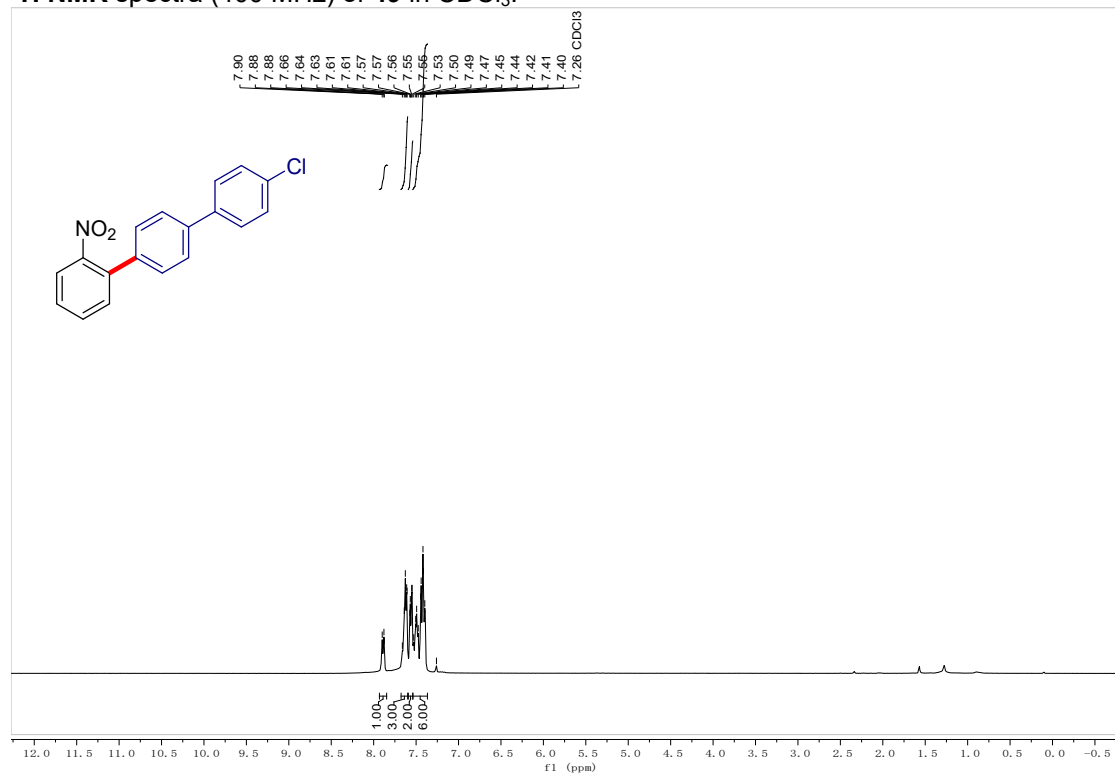

$^{13}\text{C}$  NMR spectra (101 MHz) of **49** in  $\text{CDCl}_3$ .

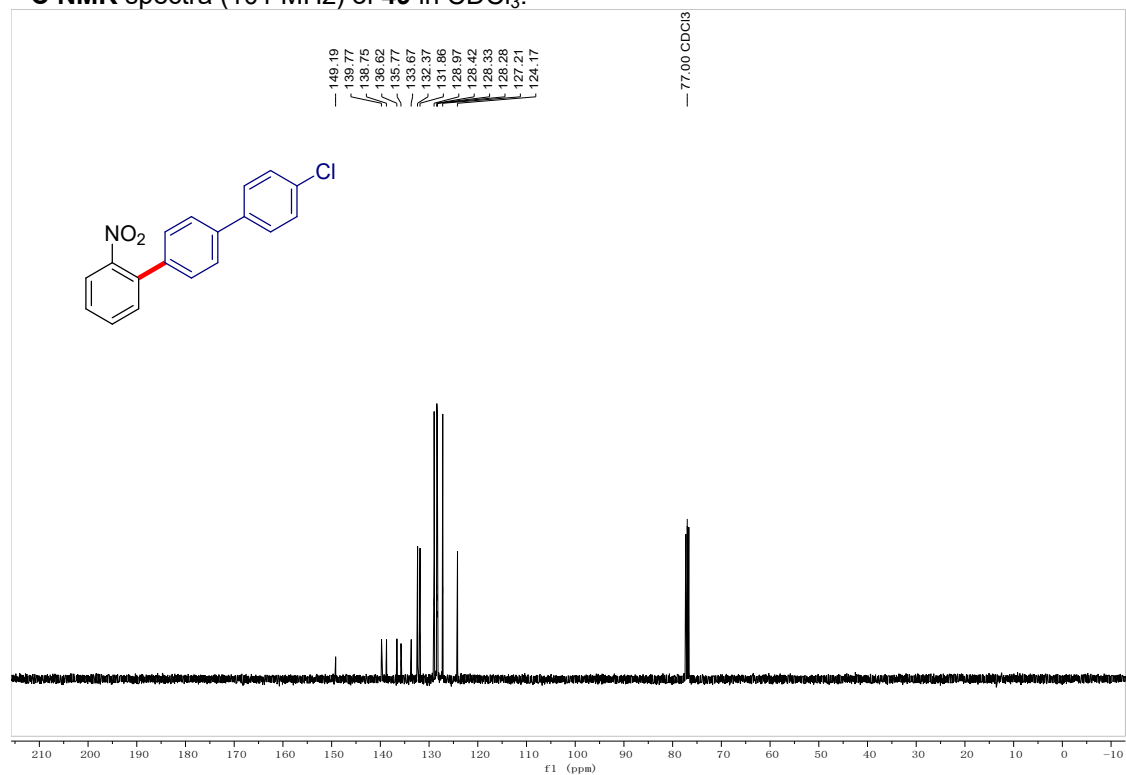

# SUPPORTING INFORMATION

$^1\text{H}$  NMR spectra (400 MHz) of **50** in  $\text{CDCl}_3$ .

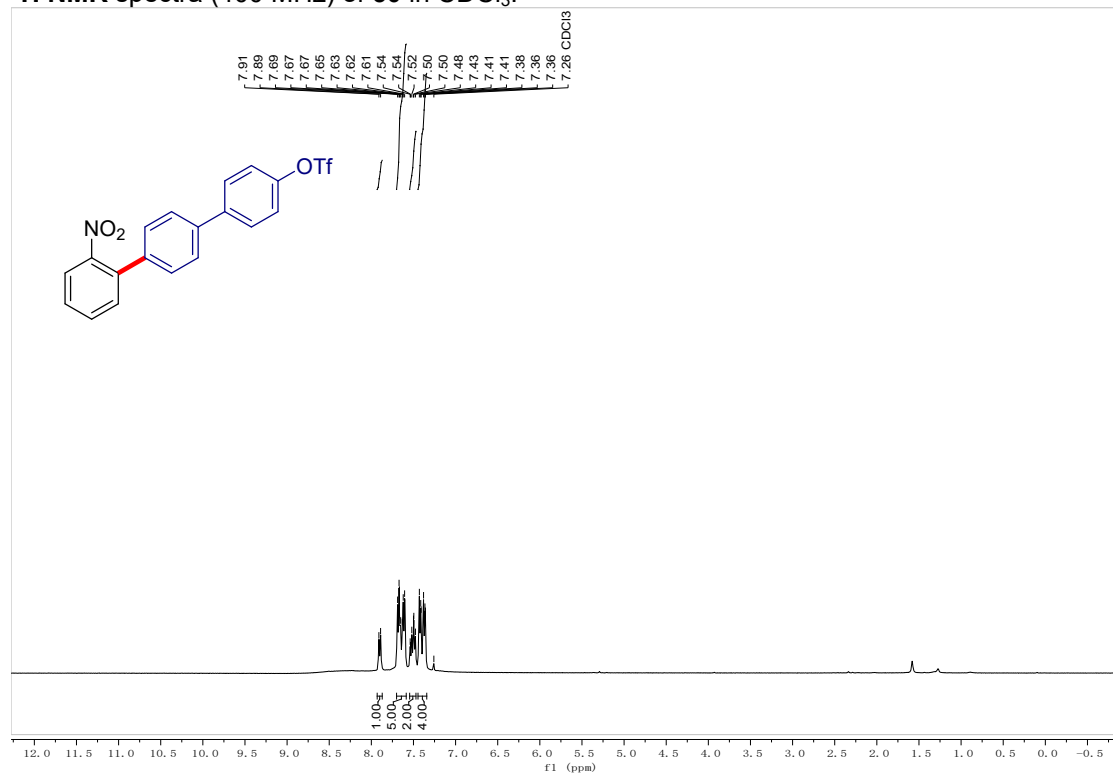

$^{13}\text{C}$  NMR spectra (101 MHz) of **50** in  $\text{CDCl}_3$ .

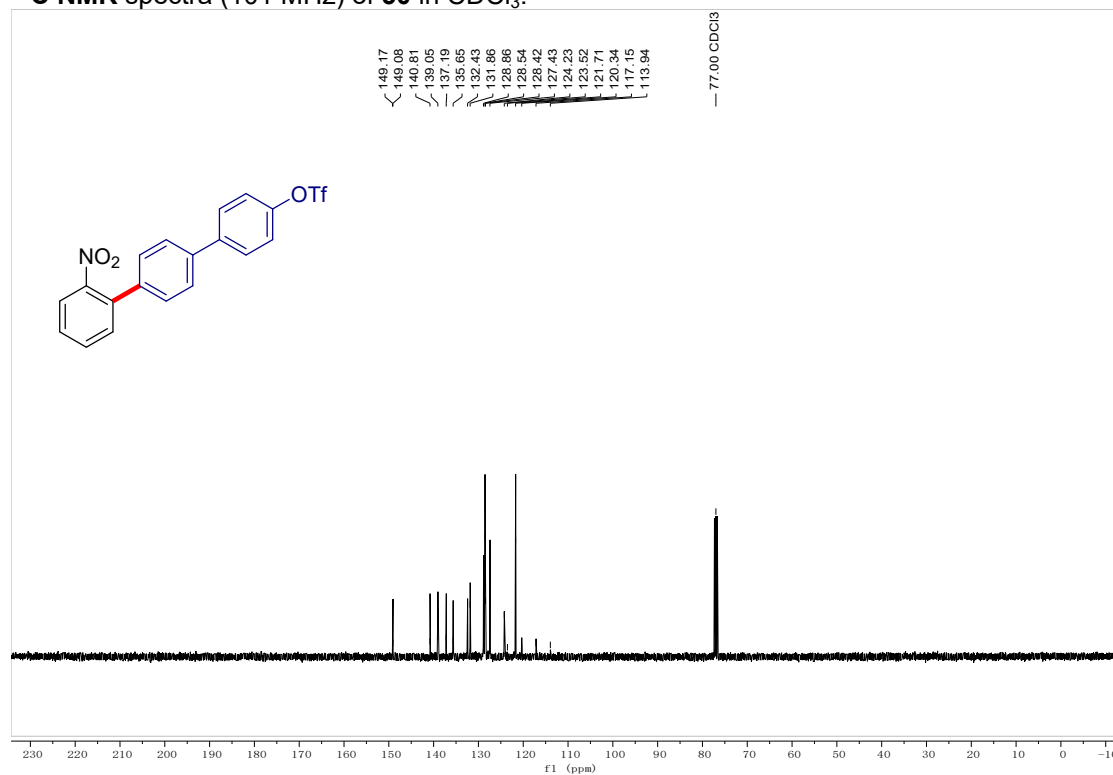

# SUPPORTING INFORMATION

<sup>1</sup>H NMR spectra (400 MHz) of **51** in CDCl<sub>3</sub>.

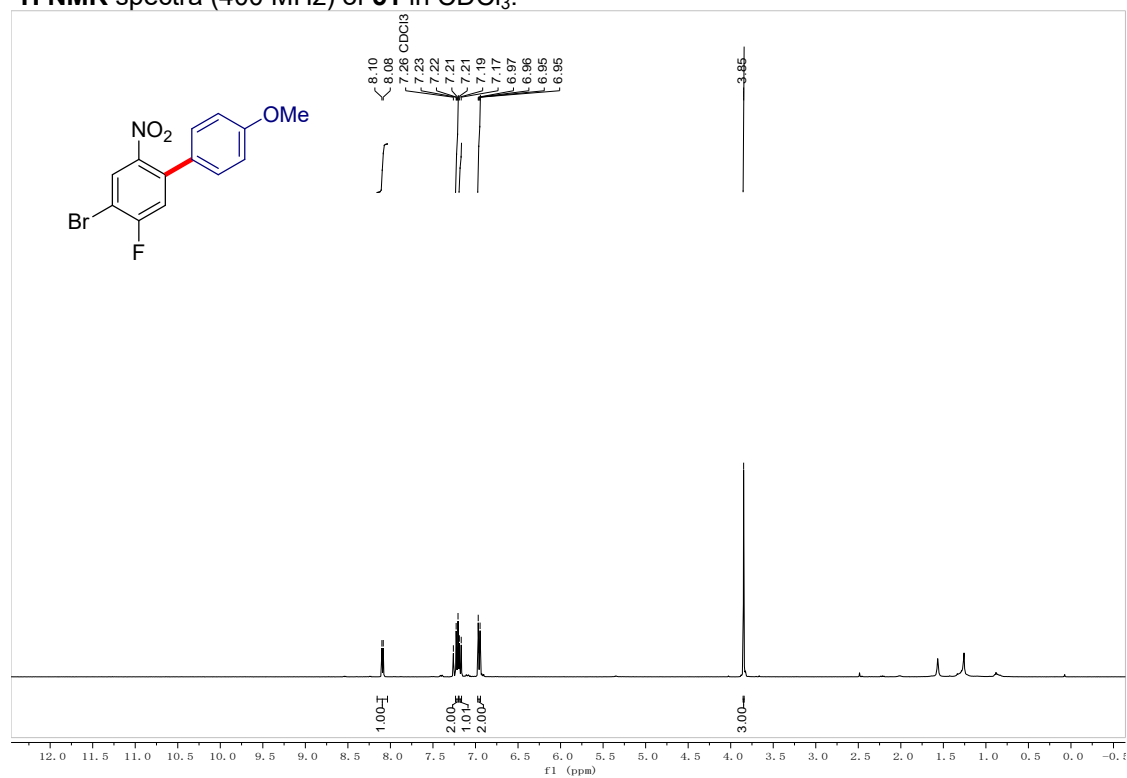

<sup>13</sup>C NMR spectra (101 MHz) of **51** in CDCl<sub>3</sub>.

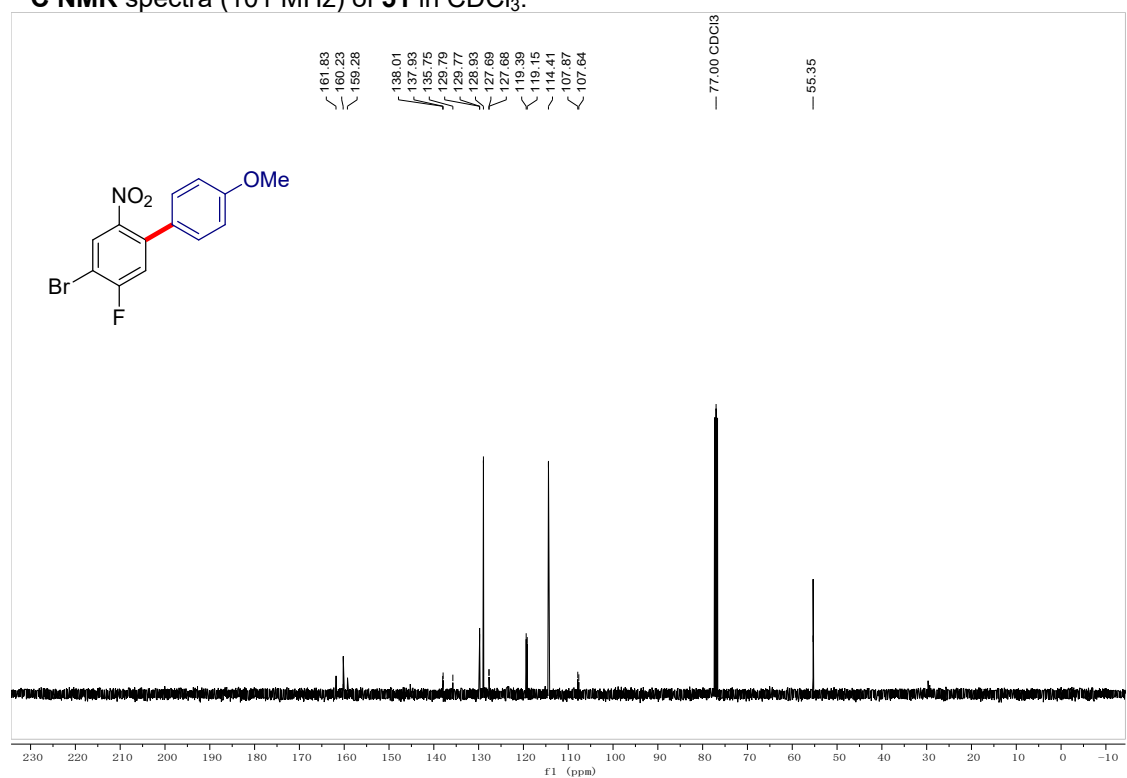

## SUPPORTING INFORMATION

$^{19}\text{F}$  NMR spectra (377 MHz) of **51** in  $\text{CDCl}_3$ .

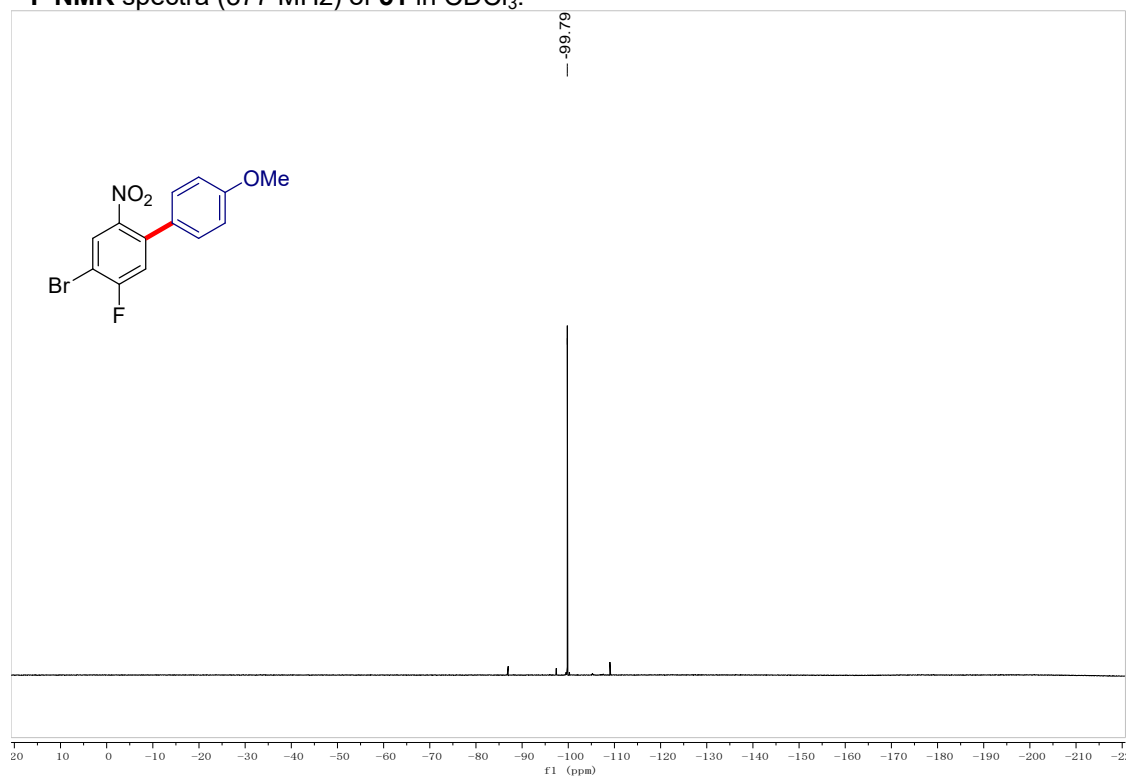

# SUPPORTING INFORMATION

$^1\text{H}$  NMR spectra (400 MHz) of **52** in  $\text{CDCl}_3$ .

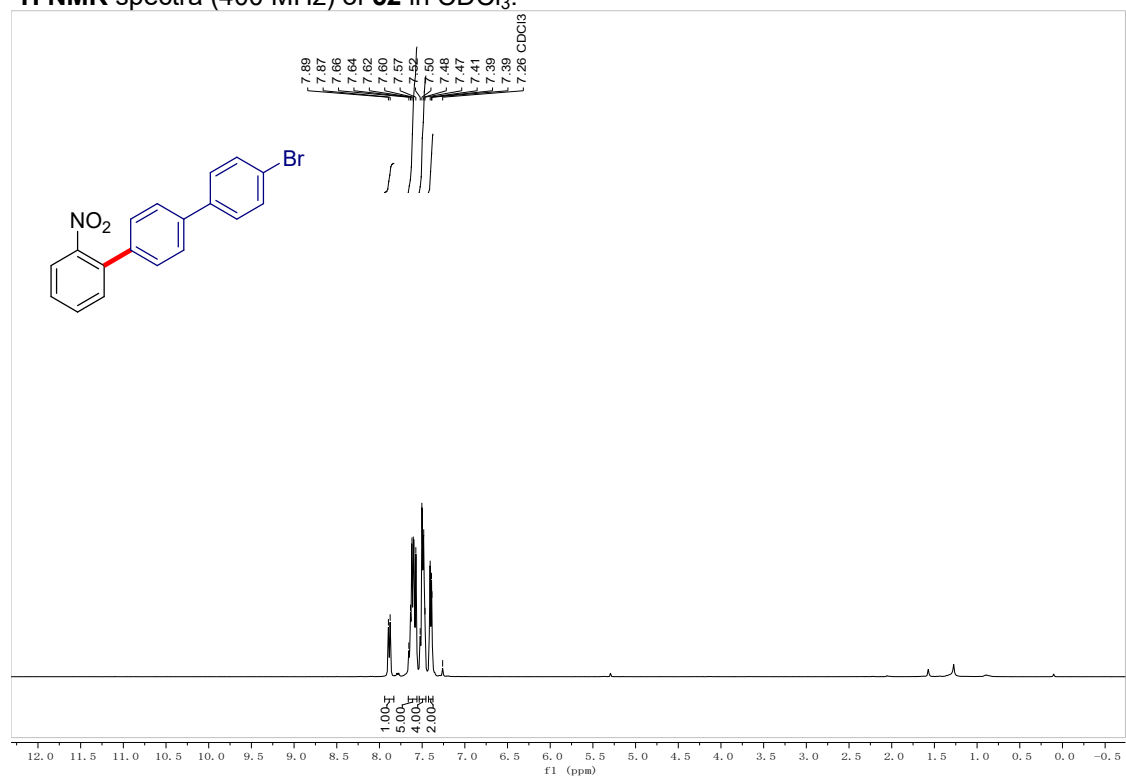

$^{13}\text{C}$  NMR spectra (101 MHz) of **52** in  $\text{CDCl}_3$ .

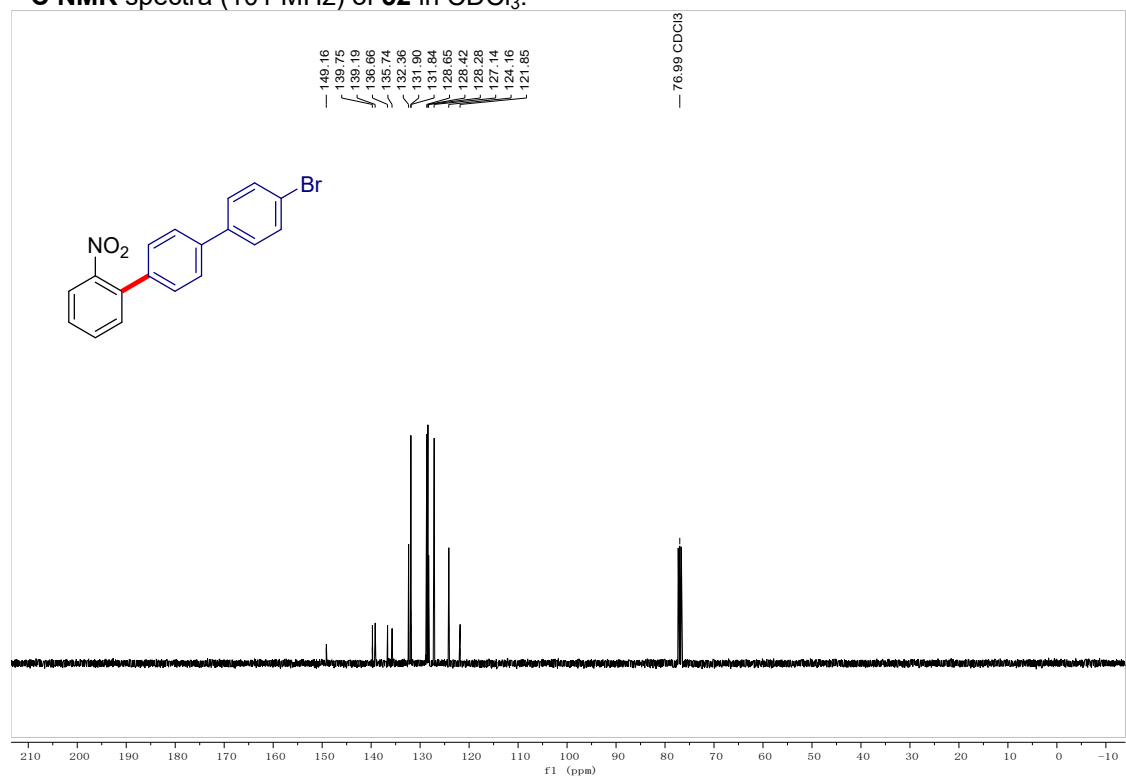

# SUPPORTING INFORMATION

$^1\text{H}$  NMR spectra (400 MHz) of **53** in  $\text{CDCl}_3$ .

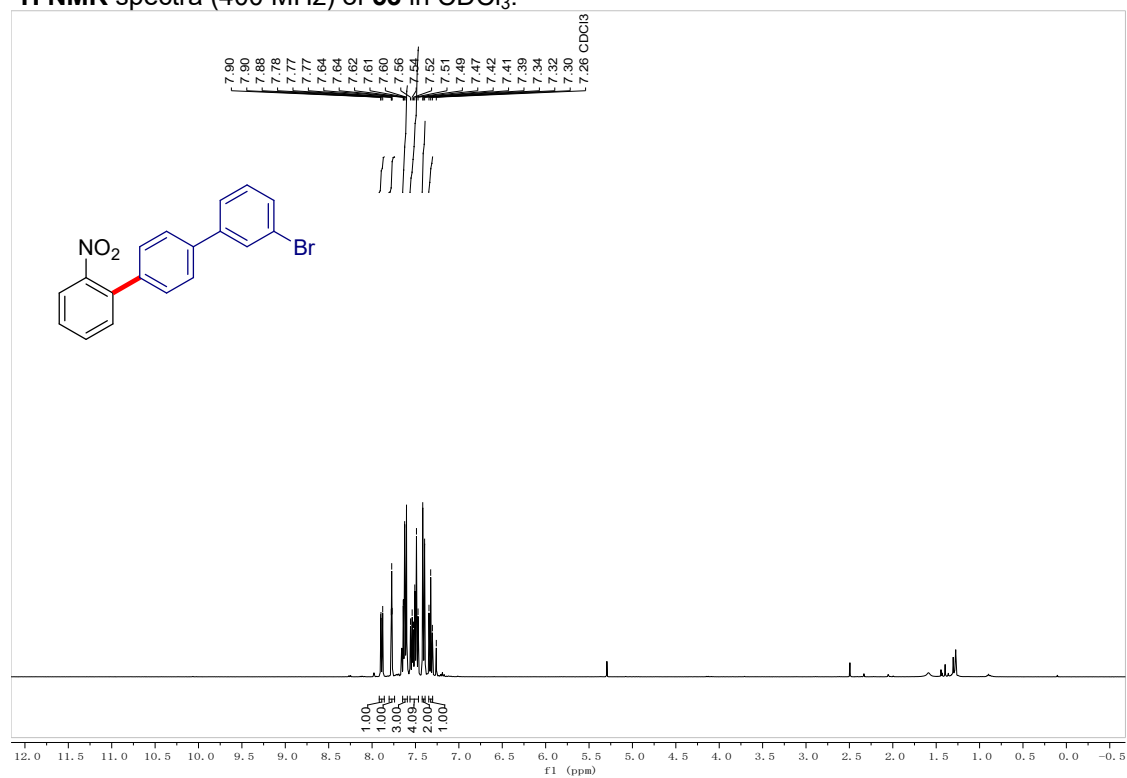

$^{13}\text{C}$  NMR spectra (101 MHz) of **53** in  $\text{CDCl}_3$ .

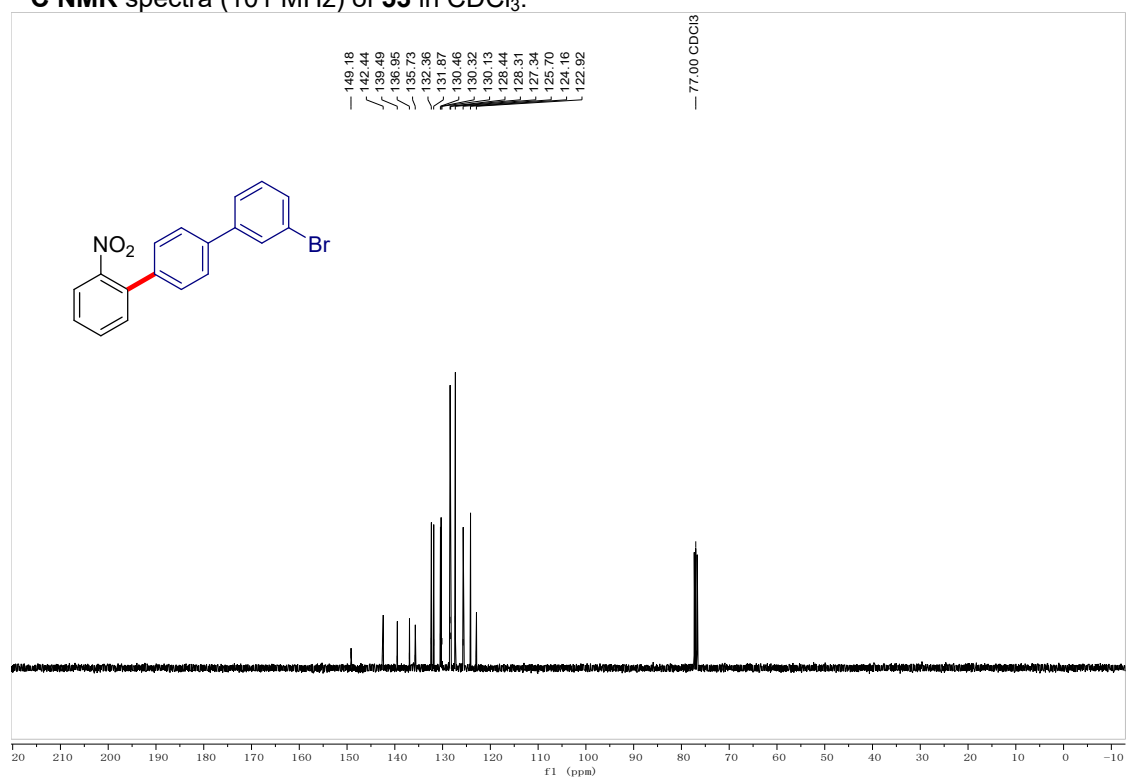

# SUPPORTING INFORMATION

$^1\text{H}$  NMR spectra (400 MHz) of **54** in  $\text{CDCl}_3$ .

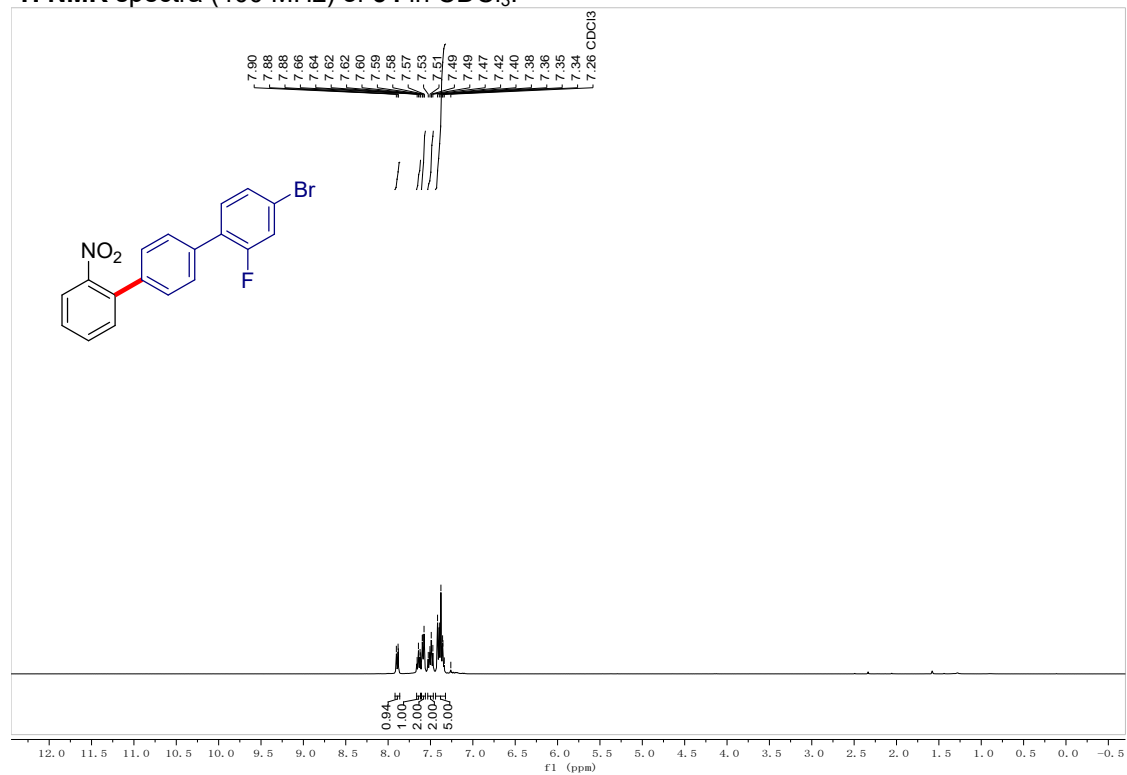

$^{13}\text{C}$  NMR spectra (101 MHz) of **54** in  $\text{CDCl}_3$ .

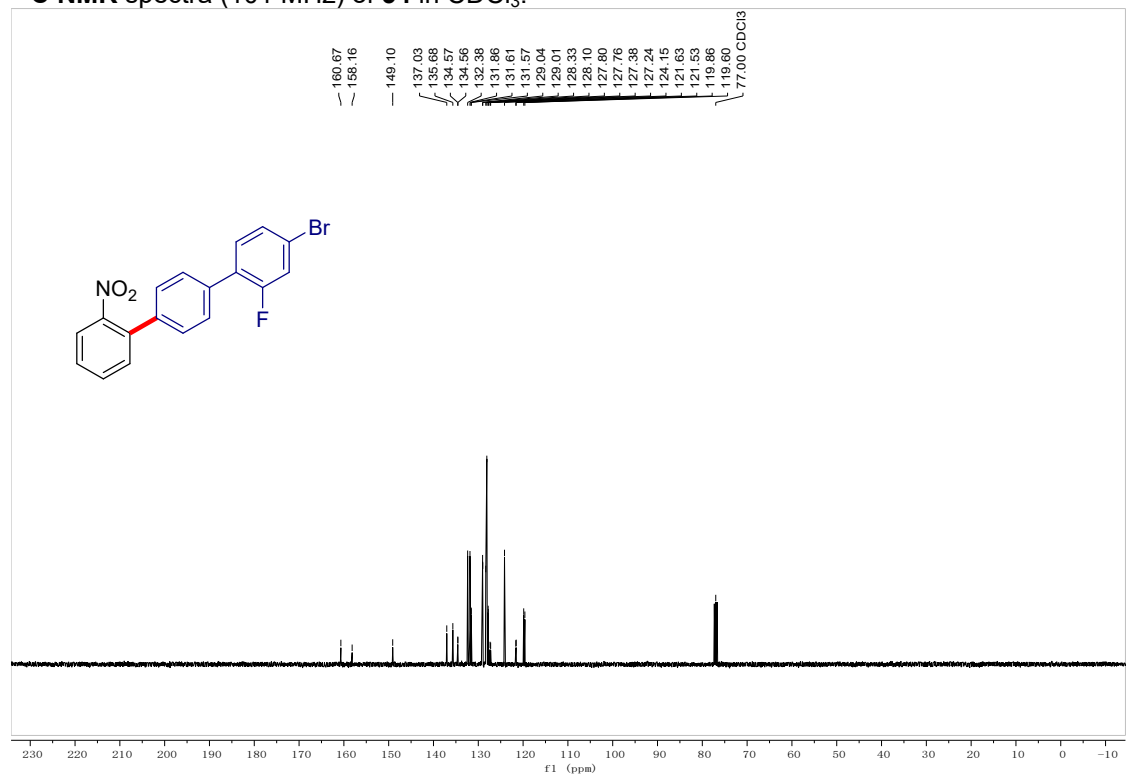

## SUPPORTING INFORMATION

$^{19}\text{F}$  NMR spectra (377MHz) of **54** in  $\text{CDCl}_3$ .

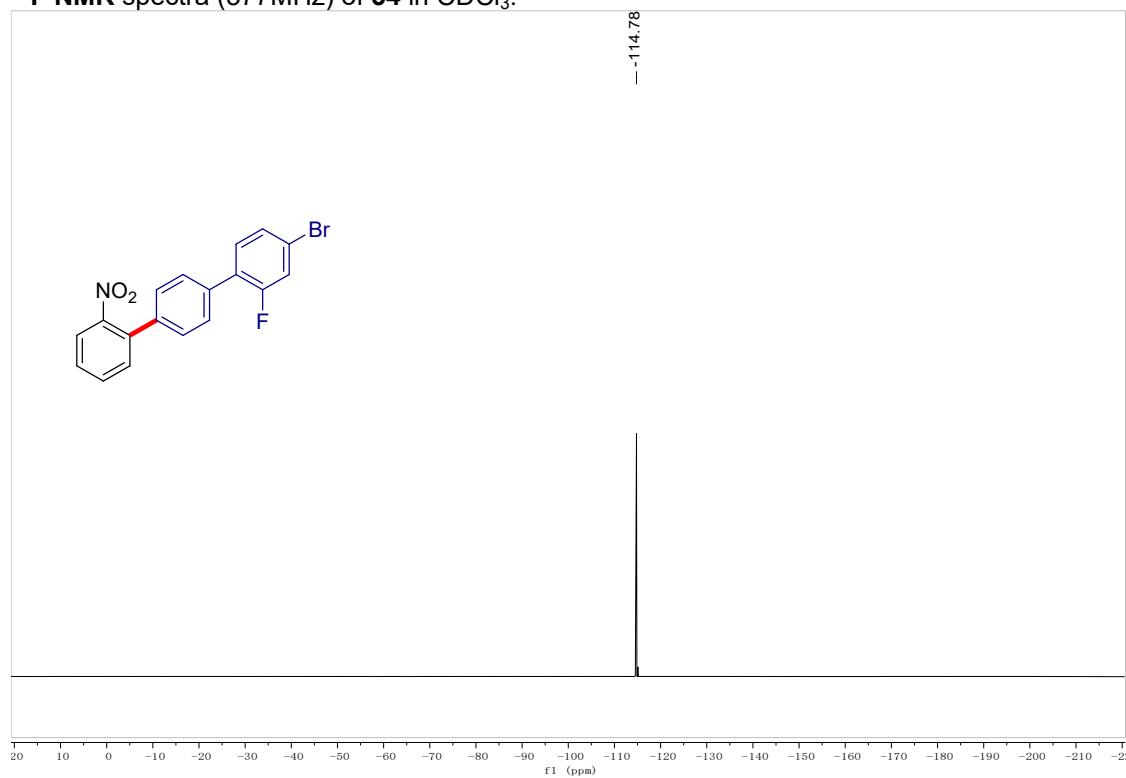

# SUPPORTING INFORMATION

$^1\text{H}$  NMR spectra (400 MHz) of **55** in  $\text{CDCl}_3$ .

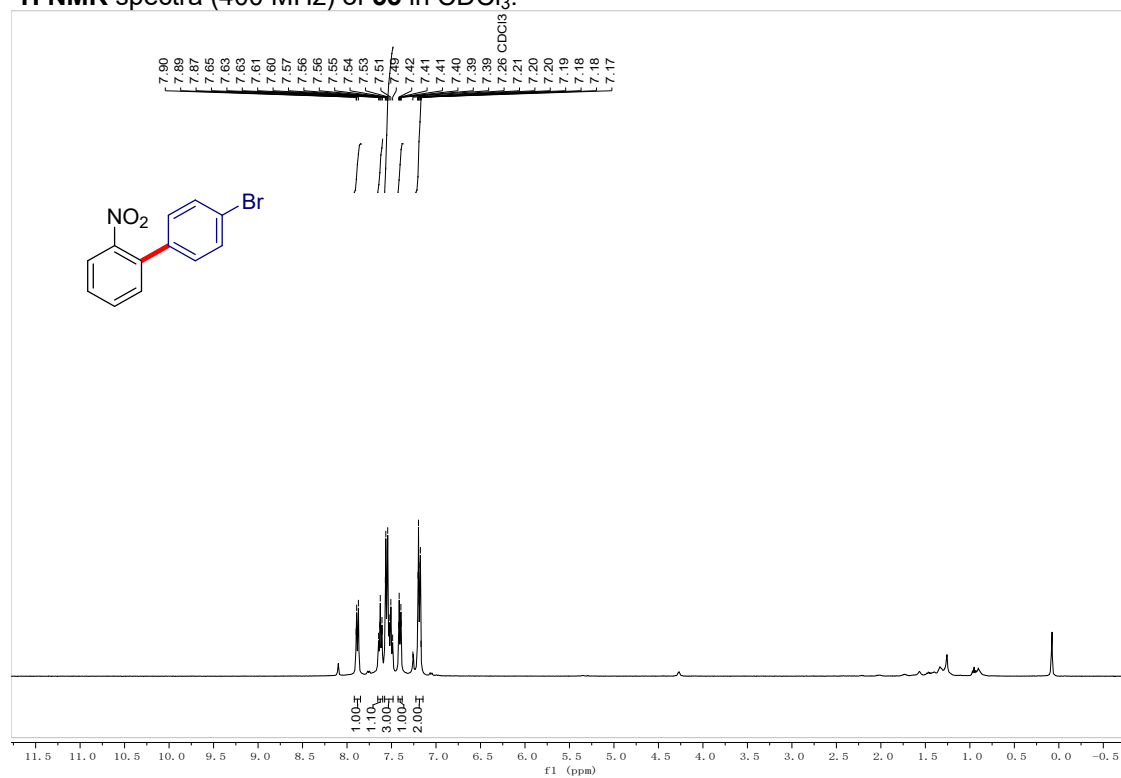

$^{13}\text{C}$  NMR spectra (101 MHz) of **55** in  $\text{CDCl}_3$ .

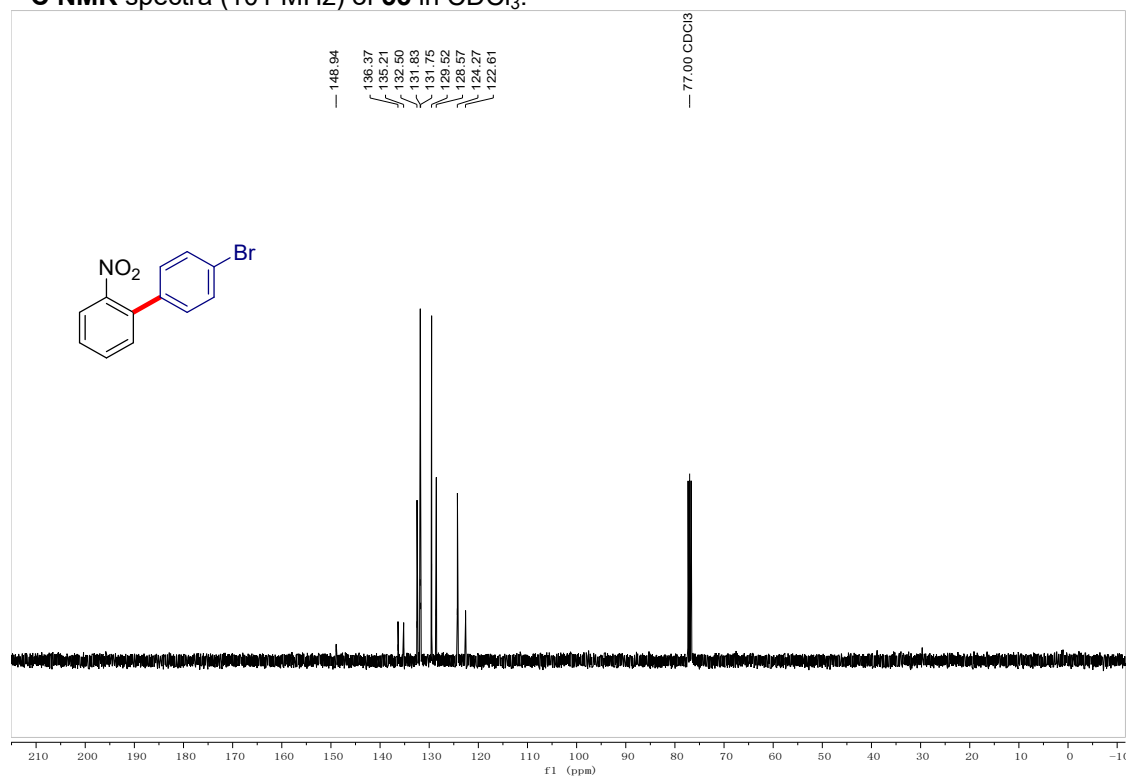

# SUPPORTING INFORMATION

<sup>1</sup>H NMR spectra (400 MHz) of **56** in CDCl<sub>3</sub>.

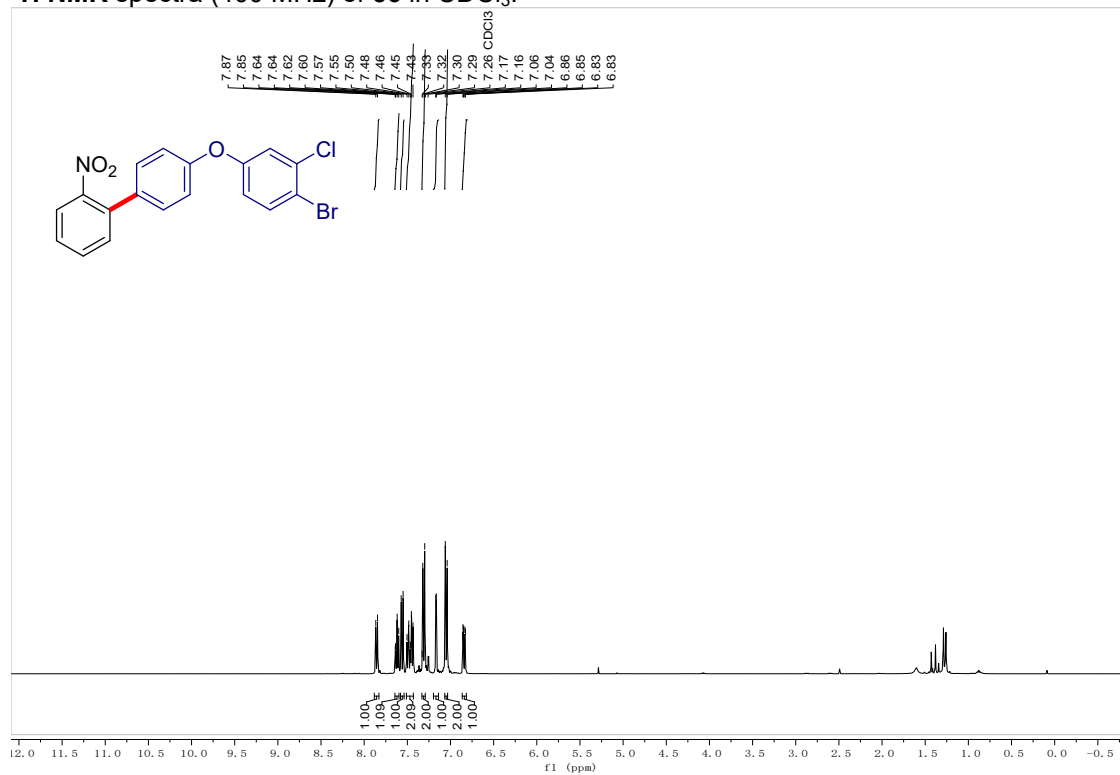

<sup>13</sup>C NMR spectra (101 MHz) of **56** in CDCl<sub>3</sub>.

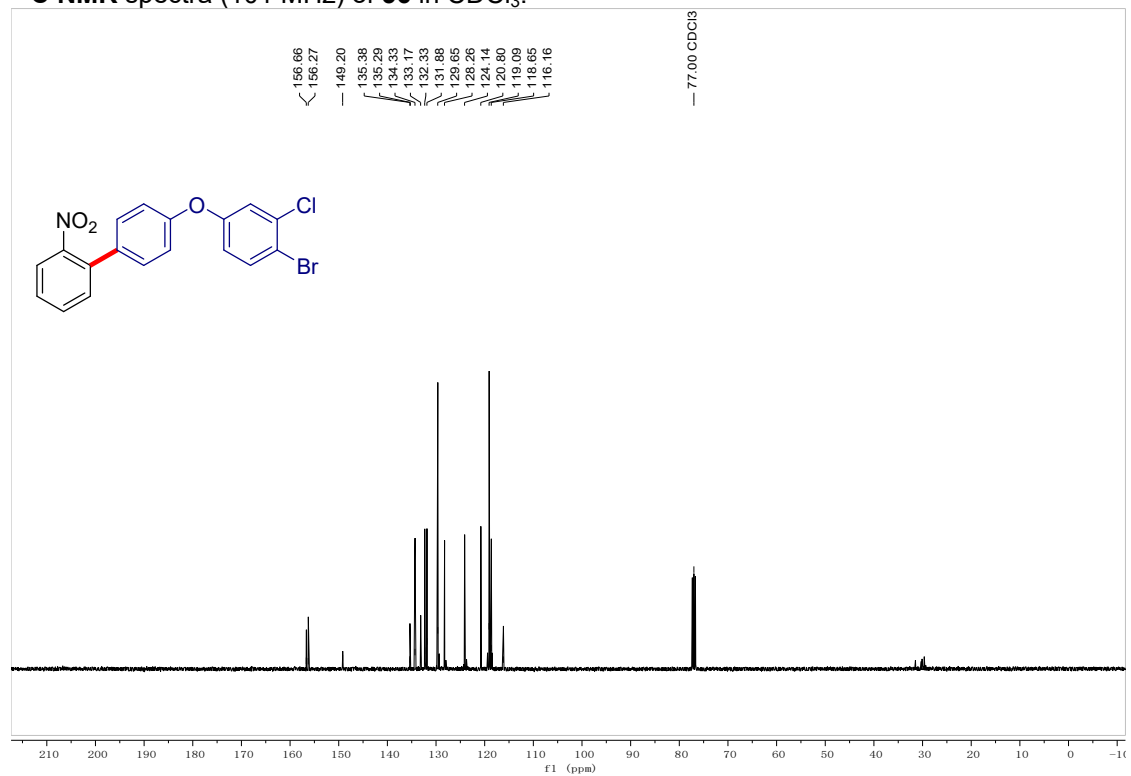

# SUPPORTING INFORMATION

$^1\text{H}$  NMR spectra (400 MHz) of **57** in  $\text{CDCl}_3$ .

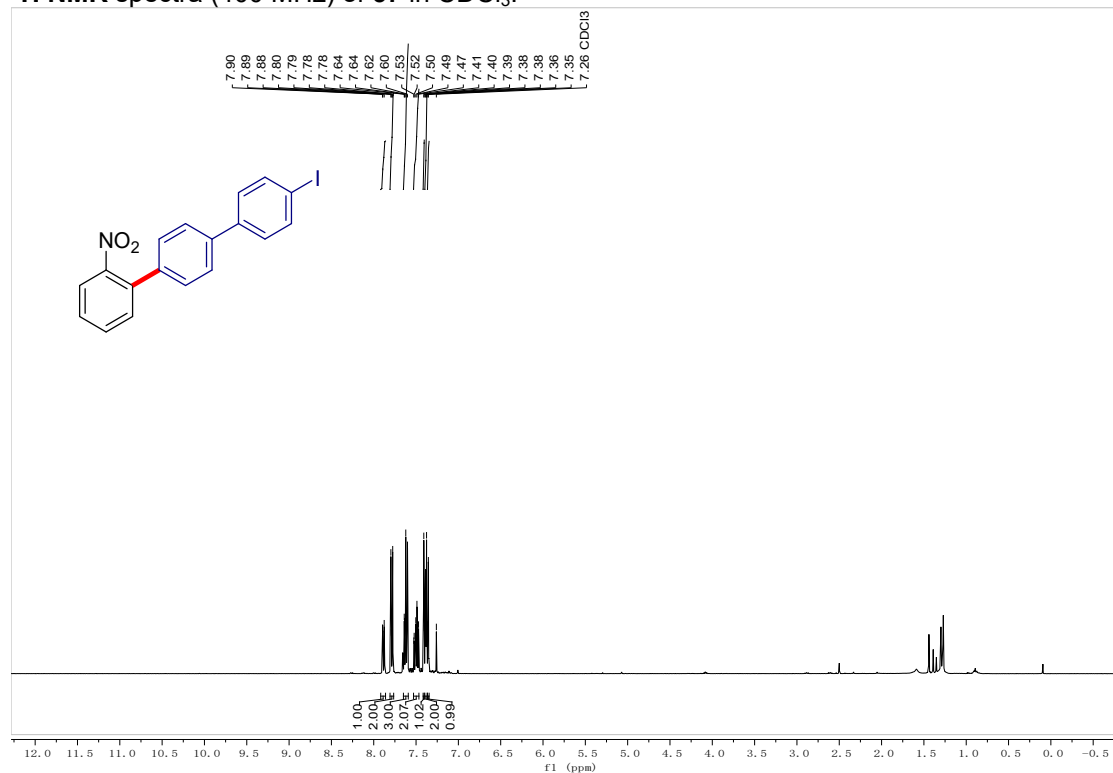

$^{13}\text{C}$  NMR spectra (101 MHz) of **57** in  $\text{CDCl}_3$ .

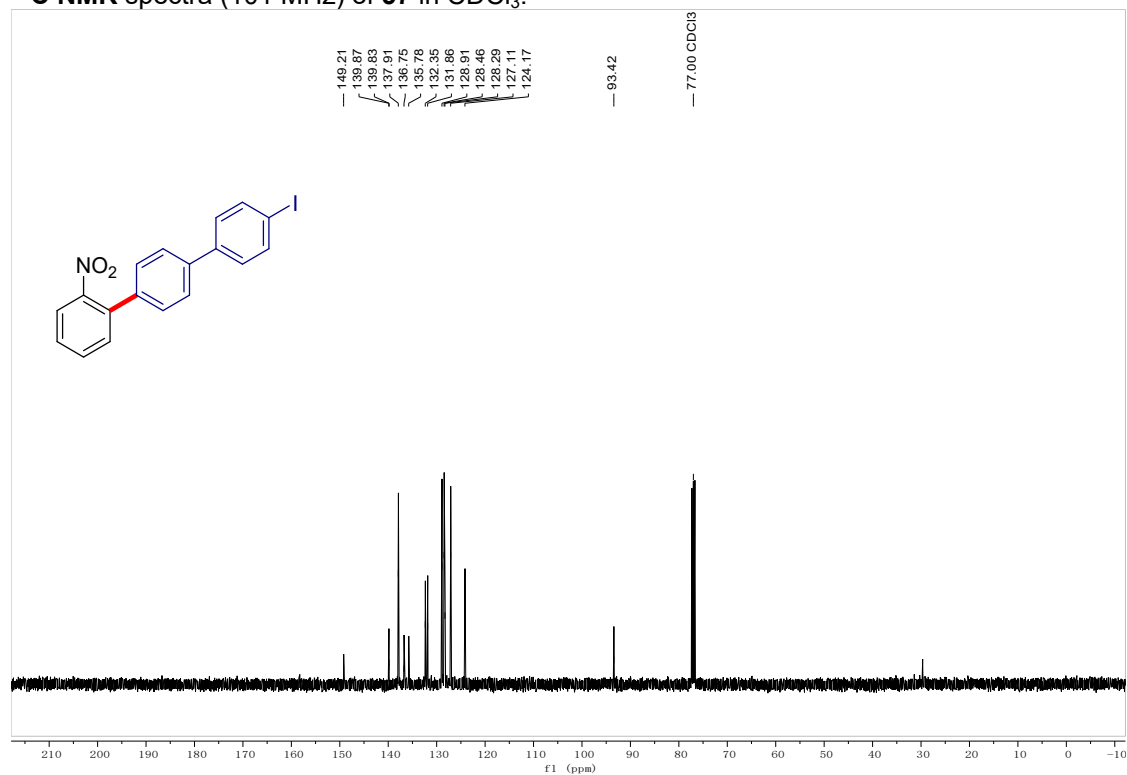

# SUPPORTING INFORMATION

$^1\text{H}$  NMR spectra (400 MHz) of **58** in  $\text{CDCl}_3$ .

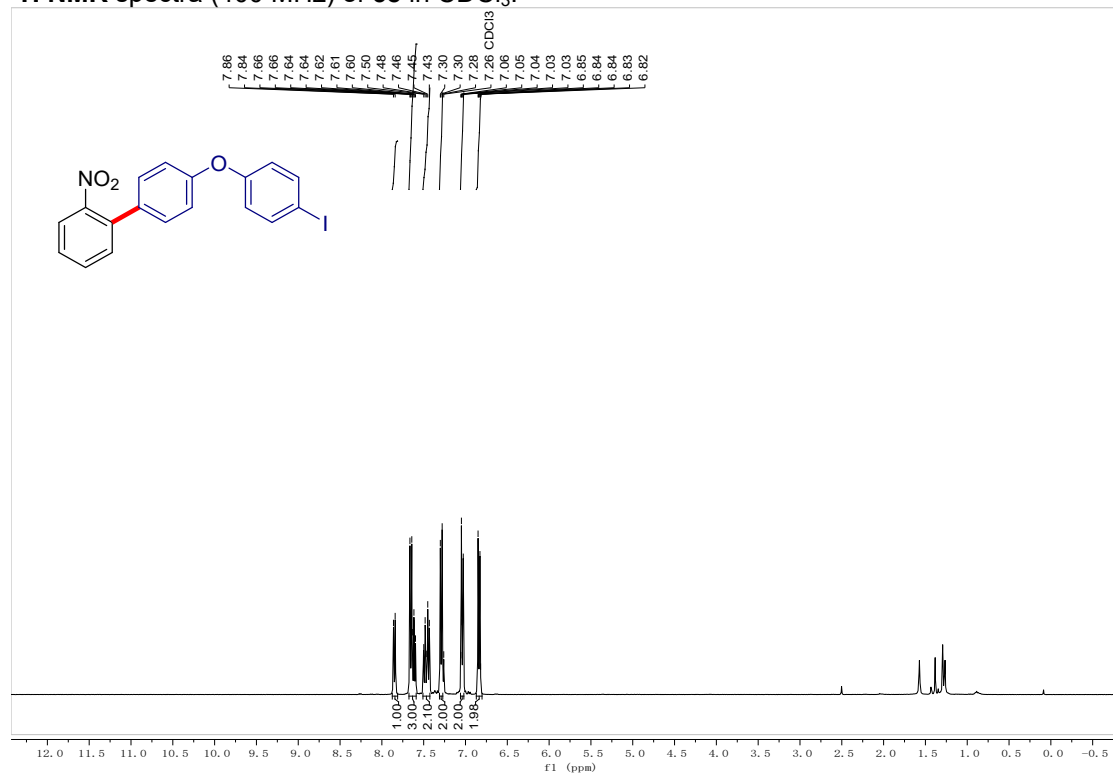

$^{13}\text{C}$  NMR spectra (101 MHz) of **58** in  $\text{CDCl}_3$ .

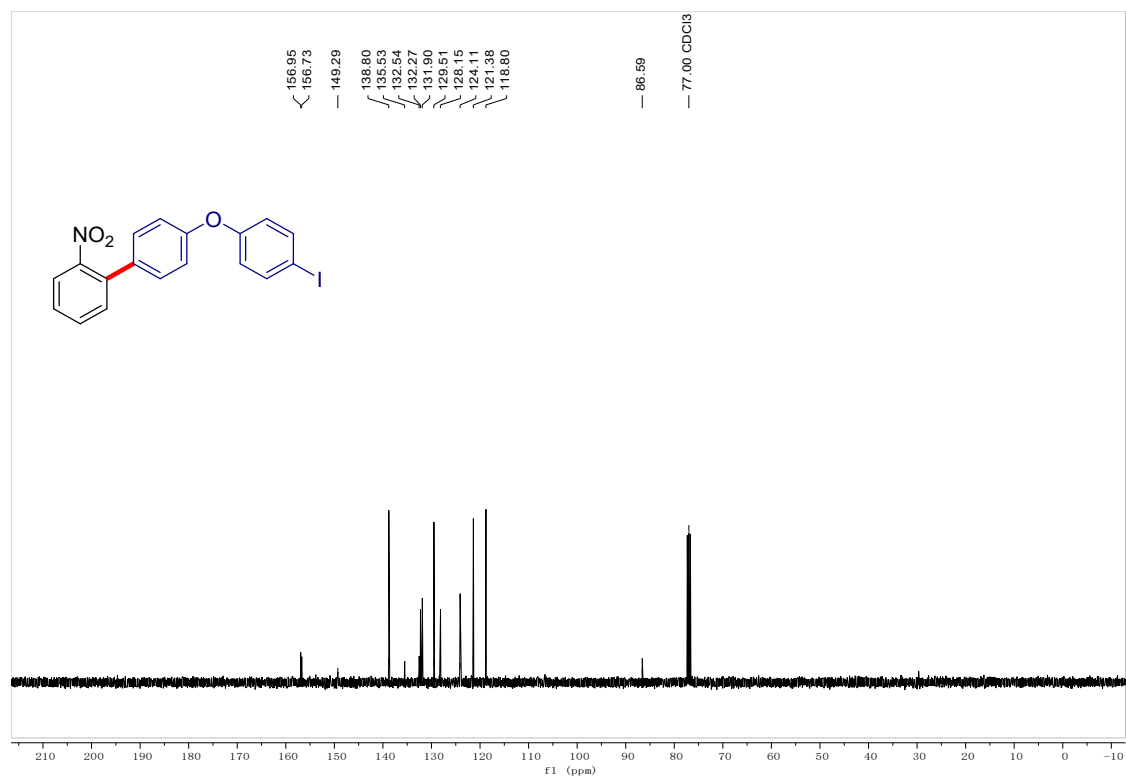

# SUPPORTING INFORMATION

<sup>1</sup>H NMR spectra (400 MHz) of **59** in CDCl<sub>3</sub>.

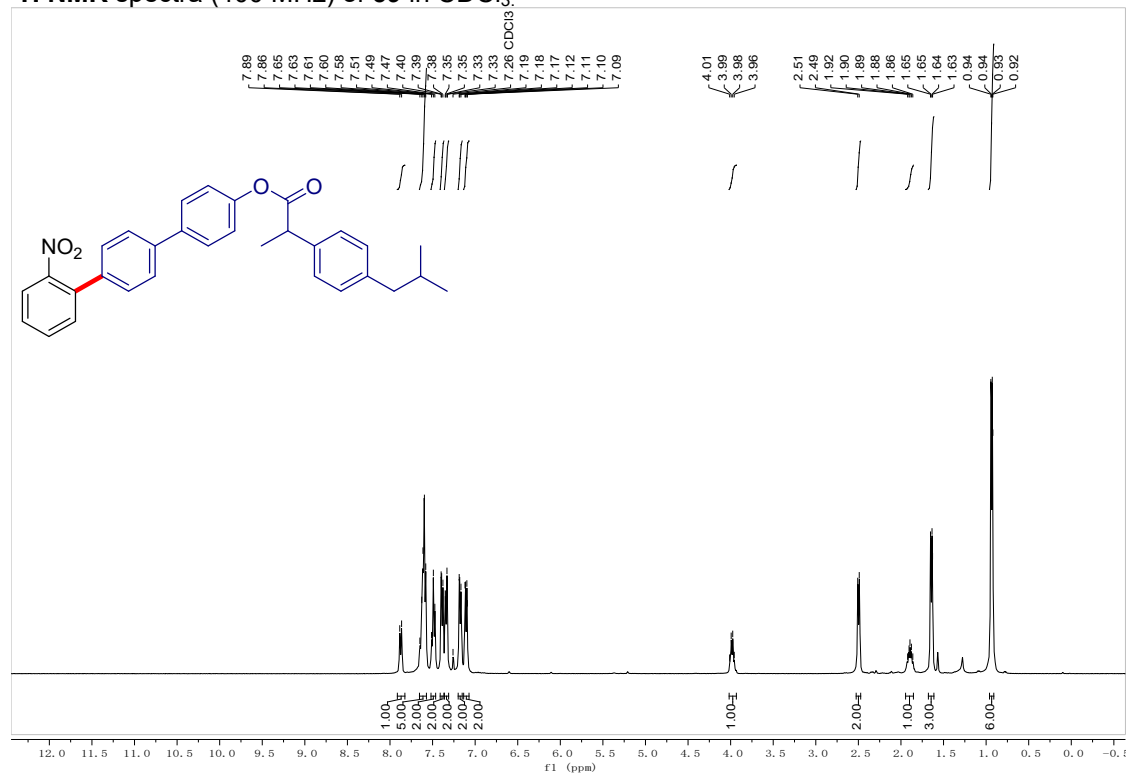

<sup>13</sup>C NMR spectra (101 MHz) of **59** in CDCl<sub>3</sub>.

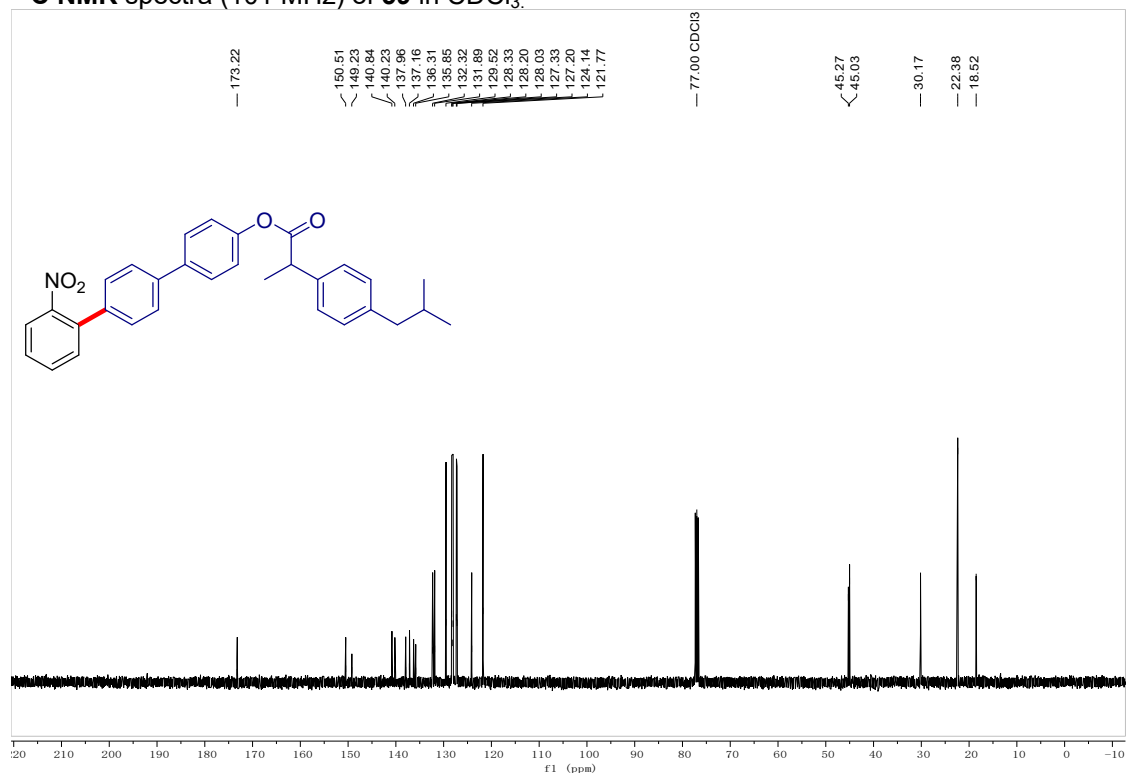

# SUPPORTING INFORMATION

<sup>1</sup>H NMR spectra (400 MHz) of **60** in CDCl<sub>3</sub>.

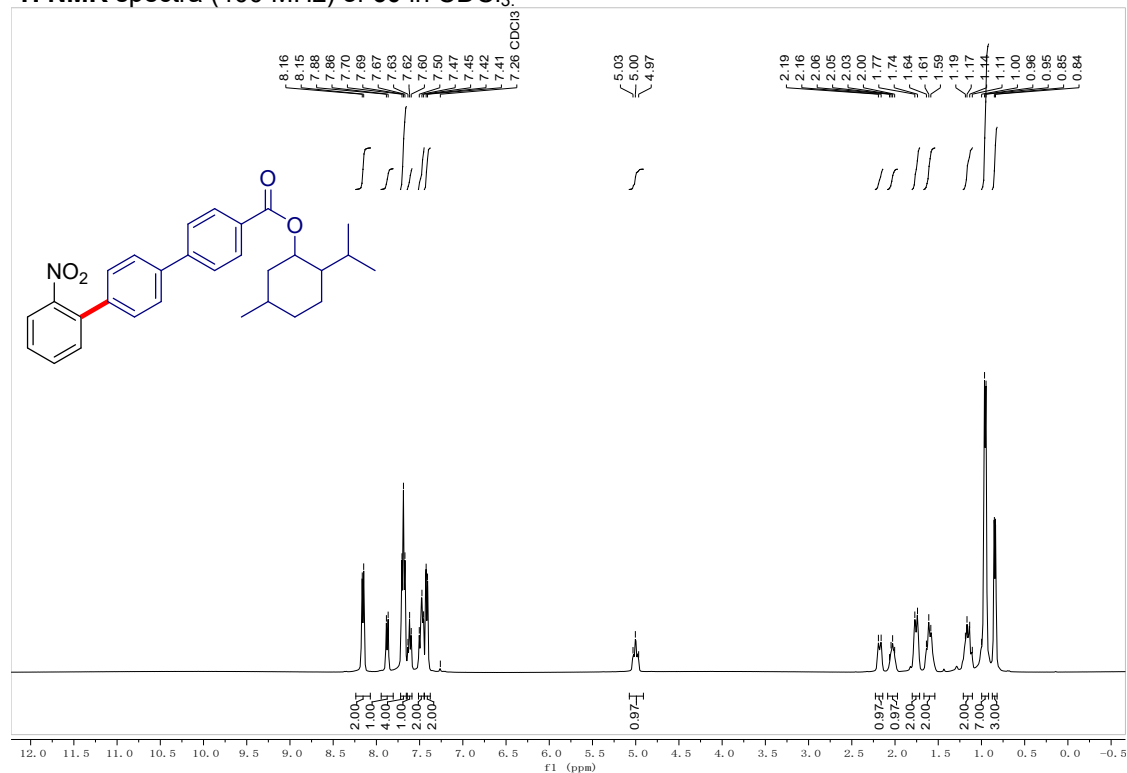

<sup>13</sup>C NMR spectra (101 MHz) of **60** in CDCl<sub>3</sub>.

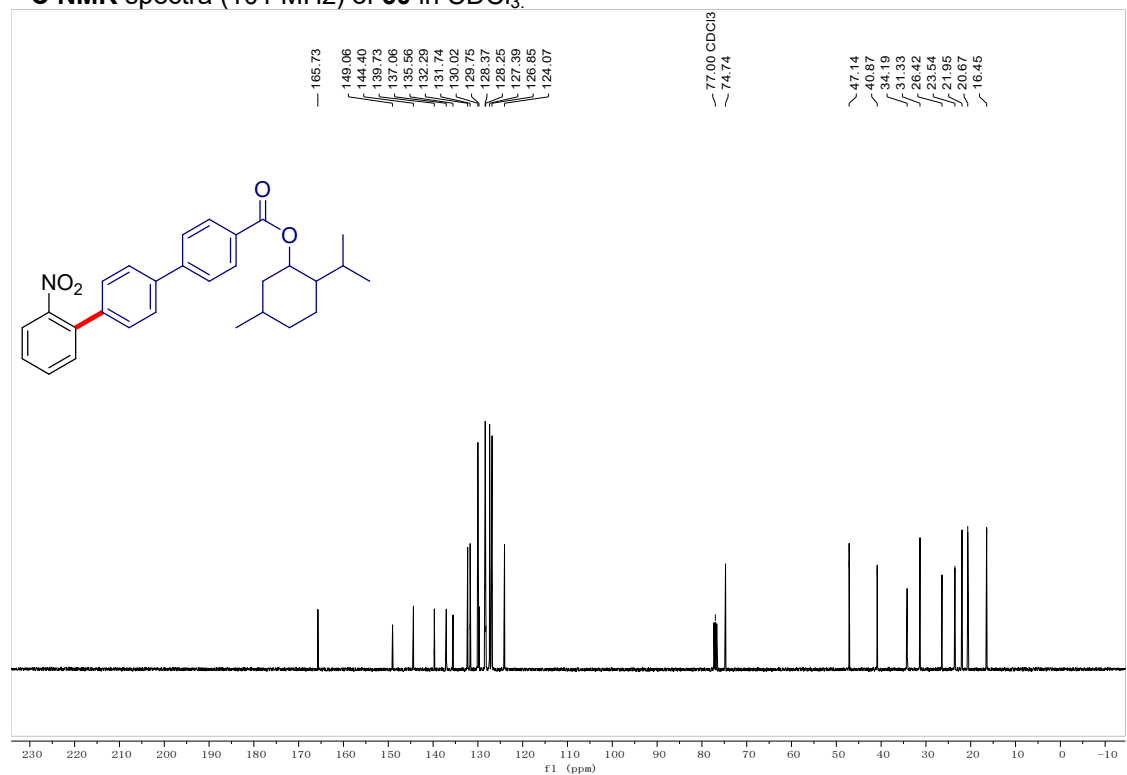

# SUPPORTING INFORMATION

<sup>1</sup>H NMR spectra (400 MHz) of **61** in CDCl<sub>3</sub>.

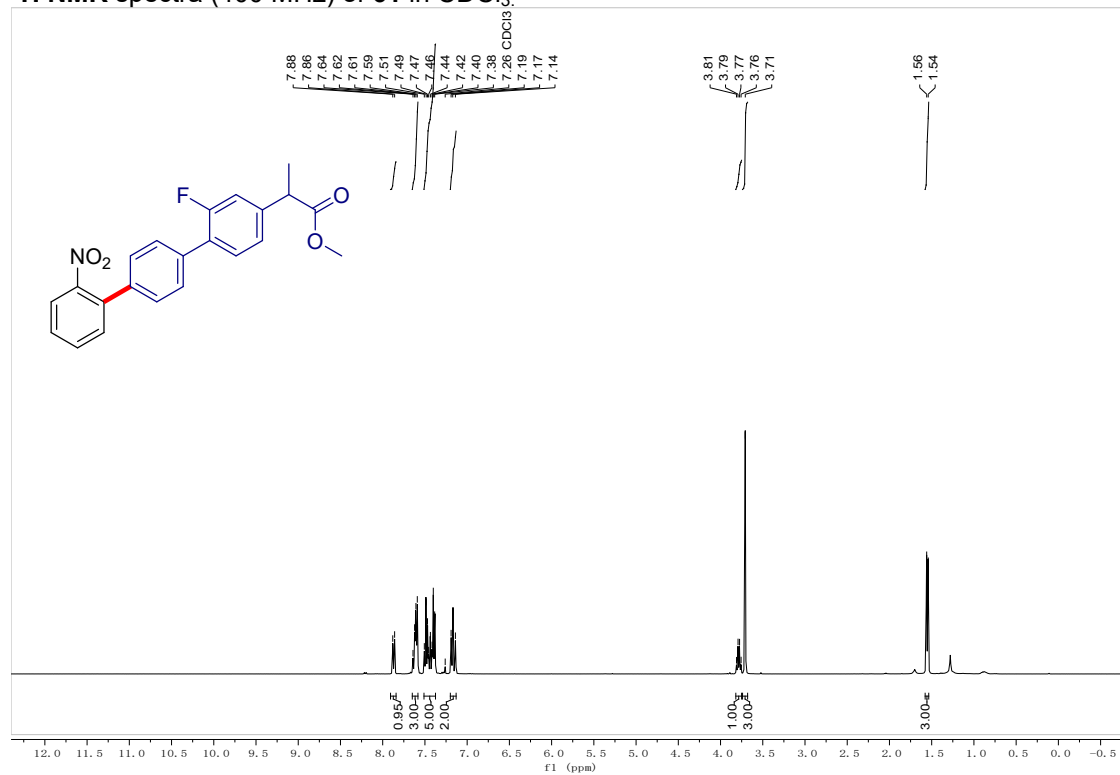

<sup>13</sup>C NMR spectra (101 MHz) of **61** in CDCl<sub>3</sub>.

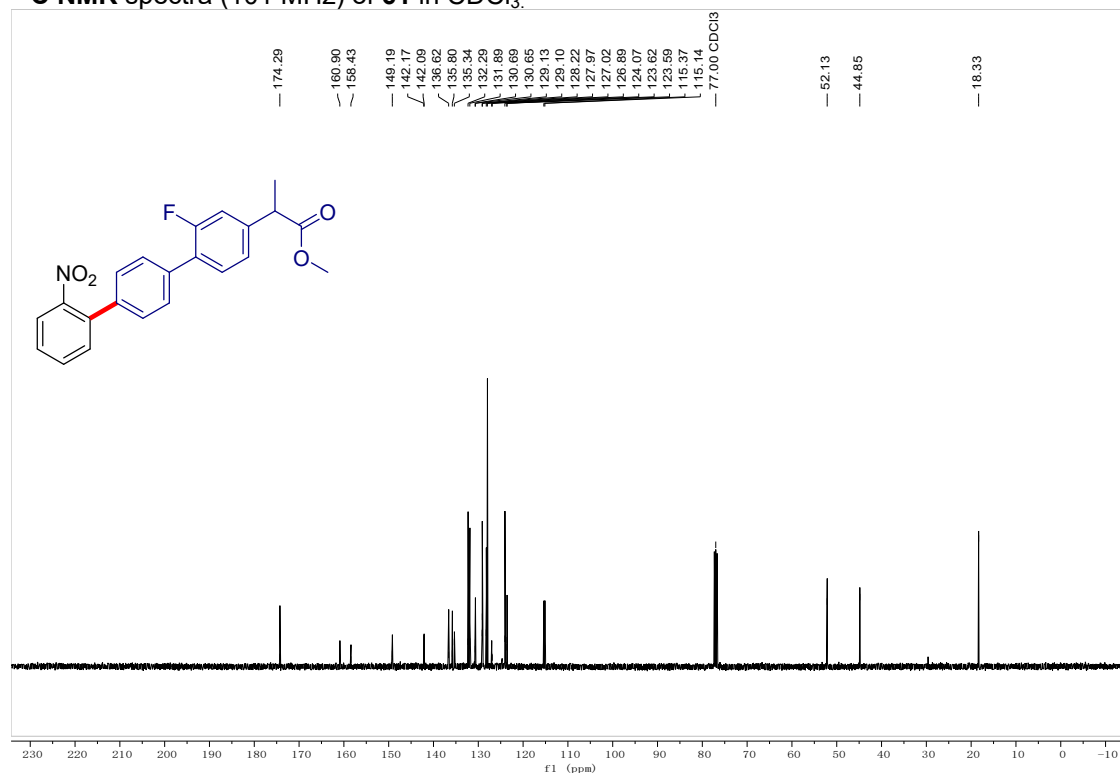

# SUPPORTING INFORMATION

<sup>19</sup>F NMR spectra (101 MHz) of **61** in CDCl<sub>3</sub>.

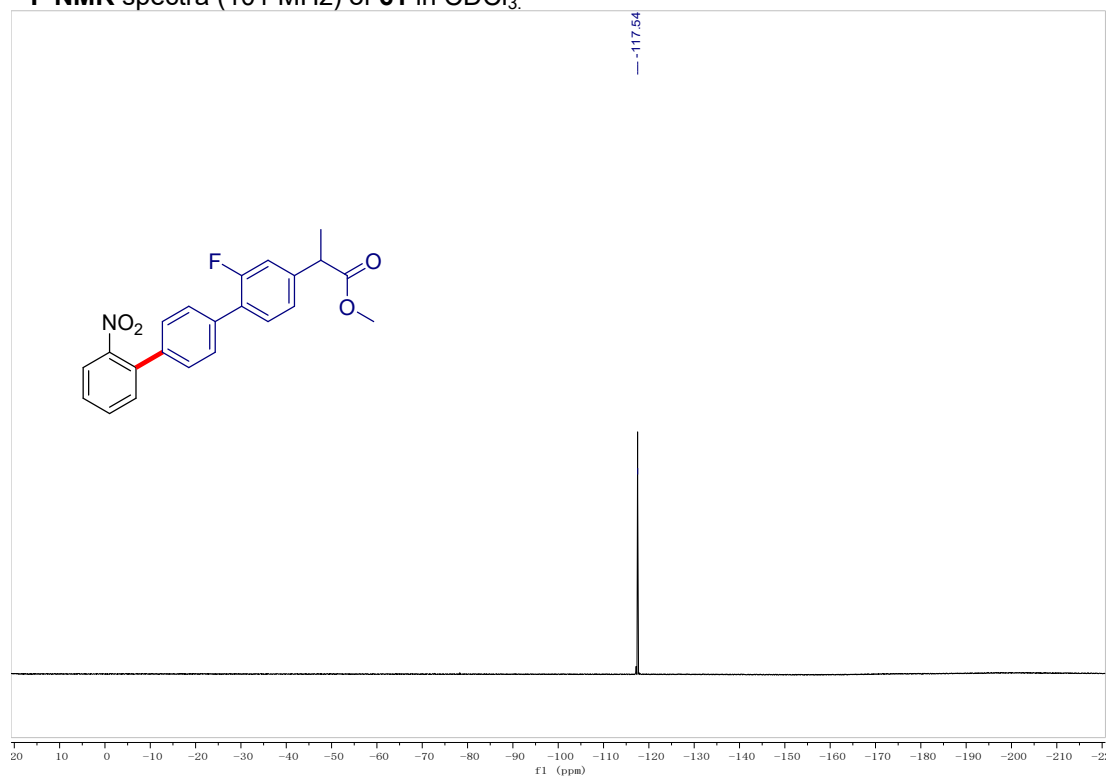

# SUPPORTING INFORMATION

$^1\text{H}$  NMR spectra (400 MHz) of **62** in  $\text{CDCl}_3$ .

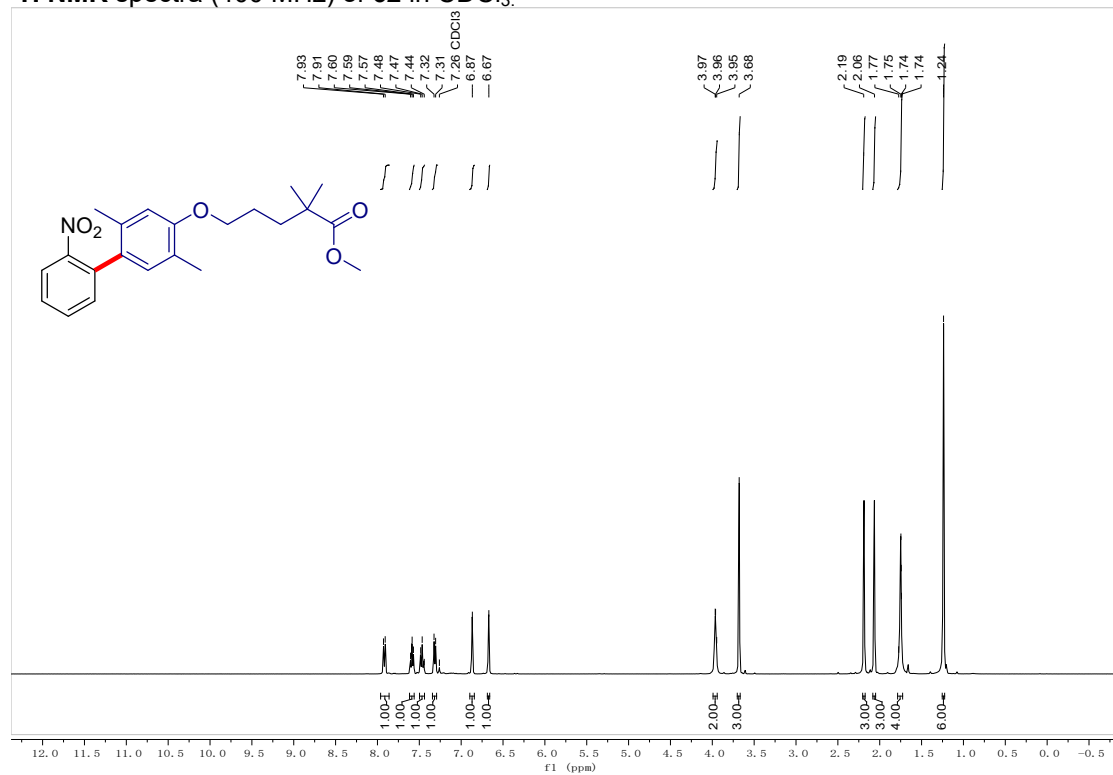

$^{13}\text{C}$  NMR spectra (101 MHz) of **62** in  $\text{CDCl}_3$ .

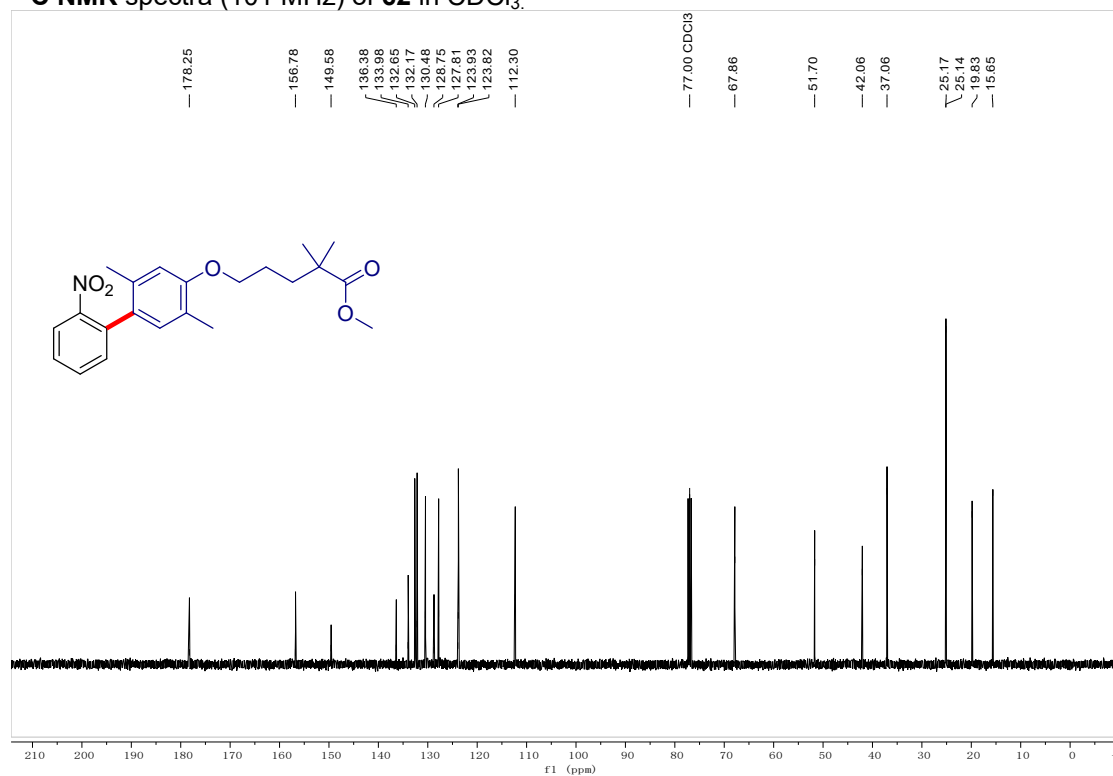

# SUPPORTING INFORMATION

$^1\text{H}$  NMR spectra (400 MHz) of **63** in  $\text{CDCl}_3$ .

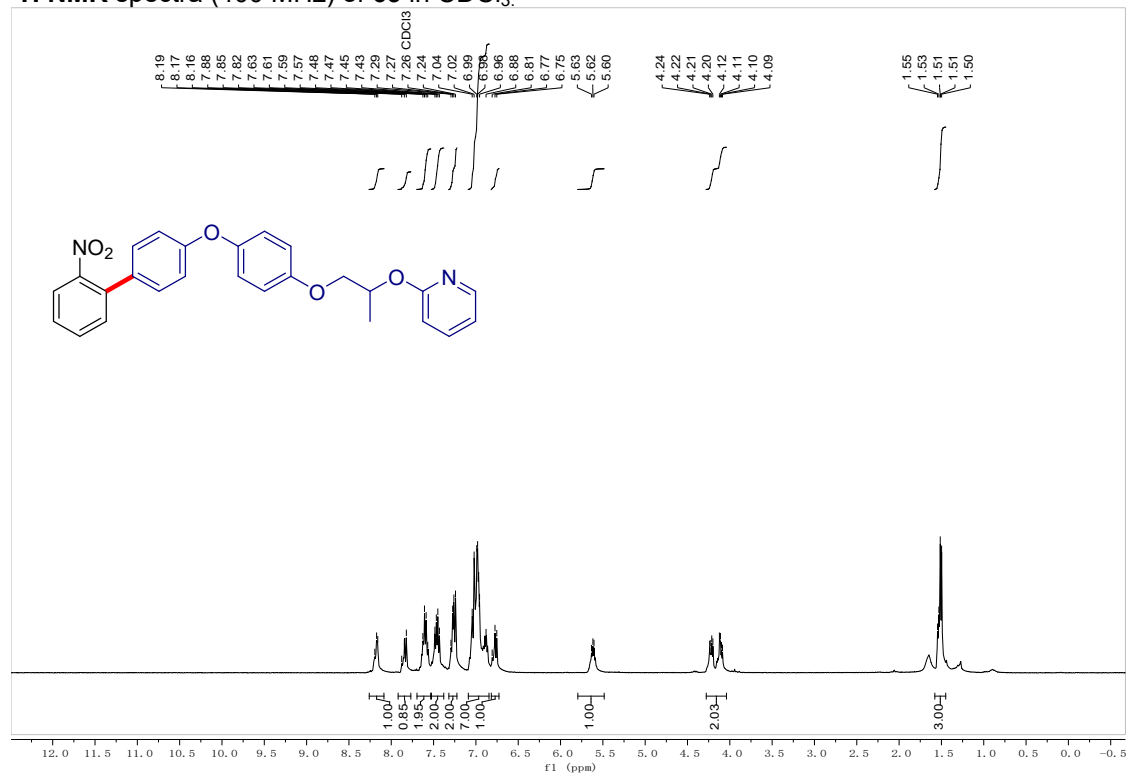

$^{13}\text{C}$  NMR spectra (101 MHz) of **63** in  $\text{CDCl}_3$ .

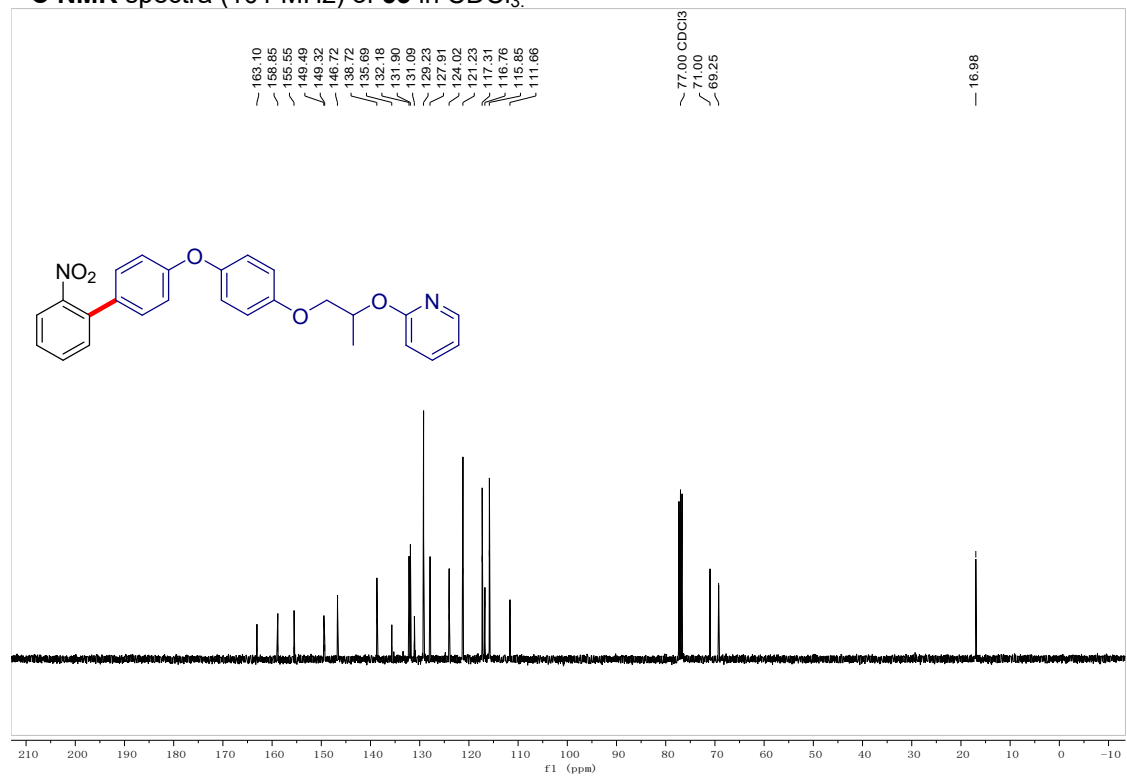

# SUPPORTING INFORMATION

$^1\text{H}$  NMR spectra (400 MHz) of **64** in  $\text{CDCl}_3$ .

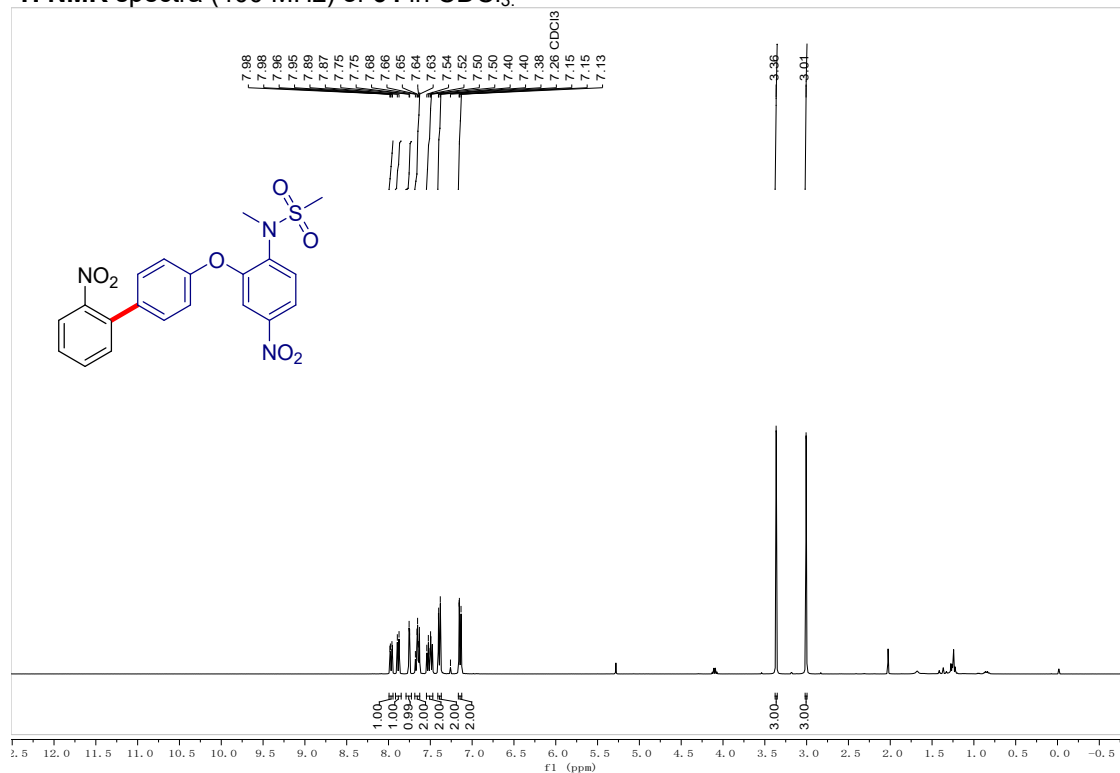

$^{13}\text{C}$  NMR spectra (101 MHz) of **64** in  $\text{CDCl}_3$ .

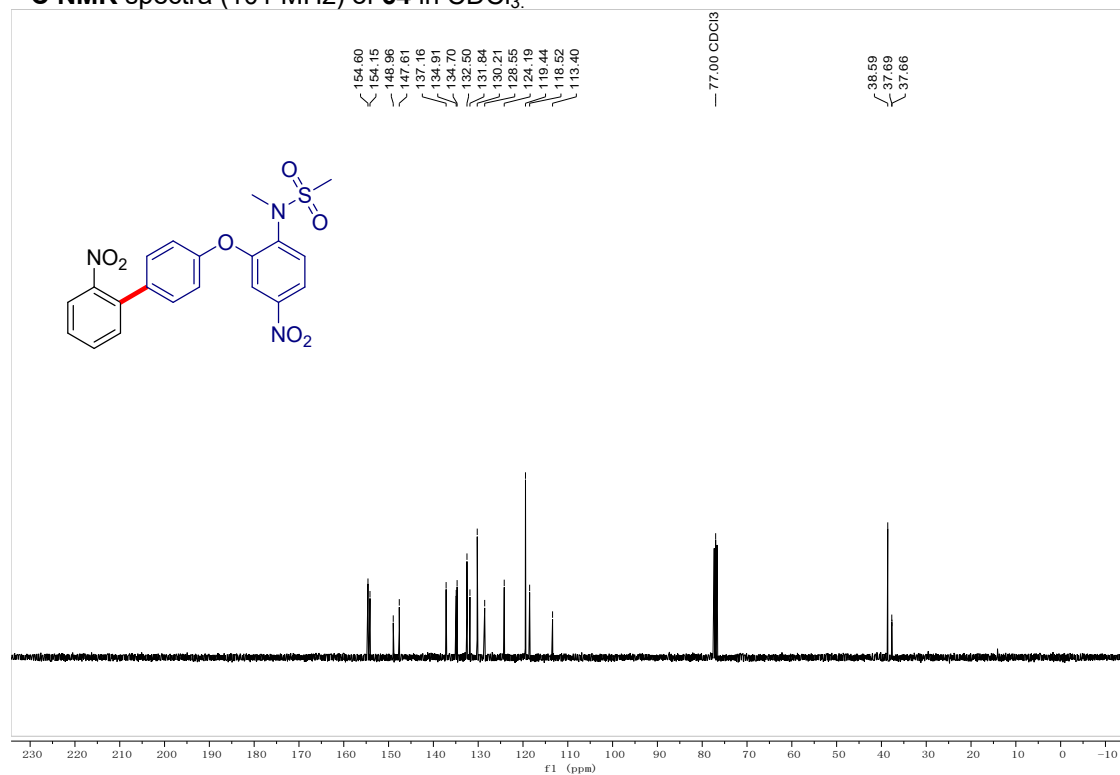

# SUPPORTING INFORMATION

$^1\text{H}$  NMR spectra (400 MHz) of **65** in  $\text{CDCl}_3$ .

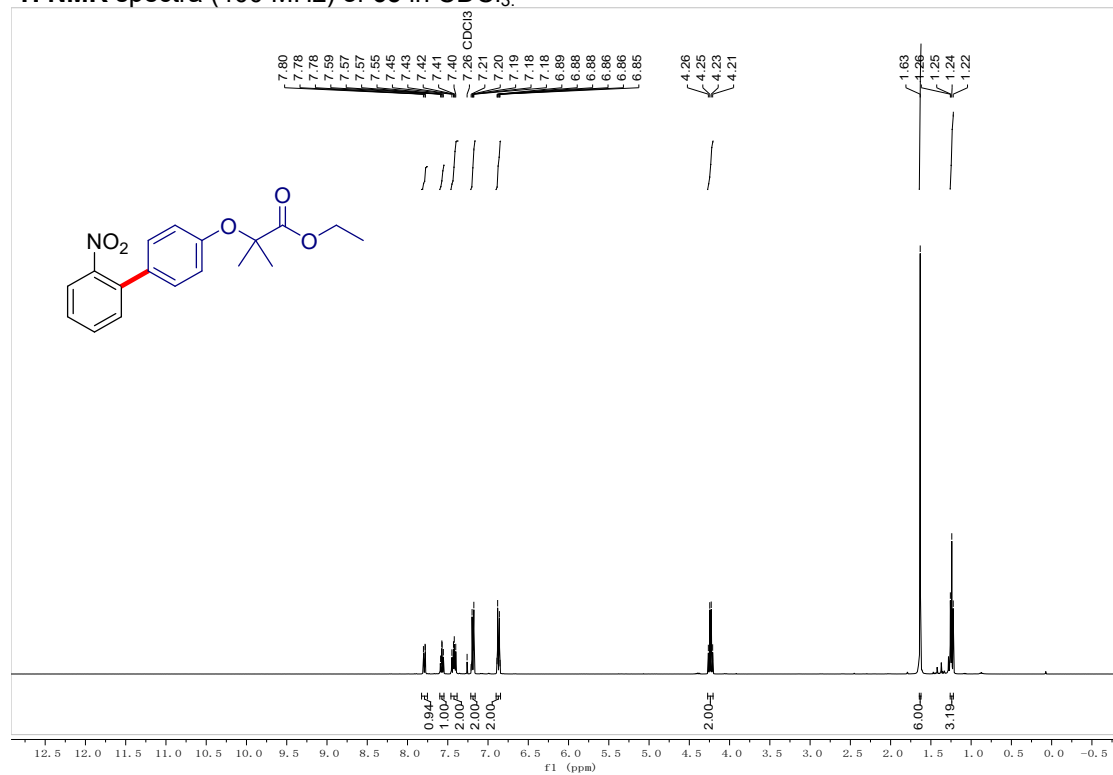

$^{13}\text{C}$  NMR spectra (101 MHz) of **65** in  $\text{CDCl}_3$ .

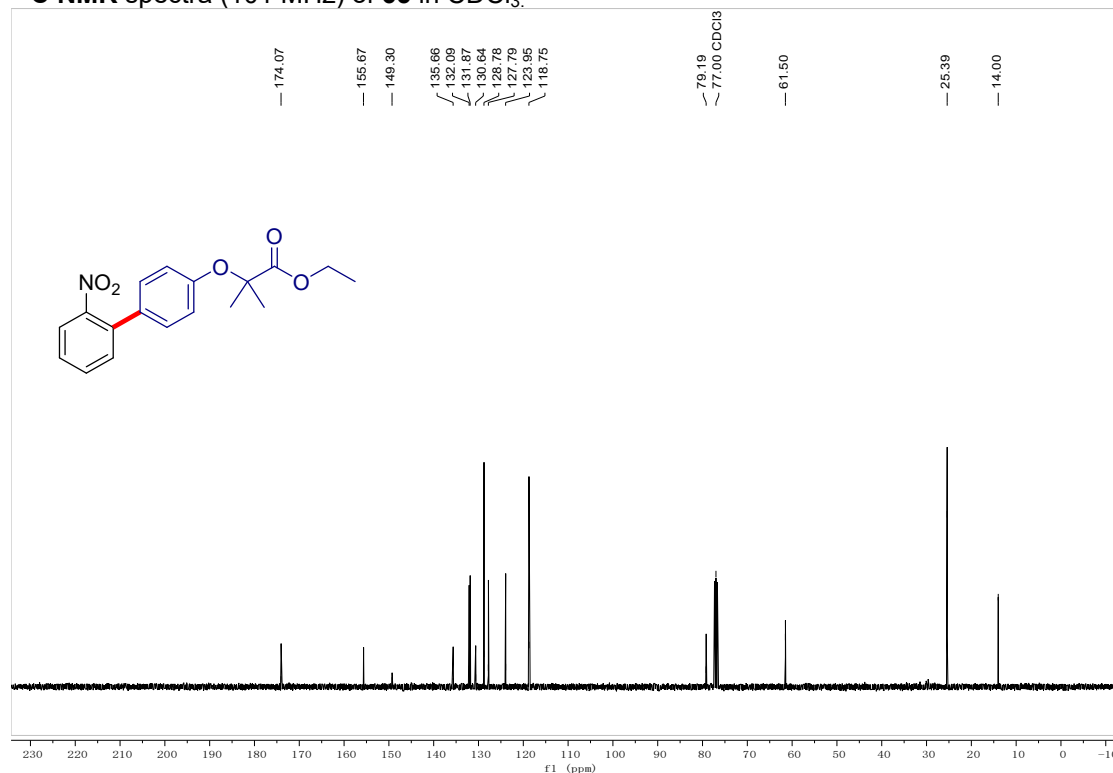

# SUPPORTING INFORMATION

<sup>1</sup>H NMR spectra (400 MHz) of **66** in CDCl<sub>3</sub>.

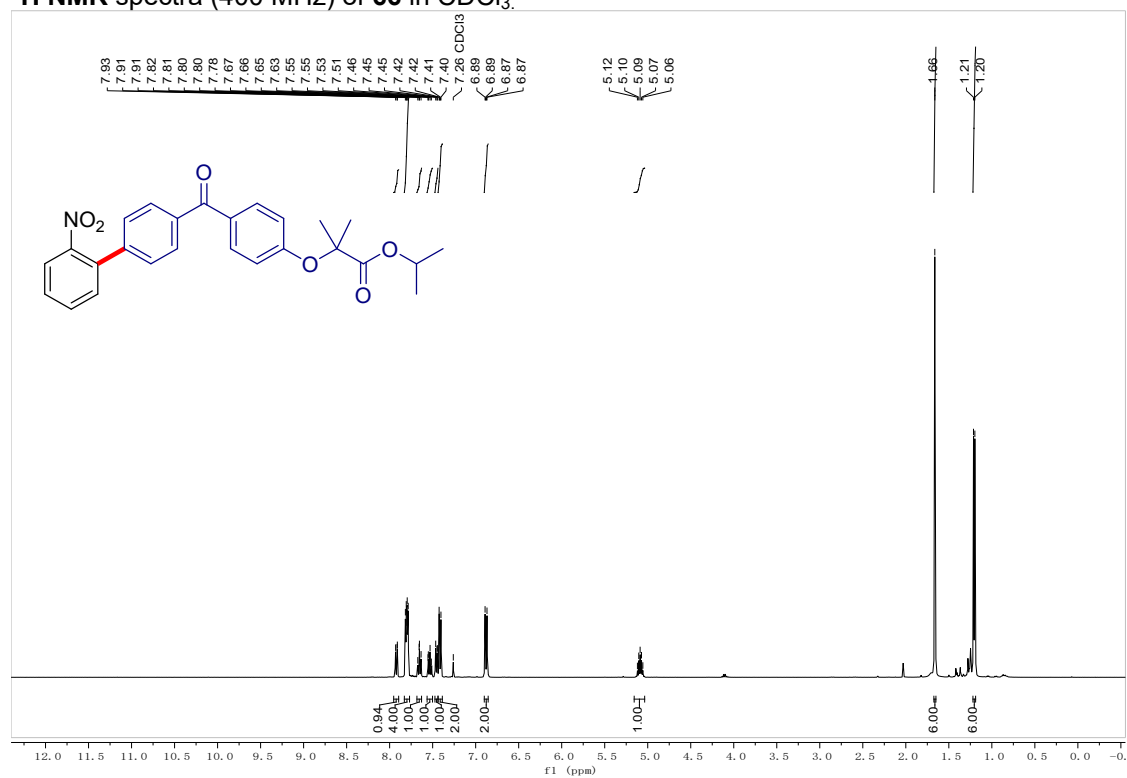

<sup>13</sup>C NMR spectra (101 MHz) of **66** in CDCl<sub>3</sub>.

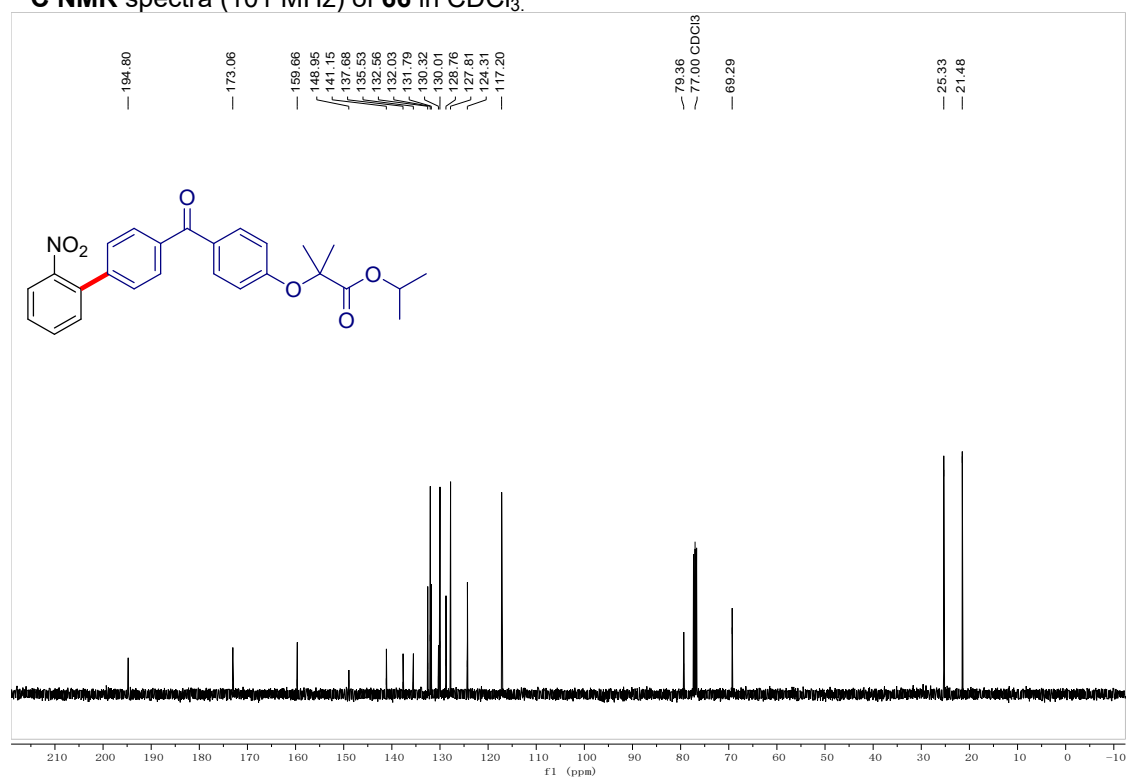

# SUPPORTING INFORMATION

<sup>1</sup>H NMR spectra (400 MHz) of **67** in CDCl<sub>3</sub>.

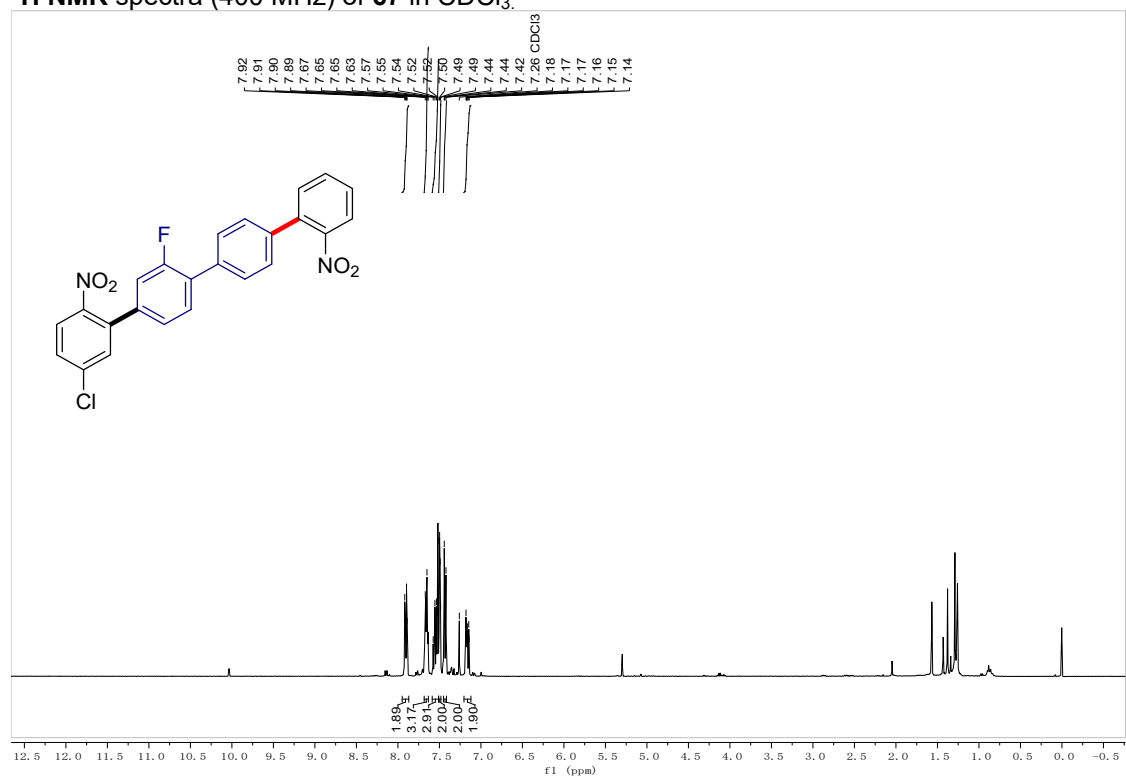

<sup>13</sup>C NMR spectra (101 MHz) of **67** in CDCl<sub>3</sub>.

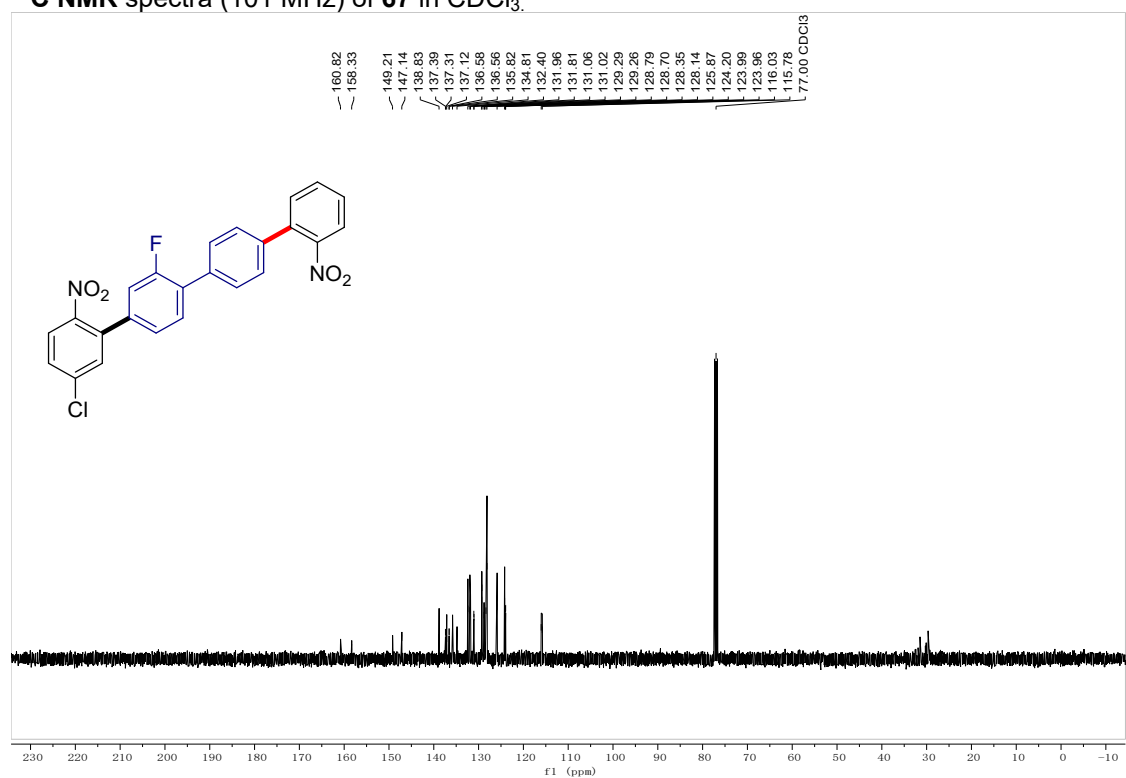

## SUPPORTING INFORMATION

$^{19}\text{F}$  NMR spectra (377 MHz) of **67** in  $\text{CDCl}_3$ .

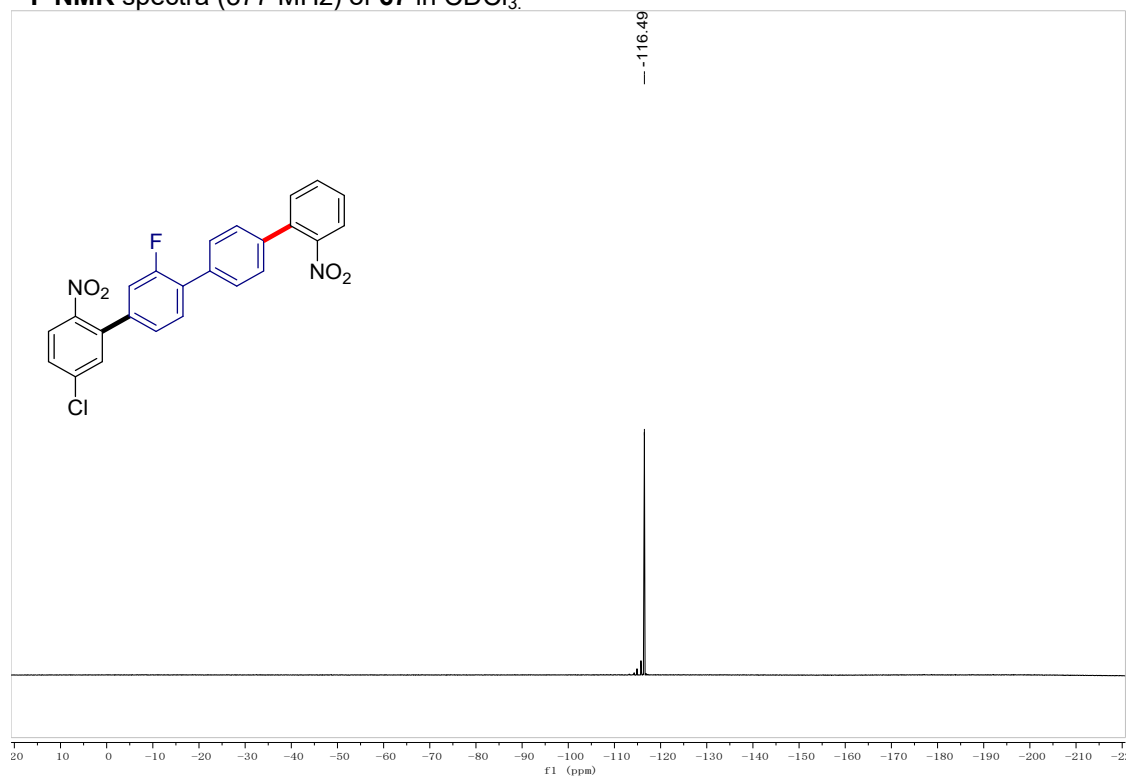

# SUPPORTING INFORMATION

$^1\text{H}$  NMR spectra (400 MHz) of **68** in  $\text{CDCl}_3$ .

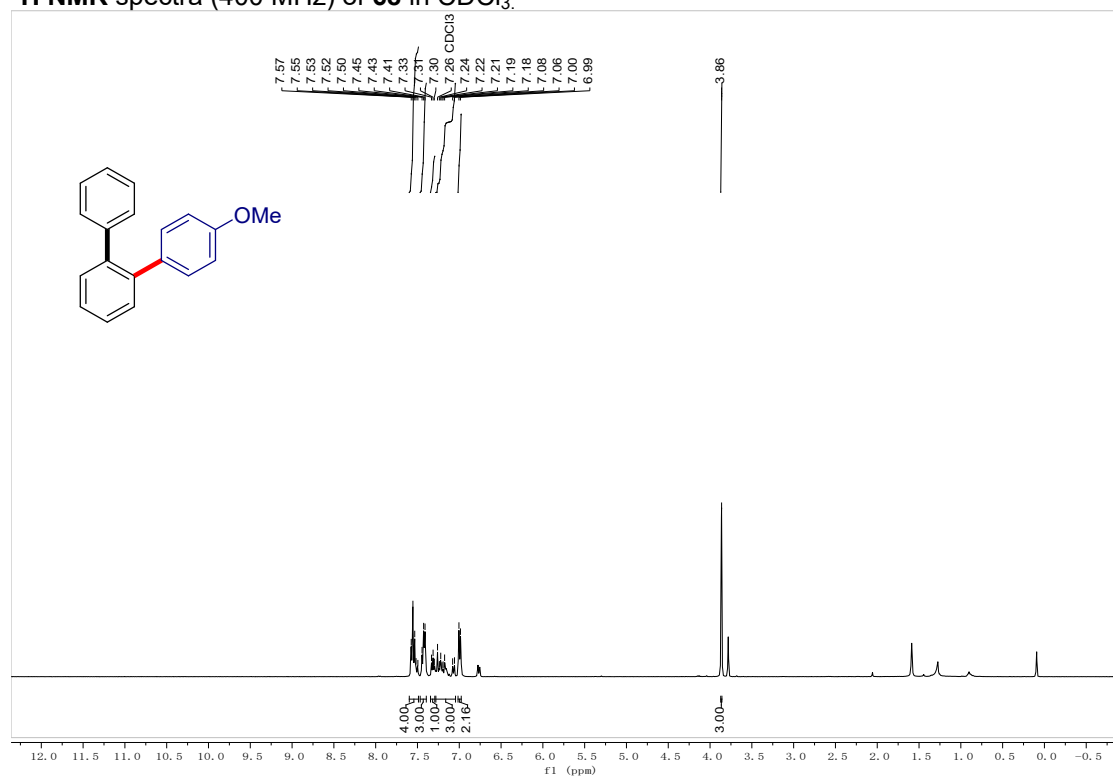

# SUPPORTING INFORMATION

**<sup>1</sup>H NMR spectra (400 MHz) of **69** in CDCl<sub>3</sub>.**

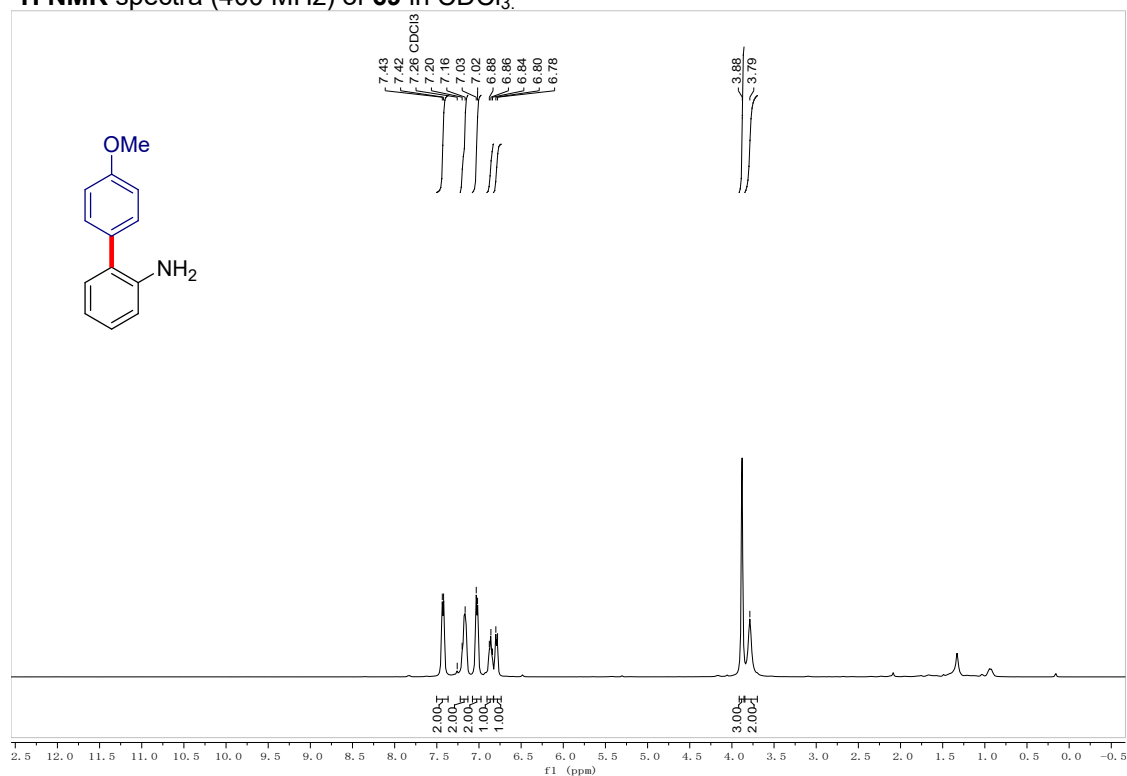

**<sup>13</sup>C NMR spectra (101 MHz) of **69** in CDCl<sub>3</sub>.**

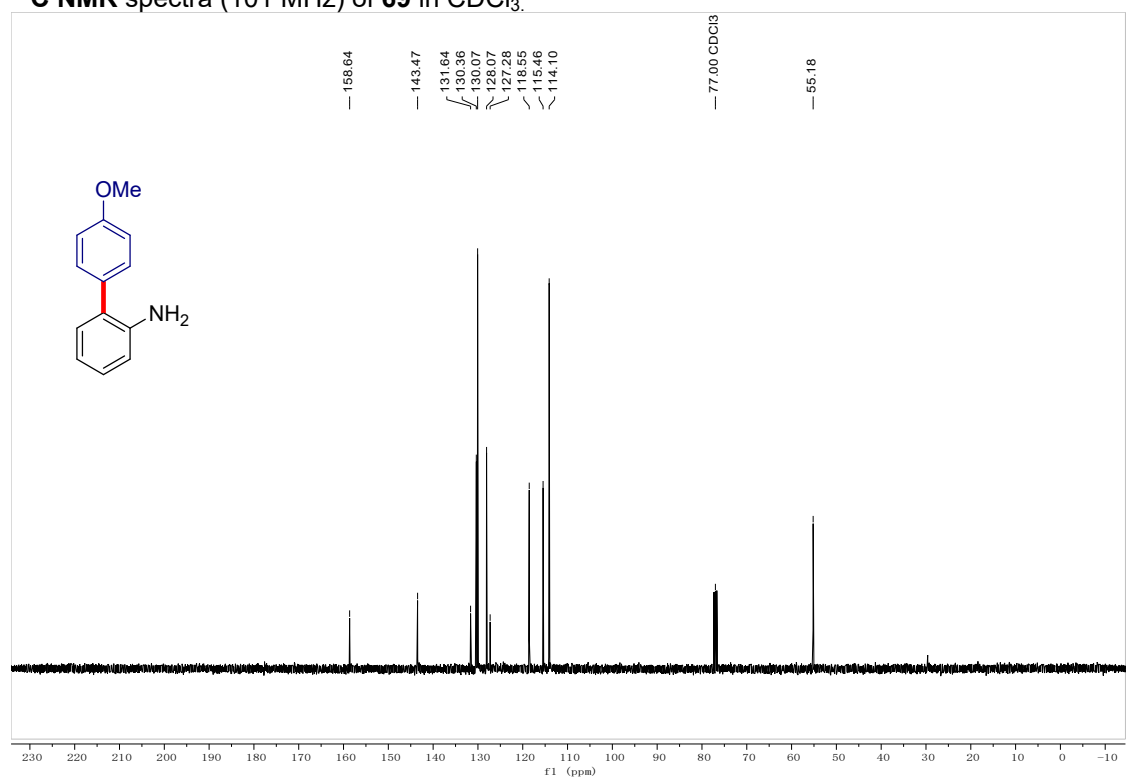

# SUPPORTING INFORMATION

<sup>1</sup>H NMR spectra (400 MHz) of **70** in D<sub>2</sub>O.

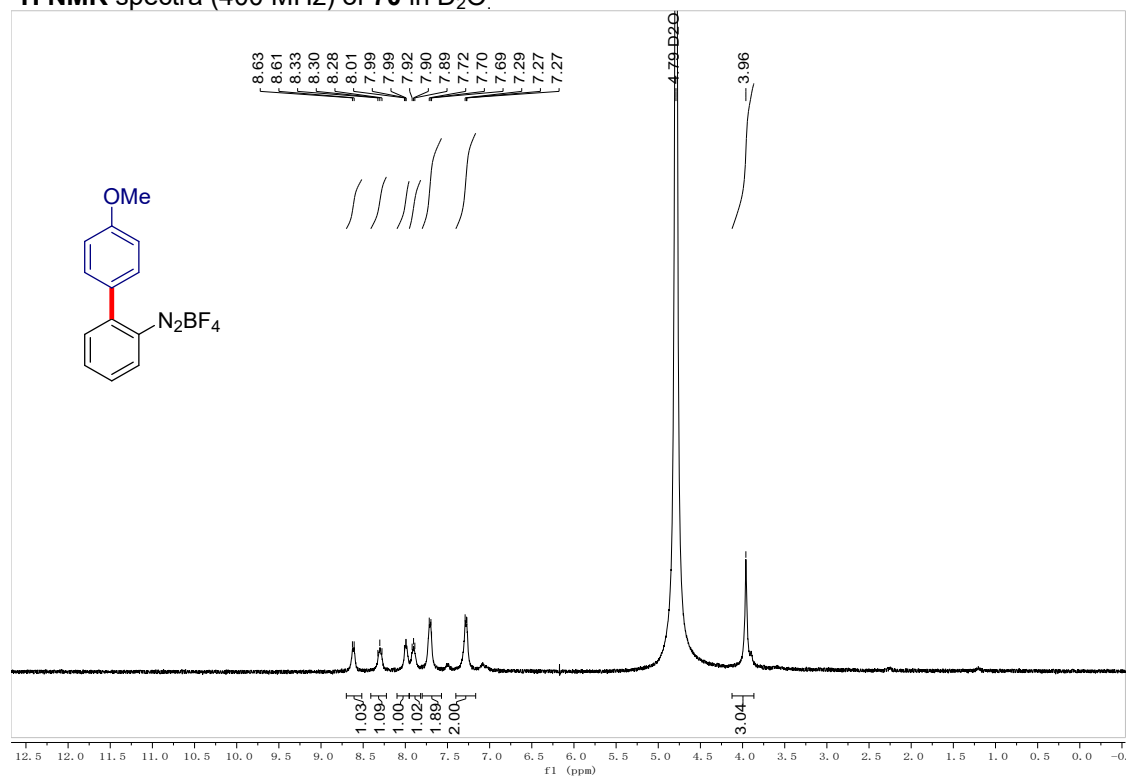

# SUPPORTING INFORMATION

$^1\text{H}$  NMR spectra (400 MHz) of **71** in  $\text{CDCl}_3$ .

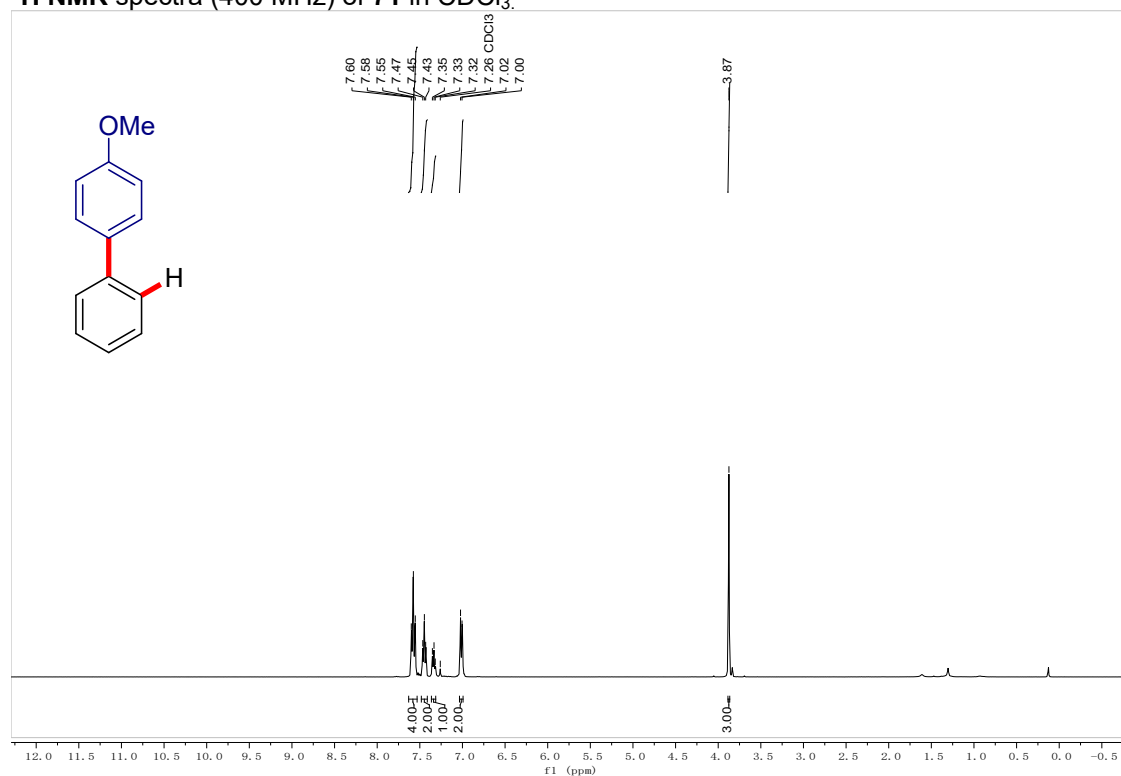

$^{13}\text{C}$  NMR spectra (101 MHz) of **71** in  $\text{CDCl}_3$ .

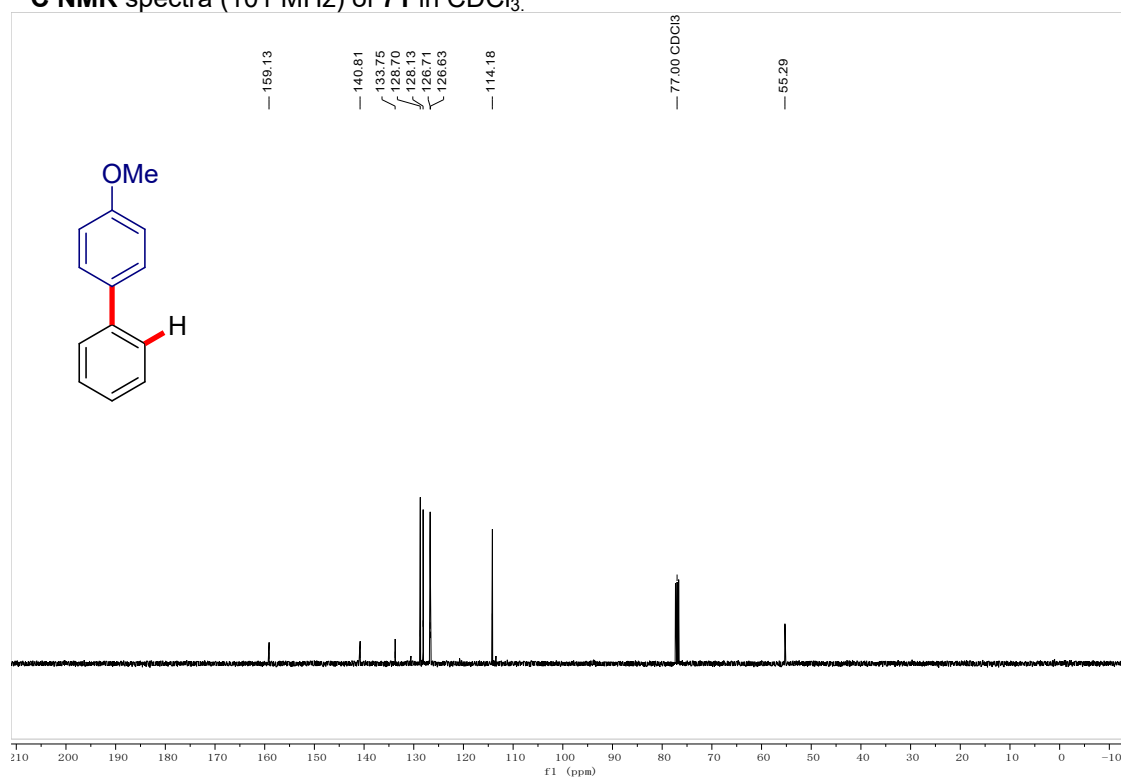

# SUPPORTING INFORMATION

$^1\text{H}$  NMR spectra (400 MHz) of **72** in  $\text{CDCl}_3$ .

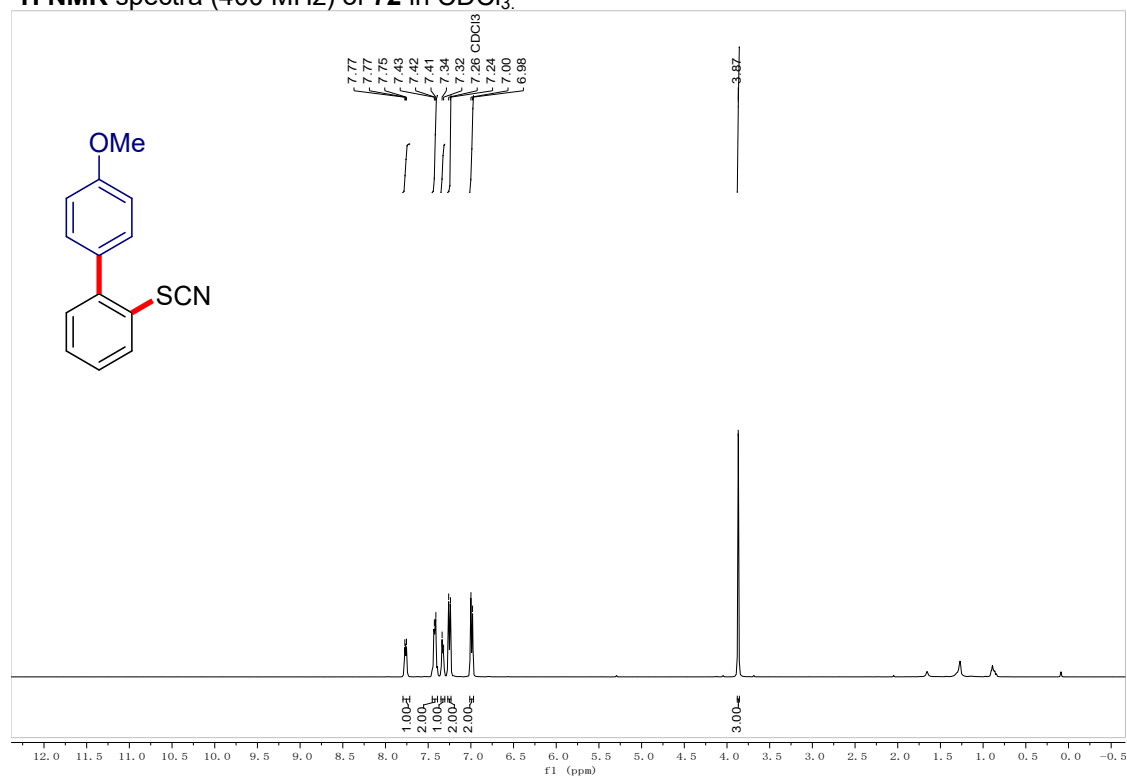

$^{13}\text{C}$  NMR spectra (101 MHz) of **72** in  $\text{CDCl}_3$ .

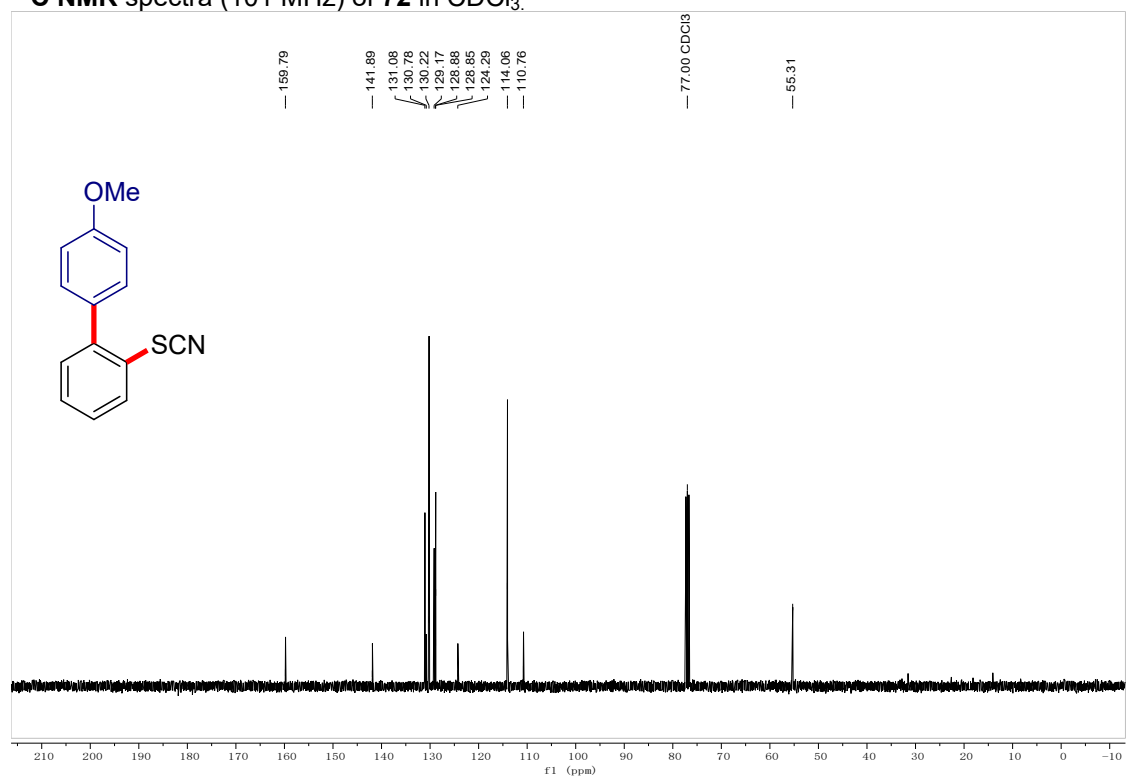

# SUPPORTING INFORMATION

$^1\text{H}$  NMR spectra (400 MHz) of **73** in  $\text{CDCl}_3$

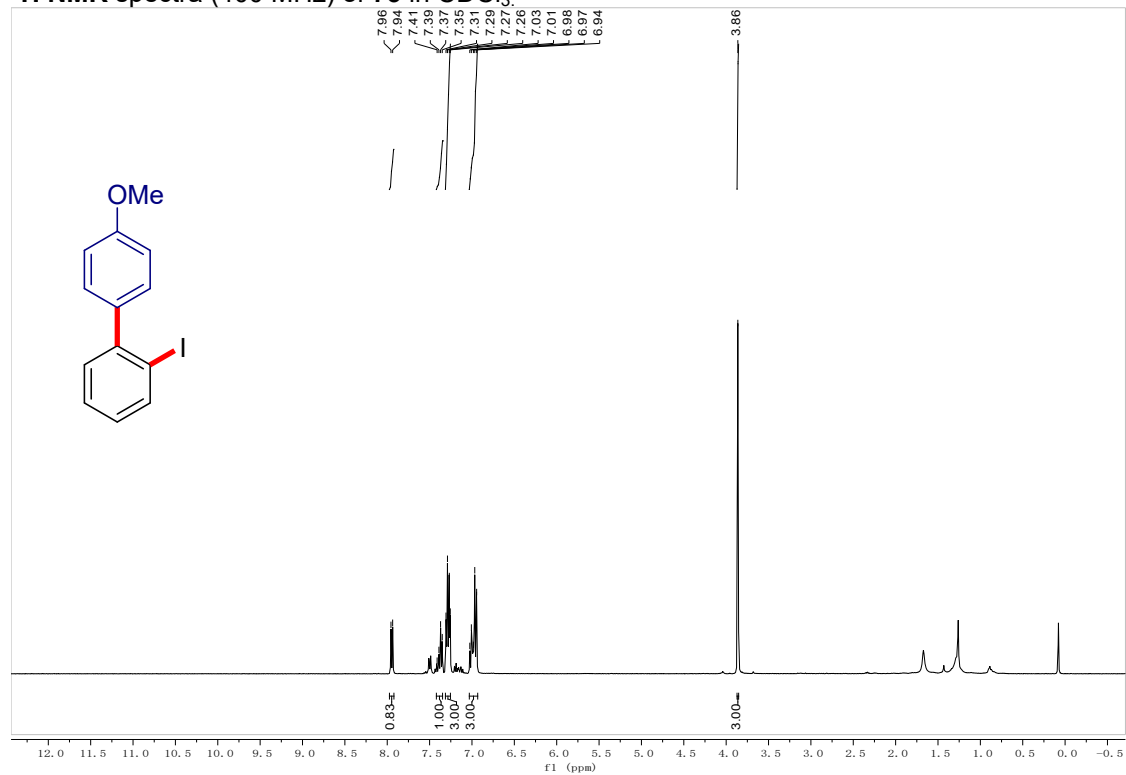

$^{13}\text{C}$  NMR spectra (101 MHz) of **73** in  $\text{CDCl}_3$

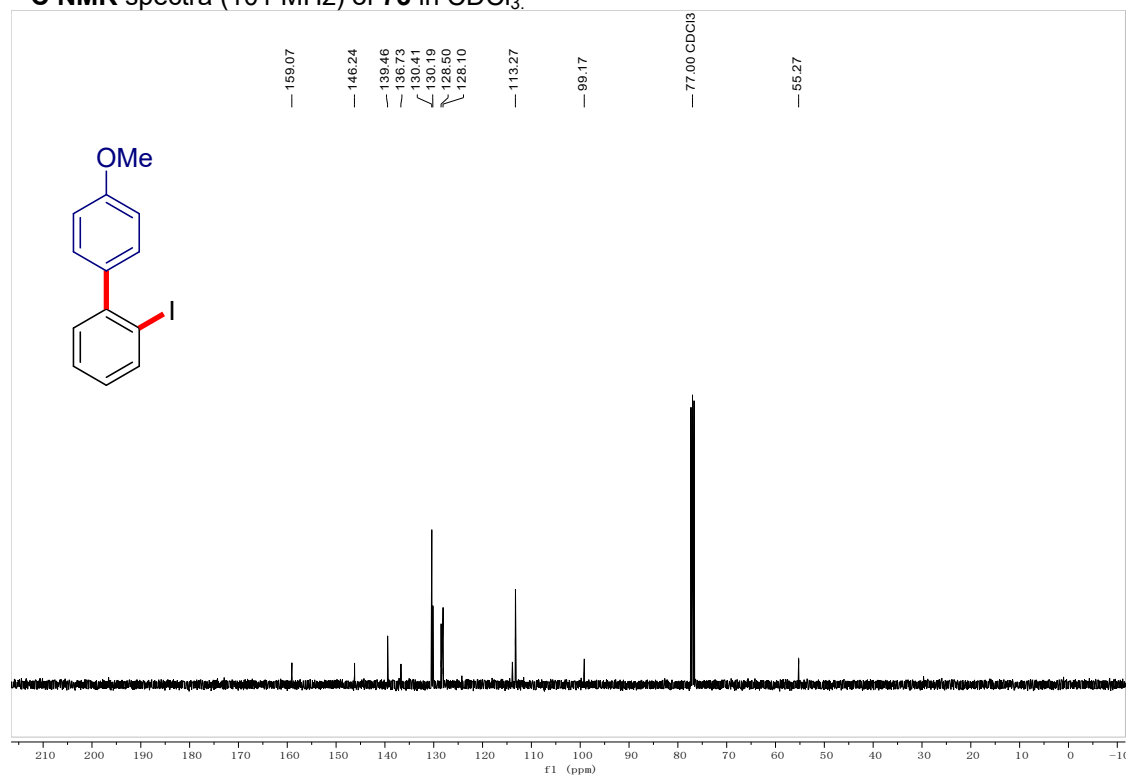

# SUPPORTING INFORMATION

<sup>1</sup>H NMR spectra (400 MHz) of **74** in CDCl<sub>3</sub>.

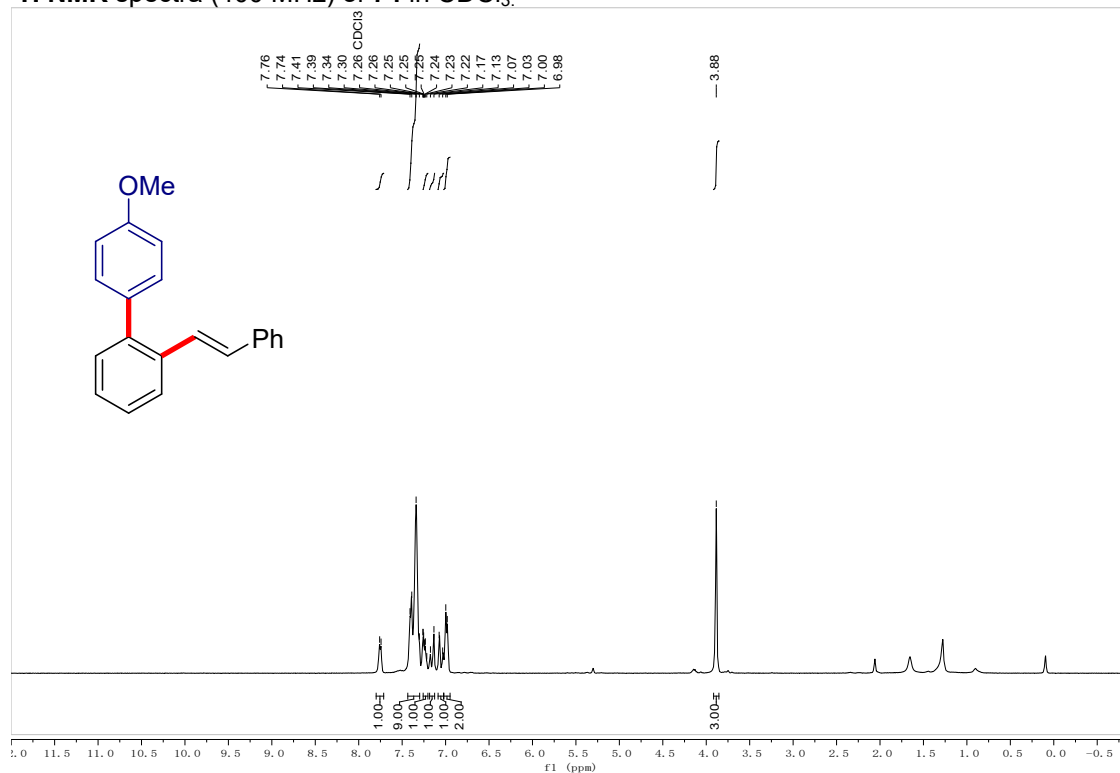

<sup>13</sup>C NMR spectra (101 MHz) of **74** in CDCl<sub>3</sub>.

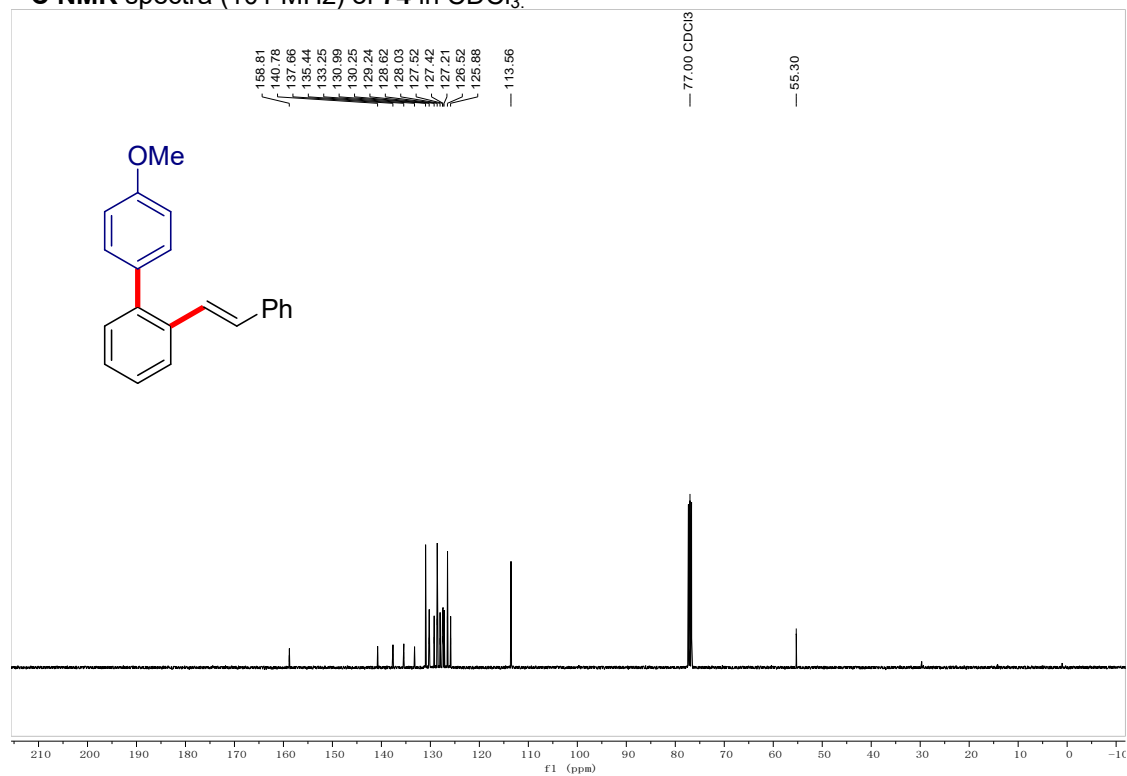

# SUPPORTING INFORMATION

<sup>1</sup>H NMR spectra (400 MHz) of **75** in CDCl<sub>3</sub>.

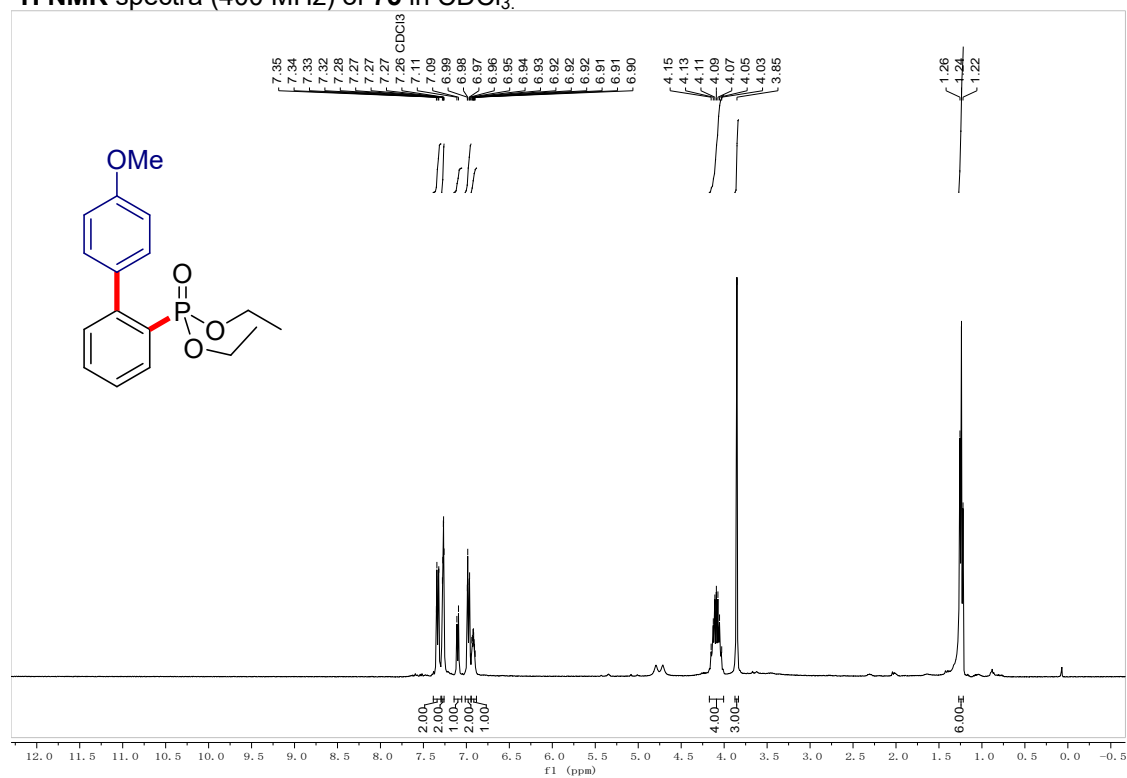

<sup>13</sup>C NMR spectra (101 MHz) of **75** in CDCl<sub>3</sub>.

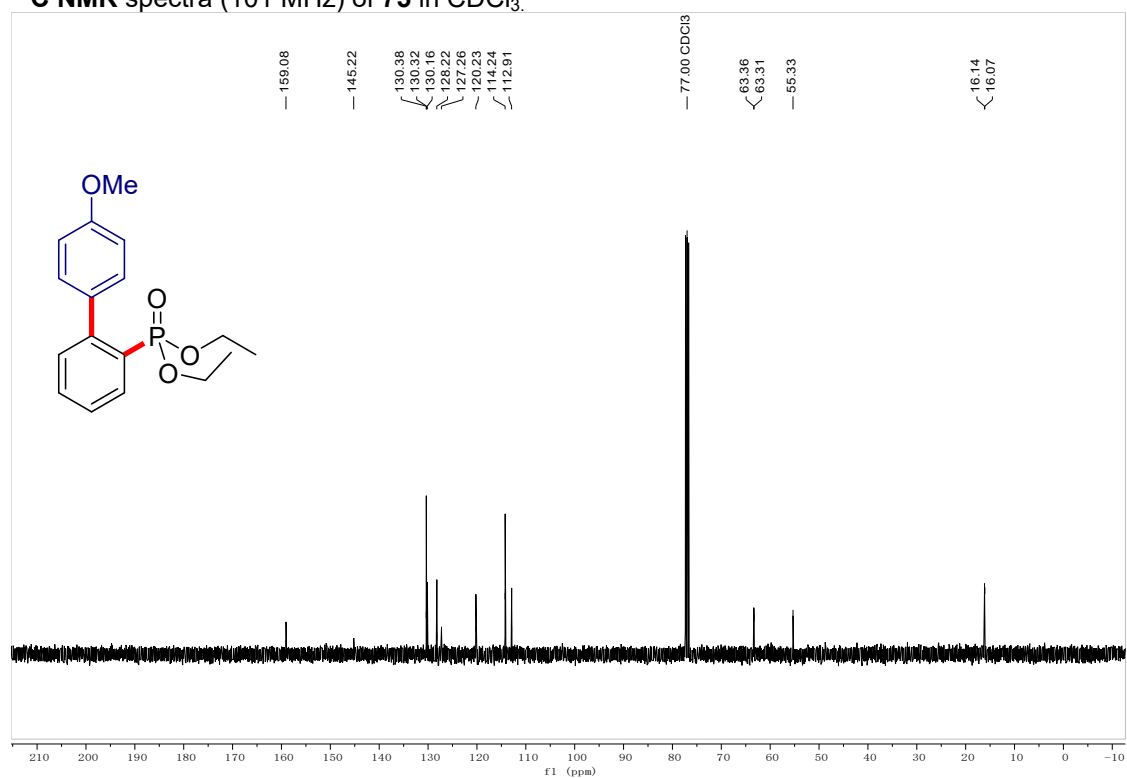

# SUPPORTING INFORMATION

$^1\text{H}$  NMR spectra (400 MHz) of **76** in  $\text{CDCl}_3$ .

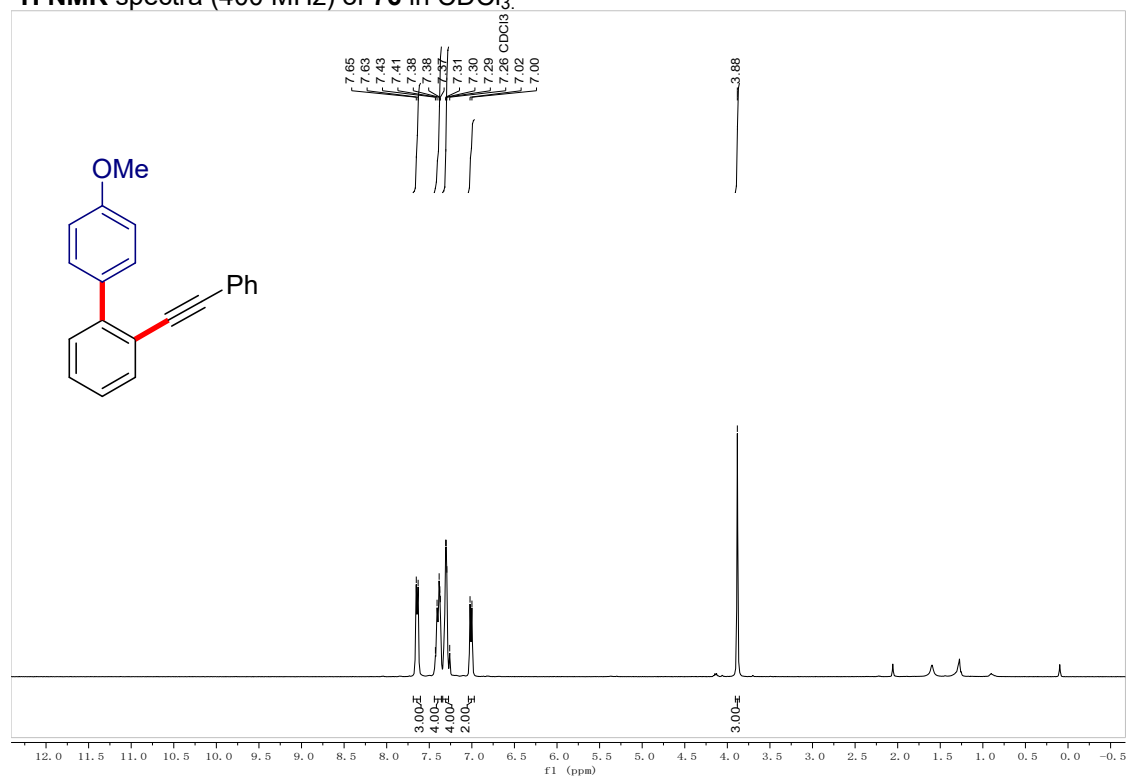

$^{13}\text{C}$  NMR spectra (101 MHz) of **76** in  $\text{CDCl}_3$ .

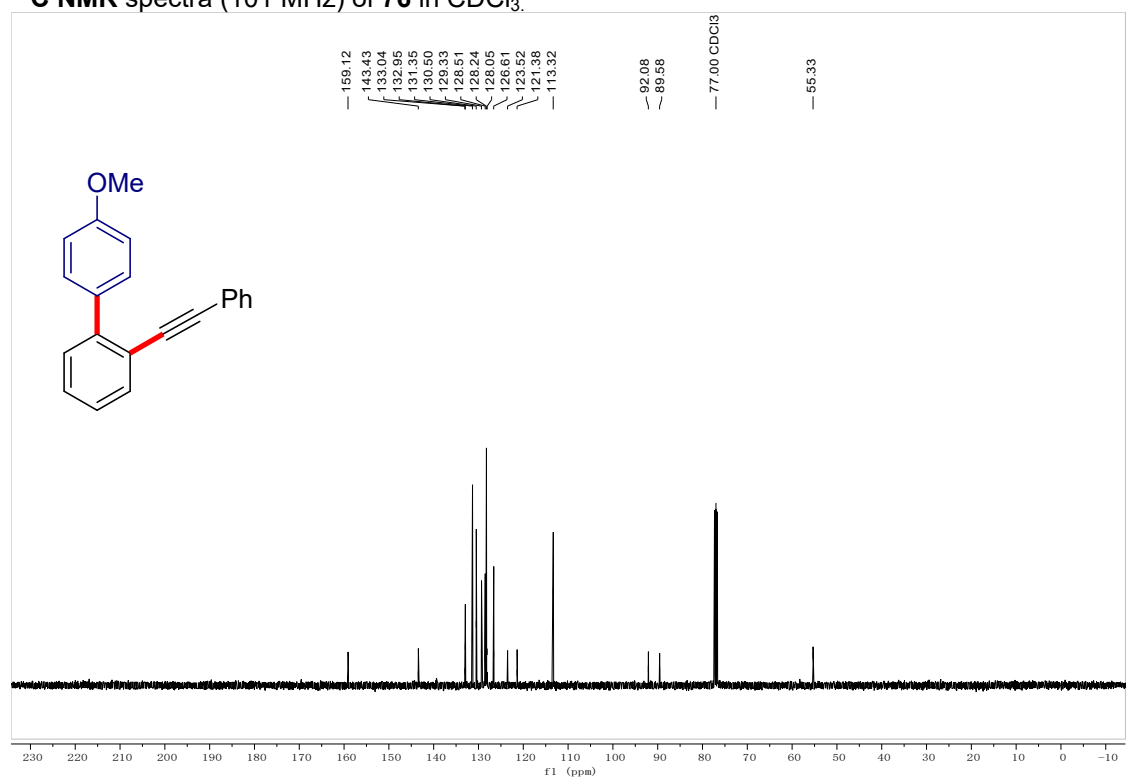

# SUPPORTING INFORMATION

$^1\text{H}$  NMR spectra (400 MHz) of **77** in  $\text{CDCl}_3$ .

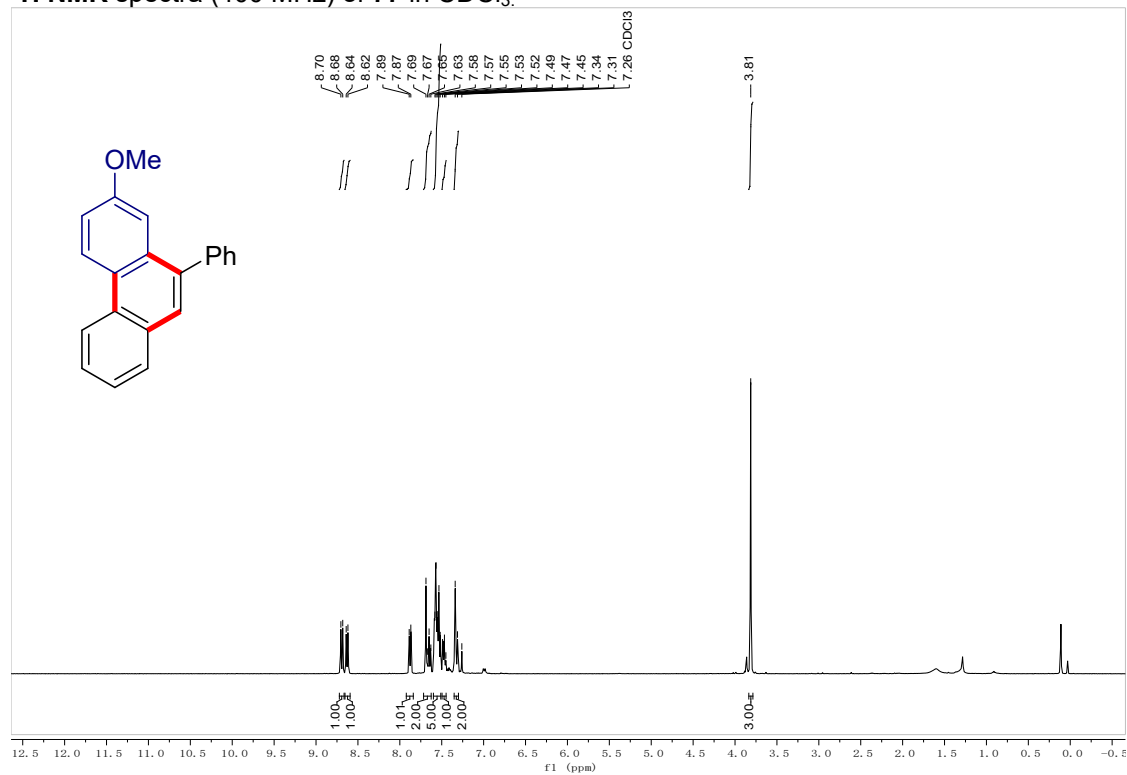

$^{13}\text{C}$  NMR spectra (101 MHz) of **77** in  $\text{CDCl}_3$ .

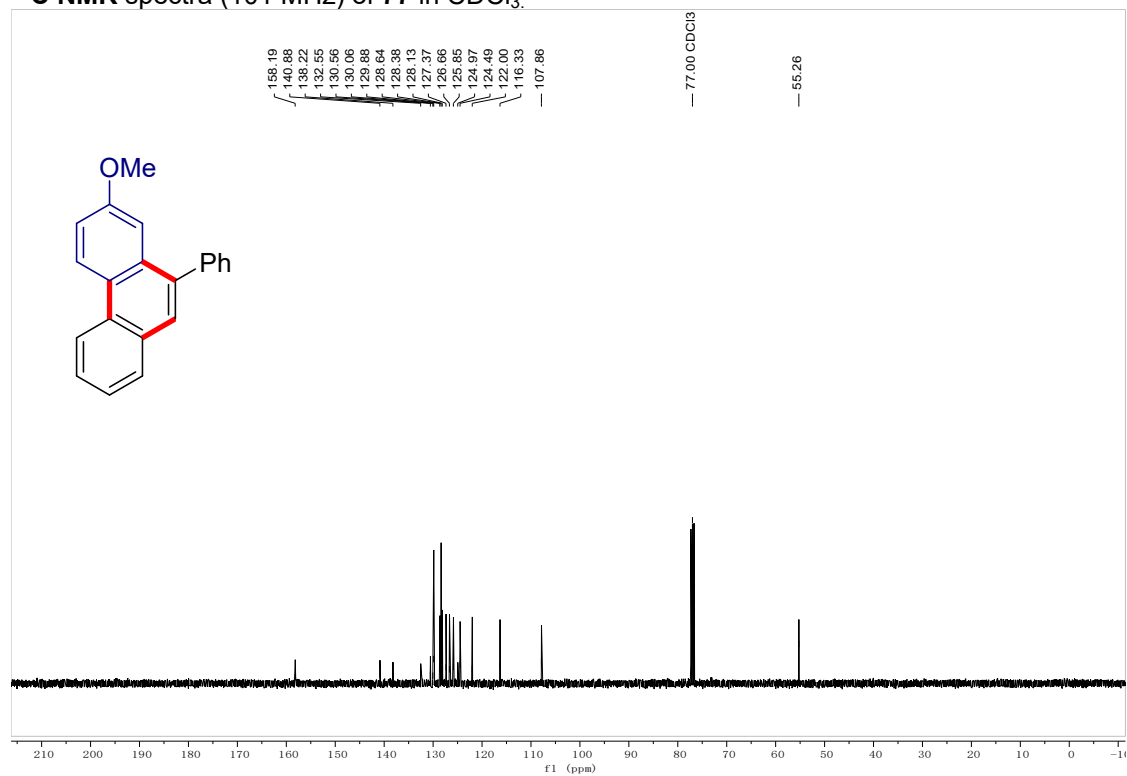

# SUPPORTING INFORMATION

**<sup>1</sup>H NMR spectra (400 MHz) of 78 in CDCl<sub>3</sub>.**

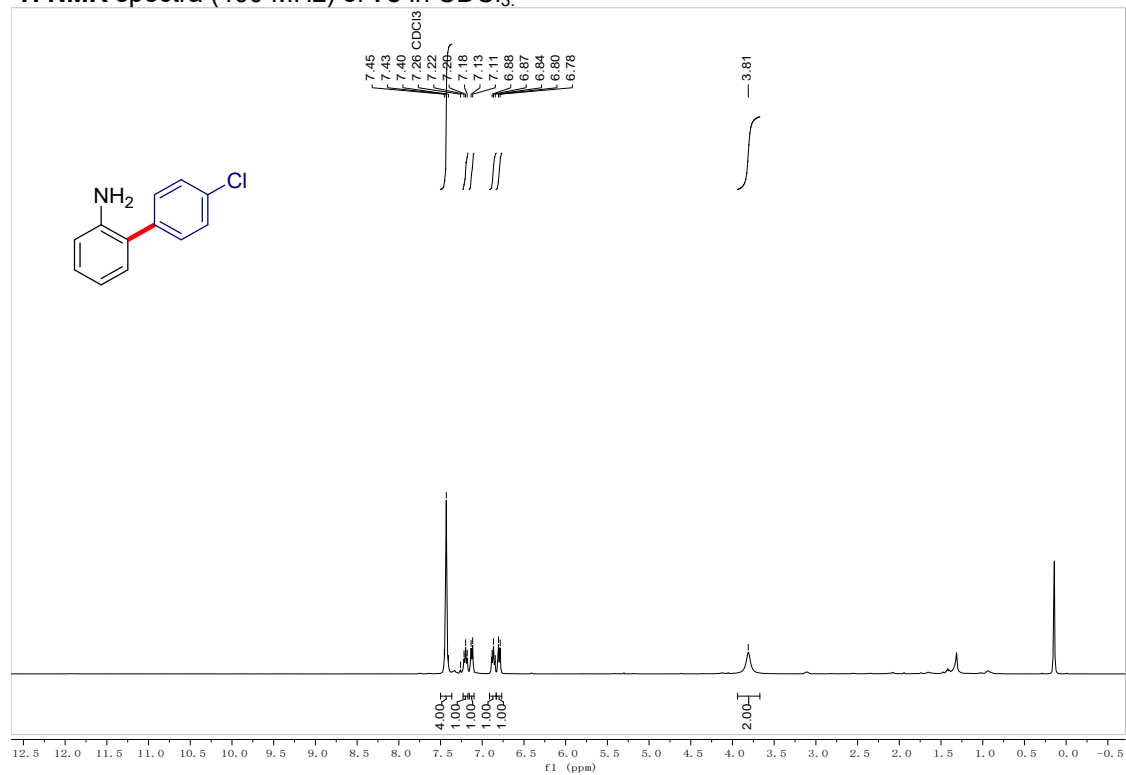

**<sup>13</sup>C NMR spectra (101 MHz) of 78 in CDCl<sub>3</sub>.**

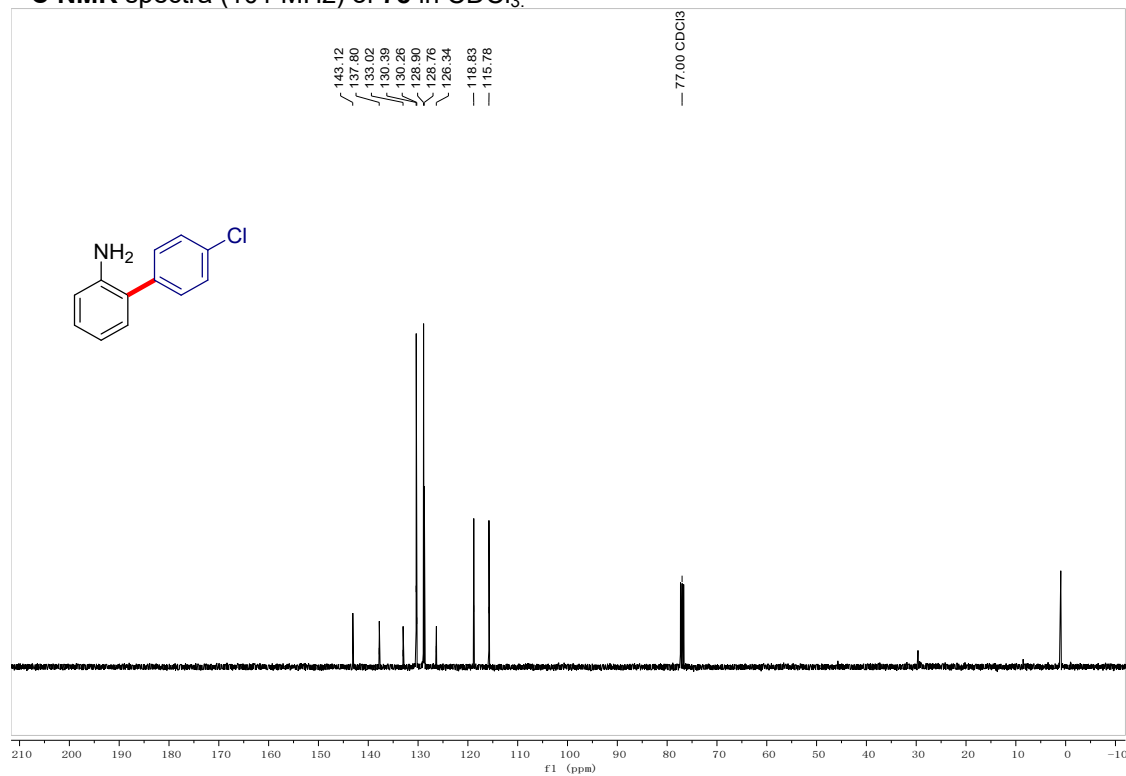

# SUPPORTING INFORMATION

$^1\text{H}$  NMR spectra (400 MHz) of **79** in  $\text{CDCl}_3$ .

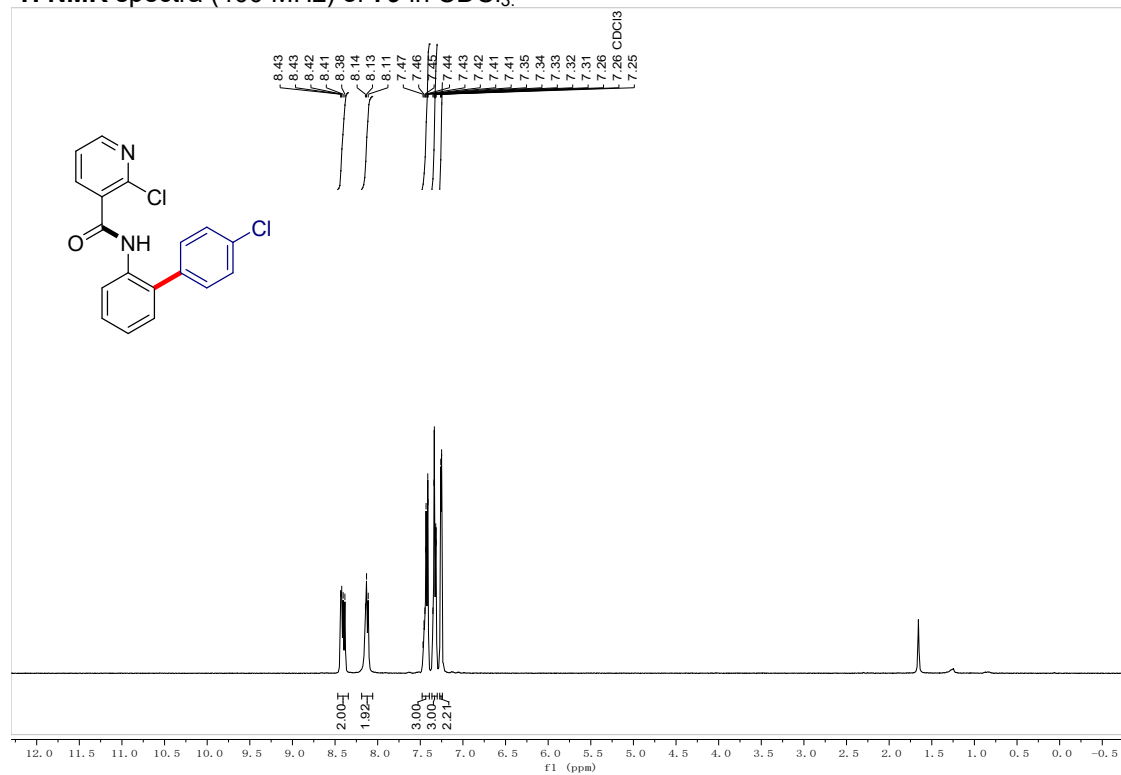

$^{13}\text{C}$  NMR spectra (101 MHz) of **79** in  $\text{CDCl}_3$ .

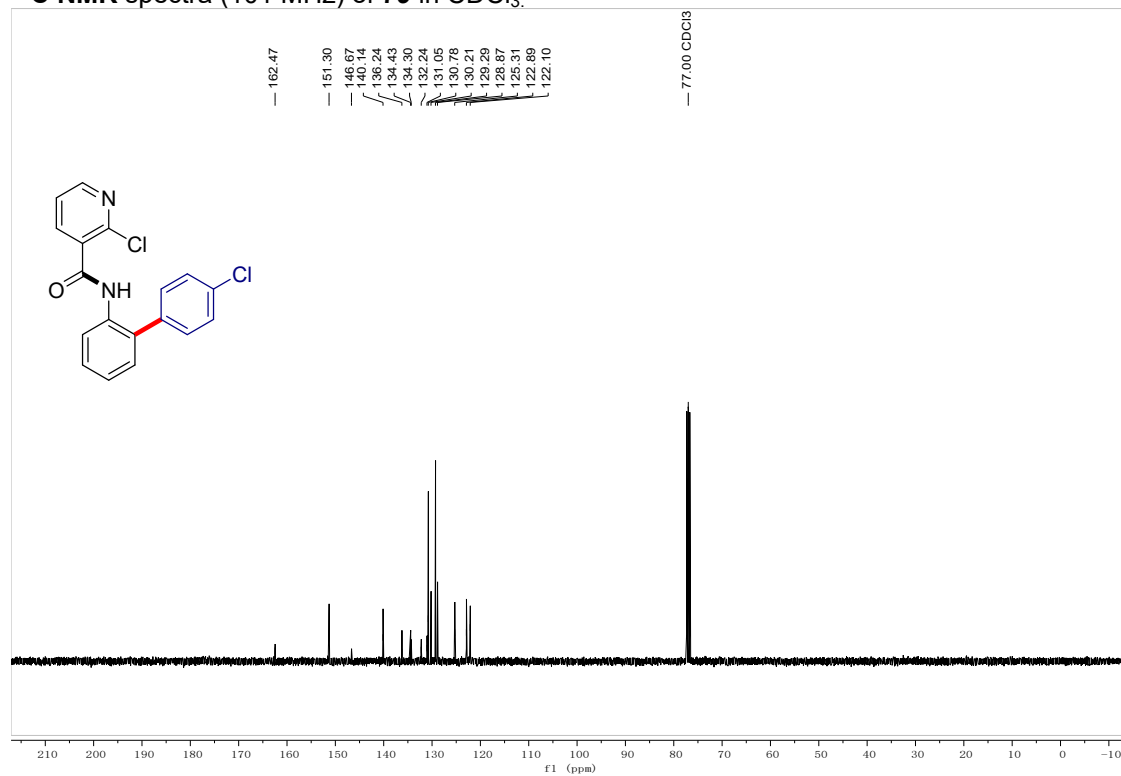

# SUPPORTING INFORMATION

$^1\text{H}$  NMR spectra (400 MHz) of **80** in  $\text{CDCl}_3$ .

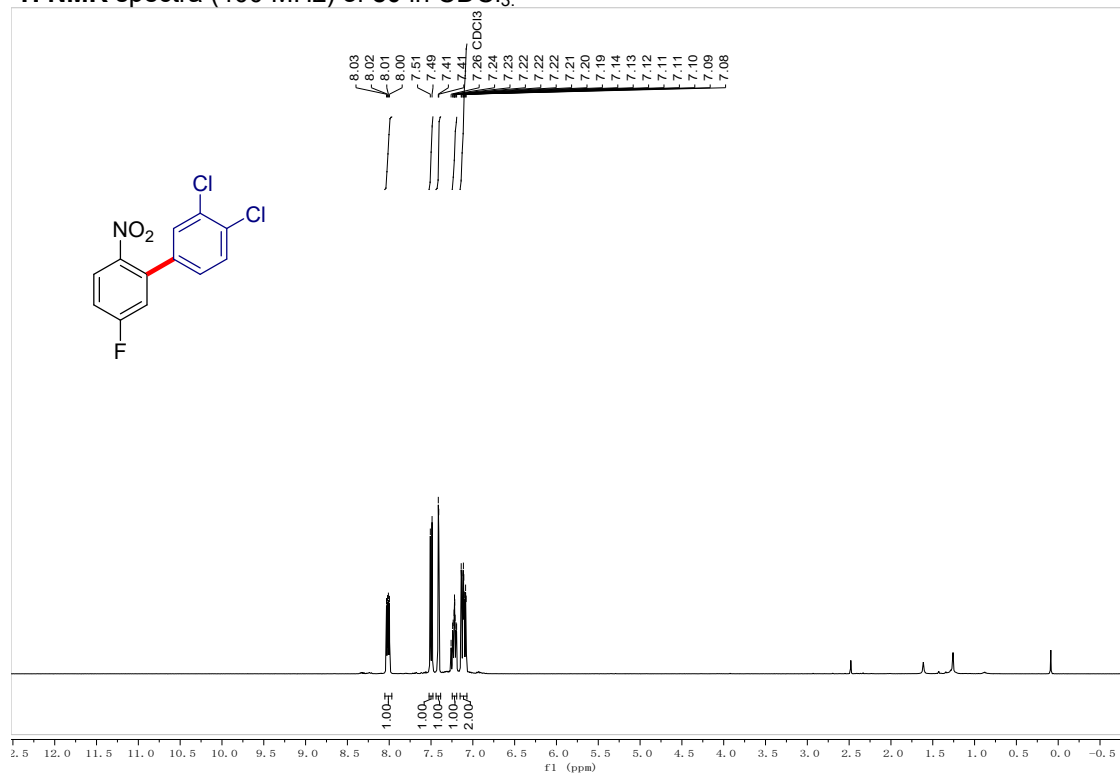

$^{13}\text{C}$  NMR spectra (101 MHz) of **80** in  $\text{CDCl}_3$ .

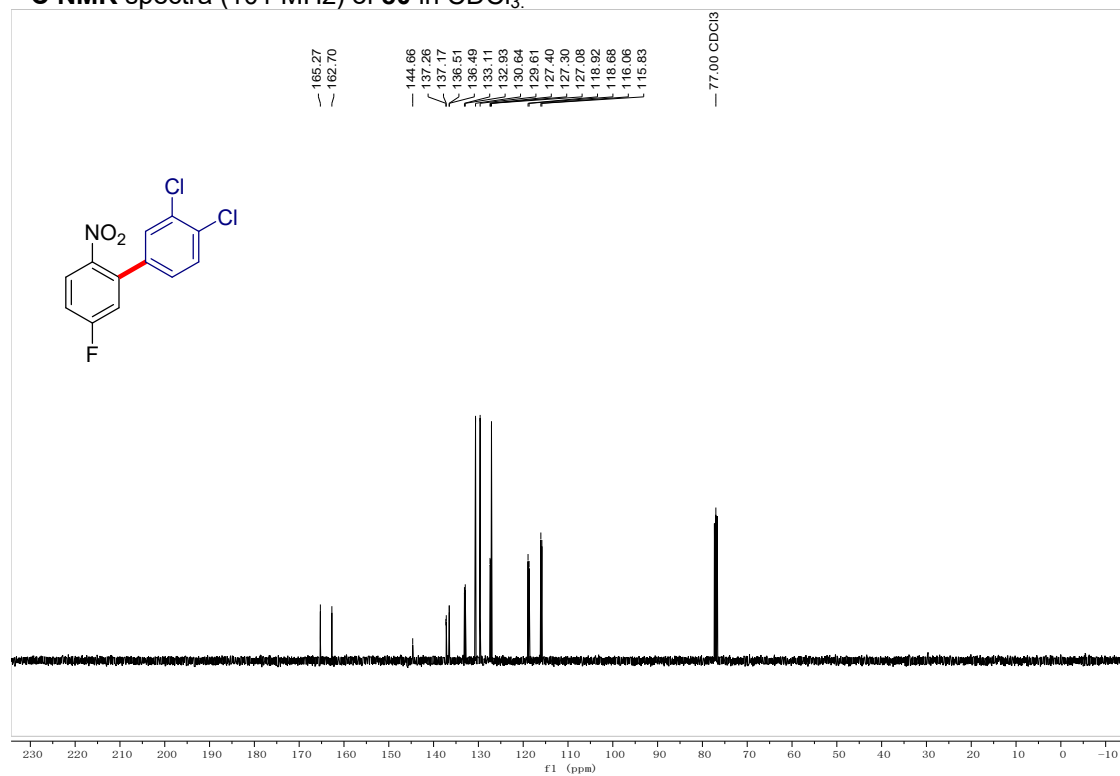

# SUPPORTING INFORMATION

<sup>19</sup>F NMR spectra (377 MHz) of **80** in CDCl<sub>3</sub>.

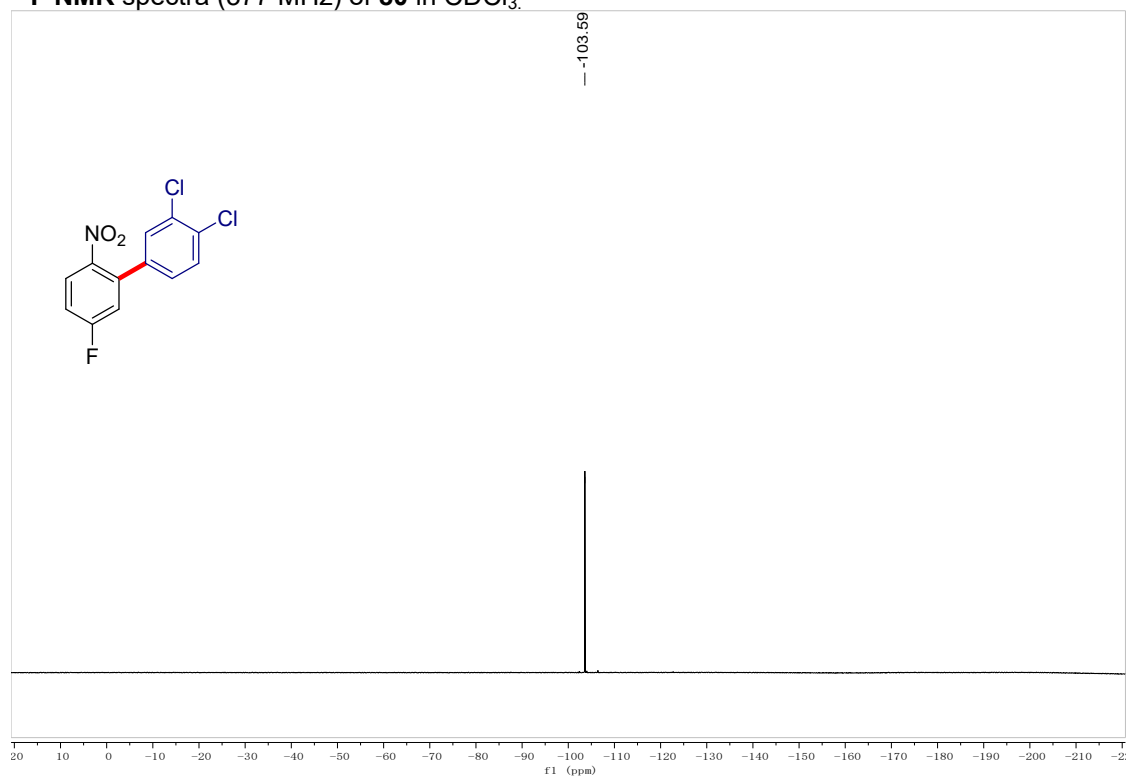

# SUPPORTING INFORMATION

$^1\text{H}$  NMR spectra (400 MHz) of **81** in  $\text{CDCl}_3$

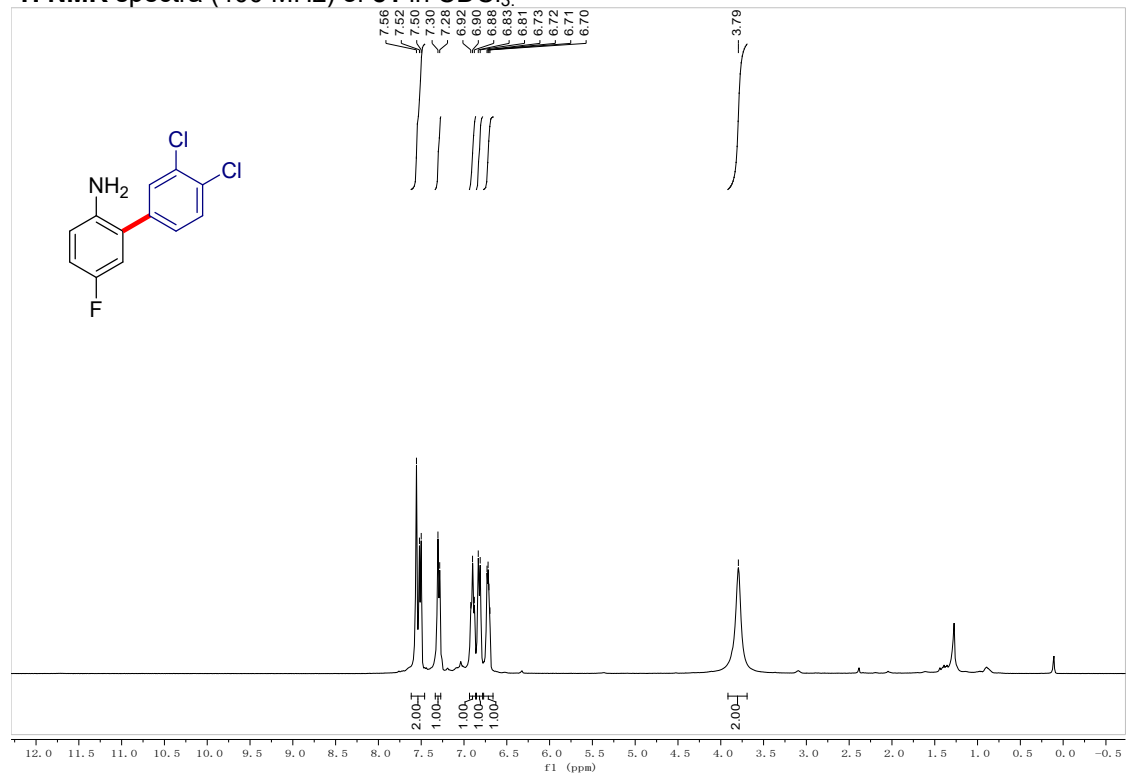

$^{13}\text{C}$  NMR spectra (101 MHz) of **81** in  $\text{CDCl}_3$

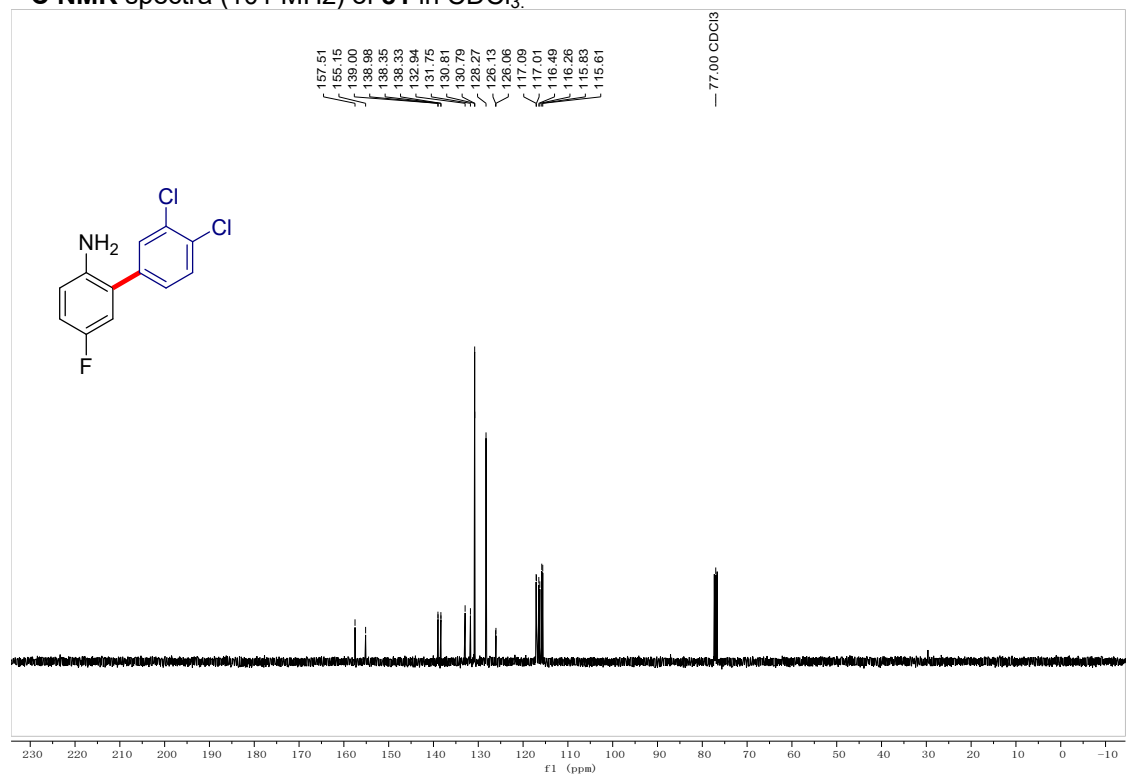

# SUPPORTING INFORMATION

$^{19}\text{F}$  NMR spectra (377 MHz) of **81** in  $\text{CDCl}_3$ .

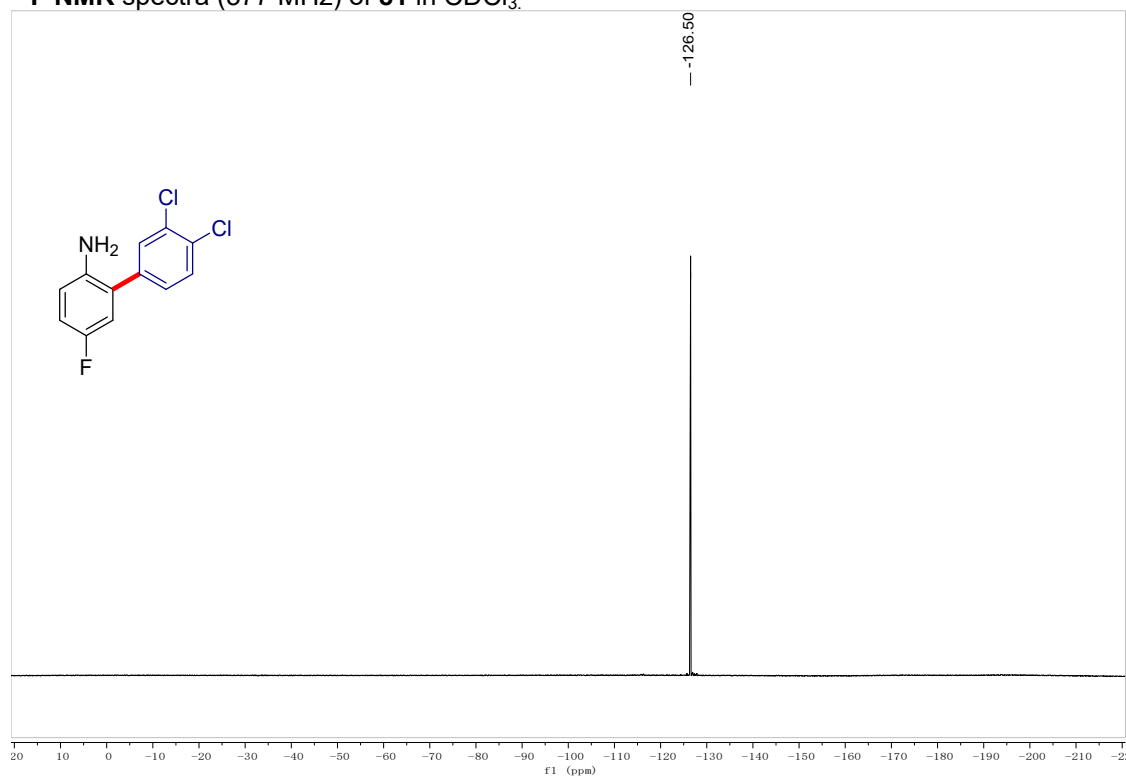

# SUPPORTING INFORMATION

<sup>1</sup>H NMR spectra (400 MHz) of **82** in CDCl<sub>3</sub>.

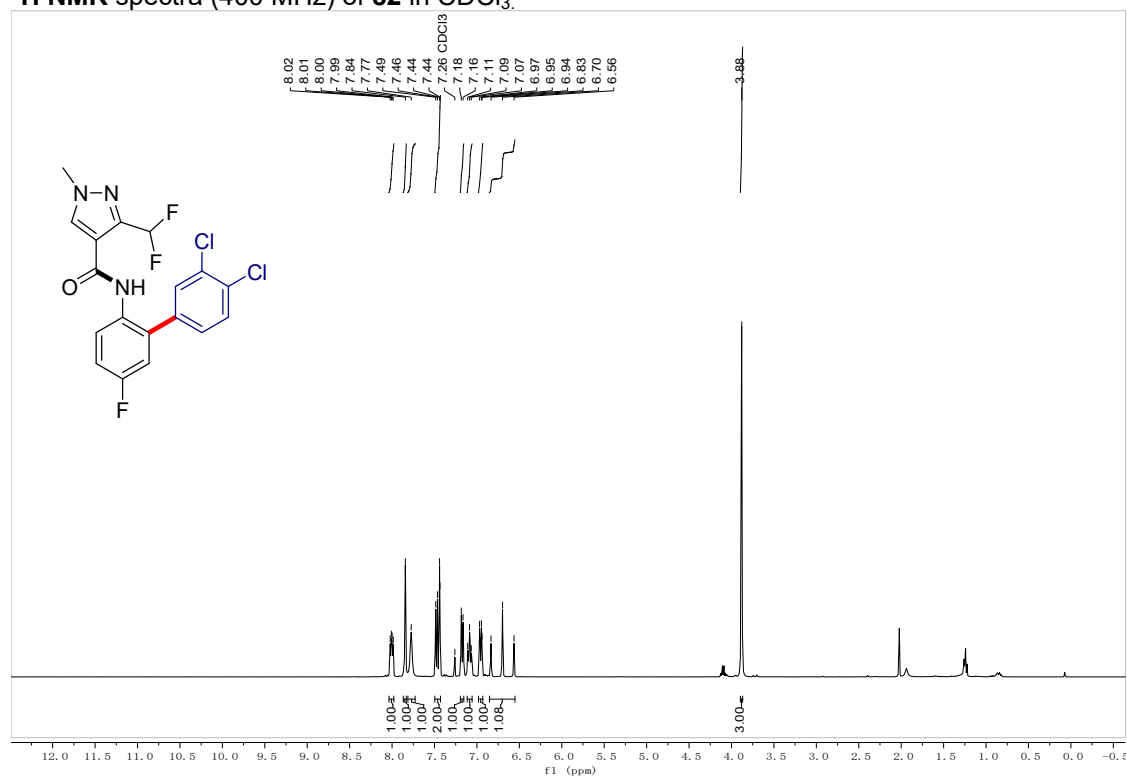

<sup>13</sup>C NMR spectra (101 MHz) of **82** in CDCl<sub>3</sub>.

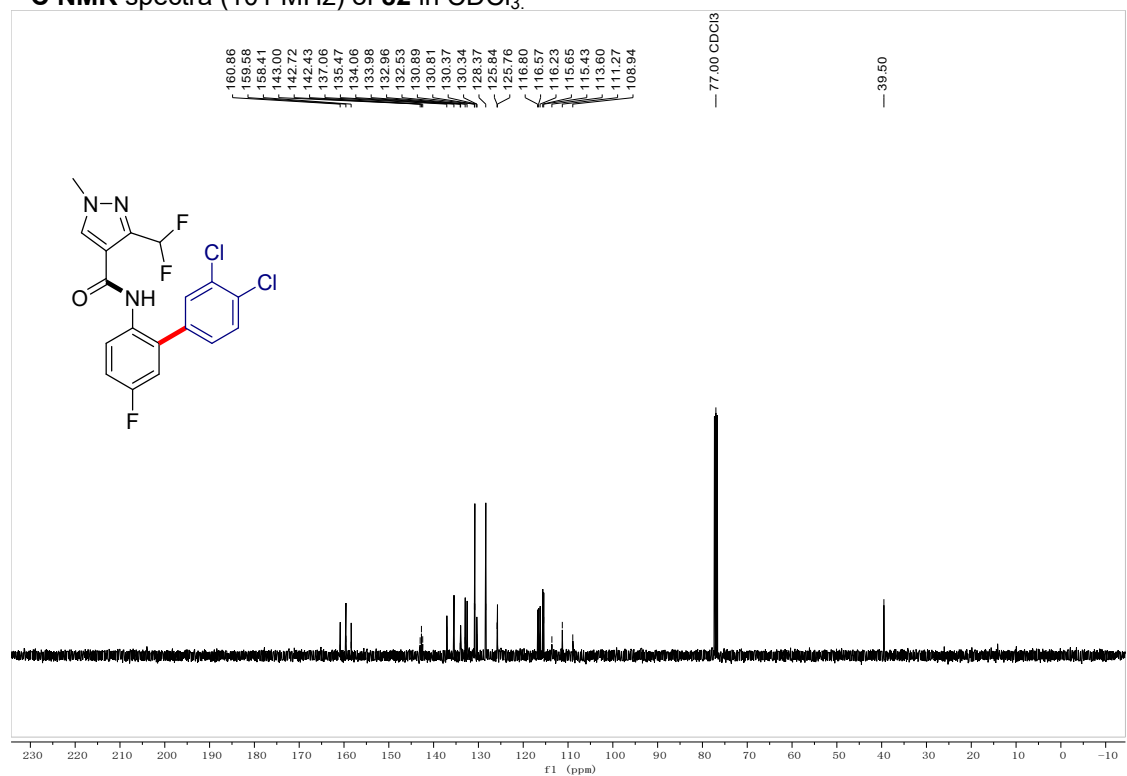

# SUPPORTING INFORMATION

<sup>19</sup>F NMR spectra (377 MHz) of **82** in CDCl<sub>3</sub>.

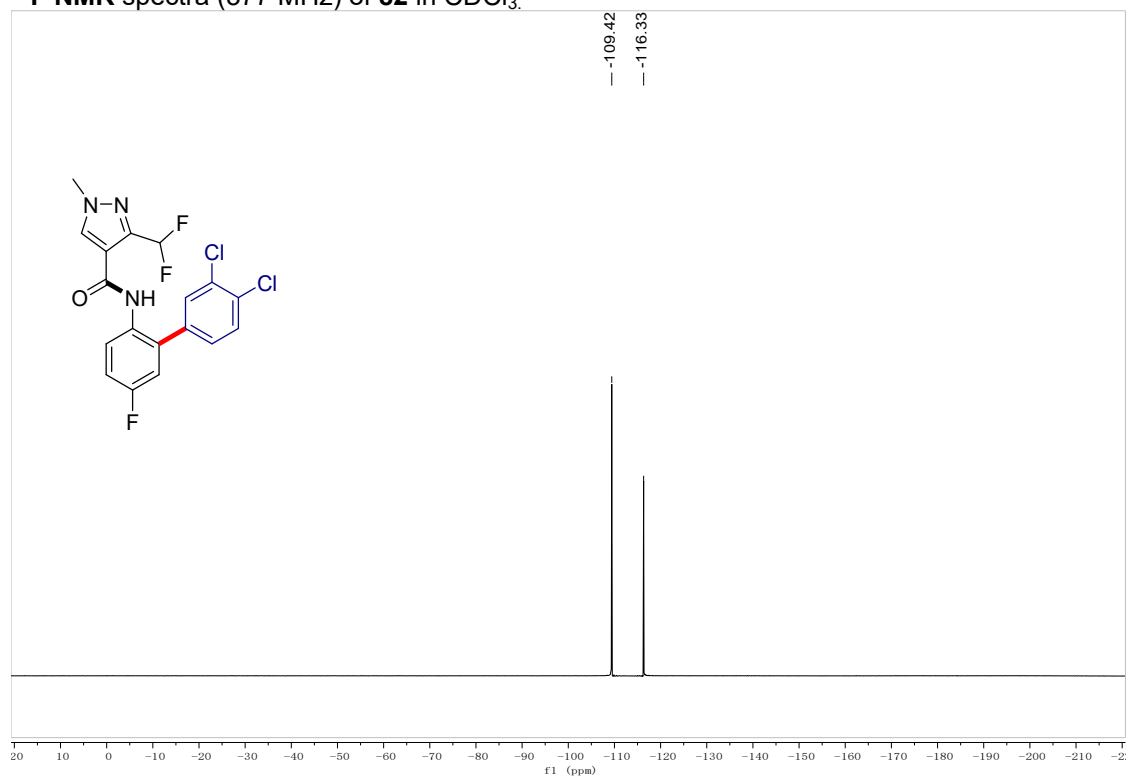

## References

- 1 J. Tang, A. Biafora and L. J. Goossen, *Angew. Chem., Int. Ed.*, 2015, **54**, 13130–13133.
- 2 a) Y. Wu, Y.-H. Huang, X.-Y. Chen and P. Wang, *Org. Lett.*, 2020, **22**, 6657–6661; b) Z.-W. Cao, J.-X. Zhang, J.-T. Wang, L. Li, X.-Y. Chen, S. Jin, Z.-Y. Cao and P. Wang, *Org. Lett.*, 2024, **26**, 6681–6686; c) Z.-H. Lin, Y.-F. Yao and C.-P. Zhang, *Org. Lett.*, 2022, **24**, 8417–8422; d) X.-Y. Chen, Y.-N. Li, Y. Wu, J. Bai, Y. Guo, and P. Wang, *J. Am. Chem. Soc.*, 2023, **145**, 10431–10440.
- 3 J.-F. Wei, J. Jiao, J.-J. Feng, J. Lv, X.-R. Zhang, X.-Y. Shi and Z.-G. Chen, *J. Org. Chem.*, 2009, **74**, 6283–6286.
- 4 M. R. Yadav, M. Nagaoka, M. Kashihara, R.-L. Zhong, T. Miyazaki, S. Sakaki and Y. Nakao, *J. Am. Chem. Soc.*, 2017, **139**, 9423–9426.
- 5 P. Gao, X. Wu, D. Zhang, X. Sun, G. Zhang and F. Chen *J. Org. Chem.*, 2024, **89**, 12197–12203.
- 6 M. Ramanathan and S. Liu, *J. Org. Chem.*, 2015, **80**, 5329–5336.
- 7 M. Majek, F. Filace and A. J. Wangelin, *Chem. Eur. J.*, 2015, **21**, 4518–4522.
- 8 B. Exner, B. Bayarmagnai, C. Matheis and L. J. Goossen. *J. Fluorine Chem.*, 2017, **198**, 89–93.
- 9 G. Fabrizi, A. Goggiaman, A. Sferrazza and S. Cacchi, *Angew. Chem., Int. Ed.*, 2010, **49**, 4067–4070.
- 10 G. Jakobson, J. Du, A. M. Z. Slawin, and P. Beier, *Beilstein J. Org. Chem.*, 2015, **11**, 1494–1502.
- 11 F.-X. Felpin, K. Miqueu, J.-M. Sotiropoulos, E. Fouquet, O. Iburguren and J. Laudien, *Chem. Eur. J.*, 2010, **16**, 5191–5204.
- 12 R. Berrino, S. Cacchi, G. Fabrizi, A. Goggiamania and P. Stabileb, *Org. Biomol. Chem.*, 2010, **8**, 4518–4520.
